# Supplementary material for: Subcellular sorting of neuregulins controls the assembly of excitatory-inhibitory cortical circuits
Source: eLife. 2020 Dec 15;9:e57000. doi: 10.7554/eLife.57000 (PMC7755390; doi:10.7554/eLife.57000)
Supplement: Figure 1—figure supplement 2—source data 1. [file elife-57000-fig1-figsupp2-data1.xlsx]

## Sheet: PV_cell_density
Genotype	Brain	ROI	Layer	Area_ROI	Count_pv_cells	Density_pv_cells
Nrg1_wildtype	DN104	1	L1	59531.7	0	0
Nrg1_wildtype	DN104	1	L2_3	179151	21	117.22
Nrg1_wildtype	DN104	1	L4	113983	20	175.465
Nrg1_wildtype	DN104	1	L5	184832	33	178.54
Nrg1_wildtype	DN104	1	L6	235537	22	93.4035
Nrg1_wildtype	DN104	1	Total	773035	96	124.186
Nrg1_wildtype	DN104	2	L1	50612.9	0	0
Nrg1_wildtype	DN104	2	L2_3	182489	12	65.7576
Nrg1_wildtype	DN104	2	L4	107376	21	195.574
Nrg1_wildtype	DN104	2	L5	144924	26	179.404
Nrg1_wildtype	DN104	2	L6	283145	28	98.8892
Nrg1_wildtype	DN104	2	Total	768547	87	113.201
Nrg1_wildtype	DN104	3	L1	49710.7	0	0
Nrg1_wildtype	DN104	3	L2_3	190794	14	73.3774
Nrg1_wildtype	DN104	3	L4	125354	20	159.549
Nrg1_wildtype	DN104	3	L5	173274	24	138.509
Nrg1_wildtype	DN104	3	L6	232475	16	68.8247
Nrg1_wildtype	DN104	3	Total	771607	74	95.9038
Nrg1_wildtype	DN104	4	L1	53797.1	0	0
Nrg1_wildtype	DN104	4	L2_3	173770	7	40.2833
Nrg1_wildtype	DN104	4	L4	131366	18	137.022
Nrg1_wildtype	DN104	4	L5	178997	28	156.427
Nrg1_wildtype	DN104	4	L6	225872	19	84.1183
Nrg1_wildtype	DN104	4	Total	763802	72	94.2653
Nrg1_wildtype	DN104	5	L1	54444.4	0	0
Nrg1_wildtype	DN104	5	L2_3	178701	15	83.9393
Nrg1_wildtype	DN104	5	L4	144605	27	186.715
Nrg1_wildtype	DN104	5	L5	133356	20	149.974
Nrg1_wildtype	DN104	5	L6	221196	12	54.2505
Nrg1_wildtype	DN104	5	Total	732303	74	101.051
Nrg1_wildtype	DN104	6	L1	45101	0	0
Nrg1_wildtype	DN104	6	L2_3	171315	12	70.0462
Nrg1_wildtype	DN104	6	L4	113242	19	167.783
Nrg1_wildtype	DN104	6	L5	159791	21	131.422
Nrg1_wildtype	DN104	6	L6	175021	9	51.4225
Nrg1_wildtype	DN104	6	Total	664470	61	91.8025
Nrg1_wildtype	DN104	7	L1	49304.4	0	0
Nrg1_wildtype	DN104	7	L2_3	150039	9	59.9844
Nrg1_wildtype	DN104	7	L4	109153	19	174.068
Nrg1_wildtype	DN104	7	L5	145980	17	116.454
Nrg1_wildtype	DN104	7	L6	212394	24	112.997
Nrg1_wildtype	DN104	7	Total	666871	69	103.468
Nrg1_wildtype	DN104	8	L1	58383.8	0	0
Nrg1_wildtype	DN104	8	L2_3	157484	18	114.297
Nrg1_wildtype	DN104	8	L4	102025	20	196.031
Nrg1_wildtype	DN104	8	L5	156474	20	127.817
Nrg1_wildtype	DN104	8	L6	177401	17	95.8279
Nrg1_wildtype	DN104	8	Total	651768	75	115.072
Nrg1_wildtype	DN104	9	L1	65376.5	0	0
Nrg1_wildtype	DN104	9	L2_3	173758	13	74.8167
Nrg1_wildtype	DN104	9	L4	121915	20	164.049
Nrg1_wildtype	DN104	9	L5	172856	23	133.059
Nrg1_wildtype	DN104	9	L6	227410	20	87.9467
Nrg1_wildtype	DN104	9	Total	761315	76	99.8272
Nrg1_wildtype	DN105	1	L1	65929.8	0	0
Nrg1_wildtype	DN105	1	L2_3	212817	22	103.375
Nrg1_wildtype	DN105	1	L4	113173	27	238.574
Nrg1_wildtype	DN105	1	L5	147440	20	135.648
Nrg1_wildtype	DN105	1	L6	224621	22	97.9427
Nrg1_wildtype	DN105	1	Total	763981	91	119.113
Nrg1_wildtype	DN105	2	L1	49699.3	0	0
Nrg1_wildtype	DN105	2	L2_3	193202	16	82.8147
Nrg1_wildtype	DN105	2	L4	120301	22	182.875
Nrg1_wildtype	DN105	2	L5	185243	32	172.746
Nrg1_wildtype	DN105	2	L6	229761	17	73.9899
Nrg1_wildtype	DN105	2	Total	778207	87	111.795
Nrg1_wildtype	DN105	3	L1	61882.5	0	0
Nrg1_wildtype	DN105	3	L2_3	199075	20	100.465
Nrg1_wildtype	DN105	3	L4	126343	29	229.534
Nrg1_wildtype	DN105	3	L5	154617	24	155.223
Nrg1_wildtype	DN105	3	L6	219725	23	104.677
Nrg1_wildtype	DN105	3	Total	761641	96	126.044
Nrg1_wildtype	DN105	4	L1	51462.4	0	0
Nrg1_wildtype	DN105	4	L2_3	182518	20	109.578
Nrg1_wildtype	DN105	4	L4	125833	24	190.728
Nrg1_wildtype	DN105	4	L5	167771	29	172.855
Nrg1_wildtype	DN105	4	L6	214713	18	83.8328
Nrg1_wildtype	DN105	4	Total	742298	91	122.592
Nrg1_wildtype	DN105	5	L1	59416.9	0	0
Nrg1_wildtype	DN105	5	L2_3	190680	13	68.1772
Nrg1_wildtype	DN105	5	L4	137826	17	123.344
Nrg1_wildtype	DN105	5	L5	157629	22	139.569
Nrg1_wildtype	DN105	5	L6	199963	15	75.0138
Nrg1_wildtype	DN105	5	Total	745514	67	89.8709
Nrg1_wildtype	DN105	6	L1	52247.5	0	0
Nrg1_wildtype	DN105	6	L2_3	192688	8	41.5178
Nrg1_wildtype	DN105	6	L4	125969	17	134.954
Nrg1_wildtype	DN105	6	L5	145374	14	96.3032
Nrg1_wildtype	DN105	6	L6	231361	16	69.1559
Nrg1_wildtype	DN105	6	Total	747640	55	73.5648
Nrg1_wildtype	DN105	7	L1	54446.7	0	0
Nrg1_wildtype	DN105	7	L2_3	172573	9	52.1517
Nrg1_wildtype	DN105	7	L4	122094	21	171.999
Nrg1_wildtype	DN105	7	L5	160287	29	180.926
Nrg1_wildtype	DN105	7	L6	199373	11	55.1729
Nrg1_wildtype	DN105	7	Total	708774	70	98.7621
Nrg1_wildtype	DN105	8	L1	52998.2	0	0
Nrg1_wildtype	DN105	8	L2_3	191123	9	47.0902
Nrg1_wildtype	DN105	8	L4	129766	22	169.536
Nrg1_wildtype	DN105	8	L5	156589	31	197.971
Nrg1_wildtype	DN105	8	L6	213721	17	79.5428
Nrg1_wildtype	DN105	8	Total	744197	79	106.155
Nrg1_wildtype	DN105	9	L1	50753	0	0
Nrg1_wildtype	DN105	9	L2_3	173315	19	109.627
Nrg1_wildtype	DN105	9	L4	120459	25	207.539
Nrg1_wildtype	DN105	9	L5	159989	34	212.515
Nrg1_wildtype	DN105	9	L6	189332	19	100.353
Nrg1_wildtype	DN105	9	Total	693848	97	139.8
Nrg1_mutant	DN106	1	L1	62405.9	0	0
Nrg1_mutant	DN106	1	L2_3	209210	21	100.377
Nrg1_mutant	DN106	1	L4	114201	28	245.182
Nrg1_mutant	DN106	1	L5	173324	29	167.317
Nrg1_mutant	DN106	1	L6	240764	22	91.3756
Nrg1_mutant	DN106	1	Total	799906	100	125.015
Nrg1_mutant	DN106	2	L1	53792.5	0	0
Nrg1_mutant	DN106	2	L2_3	206336	22	106.622
Nrg1_mutant	DN106	2	L4	109378	28	255.993
Nrg1_mutant	DN106	2	L5	187206	25	133.543
Nrg1_mutant	DN106	2	L6	218623	16	73.1855
Nrg1_mutant	DN106	2	Total	775335	91	117.369
Nrg1_mutant	DN106	3	L1	48053.3	0	0
Nrg1_mutant	DN106	3	L2_3	178565	9	50.4018
Nrg1_mutant	DN106	3	L4	123928	20	161.384
Nrg1_mutant	DN106	3	L5	173708	23	132.406
Nrg1_mutant	DN106	3	L6	239522	16	66.7996
Nrg1_mutant	DN106	3	Total	763776	68	89.0313
Nrg1_mutant	DN106	4	L1	57121.2	0	0
Nrg1_mutant	DN106	4	L2_3	170347	13	76.315
Nrg1_mutant	DN106	4	L4	131171	28	213.462
Nrg1_mutant	DN106	4	L5	168088	22	130.884
Nrg1_mutant	DN106	4	L6	220579	22	99.7377
Nrg1_mutant	DN106	4	Total	747305	85	113.742
Nrg1_mutant	DN106	5	L1	55316.8	0	0
Nrg1_mutant	DN106	5	L2_3	179830	12	66.7296
Nrg1_mutant	DN106	5	L4	127989	20	156.263
Nrg1_mutant	DN106	5	L5	175909	33	187.597
Nrg1_mutant	DN106	5	L6	206035	23	111.631
Nrg1_mutant	DN106	5	Total	745080	88	118.108
Nrg1_mutant	DN106	6	L1	45369.6	0	0
Nrg1_mutant	DN106	6	L2_3	179614	12	66.8098
Nrg1_mutant	DN106	6	L4	115721	33	285.169
Nrg1_mutant	DN106	6	L5	159155	27	169.646
Nrg1_mutant	DN106	6	L6	220326	23	104.391
Nrg1_mutant	DN106	6	Total	720186	95	131.91
Nrg1_mutant	DN106	7	L1	47056.9	0	0
Nrg1_mutant	DN106	7	L2_3	180519	13	72.0147
Nrg1_mutant	DN106	7	L4	116618	19	162.924
Nrg1_mutant	DN106	7	L5	174174	27	155.018
Nrg1_mutant	DN106	7	L6	196621	17	86.4609
Nrg1_mutant	DN106	7	Total	714989	76	106.295
Nrg1_mutant	DN106	8	L1	51297.1	0	0
Nrg1_mutant	DN106	8	L2_3	165739	12	72.4029
Nrg1_mutant	DN106	8	L4	118648	27	227.564
Nrg1_mutant	DN106	8	L5	163134	26	159.379
Nrg1_mutant	DN106	8	L6	203281	16	78.709
Nrg1_mutant	DN106	8	Total	702098	81	115.368
Nrg1_mutant	DN106	9	L1	49086.3	0	0
Nrg1_mutant	DN106	9	L2_3	177064	16	90.3629
Nrg1_mutant	DN106	9	L4	91779.2	12	130.749
Nrg1_mutant	DN106	9	L5	164699	26	157.863
Nrg1_mutant	DN106	9	L6	187241	14	74.7701
Nrg1_mutant	DN106	9	Total	669869	68	101.512
Nrg1_mutant	DN107	1	L1	61205.2	0	0
Nrg1_mutant	DN107	1	L2_3	196120	22	112.176
Nrg1_mutant	DN107	1	L4	115197	24	208.338
Nrg1_mutant	DN107	1	L5	152693	21	137.531
Nrg1_mutant	DN107	1	L6	228554	21	91.8821
Nrg1_mutant	DN107	1	Total	753770	88	116.747
Nrg1_mutant	DN107	2	L1	48882	0	0
Nrg1_mutant	DN107	2	L2_3	182886	15	82.0185
Nrg1_mutant	DN107	2	L4	103923	28	269.429
Nrg1_mutant	DN107	2	L5	184105	17	92.3388
Nrg1_mutant	DN107	2	L6	233398	20	85.6907
Nrg1_mutant	DN107	2	Total	753193	80	106.214
Nrg1_mutant	DN107	3	L1	49345.7	0	0
Nrg1_mutant	DN107	3	L2_3	168301	14	83.1842
Nrg1_mutant	DN107	3	L4	121134	24	198.128
Nrg1_mutant	DN107	3	L5	151749	16	105.437
Nrg1_mutant	DN107	3	L6	233347	12	51.4255
Nrg1_mutant	DN107	3	Total	723877	66	91.1757
Nrg1_mutant	DN107	4	L1	65794.3	0	0
Nrg1_mutant	DN107	4	L2_3	173101	11	63.5465
Nrg1_mutant	DN107	4	L4	139238	32	229.823
Nrg1_mutant	DN107	4	L5	145354	21	144.475
Nrg1_mutant	DN107	4	L6	209938	13	61.923
Nrg1_mutant	DN107	4	Total	733425	77	104.987
Nrg1_mutant	DN107	5	L1	65006.9	0	0
Nrg1_mutant	DN107	5	L2_3	170489	17	99.7132
Nrg1_mutant	DN107	5	L4	121118	22	181.641
Nrg1_mutant	DN107	5	L5	145204	19	130.85
Nrg1_mutant	DN107	5	L6	209279	10	47.7831
Nrg1_mutant	DN107	5	Total	711097	68	95.6269
Nrg1_mutant	DN107	6	L1	62348.5	0	0
Nrg1_mutant	DN107	6	L2_3	183795	17	92.4945
Nrg1_mutant	DN107	6	L4	122041	21	172.074
Nrg1_mutant	DN107	6	L5	152922	15	98.089
Nrg1_mutant	DN107	6	L6	203579	20	98.242
Nrg1_mutant	DN107	6	Total	724685	73	100.733
Nrg1_mutant	DN107	7	L1	50714	0	0
Nrg1_mutant	DN107	7	L2_3	173157	11	63.5263
Nrg1_mutant	DN107	7	L4	130838	24	183.433
Nrg1_mutant	DN107	7	L5	163655	24	146.65
Nrg1_mutant	DN107	7	L6	196198	7	35.6782
Nrg1_mutant	DN107	7	Total	714562	66	92.3643
Nrg1_mutant	DN107	8	L1	54462.8	0	0
Nrg1_mutant	DN107	8	L2_3	165996	11	66.2665
Nrg1_mutant	DN107	8	L4	118423	25	211.108
Nrg1_mutant	DN107	8	L5	155262	25	161.018
Nrg1_mutant	DN107	8	L6	172397	10	58.0057
Nrg1_mutant	DN107	8	Total	666540	71	106.52
Nrg1_mutant	DN107	9	L1	54136.8	0	0
Nrg1_mutant	DN107	9	L2_3	165060	10	60.5841
Nrg1_mutant	DN107	9	L4	130902	12	91.6715
Nrg1_mutant	DN107	9	L5	153283	23	150.049
Nrg1_mutant	DN107	9	L6	183000	11	60.1091
Nrg1_mutant	DN107	9	Total	686382	56	81.5872
Nrg1_wildtype	DN111	1	L1	57353.1	0	0
Nrg1_wildtype	DN111	1	L2_3	181995	13	71.4305
Nrg1_wildtype	DN111	1	L4	130719	26	198.901
Nrg1_wildtype	DN111	1	L5	171912	14	81.4369
Nrg1_wildtype	DN111	1	L6	239807	17	70.8903
Nrg1_wildtype	DN111	1	Total	781786	70	89.5386
Nrg1_wildtype	DN111	2	L1	61579.4	0	0
Nrg1_wildtype	DN111	2	L2_3	172323	17	98.6518
Nrg1_wildtype	DN111	2	L4	135725	24	176.828
Nrg1_wildtype	DN111	2	L5	166575	19	114.063
Nrg1_wildtype	DN111	2	L6	209635	18	85.8635
Nrg1_wildtype	DN111	2	Total	745838	78	104.58
Nrg1_wildtype	DN111	3	L1	60016.1	0	0
Nrg1_wildtype	DN111	3	L2_3	170909	12	70.2128
Nrg1_wildtype	DN111	3	L4	118398	21	177.368
Nrg1_wildtype	DN111	3	L5	157498	25	158.732
Nrg1_wildtype	DN111	3	L6	199337	18	90.2995
Nrg1_wildtype	DN111	3	Total	706157	76	107.625
Nrg1_wildtype	DN111	4	L1	51088.2	0	0
Nrg1_wildtype	DN111	4	L2_3	185742	27	145.363
Nrg1_wildtype	DN111	4	L4	121026	23	190.042
Nrg1_wildtype	DN111	4	L5	180904	28	154.778
Nrg1_wildtype	DN111	4	L6	209483	14	66.8311
Nrg1_wildtype	DN111	4	Total	748244	92	122.955
Nrg1_wildtype	DN111	5	L1	52954.5	0	0
Nrg1_wildtype	DN111	5	L2_3	174061	9	51.706
Nrg1_wildtype	DN111	5	L4	111129	21	188.969
Nrg1_wildtype	DN111	5	L5	177725	23	129.413
Nrg1_wildtype	DN111	5	L6	181520	14	77.1266
Nrg1_wildtype	DN111	5	Total	697390	67	96.0725
Nrg1_wildtype	DN111	6	L1	57206.2	0	0
Nrg1_wildtype	DN111	6	L2_3	180464	11	60.9541
Nrg1_wildtype	DN111	6	L4	109493	20	182.661
Nrg1_wildtype	DN111	6	L5	173625	24	138.229
Nrg1_wildtype	DN111	6	L6	202284	13	64.266
Nrg1_wildtype	DN111	6	Total	723072	68	94.0432
Nrg1_wildtype	DN111	7	L1	59451.3	0	0
Nrg1_wildtype	DN111	7	L2_3	146506	13	88.7336
Nrg1_wildtype	DN111	7	L4	125466	21	167.376
Nrg1_wildtype	DN111	7	L5	138779	28	201.76
Nrg1_wildtype	DN111	7	L6	185944	15	80.6697
Nrg1_wildtype	DN111	7	Total	656146	77	117.352
Nrg1_wildtype	DN111	8	L1	50282.4	0	0
Nrg1_wildtype	DN111	8	L2_3	153744	10	65.0431
Nrg1_wildtype	DN111	8	L4	124493	24	192.782
Nrg1_wildtype	DN111	8	L5	150886	21	139.178
Nrg1_wildtype	DN111	8	L6	207229	17	82.0348
Nrg1_wildtype	DN111	8	Total	686635	72	104.859
Nrg1_wildtype	DN111	9	L1	52465.6	0	0
Nrg1_wildtype	DN111	9	L2_3	177688	9	50.6505
Nrg1_wildtype	DN111	9	L4	137785	15	108.866
Nrg1_wildtype	DN111	9	L5	186148	24	128.93
Nrg1_wildtype	DN111	9	L6	207013	25	120.765
Nrg1_wildtype	DN111	9	Total	761100	73	95.9139
Nrg1_wildtype	DN113	1	L1	61134.1	0	0
Nrg1_wildtype	DN113	1	L2_3	214382	8	37.3165
Nrg1_wildtype	DN113	1	L4	103898	16	153.997
Nrg1_wildtype	DN113	1	L5	177392	17	95.8329
Nrg1_wildtype	DN113	1	L6	221951	19	85.6043
Nrg1_wildtype	DN113	1	Total	778758	60	77.0457
Nrg1_wildtype	DN113	2	L1	48760.3	0	0
Nrg1_wildtype	DN113	2	L2_3	224901	10	44.4639
Nrg1_wildtype	DN113	2	L4	120347	22	182.805
Nrg1_wildtype	DN113	2	L5	176015	20	113.627
Nrg1_wildtype	DN113	2	L6	202257	13	64.2748
Nrg1_wildtype	DN113	2	Total	772280	65	84.1664
Nrg1_wildtype	DN113	3	L1	70509.6	0	0
Nrg1_wildtype	DN113	3	L2_3	193343	13	67.2382
Nrg1_wildtype	DN113	3	L4	144098	19	131.855
Nrg1_wildtype	DN113	3	L5	162674	16	98.3559
Nrg1_wildtype	DN113	3	L6	195914	17	86.7729
Nrg1_wildtype	DN113	3	Total	766538	65	84.7968
Nrg1_wildtype	DN113	4	L1	62917.8	0	0
Nrg1_wildtype	DN113	4	L2_3	170562	13	76.2184
Nrg1_wildtype	DN113	4	L4	125969	21	166.708
Nrg1_wildtype	DN113	4	L5	189408	27	142.55
Nrg1_wildtype	DN113	4	L6	196832	18	91.4486
Nrg1_wildtype	DN113	4	Total	745689	79	105.942
Nrg1_wildtype	DN113	5	L1	65775.9	0	0
Nrg1_wildtype	DN113	5	L2_3	184135	10	54.3081
Nrg1_wildtype	DN113	5	L4	146979	24	163.289
Nrg1_wildtype	DN113	5	L5	172922	27	156.139
Nrg1_wildtype	DN113	5	L6	199991	11	55.0025
Nrg1_wildtype	DN113	5	Total	769803	72	93.5305
Nrg1_wildtype	DN113	6	L1	52323.2	0	0
Nrg1_wildtype	DN113	6	L2_3	196120	12	61.1869
Nrg1_wildtype	DN113	6	L4	131400	20	152.207
Nrg1_wildtype	DN113	6	L5	174924	17	97.1849
Nrg1_wildtype	DN113	6	L6	205445	11	53.5422
Nrg1_wildtype	DN113	6	Total	760213	60	78.9252
Nrg1_wildtype	DN113	7	L1	59504.1	0	0
Nrg1_wildtype	DN113	7	L2_3	169091	8	47.3118
Nrg1_wildtype	DN113	7	L4	117677	21	178.455
Nrg1_wildtype	DN113	7	L5	156660	20	127.665
Nrg1_wildtype	DN113	7	L6	207904	15	72.1487
Nrg1_wildtype	DN113	7	Total	710836	64	90.0349
Nrg1_wildtype	DN113	8	L1	52812.2	0	0
Nrg1_wildtype	DN113	8	L2_3	163014	13	79.7476
Nrg1_wildtype	DN113	8	L4	131582	25	189.996
Nrg1_wildtype	DN113	8	L5	138053	19	137.628
Nrg1_wildtype	DN113	8	L6	187452	17	90.69
Nrg1_wildtype	DN113	8	Total	672913	74	109.97
Nrg1_wildtype	DN113	9	L1	60062	0	0
Nrg1_wildtype	DN113	9	L2_3	154215	11	71.329
Nrg1_wildtype	DN113	9	L4	109348	20	182.902
Nrg1_wildtype	DN113	9	L5	126678	19	149.986
Nrg1_wildtype	DN113	9	L6	172353	16	92.8327
Nrg1_wildtype	DN113	9	Total	622656	66	105.998
Nrg1_wildtype	DN115	1	L1	55647.4	0	0
Nrg1_wildtype	DN115	1	L2_3	166127	17	102.331
Nrg1_wildtype	DN115	1	L4	139261	27	193.881
Nrg1_wildtype	DN115	1	L5	173154	26	150.155
Nrg1_wildtype	DN115	1	L6	188056	17	90.3988
Nrg1_wildtype	DN115	1	Total	722245	87	120.458
Nrg1_wildtype	DN115	2	L1	55378.8	0	0
Nrg1_wildtype	DN115	2	L2_3	173852	19	109.288
Nrg1_wildtype	DN115	2	L4	143170	24	167.632
Nrg1_wildtype	DN115	2	L5	149876	27	180.149
Nrg1_wildtype	DN115	2	L6	202569	28	138.225
Nrg1_wildtype	DN115	2	Total	724846	98	135.201
Nrg1_wildtype	DN115	3	L1	65860.9	0	0
Nrg1_wildtype	DN115	3	L2_3	174197	11	63.1471
Nrg1_wildtype	DN115	3	L4	146561	24	163.754
Nrg1_wildtype	DN115	3	L5	153597	27	175.784
Nrg1_wildtype	DN115	3	L6	208058	17	81.708
Nrg1_wildtype	DN115	3	Total	748274	79	105.576
Nrg1_wildtype	DN115	4	L1	53344.8	0	0
Nrg1_wildtype	DN115	4	L2_3	170634	15	87.9077
Nrg1_wildtype	DN115	4	L4	124649	28	224.631
Nrg1_wildtype	DN115	4	L5	150266	23	153.062
Nrg1_wildtype	DN115	4	L6	184541	16	86.7017
Nrg1_wildtype	DN115	4	Total	683434	82	119.982
Nrg1_wildtype	DN115	5	L1	60335.2	0	0
Nrg1_wildtype	DN115	5	L2_3	158751	11	69.2908
Nrg1_wildtype	DN115	5	L4	125234	19	151.716
Nrg1_wildtype	DN115	5	L5	152438	20	131.201
Nrg1_wildtype	DN115	5	L6	170487	16	93.849
Nrg1_wildtype	DN115	5	Total	667245	66	98.9142
Nrg1_wildtype	DN115	6	L1	54265.4	0	0
Nrg1_wildtype	DN115	6	L2_3	164952	8	48.499
Nrg1_wildtype	DN115	6	L4	142874	31	216.974
Nrg1_wildtype	DN115	6	L5	169451	27	159.338
Nrg1_wildtype	DN115	6	L6	182918	13	71.0702
Nrg1_wildtype	DN115	6	Total	714461	79	110.573
Nrg1_wildtype	DN115	7	L1	52412.8	0	0
Nrg1_wildtype	DN115	7	L2_3	151384	17	112.297
Nrg1_wildtype	DN115	7	L4	130560	19	145.527
Nrg1_wildtype	DN115	7	L5	145723	21	144.109
Nrg1_wildtype	DN115	7	L6	169433	21	123.943
Nrg1_wildtype	DN115	7	Total	649513	78	120.09
Nrg1_wildtype	DN115	8	L1	49267.7	0	0
Nrg1_wildtype	DN115	8	L2_3	150684	12	79.6368
Nrg1_wildtype	DN115	8	L4	127991	13	101.569
Nrg1_wildtype	DN115	8	L5	150156	23	153.174
Nrg1_wildtype	DN115	8	L6	192672	15	77.8525
Nrg1_wildtype	DN115	8	Total	670771	63	93.9217
Nrg1_wildtype	DN115	9	L1	49986.2	0	0
Nrg1_wildtype	DN115	9	L2_3	156621	6	38.3091
Nrg1_wildtype	DN115	9	L4	106719	16	149.926
Nrg1_wildtype	DN115	9	L5	148457	21	141.455
Nrg1_wildtype	DN115	9	L6	154341	12	77.7498
Nrg1_wildtype	DN115	9	Total	616125	55	89.2676
Nrg1_wildtype	DN118	1	L1	50966.5	0	0
Nrg1_wildtype	DN118	1	L2_3	208721	14	67.0751
Nrg1_wildtype	DN118	1	L4	131680	20	151.883
Nrg1_wildtype	DN118	1	L5	156653	19	121.287
Nrg1_wildtype	DN118	1	L6	211467	12	56.7465
Nrg1_wildtype	DN118	1	Total	759488	65	85.584
Nrg1_wildtype	DN118	2	L1	54320.5	0	0
Nrg1_wildtype	DN118	2	L2_3	183882	13	70.6975
Nrg1_wildtype	DN118	2	L4	152987	19	124.194
Nrg1_wildtype	DN118	2	L5	145397	26	178.821
Nrg1_wildtype	DN118	2	L6	225558	19	84.2356
Nrg1_wildtype	DN118	2	Total	762144	77	101.031
Nrg1_wildtype	DN118	3	L1	49065.7	0	0
Nrg1_wildtype	DN118	3	L2_3	189031	9	47.6112
Nrg1_wildtype	DN118	3	L4	156230	28	179.222
Nrg1_wildtype	DN118	3	L5	162564	16	98.4226
Nrg1_wildtype	DN118	3	L6	227757	22	96.5941
Nrg1_wildtype	DN118	3	Total	784649	75	95.5842
Nrg1_wildtype	DN118	4	L1	54729.1	0	0
Nrg1_wildtype	DN118	4	L2_3	195755	16	81.7347
Nrg1_wildtype	DN118	4	L4	136458	21	153.894
Nrg1_wildtype	DN118	4	L5	168797	21	124.41
Nrg1_wildtype	DN118	4	L6	198356	13	65.5386
Nrg1_wildtype	DN118	4	Total	754096	71	94.1525
Nrg1_wildtype	DN118	5	L1	58606.5	0	0
Nrg1_wildtype	DN118	5	L2_3	173253	9	51.9472
Nrg1_wildtype	DN118	5	L4	151320	19	125.562
Nrg1_wildtype	DN118	5	L5	166540	17	102.077
Nrg1_wildtype	DN118	5	L6	220787	16	72.4679
Nrg1_wildtype	DN118	5	Total	770507	61	79.1686
Nrg1_wildtype	DN118	6	L1	55805.8	0	0
Nrg1_wildtype	DN118	6	L2_3	171977	11	63.9622
Nrg1_wildtype	DN118	6	L4	157849	32	202.725
Nrg1_wildtype	DN118	6	L5	149839	20	133.476
Nrg1_wildtype	DN118	6	L6	210755	14	66.4278
Nrg1_wildtype	DN118	6	Total	746226	77	103.186
Nrg1_wildtype	DN118	7	L1	51494.5	0	0
Nrg1_wildtype	DN118	7	L2_3	175909	15	85.2713
Nrg1_wildtype	DN118	7	L4	128567	24	186.672
Nrg1_wildtype	DN118	7	L5	160503	17	105.917
Nrg1_wildtype	DN118	7	L6	200239	11	54.9344
Nrg1_wildtype	DN118	7	Total	716713	67	93.4824
Nrg1_wildtype	DN118	8	L1	52355.4	0	0
Nrg1_wildtype	DN118	8	L2_3	186270	8	42.9485
Nrg1_wildtype	DN118	8	L4	130925	21	160.397
Nrg1_wildtype	DN118	8	L5	149320	15	100.455
Nrg1_wildtype	DN118	8	L6	210285	14	66.5764
Nrg1_wildtype	DN118	8	Total	729155	58	79.5441
Nrg1_wildtype	DN118	9	L1	63521.6	0	0
Nrg1_wildtype	DN118	9	L2_3	168740	11	65.1892
Nrg1_wildtype	DN118	9	L4	118698	21	176.919
Nrg1_wildtype	DN118	9	L5	158097	25	158.131
Nrg1_wildtype	DN118	9	L6	200257	13	64.9165
Nrg1_wildtype	DN118	9	Total	709314	70	98.687
Nrg1_wildtype	DN119	1	L1	70831	0	0
Nrg1_wildtype	DN119	1	L2_3	195363	15	76.7803
Nrg1_wildtype	DN119	1	L4	126869	30	236.465
Nrg1_wildtype	DN119	1	L5	152346	30	196.92
Nrg1_wildtype	DN119	1	L6	194061	17	87.6013
Nrg1_wildtype	DN119	1	Total	739470	92	124.413
Nrg1_wildtype	DN119	2	L1	47681.4	0	0
Nrg1_wildtype	DN119	2	L2_3	184304	14	75.9613
Nrg1_wildtype	DN119	2	L4	132397	20	151.061
Nrg1_wildtype	DN119	2	L5	171942	21	122.134
Nrg1_wildtype	DN119	2	L6	196458	15	76.3523
Nrg1_wildtype	DN119	2	Total	732782	70	95.5263
Nrg1_wildtype	DN119	3	L1	59864.6	0	0
Nrg1_wildtype	DN119	3	L2_3	192197	9	46.827
Nrg1_wildtype	DN119	3	L4	141116	16	113.382
Nrg1_wildtype	DN119	3	L5	162050	22	135.761
Nrg1_wildtype	DN119	3	L6	189807	16	84.2961
Nrg1_wildtype	DN119	3	Total	745034	63	84.5598
Nrg1_wildtype	DN119	4	L1	47419.7	0	0
Nrg1_wildtype	DN119	4	L2_3	183992	16	86.9602
Nrg1_wildtype	DN119	4	L4	133887	21	156.849
Nrg1_wildtype	DN119	4	L5	165076	27	163.561
Nrg1_wildtype	DN119	4	L6	208003	28	134.614
Nrg1_wildtype	DN119	4	Total	738377	92	124.598
Nrg1_wildtype	DN119	5	L1	63315	0	0
Nrg1_wildtype	DN119	5	L2_3	184330	17	92.2261
Nrg1_wildtype	DN119	5	L4	135060	25	185.103
Nrg1_wildtype	DN119	5	L5	159229	21	131.886
Nrg1_wildtype	DN119	5	L6	182016	19	104.387
Nrg1_wildtype	DN119	5	Total	723949	82	113.268
Nrg1_wildtype	DN119	6	L1	57029.4	0	0
Nrg1_wildtype	DN119	6	L2_3	174392	11	63.0764
Nrg1_wildtype	DN119	6	L4	129001	22	170.541
Nrg1_wildtype	DN119	6	L5	148058	19	128.328
Nrg1_wildtype	DN119	6	L6	175762	13	73.9636
Nrg1_wildtype	DN119	6	Total	684242	65	94.9956
Nrg1_wildtype	DN119	7	L1	52624	0	0
Nrg1_wildtype	DN119	7	L2_3	163159	17	104.193
Nrg1_wildtype	DN119	7	L4	125934	18	142.932
Nrg1_wildtype	DN119	7	L5	156726	22	140.372
Nrg1_wildtype	DN119	7	L6	197287	18	91.2379
Nrg1_wildtype	DN119	7	Total	695730	75	107.8
Nrg1_wildtype	DN119	8	L1	48650.1	0	0
Nrg1_wildtype	DN119	8	L2_3	160622	12	74.7095
Nrg1_wildtype	DN119	8	L4	135790	22	162.015
Nrg1_wildtype	DN119	8	L5	130636	19	145.442
Nrg1_wildtype	DN119	8	L6	165248	20	121.03
Nrg1_wildtype	DN119	8	Total	640946	73	113.894
Nrg1_wildtype	DN119	9	L1	52107.4	0	0
Nrg1_wildtype	DN119	9	L2_3	185163	16	86.4103
Nrg1_wildtype	DN119	9	L4	145145	32	220.47
Nrg1_wildtype	DN119	9	L5	155037	31	199.953
Nrg1_wildtype	DN119	9	L6	222551	22	98.854
Nrg1_wildtype	DN119	9	Total	760002	101	132.894
Nrg1_mutant	DN112	1	L1	70475.2	0	0
Nrg1_mutant	DN112	1	L2_3	192215	19	98.8475
Nrg1_mutant	DN112	1	L4	120333	19	157.895
Nrg1_mutant	DN112	1	L5	175735	29	165.022
Nrg1_mutant	DN112	1	L6	181857	15	82.4823
Nrg1_mutant	DN112	1	Total	740615	82	110.719
Nrg1_mutant	DN112	2	L1	52045.5	0	0
Nrg1_mutant	DN112	2	L2_3	180934	11	60.7955
Nrg1_mutant	DN112	2	L4	126304	29	229.605
Nrg1_mutant	DN112	2	L5	166194	29	174.495
Nrg1_mutant	DN112	2	L6	205161	25	121.856
Nrg1_mutant	DN112	2	Total	730638	94	128.655
Nrg1_mutant	DN112	3	L1	59935.7	0	0
Nrg1_mutant	DN112	3	L2_3	162475	11	67.7028
Nrg1_mutant	DN112	3	L4	122445	17	138.838
Nrg1_mutant	DN112	3	L5	167048	31	185.576
Nrg1_mutant	DN112	3	L6	204444	26	127.174
Nrg1_mutant	DN112	3	Total	716348	85	118.657
Nrg1_mutant	DN112	4	L1	62006.4	0	0
Nrg1_mutant	DN112	4	L2_3	162328	11	67.7641
Nrg1_mutant	DN112	4	L4	130824	19	145.233
Nrg1_mutant	DN112	4	L5	152534	24	157.342
Nrg1_mutant	DN112	4	L6	202615	20	98.7095
Nrg1_mutant	DN112	4	Total	710308	74	104.18
Nrg1_mutant	DN112	5	L1	54579.9	0	0
Nrg1_mutant	DN112	5	L2_3	163370	10	61.2107
Nrg1_mutant	DN112	5	L4	146738	27	184.002
Nrg1_mutant	DN112	5	L5	149167	23	154.19
Nrg1_mutant	DN112	5	L6	207739	19	91.461
Nrg1_mutant	DN112	5	Total	721593	79	109.48
Nrg1_mutant	DN112	6	L1	64104.7	0	0
Nrg1_mutant	DN112	6	L2_3	167624	8	47.7259
Nrg1_mutant	DN112	6	L4	133515	22	164.776
Nrg1_mutant	DN112	6	L5	148062	22	148.586
Nrg1_mutant	DN112	6	L6	185030	13	70.2589
Nrg1_mutant	DN112	6	Total	698336	65	93.0785
Nrg1_mutant	DN112	7	L1	53181.8	0	0
Nrg1_mutant	DN112	7	L2_3	149405	9	60.2388
Nrg1_mutant	DN112	7	L4	129040	19	147.241
Nrg1_mutant	DN112	7	L5	129658	17	131.114
Nrg1_mutant	DN112	7	L6	166646	17	102.013
Nrg1_mutant	DN112	7	Total	627932	62	98.7369
Nrg1_mutant	DN112	8	L1	57830.6	0	0
Nrg1_mutant	DN112	8	L2_3	166740	12	71.9683
Nrg1_mutant	DN112	8	L4	122736	25	203.688
Nrg1_mutant	DN112	8	L5	153115	19	124.09
Nrg1_mutant	DN112	8	L6	170124	21	123.439
Nrg1_mutant	DN112	8	Total	670546	77	114.832
Nrg1_mutant	DN112	9	L1	60782.8	0	0
Nrg1_mutant	DN112	9	L2_3	150799	10	66.3135
Nrg1_mutant	DN112	9	L4	107553	10	92.9776
Nrg1_mutant	DN112	9	L5	130280	18	138.164
Nrg1_mutant	DN112	9	L6	162858	10	61.4031
Nrg1_mutant	DN112	9	Total	612273	48	78.3964
Nrg1_mutant	DN114	1	L1	65555.6	0	0
Nrg1_mutant	DN114	1	L2_3	174376	15	86.0212
Nrg1_mutant	DN114	1	L4	101967	17	166.72
Nrg1_mutant	DN114	1	L5	145468	17	116.864
Nrg1_mutant	DN114	1	L6	189991	12	63.1609
Nrg1_mutant	DN114	1	Total	677358	61	90.0558
Nrg1_mutant	DN114	2	L1	63287.4	0	0
Nrg1_mutant	DN114	2	L2_3	162367	12	73.9067
Nrg1_mutant	DN114	2	L4	124440	25	200.9
Nrg1_mutant	DN114	2	L5	156143	28	179.323
Nrg1_mutant	DN114	2	L6	209146	20	95.627
Nrg1_mutant	DN114	2	Total	715383	85	118.817
Nrg1_mutant	DN114	3	L1	50557.9	0	0
Nrg1_mutant	DN114	3	L2_3	168494	14	83.089
Nrg1_mutant	DN114	3	L4	125895	21	166.805
Nrg1_mutant	DN114	3	L5	152121	24	157.769
Nrg1_mutant	DN114	3	L6	190953	17	89.0273
Nrg1_mutant	DN114	3	Total	688021	76	110.462
Nrg1_mutant	DN114	4	L1	52392.1	0	0
Nrg1_mutant	DN114	4	L2_3	152337	11	72.2083
Nrg1_mutant	DN114	4	L4	124045	17	137.047
Nrg1_mutant	DN114	4	L5	147172	17	115.511
Nrg1_mutant	DN114	4	L6	175064	20	114.244
Nrg1_mutant	DN114	4	Total	651010	65	99.8448
Nrg1_mutant	DN114	5	L1	45264	0	0
Nrg1_mutant	DN114	5	L2_3	150847	6	39.7754
Nrg1_mutant	DN114	5	L4	116481	18	154.532
Nrg1_mutant	DN114	5	L5	146109	25	171.105
Nrg1_mutant	DN114	5	L6	191921	16	83.3674
Nrg1_mutant	DN114	5	Total	650622	65	99.9044
Nrg1_mutant	DN114	6	L1	56558.8	0	0
Nrg1_mutant	DN114	6	L2_3	136341	14	102.684
Nrg1_mutant	DN114	6	L4	125202	20	159.742
Nrg1_mutant	DN114	6	L5	134766	16	118.724
Nrg1_mutant	DN114	6	L6	188788	11	58.2664
Nrg1_mutant	DN114	6	Total	641655	61	95.0666
Nrg1_mutant	DN114	7	L1	52605.6	0	0
Nrg1_mutant	DN114	7	L2_3	137773	10	72.5831
Nrg1_mutant	DN114	7	L4	107672	15	139.312
Nrg1_mutant	DN114	7	L5	126354	19	150.371
Nrg1_mutant	DN114	7	L6	162592	10	61.5037
Nrg1_mutant	DN114	7	Total	586997	54	91.9936
Nrg1_mutant	DN114	8	L1	58973.8	0	0
Nrg1_mutant	DN114	8	L2_3	134458	14	104.122
Nrg1_mutant	DN114	8	L4	117677	17	144.464
Nrg1_mutant	DN114	8	L5	131573	14	106.405
Nrg1_mutant	DN114	8	L6	195119	15	76.876
Nrg1_mutant	DN114	8	Total	637801	60	94.0733
Nrg1_mutant	DN114	9	L1	51834.3	0	0
Nrg1_mutant	DN114	9	L2_3	133632	11	82.3157
Nrg1_mutant	DN114	9	L4	95268.6	15	157.45
Nrg1_mutant	DN114	9	L5	112994	11	97.3507
Nrg1_mutant	DN114	9	L6	157365	13	82.6107
Nrg1_mutant	DN114	9	Total	551093	50	90.7288
Nrg1_mutant	DN117	1	L1	72451.8	0	0
Nrg1_mutant	DN117	1	L2_3	180243	23	127.605
Nrg1_mutant	DN117	1	L4	115822	23	198.581
Nrg1_mutant	DN117	1	L5	156304	26	166.343
Nrg1_mutant	DN117	1	L6	199286	15	75.2687
Nrg1_mutant	DN117	1	Total	724107	87	120.148
Nrg1_mutant	DN117	2	L1	56416.4	0	0
Nrg1_mutant	DN117	2	L2_3	176474	11	62.3322
Nrg1_mutant	DN117	2	L4	135829	18	132.52
Nrg1_mutant	DN117	2	L5	156882	16	101.987
Nrg1_mutant	DN117	2	L6	208111	18	86.4925
Nrg1_mutant	DN117	2	Total	733712	63	85.8647
Nrg1_mutant	DN117	3	L1	70553.3	0	0
Nrg1_mutant	DN117	3	L2_3	180953	18	99.4735
Nrg1_mutant	DN117	3	L4	124803	19	152.24
Nrg1_mutant	DN117	3	L5	176311	20	113.436
Nrg1_mutant	DN117	3	L6	195234	16	81.9529
Nrg1_mutant	DN117	3	Total	747854	73	97.6127
Nrg1_mutant	DN117	4	L1	61710.3	0	0
Nrg1_mutant	DN117	4	L2_3	191804	16	83.4183
Nrg1_mutant	DN117	4	L4	141240	18	127.443
Nrg1_mutant	DN117	4	L5	148414	16	107.807
Nrg1_mutant	DN117	4	L6	198556	23	115.836
Nrg1_mutant	DN117	4	Total	741724	73	98.4193
Nrg1_mutant	DN117	5	L1	52830.6	0	0
Nrg1_mutant	DN117	5	L2_3	176178	14	79.4652
Nrg1_mutant	DN117	5	L4	129217	19	147.039
Nrg1_mutant	DN117	5	L5	169151	33	195.092
Nrg1_mutant	DN117	5	L6	182746	18	98.4976
Nrg1_mutant	DN117	5	Total	710122	84	118.29
Nrg1_mutant	DN117	6	L1	55652	0	0
Nrg1_mutant	DN117	6	L2_3	168717	11	65.198
Nrg1_mutant	DN117	6	L4	141256	29	205.301
Nrg1_mutant	DN117	6	L5	146593	28	191.005
Nrg1_mutant	DN117	6	L6	197695	19	96.1076
Nrg1_mutant	DN117	6	Total	709913	87	122.55
Nrg1_mutant	DN117	7	L1	55989.4	0	0
Nrg1_mutant	DN117	7	L2_3	166736	11	65.9727
Nrg1_mutant	DN117	7	L4	140989	23	163.133
Nrg1_mutant	DN117	7	L5	177966	35	196.667
Nrg1_mutant	DN117	7	L6	179116	12	66.9956
Nrg1_mutant	DN117	7	Total	720797	81	112.376
Nrg1_mutant	DN117	8	L1	50137.7	0	0
Nrg1_mutant	DN117	8	L2_3	167300	10	59.7728
Nrg1_mutant	DN117	8	L4	115289	22	190.824
Nrg1_mutant	DN117	8	L5	145875	24	164.525
Nrg1_mutant	DN117	8	L6	198939	11	55.2932
Nrg1_mutant	DN117	8	Total	677541	67	98.887
Nrg1_mutant	DN117	9	L1	59561.5	0	0
Nrg1_mutant	DN117	9	L2_3	153115	10	65.3103
Nrg1_mutant	DN117	9	L4	134543	17	126.354
Nrg1_mutant	DN117	9	L5	135528	25	184.464
Nrg1_mutant	DN117	9	L6	173301	22	126.947
Nrg1_mutant	DN117	9	Total	656049	74	112.796
Nrg3_wildtype	DN93	1	L1	61609.3	0	0
Nrg3_wildtype	DN93	1	L2_3	196426	15	76.3648
Nrg3_wildtype	DN93	1	L4	142146	31	218.085
Nrg3_wildtype	DN93	1	L5	156235	20	128.012
Nrg3_wildtype	DN93	1	L6	229056	20	87.3147
Nrg3_wildtype	DN93	1	Total	785473	86	109.488
Nrg3_wildtype	DN93	2	L1	64742.9	0	0
Nrg3_wildtype	DN93	2	L2_3	219846	20	90.9727
Nrg3_wildtype	DN93	2	L4	103951	11	105.819
Nrg3_wildtype	DN93	2	L5	176185	12	68.1104
Nrg3_wildtype	DN93	2	L6	200824	11	54.7743
Nrg3_wildtype	DN93	2	Total	765549	54	70.5376
Nrg3_wildtype	DN93	3	L1	62096	0	0
Nrg3_wildtype	DN93	3	L2_3	193926	10	51.5662
Nrg3_wildtype	DN93	3	L4	120163	14	116.508
Nrg3_wildtype	DN93	3	L5	163565	21	128.389
Nrg3_wildtype	DN93	3	L6	213974	12	56.0816
Nrg3_wildtype	DN93	3	Total	753724	57	75.6245
Nrg3_wildtype	DN93	4	L1	63579	0	0
Nrg3_wildtype	DN93	4	L2_3	194286	18	92.6469
Nrg3_wildtype	DN93	4	L4	106552	20	187.702
Nrg3_wildtype	DN93	4	L5	176871	25	141.346
Nrg3_wildtype	DN93	4	L6	180197	13	72.1431
Nrg3_wildtype	DN93	4	Total	721485	76	105.338
Nrg3_wildtype	DN93	5	L1	62805.3	0	0
Nrg3_wildtype	DN93	5	L2_3	232764	14	60.1468
Nrg3_wildtype	DN93	5	L4	110034	18	163.585
Nrg3_wildtype	DN93	5	L5	175512	18	102.557
Nrg3_wildtype	DN93	5	L6	168907	12	71.0449
Nrg3_wildtype	DN93	5	Total	750023	62	82.6641
Nrg3_wildtype	DN93	6	L1	51783.7	0	0
Nrg3_wildtype	DN93	6	L2_3	167266	12	71.7421
Nrg3_wildtype	DN93	6	L4	98976.1	13	131.345
Nrg3_wildtype	DN93	6	L5	153039	26	169.891
Nrg3_wildtype	DN93	6	L6	211981	17	80.1958
Nrg3_wildtype	DN93	6	Total	683046	68	99.554
Nrg3_wildtype	DN93	7	L1	46795.2	0	0
Nrg3_wildtype	DN93	7	L2_3	157401	9	57.1787
Nrg3_wildtype	DN93	7	L4	105062	16	152.291
Nrg3_wildtype	DN93	7	L5	171478	20	116.633
Nrg3_wildtype	DN93	7	L6	185335	14	75.5388
Nrg3_wildtype	DN93	7	Total	666072	59	88.579
Nrg3_wildtype	DN93	8	L1	46478.4	0	0
Nrg3_wildtype	DN93	8	L2_3	153359	9	58.686
Nrg3_wildtype	DN93	8	L4	94788.8	13	137.147
Nrg3_wildtype	DN93	8	L5	134096	29	216.264
Nrg3_wildtype	DN93	8	L6	148730	14	94.13
Nrg3_wildtype	DN93	8	Total	577452	65	112.564
Nrg3_wildtype	DN94	1	L1	58909.6	0	0
Nrg3_wildtype	DN94	1	L2_3	180154	16	88.813
Nrg3_wildtype	DN94	1	L4	117243	25	213.233
Nrg3_wildtype	DN94	1	L5	149376	24	160.669
Nrg3_wildtype	DN94	1	L6	220815	18	81.5162
Nrg3_wildtype	DN94	1	Total	726497	83	114.247
Nrg3_wildtype	DN94	2	L1	55906.8	0	0
Nrg3_wildtype	DN94	2	L2_3	197032	13	65.9792
Nrg3_wildtype	DN94	2	L4	129444	20	154.506
Nrg3_wildtype	DN94	2	L5	169607	29	170.983
Nrg3_wildtype	DN94	2	L6	184851	16	86.5563
Nrg3_wildtype	DN94	2	Total	736841	78	105.857
Nrg3_wildtype	DN94	3	L1	63028	0	0
Nrg3_wildtype	DN94	3	L2_3	179139	16	89.3161
Nrg3_wildtype	DN94	3	L4	110331	19	172.21
Nrg3_wildtype	DN94	3	L5	135661	33	243.253
Nrg3_wildtype	DN94	3	L6	203680	13	63.8256
Nrg3_wildtype	DN94	3	Total	691839	81	117.079
Nrg3_wildtype	DN94	4	L1	49136.8	0	0
Nrg3_wildtype	DN94	4	L2_3	189656	16	84.3634
Nrg3_wildtype	DN94	4	L4	126621	22	173.747
Nrg3_wildtype	DN94	4	L5	179626	31	172.581
Nrg3_wildtype	DN94	4	L6	213499	13	60.8903
Nrg3_wildtype	DN94	4	Total	758538	82	108.103
Nrg3_wildtype	DN94	5	L1	63390.7	0	0
Nrg3_wildtype	DN94	5	L2_3	160285	14	87.3446
Nrg3_wildtype	DN94	5	L4	106651	10	93.7641
Nrg3_wildtype	DN94	5	L5	162298	18	110.907
Nrg3_wildtype	DN94	5	L6	150494	14	93.0272
Nrg3_wildtype	DN94	5	Total	643118	56	87.0758
Nrg3_wildtype	DN94	6	L1	57596.4	0	0
Nrg3_wildtype	DN94	6	L2_3	126387	5	39.5612
Nrg3_wildtype	DN94	6	L4	99710.7	16	160.464
Nrg3_wildtype	DN94	6	L5	126878	24	189.158
Nrg3_wildtype	DN94	6	L6	122121	12	98.263
Nrg3_wildtype	DN94	6	Total	532693	57	107.004
Nrg3_wildtype	DN94	7	L1	57022.5	0	0
Nrg3_wildtype	DN94	7	L2_3	152592	12	78.6412
Nrg3_wildtype	DN94	7	L4	129573	22	169.788
Nrg3_wildtype	DN94	7	L5	143361	21	146.483
Nrg3_wildtype	DN94	7	L6	169713	10	58.923
Nrg3_wildtype	DN94	7	Total	652261	65	99.6533
Nrg3_wildtype	DN94	8	L1	61951.3	0	0
Nrg3_wildtype	DN94	8	L2_3	144715	7	48.3708
Nrg3_wildtype	DN94	8	L4	107089	22	205.436
Nrg3_wildtype	DN94	8	L5	160944	22	136.694
Nrg3_wildtype	DN94	8	L6	133214	7	52.547
Nrg3_wildtype	DN94	8	Total	607913	58	95.4083
Nrg3_wildtype	DN95	1	L1	68202.5	0	0
Nrg3_wildtype	DN95	1	L2_3	177762	15	84.3826
Nrg3_wildtype	DN95	1	L4	100018	22	219.96
Nrg3_wildtype	DN95	1	L5	147603	14	94.8488
Nrg3_wildtype	DN95	1	L6	192817	19	98.5391
Nrg3_wildtype	DN95	1	Total	686403	70	101.981
Nrg3_wildtype	DN95	2	L1	59086.3	0	0
Nrg3_wildtype	DN95	2	L2_3	189594	12	63.2933
Nrg3_wildtype	DN95	2	L4	124112	14	112.802
Nrg3_wildtype	DN95	2	L5	165294	17	102.847
Nrg3_wildtype	DN95	2	L6	200333	19	94.8422
Nrg3_wildtype	DN95	2	Total	738418	62	83.9633
Nrg3_wildtype	DN95	3	L1	50303	0	0
Nrg3_wildtype	DN95	3	L2_3	196028	15	76.5195
Nrg3_wildtype	DN95	3	L4	98282.8	11	111.922
Nrg3_wildtype	DN95	3	L5	147727	20	135.385
Nrg3_wildtype	DN95	3	L6	199013	11	55.2728
Nrg3_wildtype	DN95	3	Total	691354	57	82.4468
Nrg3_wildtype	DN95	4	L1	55190.5	0	0
Nrg3_wildtype	DN95	4	L2_3	171894	9	52.3579
Nrg3_wildtype	DN95	4	L4	108237	22	203.258
Nrg3_wildtype	DN95	4	L5	155693	20	128.458
Nrg3_wildtype	DN95	4	L6	194759	16	82.1528
Nrg3_wildtype	DN95	4	Total	685774	67	97.6999
Nrg3_wildtype	DN95	5	L1	57667.6	0	0
Nrg3_wildtype	DN95	5	L2_3	183554	16	87.1679
Nrg3_wildtype	DN95	5	L4	120298	22	182.879
Nrg3_wildtype	DN95	5	L5	144438	20	138.468
Nrg3_wildtype	DN95	5	L6	181123	11	60.7323
Nrg3_wildtype	DN95	5	Total	687080	69	100.425
Nrg3_wildtype	DN95	6	L1	55775.9	0	0
Nrg3_wildtype	DN95	6	L2_3	175285	10	57.0501
Nrg3_wildtype	DN95	6	L4	115333	19	164.741
Nrg3_wildtype	DN95	6	L5	144008	17	118.049
Nrg3_wildtype	DN95	6	L6	182335	16	87.7507
Nrg3_wildtype	DN95	6	Total	672736	62	92.1609
Nrg3_wildtype	DN95	7	L1	49414.6	0	0
Nrg3_wildtype	DN95	7	L2_3	134011	9	67.1589
Nrg3_wildtype	DN95	7	L4	100207	20	199.588
Nrg3_wildtype	DN95	7	L5	128540	16	124.475
Nrg3_wildtype	DN95	7	L6	165211	8	48.4229
Nrg3_wildtype	DN95	7	Total	577383	53	91.7935
Nrg3_wildtype	DN95	8	L1	45881.5	0	0
Nrg3_wildtype	DN95	8	L2_3	138115	10	72.4033
Nrg3_wildtype	DN95	8	L4	106605	14	131.326
Nrg3_wildtype	DN95	8	L5	116559	8	68.6349
Nrg3_wildtype	DN95	8	L6	129337	6	46.3906
Nrg3_wildtype	DN95	8	Total	536497	38	70.8299
Nrg3_mutant	DN89	1	L1	65916	0	0
Nrg3_mutant	DN89	1	L2_3	172642	13	75.3002
Nrg3_mutant	DN89	1	L4	108625	22	202.532
Nrg3_mutant	DN89	1	L5	158887	25	157.345
Nrg3_mutant	DN89	1	L6	228056	13	57.0037
Nrg3_mutant	DN89	1	Total	734125	73	99.4381
Nrg3_mutant	DN89	2	L1	65640.5	0	0
Nrg3_mutant	DN89	2	L2_3	175106	9	51.3976
Nrg3_mutant	DN89	2	L4	128274	31	241.671
Nrg3_mutant	DN89	2	L5	166490	19	114.121
Nrg3_mutant	DN89	2	L6	226453	12	52.9911
Nrg3_mutant	DN89	2	Total	761963	71	93.1804
Nrg3_mutant	DN89	3	L1	65640.5	0	0
Nrg3_mutant	DN89	3	L2_3	196024	8	40.8114
Nrg3_mutant	DN89	3	L4	117002	18	153.844
Nrg3_mutant	DN89	3	L5	151265	24	158.662
Nrg3_mutant	DN89	3	L6	233090	14	60.0626
Nrg3_mutant	DN89	3	Total	763021	64	83.8771
Nrg3_mutant	DN89	4	L1	48494	0	0
Nrg3_mutant	DN89	4	L2_3	174954	14	80.021
Nrg3_mutant	DN89	4	L4	109642	17	155.05
Nrg3_mutant	DN89	4	L5	147870	26	175.831
Nrg3_mutant	DN89	4	L6	205585	13	63.2341
Nrg3_mutant	DN89	4	Total	686545	70	101.96
Nrg3_mutant	DN89	5	L1	49990.8	0	0
Nrg3_mutant	DN89	5	L2_3	163753	11	67.1742
Nrg3_mutant	DN89	5	L4	118923	15	126.132
Nrg3_mutant	DN89	5	L5	140379	20	142.472
Nrg3_mutant	DN89	5	L6	208623	14	67.1068
Nrg3_mutant	DN89	5	Total	681669	60	88.0193
Nrg3_mutant	DN89	6	L1	40463.7	0	0
Nrg3_mutant	DN89	6	L2_3	151908	10	65.8294
Nrg3_mutant	DN89	6	L4	99501.8	12	120.601
Nrg3_mutant	DN89	6	L5	140085	21	149.909
Nrg3_mutant	DN89	6	L6	185618	14	75.4239
Nrg3_mutant	DN89	6	Total	617576	57	92.2964
Nrg3_mutant	DN89	7	L1	47603.3	0	0
Nrg3_mutant	DN89	7	L2_3	69171.3	9	130.112
Nrg3_mutant	DN89	7	L4	133478	11	82.4106
Nrg3_mutant	DN89	7	L5	113852	13	114.183
Nrg3_mutant	DN89	7	L6	135168	13	96.1769
Nrg3_mutant	DN89	7	Total	499272	46	92.1341
Nrg3_mutant	DN89	8	L1	47842.1	0	0
Nrg3_mutant	DN89	8	L2_3	159013	8	50.3104
Nrg3_mutant	DN89	8	L4	108696	28	257.599
Nrg3_mutant	DN89	8	L5	146563	21	143.283
Nrg3_mutant	DN89	8	L6	216632	21	96.9385
Nrg3_mutant	DN89	8	Total	678747	78	114.918
Nrg3_mutant	DN90	1	L1	76584	0	0
Nrg3_mutant	DN90	1	L2_3	195253	18	92.1883
Nrg3_mutant	DN90	1	L4	112686	14	124.239
Nrg3_mutant	DN90	1	L5	208891	19	90.9565
Nrg3_mutant	DN90	1	L6	227326	23	101.176
Nrg3_mutant	DN90	1	Total	820739	74	90.1626
Nrg3_mutant	DN90	2	L1	60516.5	0	0
Nrg3_mutant	DN90	2	L2_3	226224	18	79.5673
Nrg3_mutant	DN90	2	L4	107165	22	205.291
Nrg3_mutant	DN90	2	L5	182580	28	153.357
Nrg3_mutant	DN90	2	L6	238444	27	113.234
Nrg3_mutant	DN90	2	Total	814929	95	116.575
Nrg3_mutant	DN90	3	L1	64954.1	0	0
Nrg3_mutant	DN90	3	L2_3	193882	16	82.5244
Nrg3_mutant	DN90	3	L4	128680	21	163.196
Nrg3_mutant	DN90	3	L5	173790	22	126.589
Nrg3_mutant	DN90	3	L6	207057	23	111.081
Nrg3_mutant	DN90	3	Total	768363	82	106.72
Nrg3_mutant	DN90	4	L1	52242.9	0	0
Nrg3_mutant	DN90	4	L2_3	206322	15	72.7018
Nrg3_mutant	DN90	4	L4	113648	27	237.576
Nrg3_mutant	DN90	4	L5	154653	28	181.05
Nrg3_mutant	DN90	4	L6	250925	24	95.6461
Nrg3_mutant	DN90	4	Total	777792	94	120.855
Nrg3_mutant	DN90	5	L1	62950	0	0
Nrg3_mutant	DN90	5	L2_3	165354	8	48.3812
Nrg3_mutant	DN90	5	L4	123161	23	186.747
Nrg3_mutant	DN90	5	L5	157585	12	76.1494
Nrg3_mutant	DN90	5	L6	205696	12	58.3386
Nrg3_mutant	DN90	5	Total	714745	55	76.9505
Nrg3_mutant	DN90	6	L1	53636.4	0	0
Nrg3_mutant	DN90	6	L2_3	153588	9	58.5983
Nrg3_mutant	DN90	6	L4	110932	17	153.247
Nrg3_mutant	DN90	6	L5	145927	21	143.907
Nrg3_mutant	DN90	6	L6	181586	14	77.0983
Nrg3_mutant	DN90	6	Total	645670	61	94.4755
Nrg3_mutant	DN90	7	L1	54903.6	0	0
Nrg3_mutant	DN90	7	L2_3	124396	11	88.4271
Nrg3_mutant	DN90	7	L4	86356.7	11	127.379
Nrg3_mutant	DN90	7	L5	121462	20	164.66
Nrg3_mutant	DN90	7	L6	109364	13	118.869
Nrg3_mutant	DN90	7	Total	496483	55	110.779
Nrg3_mutant	DN90	8	L1	52649.2	0	0
Nrg3_mutant	DN90	8	L2_3	146729	9	61.3377
Nrg3_mutant	DN90	8	L4	111292	18	161.736
Nrg3_mutant	DN90	8	L5	129157	16	123.88
Nrg3_mutant	DN90	8	L6	183384	16	87.2487
Nrg3_mutant	DN90	8	Total	623212	59	94.6709
Nrg3_mutant	DN96	1	L1	69513.3	0	0
Nrg3_mutant	DN96	1	L2_3	246825	11	44.566
Nrg3_mutant	DN96	1	L4	123880	18	145.302
Nrg3_mutant	DN96	1	L5	166912	23	137.797
Nrg3_mutant	DN96	1	L6	217831	18	82.633
Nrg3_mutant	DN96	1	Total	824961	70	84.8525
Nrg3_mutant	DN96	2	L1	40801.2	0	0
Nrg3_mutant	DN96	2	L2_3	193207	17	87.9885
Nrg3_mutant	DN96	2	L4	142525	25	175.408
Nrg3_mutant	DN96	2	L5	166129	23	138.446
Nrg3_mutant	DN96	2	L6	231598	13	56.1318
Nrg3_mutant	DN96	2	Total	774261	78	100.741
Nrg3_mutant	DN96	3	L1	51391.2	0	0
Nrg3_mutant	DN96	3	L2_3	166244	15	90.2287
Nrg3_mutant	DN96	3	L4	128549	22	171.141
Nrg3_mutant	DN96	3	L5	170014	20	117.638
Nrg3_mutant	DN96	3	L6	223969	21	93.7629
Nrg3_mutant	DN96	3	Total	740168	78	105.382
Nrg3_mutant	DN96	4	L1	41903.1	0	0
Nrg3_mutant	DN96	4	L2_3	186299	13	69.7802
Nrg3_mutant	DN96	4	L4	151263	29	191.72
Nrg3_mutant	DN96	4	L5	165723	19	114.649
Nrg3_mutant	DN96	4	L6	245466	13	52.9605
Nrg3_mutant	DN96	4	Total	790654	74	93.5934
Nrg3_mutant	DN96	5	L1	50821.9	0	0
Nrg3_mutant	DN96	5	L2_3	168898	10	59.2073
Nrg3_mutant	DN96	5	L4	118792	21	176.779
Nrg3_mutant	DN96	5	L5	166554	33	198.134
Nrg3_mutant	DN96	5	L6	193884	10	51.5772
Nrg3_mutant	DN96	5	Total	698951	74	105.873
Nrg3_mutant	DN96	6	L1	49476.6	0	0
Nrg3_mutant	DN96	6	L2_3	159933	7	43.7682
Nrg3_mutant	DN96	6	L4	138134	18	130.309
Nrg3_mutant	DN96	6	L5	167160	28	167.504
Nrg3_mutant	DN96	6	L6	243506	19	78.027
Nrg3_mutant	DN96	6	Total	758209	72	94.9606
Nrg3_mutant	DN96	7	L1	51368.2	0	0
Nrg3_mutant	DN96	7	L2_3	141901	9	63.4246
Nrg3_mutant	DN96	7	L4	112250	20	178.174
Nrg3_mutant	DN96	7	L5	127484	20	156.883
Nrg3_mutant	DN96	7	L6	131359	11	83.7399
Nrg3_mutant	DN96	7	Total	564362	60	106.315
Nrg3_mutant	DN96	8	L1	56600.1	0	0
Nrg3_mutant	DN96	8	L2_3	128572	12	93.3329
Nrg3_mutant	DN96	8	L4	84182.7	5	59.3946
Nrg3_mutant	DN96	8	L5	115179	21	182.325
Nrg3_mutant	DN96	8	L6	145390	12	82.5365
Nrg3_mutant	DN96	8	Total	529924	50	94.3531
Nrg3_mutant	DN96	9	L1	44791.1	0	0
Nrg3_mutant	DN96	9	L2_3	172645	13	75.2992
Nrg3_mutant	DN96	9	L4	130379	22	168.739
Nrg3_mutant	DN96	9	L5	177417	27	152.184
Nrg3_mutant	DN96	9	L6	216697	18	83.0655
Nrg3_mutant	DN96	9	Total	741928	80	107.827
Nrg3_wildtype	DN92	1	L1	48888.9	0	0
Nrg3_wildtype	DN92	1	L2_3	187022	13	69.5104
Nrg3_wildtype	DN92	1	L4	110762	17	153.482
Nrg3_wildtype	DN92	1	L5	157284	26	165.306
Nrg3_wildtype	DN92	1	L6	240298	28	116.522
Nrg3_wildtype	DN92	1	Total	744256	84	112.864
Nrg3_wildtype	DN92	2	L1	58124.4	0	0
Nrg3_wildtype	DN92	2	L2_3	180071	13	72.1937
Nrg3_wildtype	DN92	2	L4	111524	18	161.4
Nrg3_wildtype	DN92	2	L5	163067	32	196.238
Nrg3_wildtype	DN92	2	L6	219483	17	77.4546
Nrg3_wildtype	DN92	2	Total	732270	80	109.249
Nrg3_wildtype	DN92	3	L1	57160.2	0	0
Nrg3_wildtype	DN92	3	L2_3	166876	15	89.8873
Nrg3_wildtype	DN92	3	L4	125647	23	183.052
Nrg3_wildtype	DN92	3	L5	154787	34	219.657
Nrg3_wildtype	DN92	3	L6	206304	17	82.4027
Nrg3_wildtype	DN92	3	Total	710774	89	125.216
Nrg3_wildtype	DN92	4	L1	49655.6	0	0
Nrg3_wildtype	DN92	4	L2_3	180083	12	66.6361
Nrg3_wildtype	DN92	4	L4	127764	15	117.404
Nrg3_wildtype	DN92	4	L5	159846	34	212.704
Nrg3_wildtype	DN92	4	L6	212004	21	99.0547
Nrg3_wildtype	DN92	4	Total	729353	82	112.428
Nrg3_wildtype	DN92	5	L1	59832.4	0	0
Nrg3_wildtype	DN92	5	L2_3	193584	15	77.4859
Nrg3_wildtype	DN92	5	L4	122507	17	138.768
Nrg3_wildtype	DN92	5	L5	139479	28	200.747
Nrg3_wildtype	DN92	5	L6	201550	22	109.154
Nrg3_wildtype	DN92	5	Total	716951	82	114.373
Nrg3_wildtype	DN92	6	L1	47242.9	0	0
Nrg3_wildtype	DN92	6	L2_3	163809	14	85.4656
Nrg3_wildtype	DN92	6	L4	120126	20	166.491
Nrg3_wildtype	DN92	6	L5	151306	25	165.228
Nrg3_wildtype	DN92	6	L6	213701	17	79.5505
Nrg3_wildtype	DN92	6	Total	696185	76	109.166
Nrg3_wildtype	DN92	7	L1	62580.3	0	0
Nrg3_wildtype	DN92	7	L2_3	159401	10	62.7349
Nrg3_wildtype	DN92	7	L4	124500	22	176.707
Nrg3_wildtype	DN92	7	L5	147277	24	162.958
Nrg3_wildtype	DN92	7	L6	199355	19	95.3074
Nrg3_wildtype	DN92	7	Total	693113	75	108.207
Nrg3_wildtype	DN92	8	L1	48627.2	0	0
Nrg3_wildtype	DN92	8	L2_3	158831	13	81.8478
Nrg3_wildtype	DN92	8	L4	116814	16	136.97
Nrg3_wildtype	DN92	8	L5	153577	25	162.785
Nrg3_wildtype	DN92	8	L6	190606	18	94.4356
Nrg3_wildtype	DN92	8	Total	668455	72	107.711
Nrg3_wildtype	DN92	9	L1	48011.9	0	0
Nrg3_wildtype	DN92	9	L2_3	185606	14	75.4286
Nrg3_wildtype	DN92	9	L4	126139	20	158.556
Nrg3_wildtype	DN92	9	L5	150659	25	165.938
Nrg3_wildtype	DN92	9	L6	196855	22	111.757
Nrg3_wildtype	DN92	9	Total	707270	81	114.525
Nrg3_wildtype	DN99	1	L1	53746.6	0	0
Nrg3_wildtype	DN99	1	L2_3	225117	12	53.3056
Nrg3_wildtype	DN99	1	L4	134881	30	222.419
Nrg3_wildtype	DN99	1	L5	177461	20	112.701
Nrg3_wildtype	DN99	1	L6	228446	13	56.9063
Nrg3_wildtype	DN99	1	Total	819651	75	91.5024
Nrg3_wildtype	DN99	2	L1	59921.9	0	0
Nrg3_wildtype	DN99	2	L2_3	210544	21	99.7416
Nrg3_wildtype	DN99	2	L4	121258	27	222.666
Nrg3_wildtype	DN99	2	L5	182084	18	98.8552
Nrg3_wildtype	DN99	2	L6	217491	12	55.1747
Nrg3_wildtype	DN99	2	Total	791299	78	98.5721
Nrg3_wildtype	DN99	3	L1	46905.4	0	0
Nrg3_wildtype	DN99	3	L2_3	196552	17	86.4912
Nrg3_wildtype	DN99	3	L4	135595	22	162.248
Nrg3_wildtype	DN99	3	L5	176169	33	187.321
Nrg3_wildtype	DN99	3	L6	247732	21	84.7691
Nrg3_wildtype	DN99	3	Total	802952	93	115.823
Nrg3_wildtype	DN99	4	L1	64864.6	0	0
Nrg3_wildtype	DN99	4	L2_3	183177	19	103.725
Nrg3_wildtype	DN99	4	L4	114562	20	174.579
Nrg3_wildtype	DN99	4	L5	157693	15	95.1216
Nrg3_wildtype	DN99	4	L6	212436	26	122.39
Nrg3_wildtype	DN99	4	Total	732732	80	109.18
Nrg3_wildtype	DN99	5	L1	48154.3	0	0
Nrg3_wildtype	DN99	5	L2_3	166306	18	108.234
Nrg3_wildtype	DN99	5	L4	124371	15	120.607
Nrg3_wildtype	DN99	5	L5	139206	30	215.508
Nrg3_wildtype	DN99	5	L6	192920	14	72.5689
Nrg3_wildtype	DN99	5	Total	670957	77	114.761
Nrg3_wildtype	DN99	6	L1	50661.2	0	0
Nrg3_wildtype	DN99	6	L2_3	157938	14	88.6421
Nrg3_wildtype	DN99	6	L4	119607	15	125.41
Nrg3_wildtype	DN99	6	L5	140067	23	164.208
Nrg3_wildtype	DN99	6	L6	152284	15	98.5
Nrg3_wildtype	DN99	6	Total	620558	67	107.967
Nrg3_wildtype	DN99	7	L1	54882.9	0	0
Nrg3_wildtype	DN99	7	L2_3	150094	9	59.9624
Nrg3_wildtype	DN99	7	L4	97697.4	6	61.4141
Nrg3_wildtype	DN99	7	L5	132665	19	143.218
Nrg3_wildtype	DN99	7	L6	154881	11	71.0224
Nrg3_wildtype	DN99	7	Total	590220	45	76.2427
Nrg3_wildtype	DN99	8	L1	55307.6	0	0
Nrg3_wildtype	DN99	8	L2_3	126162	10	79.2634
Nrg3_wildtype	DN99	8	L4	100193	12	119.769
Nrg3_wildtype	DN99	8	L5	91680.4	22	239.964
Nrg3_wildtype	DN99	8	L6	141164	17	120.427
Nrg3_wildtype	DN99	8	Total	514506	61	118.56
Nrg3_wildtype	DN100	1	L1	65303	0	0
Nrg3_wildtype	DN100	1	L2_3	208104	16	76.8847
Nrg3_wildtype	DN100	1	L4	109506	21	191.77
Nrg3_wildtype	DN100	1	L5	143517	15	104.517
Nrg3_wildtype	DN100	1	L6	235893	29	122.937
Nrg3_wildtype	DN100	1	Total	762323	81	106.254
Nrg3_wildtype	DN100	2	L1	58223.1	0	0
Nrg3_wildtype	DN100	2	L2_3	221717	25	112.756
Nrg3_wildtype	DN100	2	L4	105055	19	180.857
Nrg3_wildtype	DN100	2	L5	172950	28	161.897
Nrg3_wildtype	DN100	2	L6	207704	14	67.4035
Nrg3_wildtype	DN100	2	Total	765650	86	112.323
Nrg3_wildtype	DN100	3	L1	64384.8	0	0
Nrg3_wildtype	DN100	3	L2_3	207792	12	57.7502
Nrg3_wildtype	DN100	3	L4	117043	18	153.789
Nrg3_wildtype	DN100	3	L5	163744	21	128.249
Nrg3_wildtype	DN100	3	L6	209399	12	57.307
Nrg3_wildtype	DN100	3	Total	762362	63	82.6379
Nrg3_wildtype	DN100	4	L1	67162.5	0	0
Nrg3_wildtype	DN100	4	L2_3	210996	15	71.0913
Nrg3_wildtype	DN100	4	L4	122190	21	171.863
Nrg3_wildtype	DN100	4	L5	157227	25	159.006
Nrg3_wildtype	DN100	4	L6	189320	13	68.6666
Nrg3_wildtype	DN100	4	Total	746896	74	99.0767
Nrg3_wildtype	DN100	5	L1	44816.3	0	0
Nrg3_wildtype	DN100	5	L2_3	228926	8	34.9459
Nrg3_wildtype	DN100	5	L4	133751	18	134.578
Nrg3_wildtype	DN100	5	L5	175941	12	68.2046
Nrg3_wildtype	DN100	5	L6	191219	15	78.4441
Nrg3_wildtype	DN100	5	Total	774653	53	68.4177
Nrg3_wildtype	DN100	6	L1	51310.8	0	0
Nrg3_wildtype	DN100	6	L2_3	193696	17	87.7664
Nrg3_wildtype	DN100	6	L4	122927	17	138.293
Nrg3_wildtype	DN100	6	L5	155539	30	192.877
Nrg3_wildtype	DN100	6	L6	200700	12	59.7907
Nrg3_wildtype	DN100	6	Total	724174	76	104.947
Nrg3_wildtype	DN100	7	L1	53158.9	0	0
Nrg3_wildtype	DN100	7	L2_3	194649	18	92.4743
Nrg3_wildtype	DN100	7	L4	130872	19	145.18
Nrg3_wildtype	DN100	7	L5	169993	29	170.595
Nrg3_wildtype	DN100	7	L6	192247	13	67.6212
Nrg3_wildtype	DN100	7	Total	740921	79	106.624
Nrg3_wildtype	DN100	8	L1	49125.3	0	0
Nrg3_wildtype	DN100	8	L2_3	153705	9	58.5536
Nrg3_wildtype	DN100	8	L4	100597	15	149.11
Nrg3_wildtype	DN100	8	L5	141804	20	141.039
Nrg3_wildtype	DN100	8	L6	175556	14	79.7468
Nrg3_wildtype	DN100	8	Total	620787	58	93.4297
Nrg3_wildtype	DN100	9	L1	45355.8	0	0
Nrg3_wildtype	DN100	9	L2_3	146809	11	74.9273
Nrg3_wildtype	DN100	9	L4	111120	14	125.99
Nrg3_wildtype	DN100	9	L5	165234	28	169.456
Nrg3_wildtype	DN100	9	L6	157332	10	63.5597
Nrg3_wildtype	DN100	9	Total	625852	63	100.663
Nrg3_mutant	DN91	1	L1	65284.7	0	0
Nrg3_mutant	DN91	1	L2_3	191134	14	73.247
Nrg3_mutant	DN91	1	L4	106775	22	206.042
Nrg3_mutant	DN91	1	L5	157365	35	222.413
Nrg3_mutant	DN91	1	L6	209415	21	100.28
Nrg3_mutant	DN91	1	Total	729972	92	126.032
Nrg3_mutant	DN91	2	L1	56427.9	0	0
Nrg3_mutant	DN91	2	L2_3	182208	9	49.394
Nrg3_mutant	DN91	2	L4	128487	20	155.658
Nrg3_mutant	DN91	2	L5	152491	23	150.829
Nrg3_mutant	DN91	2	L6	181706	17	93.5579
Nrg3_mutant	DN91	2	Total	701320	69	98.3859
Nrg3_mutant	DN91	3	L1	48996.8	0	0
Nrg3_mutant	DN91	3	L2_3	185624	11	59.2594
Nrg3_mutant	DN91	3	L4	115597	16	138.412
Nrg3_mutant	DN91	3	L5	156485	22	140.588
Nrg3_mutant	DN91	3	L6	181017	18	99.4382
Nrg3_mutant	DN91	3	Total	687720	67	97.4233
Nrg3_mutant	DN91	4	L1	50762.2	0	0
Nrg3_mutant	DN91	4	L2_3	207022	17	82.1167
Nrg3_mutant	DN91	4	L4	107264	20	186.457
Nrg3_mutant	DN91	4	L5	164626	29	176.157
Nrg3_mutant	DN91	4	L6	184715	22	119.102
Nrg3_mutant	DN91	4	Total	714389	88	123.182
Nrg3_mutant	DN91	5	L1	52908.6	0	0
Nrg3_mutant	DN91	5	L2_3	152121	16	105.179
Nrg3_mutant	DN91	5	L4	124743	21	168.346
Nrg3_mutant	DN91	5	L5	155062	24	154.777
Nrg3_mutant	DN91	5	L6	195370	12	61.422
Nrg3_mutant	DN91	5	Total	680204	73	107.321
Nrg3_mutant	DN91	6	L1	55287	0	0
Nrg3_mutant	DN91	6	L2_3	162883	9	55.2543
Nrg3_mutant	DN91	6	L4	139017	24	172.64
Nrg3_mutant	DN91	6	L5	127741	23	180.052
Nrg3_mutant	DN91	6	L6	191515	16	83.5443
Nrg3_mutant	DN91	6	Total	676444	72	106.439
Nrg3_mutant	DN91	7	L1	40578.5	0	0
Nrg3_mutant	DN91	7	L2_3	164197	9	54.8124
Nrg3_mutant	DN91	7	L4	103432	16	154.691
Nrg3_mutant	DN91	7	L5	149963	26	173.376
Nrg3_mutant	DN91	7	L6	168981	11	65.0962
Nrg3_mutant	DN91	7	Total	627151	62	98.8598
Nrg3_mutant	DN91	8	L1	54134.5	0	0
Nrg3_mutant	DN91	8	L2_3	161180	15	93.0637
Nrg3_mutant	DN91	8	L4	116770	13	111.33
Nrg3_mutant	DN91	8	L5	142420	26	182.559
Nrg3_mutant	DN91	8	L6	192629	21	109.018
Nrg3_mutant	DN91	8	Total	667133	75	112.421
Nrg3_mutant	DN91	9	L1	47566.6	0	0
Nrg3_mutant	DN91	9	L2_3	151315	12	79.3045
Nrg3_mutant	DN91	9	L4	121042	21	173.493
Nrg3_mutant	DN91	9	L5	144642	29	200.495
Nrg3_mutant	DN91	9	L6	165455	14	84.6154
Nrg3_mutant	DN91	9	Total	630021	76	120.631
Nrg3_mutant	DN97	1	L1	78992.2	0	0
Nrg3_mutant	DN97	1	L2_3	201260	16	79.499
Nrg3_mutant	DN97	1	L4	129431	24	185.427
Nrg3_mutant	DN97	1	L5	173611	28	161.28
Nrg3_mutant	DN97	1	L6	208377	22	105.578
Nrg3_mutant	DN97	1	Total	791671	90	113.684
Nrg3_mutant	DN97	2	L1	61926.1	0	0
Nrg3_mutant	DN97	2	L2_3	191267	15	78.4243
Nrg3_mutant	DN97	2	L4	123843	24	193.794
Nrg3_mutant	DN97	2	L5	167870	29	172.753
Nrg3_mutant	DN97	2	L6	225381	22	97.6124
Nrg3_mutant	DN97	2	Total	770287	90	116.84
Nrg3_mutant	DN97	3	L1	56639.1	0	0
Nrg3_mutant	DN97	3	L2_3	177771	16	90.0035
Nrg3_mutant	DN97	3	L4	123388	28	226.926
Nrg3_mutant	DN97	3	L5	178404	25	140.131
Nrg3_mutant	DN97	3	L6	201781	24	118.941
Nrg3_mutant	DN97	3	Total	737984	93	126.019
Nrg3_mutant	DN97	4	L1	54396.2	0	0
Nrg3_mutant	DN97	4	L2_3	200230	14	69.9197
Nrg3_mutant	DN97	4	L4	128510	19	147.848
Nrg3_mutant	DN97	4	L5	184525	35	189.676
Nrg3_mutant	DN97	4	L6	178664	19	106.345
Nrg3_mutant	DN97	4	Total	746325	87	116.571
Nrg3_mutant	DN97	5	L1	58496.3	0	0
Nrg3_mutant	DN97	5	L2_3	185402	11	59.3306
Nrg3_mutant	DN97	5	L4	130232	22	168.929
Nrg3_mutant	DN97	5	L5	157638	27	171.279
Nrg3_mutant	DN97	5	L6	198850	19	95.5495
Nrg3_mutant	DN97	5	Total	730618	79	108.128
Nrg3_mutant	DN97	6	L1	61512.9	0	0
Nrg3_mutant	DN97	6	L2_3	213586	26	121.731
Nrg3_mutant	DN97	6	L4	108356	23	212.263
Nrg3_mutant	DN97	6	L5	142250	29	203.867
Nrg3_mutant	DN97	6	L6	201827	21	104.049
Nrg3_mutant	DN97	6	Total	727532	99	136.076
Nrg3_mutant	DN97	7	L1	54609.7	0	0
Nrg3_mutant	DN97	7	L2_3	170060	11	64.6832
Nrg3_mutant	DN97	7	L4	111758	20	178.957
Nrg3_mutant	DN97	7	L5	154998	32	206.455
Nrg3_mutant	DN97	7	L6	173698	20	115.142
Nrg3_mutant	DN97	7	Total	665124	83	124.789
Nrg3_mutant	DN97	8	L1	50982.6	0	0
Nrg3_mutant	DN97	8	L2_3	147388	11	74.6332
Nrg3_mutant	DN97	8	L4	104300	23	220.518
Nrg3_mutant	DN97	8	L5	127631	25	195.877
Nrg3_mutant	DN97	8	L6	152658	15	98.2586
Nrg3_mutant	DN97	8	Total	582959	74	126.939
Nrg3_mutant	DN97	9	L1	58941.7	0	0
Nrg3_mutant	DN97	9	L2_3	188744	10	52.9817
Nrg3_mutant	DN97	9	L4	120021	23	191.634
Nrg3_mutant	DN97	9	L5	165999	24	144.58
Nrg3_mutant	DN97	9	L6	205051	22	107.291
Nrg3_mutant	DN97	9	Total	738756	79	106.937
Nrg3_mutant	DN98	1	L1	59779.6	0	0
Nrg3_mutant	DN98	1	L2_3	179780	14	77.8731
Nrg3_mutant	DN98	1	L4	124697	19	152.369
Nrg3_mutant	DN98	1	L5	161077	18	111.748
Nrg3_mutant	DN98	1	L6	210220	12	57.0829
Nrg3_mutant	DN98	1	Total	735553	63	85.6498
Nrg3_mutant	DN98	2	L1	51627.6	0	0
Nrg3_mutant	DN98	2	L2_3	171260	11	64.2297
Nrg3_mutant	DN98	2	L4	127532	23	180.347
Nrg3_mutant	DN98	2	L5	167603	32	190.927
Nrg3_mutant	DN98	2	L6	196635	15	76.2836
Nrg3_mutant	DN98	2	Total	714658	81	113.341
Nrg3_mutant	DN98	3	L1	48342.5	0	0
Nrg3_mutant	DN98	3	L2_3	182025	7	38.4563
Nrg3_mutant	DN98	3	L4	126247	21	166.341
Nrg3_mutant	DN98	3	L5	159268	25	156.968
Nrg3_mutant	DN98	3	L6	212677	21	98.7414
Nrg3_mutant	DN98	3	Total	728558	74	101.57
Nrg3_mutant	DN98	4	L1	53654.7	0	0
Nrg3_mutant	DN98	4	L2_3	181832	15	82.4938
Nrg3_mutant	DN98	4	L4	128207	21	163.798
Nrg3_mutant	DN98	4	L5	140565	25	177.854
Nrg3_mutant	DN98	4	L6	194594	10	51.3891
Nrg3_mutant	DN98	4	Total	698852	71	101.595
Nrg3_mutant	DN98	5	L1	45608.4	0	0
Nrg3_mutant	DN98	5	L2_3	135638	6	44.2353
Nrg3_mutant	DN98	5	L4	123655	20	161.741
Nrg3_mutant	DN98	5	L5	140831	20	142.014
Nrg3_mutant	DN98	5	L6	167739	14	83.4631
Nrg3_mutant	DN98	5	Total	613471	60	97.8041
Nrg3_mutant	DN98	6	L1	54334.3	0	0
Nrg3_mutant	DN98	6	L2_3	142819	10	70.0186
Nrg3_mutant	DN98	6	L4	101313	15	148.056
Nrg3_mutant	DN98	6	L5	132247	21	158.793
Nrg3_mutant	DN98	6	L6	140452	15	106.798
Nrg3_mutant	DN98	6	Total	571166	61	106.799
Nrg3_mutant	DN98	7	L1	56320	0	0
Nrg3_mutant	DN98	7	L2_3	124167	8	64.4295
Nrg3_mutant	DN98	7	L4	105328	18	170.894
Nrg3_mutant	DN98	7	L5	109353	18	164.605
Nrg3_mutant	DN98	7	L6	149899	10	66.7116
Nrg3_mutant	DN98	7	Total	545067	54	99.0705
Nrg3_mutant	DN98	8	L1	43902.7	0	0
Nrg3_mutant	DN98	8	L2_3	134851	9	66.7404
Nrg3_mutant	DN98	8	L4	116084	19	163.675
Nrg3_mutant	DN98	8	L5	105119	13	123.669
Nrg3_mutant	DN98	8	L6	127899	9	70.3678
Nrg3_mutant	DN98	8	Total	527856	50	94.7228
