# Supplementary material for: Subcellular sorting of neuregulins controls the assembly of excitatory-inhibitory cortical circuits
Source: eLife. 2020 Dec 15;9:e57000. doi: 10.7554/eLife.57000 (PMC7755390; doi:10.7554/eLife.57000)
Supplement: Figure 1—figure supplement 3—source data 1. [file elife-57000-fig1-figsupp3-data1.xlsx]

## Sheet: Proportion_cb1r_gad65
Genotype	Brain	Cell	Count_gad65	Count_cb1r	Count_cb1r_gad65	Proportion_cb1r_gad65	Area_field
Nrg1_wildtype	DN104	1	864	299	213	0.712375	2792.07
Nrg1_wildtype	DN104	2	837	202	137	0.678218	2792.07
Nrg1_wildtype	DN104	3	852	232	163	0.702586	2792.07
Nrg1_wildtype	DN104	4	811	208	153	0.735577	2792.07
Nrg1_wildtype	DN104	5	804	257	169	0.657588	2792.07
Nrg1_wildtype	DN104	6	810	197	148	0.751269	2792.07
Nrg1_wildtype	DN104	7	885	273	192	0.703297	2792.07
Nrg1_wildtype	DN104	8	838	205	153	0.746341	2792.07
Nrg1_wildtype	DN104	9	854	240	165	0.6875	2792.07
Nrg1_wildtype	DN104	10	768	243	169	0.695473	2792.07
Nrg1_wildtype	DN105	1	900	292	221	0.756849	2792.07
Nrg1_wildtype	DN105	2	843	279	205	0.734767	2792.07
Nrg1_wildtype	DN105	3	792	263	161	0.612167	2792.07
Nrg1_wildtype	DN105	4	823	250	175	0.7	2792.07
Nrg1_wildtype	DN105	5	852	252	153	0.607143	2792.07
Nrg1_wildtype	DN105	6	836	228	171	0.75	2792.07
Nrg1_wildtype	DN105	7	824	183	155	0.846995	2792.07
Nrg1_wildtype	DN105	8	774	270	188	0.696296	2792.07
Nrg1_wildtype	DN105	9	827	239	145	0.606695	2792.07
Nrg1_wildtype	DN105	10	842	211	170	0.805687	2792.07
Nrg1_wildtype	DN111	1	854	273	207	0.758242	2792.07
Nrg1_wildtype	DN111	2	825	295	167	0.566102	2792.07
Nrg1_wildtype	DN111	3	860	304	168	0.552632	2792.07
Nrg1_wildtype	DN111	4	841	270	144	0.533333	2792.07
Nrg1_wildtype	DN111	5	886	321	199	0.619938	2792.07
Nrg1_wildtype	DN111	6	842	301	208	0.69103	2792.07
Nrg1_wildtype	DN111	7	861	317	172	0.542587	2792.07
Nrg1_wildtype	DN111	8	845	239	136	0.569038	2792.07
Nrg1_wildtype	DN111	9	866	252	166	0.65873	2792.07
Nrg1_wildtype	DN111	10	817	250	170	0.68	2792.07
Nrg1_wildtype	DN113	1	809	276	168	0.608696	2792.07
Nrg1_wildtype	DN113	2	826	235	153	0.651064	2792.07
Nrg1_wildtype	DN113	3	783	256	166	0.648438	2792.07
Nrg1_wildtype	DN113	4	820	236	131	0.555085	2792.07
Nrg1_wildtype	DN113	5	845	256	166	0.648438	2792.07
Nrg1_wildtype	DN113	6	796	215	155	0.72093	2792.07
Nrg1_wildtype	DN113	7	790	226	158	0.699115	2792.07
Nrg1_wildtype	DN113	8	823	278	216	0.776978	2792.07
Nrg1_wildtype	DN113	9	818	195	160	0.820513	2792.07
Nrg1_wildtype	DN113	10	801	311	194	0.623794	2792.07
Nrg1_mutant	DN106	1	818	247	199	0.805668	2792.07
Nrg1_mutant	DN106	2	845	270	174	0.644444	2792.07
Nrg1_mutant	DN106	3	789	202	155	0.767327	2792.07
Nrg1_mutant	DN106	4	803	223	155	0.695067	2792.07
Nrg1_mutant	DN106	5	817	219	166	0.757991	2792.07
Nrg1_mutant	DN106	6	776	246	195	0.792683	2792.07
Nrg1_mutant	DN106	7	787	188	138	0.734043	2792.07
Nrg1_mutant	DN106	8	851	282	185	0.656028	2792.07
Nrg1_mutant	DN106	9	823	256	164	0.640625	2792.07
Nrg1_mutant	DN106	10	780	230	170	0.73913	2792.07
Nrg1_mutant	DN107	1	831	257	188	0.731518	2792.07
Nrg1_mutant	DN107	2	786	274	188	0.686131	2792.07
Nrg1_mutant	DN107	3	819	236	155	0.65678	2792.07
Nrg1_mutant	DN107	4	835	206	137	0.665049	2792.07
Nrg1_mutant	DN107	5	819	240	164	0.683333	2792.07
Nrg1_mutant	DN107	6	819	187	151	0.807487	2792.07
Nrg1_mutant	DN107	7	882	253	189	0.747036	2792.07
Nrg1_mutant	DN107	8	797	204	167	0.818627	2792.07
Nrg1_mutant	DN107	9	836	234	158	0.675214	2792.07
Nrg1_mutant	DN107	10	786	229	172	0.751092	2792.07
Nrg1_mutant	DN112	1	824	273	182	0.666667	2792.07
Nrg1_mutant	DN112	2	820	231	143	0.619048	2792.07
Nrg1_mutant	DN112	3	832	266	172	0.646617	2792.07
Nrg1_mutant	DN112	4	784	211	144	0.682464	2792.07
Nrg1_mutant	DN112	5	847	243	175	0.720165	2792.07
Nrg1_mutant	DN112	6	873	281	186	0.661922	2792.07
Nrg1_mutant	DN112	7	810	223	152	0.681614	2792.07
Nrg1_mutant	DN112	8	838	223	152	0.681614	2792.07
Nrg1_mutant	DN112	9	771	186	140	0.752688	2792.07
Nrg1_mutant	DN112	10	826	207	161	0.777778	2792.07
Nrg1_mutant	DN117	1	781	239	169	0.707113	2792.07
Nrg1_mutant	DN117	2	824	305	180	0.590164	2792.07
Nrg1_mutant	DN117	3	806	288	198	0.6875	2792.07
Nrg1_mutant	DN117	4	823	311	178	0.572347	2792.07
Nrg1_mutant	DN117	5	790	292	172	0.589041	2792.07
Nrg1_mutant	DN117	6	762	244	179	0.733607	2792.07
Nrg1_mutant	DN117	7	754	242	153	0.632231	2792.07
Nrg1_mutant	DN117	8	763	236	182	0.771186	2792.07
Nrg1_mutant	DN117	9	803	222	183	0.824324	2792.07
Nrg1_mutant	DN117	10	766	234	163	0.696581	2792.07
Nrg3_wildtype	DN93	1	870	297	165	0.555556	2792.07
Nrg3_wildtype	DN93	2	881	298	185	0.620805	2792.07
Nrg3_wildtype	DN93	3	857	309	187	0.605178	2792.07
Nrg3_wildtype	DN93	4	909	353	192	0.543909	2792.07
Nrg3_wildtype	DN93	5	834	282	183	0.648936	2792.07
Nrg3_wildtype	DN93	6	857	307	198	0.644951	2792.07
Nrg3_wildtype	DN93	7	895	191	113	0.591623	2792.07
Nrg3_wildtype	DN93	8	904	265	190	0.716981	2792.07
Nrg3_wildtype	DN93	9	884	323	169	0.52322	2792.07
Nrg3_wildtype	DN93	10	875	321	178	0.554517	2792.07
Nrg3_wildtype	DN94	1	899	341	204	0.59824	2792.07
Nrg3_wildtype	DN94	2	884	331	212	0.640483	2792.07
Nrg3_wildtype	DN94	3	887	270	167	0.618519	2792.07
Nrg3_wildtype	DN94	4	915	301	173	0.574751	2792.07
Nrg3_wildtype	DN94	5	825	264	179	0.67803	2792.07
Nrg3_wildtype	DN94	6	872	308	189	0.613636	2792.07
Nrg3_wildtype	DN94	7	881	256	162	0.632812	2792.07
Nrg3_wildtype	DN94	8	892	307	197	0.641694	2792.07
Nrg3_wildtype	DN94	9	866	265	169	0.637736	2792.07
Nrg3_wildtype	DN94	10	818	305	160	0.52459	2792.07
Nrg3_wildtype	DN95	1	937	320	185	0.578125	2792.07
Nrg3_wildtype	DN95	2	863	224	131	0.584821	2792.07
Nrg3_wildtype	DN95	3	880	229	161	0.703057	2792.07
Nrg3_wildtype	DN95	4	880	306	194	0.633987	2792.07
Nrg3_wildtype	DN95	5	839	221	161	0.728507	2792.07
Nrg3_wildtype	DN95	6	880	263	181	0.688213	2792.07
Nrg3_wildtype	DN95	7	867	267	179	0.670412	2792.07
Nrg3_wildtype	DN95	8	851	310	202	0.651613	2792.07
Nrg3_wildtype	DN95	9	844	226	170	0.752212	2792.07
Nrg3_wildtype	DN95	10	871	223	150	0.672646	2792.07
Nrg3_wildtype	DN92	1	863	269	216	0.802974	2792.07
Nrg3_wildtype	DN92	2	831	255	151	0.592157	2792.07
Nrg3_wildtype	DN92	3	848	271	201	0.741697	2792.07
Nrg3_wildtype	DN92	4	832	263	159	0.604563	2792.07
Nrg3_wildtype	DN92	5	869	268	190	0.708955	2792.07
Nrg3_wildtype	DN92	6	924	269	197	0.732342	2792.07
Nrg3_wildtype	DN92	7	882	262	182	0.694656	2792.07
Nrg3_wildtype	DN92	8	871	264	179	0.67803	2792.07
Nrg3_wildtype	DN92	9	859	292	191	0.65411	2792.07
Nrg3_wildtype	DN92	10	775	282	213	0.755319	2792.07
Nrg3_mutant	DN89	1	881	302	195	0.645695	2792.07
Nrg3_mutant	DN89	2	972	340	198	0.582353	2792.07
Nrg3_mutant	DN89	3	844	271	188	0.693727	2792.07
Nrg3_mutant	DN89	4	835	230	171	0.743478	2792.07
Nrg3_mutant	DN89	5	848	306	189	0.617647	2792.07
Nrg3_mutant	DN89	6	875	296	161	0.543919	2792.07
Nrg3_mutant	DN89	7	888	241	147	0.609959	2792.07
Nrg3_mutant	DN89	8	935	317	219	0.690852	2792.07
Nrg3_mutant	DN89	9	866	265	175	0.660377	2792.07
Nrg3_mutant	DN89	10	817	230	162	0.704348	2792.07
Nrg3_mutant	DN90	1	847	240	155	0.645833	2792.07
Nrg3_mutant	DN90	2	927	285	192	0.673684	2792.07
Nrg3_mutant	DN90	3	835	264	177	0.670455	2792.07
Nrg3_mutant	DN90	4	905	279	199	0.713262	2792.07
Nrg3_mutant	DN90	5	904	292	190	0.650685	2792.07
Nrg3_mutant	DN90	6	829	284	180	0.633803	2792.07
Nrg3_mutant	DN90	7	913	266	160	0.601504	2792.07
Nrg3_mutant	DN90	8	930	301	175	0.581395	2792.07
Nrg3_mutant	DN90	9	885	339	206	0.60767	2792.07
Nrg3_mutant	DN90	10	871	320	162	0.50625	2792.07
Nrg3_mutant	DN96	1	827	248	176	0.709677	2792.07
Nrg3_mutant	DN96	2	926	304	187	0.615132	2792.07
Nrg3_mutant	DN96	3	909	273	176	0.644689	2792.07
Nrg3_mutant	DN96	4	909	258	153	0.593023	2792.07
Nrg3_mutant	DN96	5	832	276	189	0.684783	2792.07
Nrg3_mutant	DN96	6	914	291	211	0.725086	2792.07
Nrg3_mutant	DN96	7	828	273	182	0.666667	2792.07
Nrg3_mutant	DN96	8	904	302	174	0.576159	2792.07
Nrg3_mutant	DN96	9	807	246	187	0.760163	2792.07
Nrg3_mutant	DN96	10	857	231	149	0.645022	2792.07
Nrg3_mutant	DN91	1	917	249	181	0.726908	2792.07
Nrg3_mutant	DN91	2	914	283	206	0.727915	2792.07
Nrg3_mutant	DN91	3	901	258	204	0.790698	2792.07
Nrg3_mutant	DN91	4	920	283	180	0.636042	2792.07
Nrg3_mutant	DN91	5	941	250	176	0.704	2792.07
Nrg3_mutant	DN91	6	899	220	183	0.831818	2792.07
Nrg3_mutant	DN91	7	845	196	149	0.760204	2792.07
Nrg3_mutant	DN91	8	833	242	170	0.702479	2792.07
Nrg3_mutant	DN91	9	751	228	188	0.824561	2792.07
Nrg3_mutant	DN91	10	829	201	157	0.781095	2792.07

## Sheet: Proportion_syt2_geph
Genotype	Brain	Cell	Count_syt2	Count_geph	Count_syt2_geph	Proportion_syt2_geph	Area_field
Nrg1_wildtype	DN104	1	500	861	224	0.448	2792.07
Nrg1_wildtype	DN104	2	402	753	183	0.455224	2792.07
Nrg1_wildtype	DN104	3	465	748	202	0.434409	2792.07
Nrg1_wildtype	DN104	4	414	774	187	0.451691	2792.07
Nrg1_wildtype	DN104	5	392	721	167	0.42602	2792.07
Nrg1_wildtype	DN104	6	413	738	129	0.312349	2792.07
Nrg1_wildtype	DN104	7	410	758	166	0.404878	2792.07
Nrg1_wildtype	DN104	8	476	827	244	0.512605	2792.07
Nrg1_wildtype	DN104	9	401	690	132	0.329177	2792.07
Nrg1_wildtype	DN104	10	383	674	165	0.430809	2792.07
Nrg1_wildtype	DN105	1	398	798	209	0.525126	2792.07
Nrg1_wildtype	DN105	2	369	817	162	0.439024	2792.07
Nrg1_wildtype	DN105	3	384	796	212	0.552083	2792.07
Nrg1_wildtype	DN105	4	393	750	200	0.508906	2792.07
Nrg1_wildtype	DN105	5	432	687	161	0.372685	2792.07
Nrg1_wildtype	DN105	6	366	676	172	0.469945	2792.07
Nrg1_wildtype	DN105	7	386	529	125	0.323834	2792.07
Nrg1_wildtype	DN105	8	437	730	208	0.475973	2792.07
Nrg1_wildtype	DN105	9	448	606	146	0.325893	2792.07
Nrg1_wildtype	DN105	10	403	578	164	0.406948	2792.07
Nrg1_wildtype	DN111	1	419	763	241	0.575179	2792.07
Nrg1_wildtype	DN111	2	432	885	281	0.650463	2792.07
Nrg1_wildtype	DN111	3	424	858	283	0.667453	2792.07
Nrg1_wildtype	DN111	4	434	917	263	0.605991	2792.07
Nrg1_wildtype	DN111	5	383	857	250	0.652742	2792.07
Nrg1_wildtype	DN111	6	469	859	247	0.526652	2792.07
Nrg1_wildtype	DN111	7	404	793	232	0.574257	2792.07
Nrg1_wildtype	DN111	8	420	969	280	0.666667	2792.07
Nrg1_wildtype	DN111	9	463	842	249	0.537797	2792.07
Nrg1_wildtype	DN111	10	390	851	251	0.64359	2792.07
Nrg1_wildtype	DN113	1	490	786	206	0.420408	2792.07
Nrg1_wildtype	DN113	2	405	760	205	0.506173	2792.07
Nrg1_wildtype	DN113	3	392	806	209	0.533163	2792.07
Nrg1_wildtype	DN113	4	385	774	223	0.579221	2792.07
Nrg1_wildtype	DN113	5	410	906	310	0.756098	2792.07
Nrg1_wildtype	DN113	6	403	884	248	0.615385	2792.07
Nrg1_wildtype	DN113	7	405	697	193	0.476543	2792.07
Nrg1_wildtype	DN113	8	430	774	223	0.518605	2792.07
Nrg1_wildtype	DN113	9	395	797	239	0.605063	2792.07
Nrg1_wildtype	DN113	10	439	741	219	0.498861	2792.07
Nrg1_mutant	DN106	1	427	822	172	0.40281	2792.07
Nrg1_mutant	DN106	2	393	894	199	0.506361	2792.07
Nrg1_mutant	DN106	3	423	839	212	0.501182	2792.07
Nrg1_mutant	DN106	4	401	868	240	0.598504	2792.07
Nrg1_mutant	DN106	5	403	862	253	0.627792	2792.07
Nrg1_mutant	DN106	6	405	876	262	0.646914	2792.07
Nrg1_mutant	DN106	7	413	717	173	0.418886	2792.07
Nrg1_mutant	DN106	8	402	865	252	0.626866	2792.07
Nrg1_mutant	DN106	9	439	681	172	0.3918	2792.07
Nrg1_mutant	DN106	10	407	691	167	0.410319	2792.07
Nrg1_mutant	DN107	1	407	855	221	0.542998	2792.07
Nrg1_mutant	DN107	2	427	882	198	0.4637	2792.07
Nrg1_mutant	DN107	3	431	788	215	0.49884	2792.07
Nrg1_mutant	DN107	4	409	932	225	0.550122	2792.07
Nrg1_mutant	DN107	5	429	864	251	0.585082	2792.07
Nrg1_mutant	DN107	6	389	711	110	0.282776	2792.07
Nrg1_mutant	DN107	7	398	803	193	0.484925	2792.07
Nrg1_mutant	DN107	8	397	639	121	0.304786	2792.07
Nrg1_mutant	DN107	9	442	780	202	0.457014	2792.07
Nrg1_mutant	DN107	10	428	792	162	0.378505	2792.07
Nrg1_mutant	DN112	1	409	834	213	0.520782	2792.07
Nrg1_mutant	DN112	2	445	777	219	0.492135	2792.07
Nrg1_mutant	DN112	3	383	808	222	0.579634	2792.07
Nrg1_mutant	DN112	4	386	857	233	0.603627	2792.07
Nrg1_mutant	DN112	5	424	868	260	0.613208	2792.07
Nrg1_mutant	DN112	6	377	909	274	0.72679	2792.07
Nrg1_mutant	DN112	7	402	771	223	0.554726	2792.07
Nrg1_mutant	DN112	8	414	844	258	0.623188	2792.07
Nrg1_mutant	DN112	9	436	813	336	0.770642	2792.07
Nrg1_mutant	DN112	10	422	756	258	0.611374	2792.07
Nrg1_mutant	DN114	1	440	966	243	0.552273	2792.07
Nrg1_mutant	DN114	2	390	869	220	0.564103	2792.07
Nrg1_mutant	DN114	3	395	910	217	0.549367	2792.07
Nrg1_mutant	DN114	4	416	859	185	0.444712	2792.07
Nrg1_mutant	DN114	5	366	862	183	0.5	2792.07
Nrg1_mutant	DN114	6	405	858	192	0.474074	2792.07
Nrg1_mutant	DN114	7	427	862	205	0.480094	2792.07
Nrg1_mutant	DN114	8	410	916	217	0.529268	2792.07
Nrg1_mutant	DN114	9	427	879	246	0.576112	2792.07
Nrg1_mutant	DN114	10	409	866	222	0.542787	2792.07
Nrg3_wildtype	DN94	1	401	839	180	0.448878	2792.07
Nrg3_wildtype	DN94	2	391	678	177	0.452685	2792.07
Nrg3_wildtype	DN94	3	430	764	223	0.518605	2792.07
Nrg3_wildtype	DN94	4	414	694	188	0.454106	2792.07
Nrg3_wildtype	DN94	5	393	657	150	0.381679	2792.07
Nrg3_wildtype	DN94	6	429	812	205	0.477855	2792.07
Nrg3_wildtype	DN94	7	438	658	167	0.381279	2792.07
Nrg3_wildtype	DN94	8	407	775	140	0.34398	2792.07
Nrg3_wildtype	DN94	9	404	818	182	0.450495	2792.07
Nrg3_wildtype	DN94	10	409	875	223	0.545232	2792.07
Nrg3_wildtype	DN95	1	410	817	222	0.541463	2792.07
Nrg3_wildtype	DN95	2	419	712	157	0.374702	2792.07
Nrg3_wildtype	DN95	3	408	761	157	0.384804	2792.07
Nrg3_wildtype	DN95	4	399	860	203	0.508772	2792.07
Nrg3_wildtype	DN95	5	459	821	214	0.466231	2792.07
Nrg3_wildtype	DN95	6	447	833	168	0.375839	2792.07
Nrg3_wildtype	DN95	7	431	794	167	0.387471	2792.07
Nrg3_wildtype	DN95	8	421	924	206	0.489311	2792.07
Nrg3_wildtype	DN95	9	417	857	207	0.496403	2792.07
Nrg3_wildtype	DN95	10	429	887	257	0.599068	2792.07
Nrg3_wildtype	DN99	1	396	795	199	0.502525	2792.07
Nrg3_wildtype	DN99	2	450	790	217	0.482222	2792.07
Nrg3_wildtype	DN99	3	398	823	234	0.58794	2792.07
Nrg3_wildtype	DN99	4	391	784	209	0.534527	2792.07
Nrg3_wildtype	DN99	5	396	858	232	0.585859	2792.07
Nrg3_wildtype	DN99	6	456	799	189	0.414474	2792.07
Nrg3_wildtype	DN99	7	401	842	227	0.566085	2792.07
Nrg3_wildtype	DN99	8	421	750	206	0.489311	2792.07
Nrg3_wildtype	DN99	9	412	746	185	0.449029	2792.07
Nrg3_wildtype	DN99	10	429	777	182	0.424242	2792.07
Nrg3_wildtype	DN100	1	481	1019	342	0.711019	2792.07
Nrg3_wildtype	DN100	2	417	892	278	0.666667	2792.07
Nrg3_wildtype	DN100	3	423	910	275	0.650118	2792.07
Nrg3_wildtype	DN100	4	426	943	312	0.732394	2792.07
Nrg3_wildtype	DN100	5	392	965	291	0.742347	2792.07
Nrg3_wildtype	DN100	6	427	769	187	0.437939	2792.07
Nrg3_wildtype	DN100	7	405	870	136	0.335802	2792.07
Nrg3_wildtype	DN100	8	454	1019	320	0.704846	2792.07
Nrg3_wildtype	DN100	9	413	799	161	0.389831	2792.07
Nrg3_wildtype	DN100	10	430	685	161	0.374419	2792.07
Nrg3_mutant	DN90	1	448	741	223	0.497768	2792.07
Nrg3_mutant	DN90	2	455	779	228	0.501099	2792.07
Nrg3_mutant	DN90	3	406	687	170	0.418719	2792.07
Nrg3_mutant	DN90	4	408	753	195	0.477941	2792.07
Nrg3_mutant	DN90	5	412	714	173	0.419903	2792.07
Nrg3_mutant	DN90	6	327	787	194	0.593272	2792.07
Nrg3_mutant	DN90	7	390	669	149	0.382051	2792.07
Nrg3_mutant	DN90	8	430	770	238	0.553488	2792.07
Nrg3_mutant	DN90	9	434	782	241	0.5553	2792.07
Nrg3_mutant	DN90	10	377	746	246	0.65252	2792.07
Nrg3_mutant	DN96	1	365	748	165	0.452055	2792.07
Nrg3_mutant	DN96	2	360	822	174	0.483333	2792.07
Nrg3_mutant	DN96	3	396	818	184	0.464646	2792.07
Nrg3_mutant	DN96	4	384	688	162	0.421875	2792.07
Nrg3_mutant	DN96	5	412	749	153	0.371359	2792.07
Nrg3_mutant	DN96	6	415	731	149	0.359036	2792.07
Nrg3_mutant	DN96	7	384	748	192	0.5	2792.07
Nrg3_mutant	DN96	8	402	740	212	0.527363	2792.07
Nrg3_mutant	DN96	9	372	743	138	0.370968	2792.07
Nrg3_mutant	DN96	10	431	813	163	0.37819	2792.07
Nrg3_mutant	DN98	1	414	853	216	0.521739	2792.07
Nrg3_mutant	DN98	2	435	851	202	0.464368	2792.07
Nrg3_mutant	DN98	3	409	786	178	0.435208	2792.07
Nrg3_mutant	DN98	4	451	817	206	0.456763	2792.07
Nrg3_mutant	DN98	5	436	840	190	0.43578	2792.07
Nrg3_mutant	DN98	6	411	762	224	0.545012	2792.07
Nrg3_mutant	DN98	7	424	823	231	0.544811	2792.07
Nrg3_mutant	DN98	8	386	875	221	0.572539	2792.07
Nrg3_mutant	DN98	9	362	898	241	0.665746	2792.07
Nrg3_mutant	DN98	10	426	797	186	0.43662	2792.07
Nrg3_mutant	DN97	1	442	805	232	0.524887	2792.07
Nrg3_mutant	DN97	2	380	726	219	0.576316	2792.07
Nrg3_mutant	DN97	3	446	753	234	0.524664	2792.07
Nrg3_mutant	DN97	4	429	728	237	0.552448	2792.07
Nrg3_mutant	DN97	5	416	756	203	0.487981	2792.07
Nrg3_mutant	DN97	6	410	776	247	0.602439	2792.07
Nrg3_mutant	DN97	7	421	779	204	0.484561	2792.07
Nrg3_mutant	DN97	8	432	795	201	0.465278	2792.07
Nrg3_mutant	DN97	9	490	783	179	0.365306	2792.07
Nrg3_mutant	DN97	10	436	731	198	0.454128	2792.07

## Sheet: Proportion_vglut1_psd95
Genotype	Brain	Cell	Count_vglut1	Count_psd95	Count_vglut1_psd95	Count_vglut1_psd95	Area_field
Nrg1_wildtype	DN104	1	944	1571	701	0.742585	2792.07
Nrg1_wildtype	DN104	2	1023	1496	577	0.564027	2792.07
Nrg1_wildtype	DN104	3	996	1658	679	0.681727	2792.07
Nrg1_wildtype	DN104	4	897	1430	564	0.628763	2792.07
Nrg1_wildtype	DN104	5	1018	1650	653	0.641454	2792.07
Nrg1_wildtype	DN104	6	971	1670	849	0.874356	2792.07
Nrg1_wildtype	DN104	7	895	1613	699	0.781006	2792.07
Nrg1_wildtype	DN104	8	923	1641	775	0.839653	2792.07
Nrg1_wildtype	DN104	9	924	1603	822	0.88961	2792.07
Nrg1_wildtype	DN104	10	951	1580	754	0.79285	2792.07
Nrg1_wildtype	DN105	1	1046	1416	616	0.58891	2792.07
Nrg1_wildtype	DN105	2	907	1510	674	0.743109	2792.07
Nrg1_wildtype	DN105	3	1062	1551	852	0.80226	2792.07
Nrg1_wildtype	DN105	4	930	1489	735	0.790323	2792.07
Nrg1_wildtype	DN105	5	1049	1628	798	0.760725	2792.07
Nrg1_wildtype	DN105	6	1055	1608	850	0.805687	2792.07
Nrg1_wildtype	DN105	7	882	1329	654	0.741497	2792.07
Nrg1_wildtype	DN105	8	1001	1624	707	0.706294	2792.07
Nrg1_wildtype	DN105	9	1078	1527	710	0.658627	2792.07
Nrg1_wildtype	DN105	10	944	1501	826	0.875	2792.07
Nrg1_wildtype	DN111	1	1048	1503	555	0.52958	2792.07
Nrg1_wildtype	DN111	2	1029	1583	619	0.601555	2792.07
Nrg1_wildtype	DN111	3	958	1595	866	0.903967	2792.07
Nrg1_wildtype	DN111	4	1010	1495	693	0.686139	2792.07
Nrg1_wildtype	DN111	5	972	1341	569	0.585391	2792.07
Nrg1_wildtype	DN111	6	903	1409	561	0.621262	2792.07
Nrg1_wildtype	DN111	7	993	1607	806	0.811682	2792.07
Nrg1_wildtype	DN111	8	1039	1516	683	0.657363	2792.07
Nrg1_wildtype	DN111	9	997	1468	688	0.69007	2792.07
Nrg1_wildtype	DN111	10	916	1397	604	0.659389	2792.07
Nrg1_wildtype	DN116	1	1006	1587	676	0.671968	2792.07
Nrg1_wildtype	DN116	2	992	1443	723	0.728831	2792.07
Nrg1_wildtype	DN116	3	910	1523	600	0.659341	2792.07
Nrg1_wildtype	DN116	4	1046	1565	751	0.717973	2792.07
Nrg1_wildtype	DN116	5	1087	1525	711	0.654094	2792.07
Nrg1_wildtype	DN116	6	1083	1522	785	0.724838	2792.07
Nrg1_wildtype	DN116	7	993	1442	722	0.72709	2792.07
Nrg1_wildtype	DN116	8	979	1547	747	0.763023	2792.07
Nrg1_wildtype	DN116	9	970	1564	678	0.698969	2792.07
Nrg1_wildtype	DN116	10	1000	1576	629	0.629	2792.07
Nrg1_mutant	DN106	1	921	1553	685	0.743757	2792.07
Nrg1_mutant	DN106	2	1140	1573	719	0.630702	2792.07
Nrg1_mutant	DN106	3	905	1519	756	0.835359	2792.07
Nrg1_mutant	DN106	4	887	1603	748	0.843292	2792.07
Nrg1_mutant	DN106	5	909	1364	514	0.565457	2792.07
Nrg1_mutant	DN106	6	992	1570	770	0.77621	2792.07
Nrg1_mutant	DN106	7	903	1625	733	0.811739	2792.07
Nrg1_mutant	DN106	8	1027	1636	707	0.688413	2792.07
Nrg1_mutant	DN106	9	974	1619	689	0.707392	2792.07
Nrg1_mutant	DN106	10	1065	1459	603	0.566197	2792.07
Nrg1_mutant	DN107	1	1079	1770	641	0.594069	2792.07
Nrg1_mutant	DN107	2	996	1718	523	0.5251	2792.07
Nrg1_mutant	DN107	3	1209	1765	782	0.646816	2792.07
Nrg1_mutant	DN107	4	966	1821	762	0.78882	2792.07
Nrg1_mutant	DN107	5	962	1597	676	0.702703	2792.07
Nrg1_mutant	DN107	6	920	1567	733	0.796739	2792.07
Nrg1_mutant	DN107	7	920	1567	733	0.796739	2792.07
Nrg1_mutant	DN107	8	887	1621	748	0.843292	2792.07
Nrg1_mutant	DN107	9	1142	1629	773	0.676883	2792.07
Nrg1_mutant	DN107	10	1087	1710	776	0.713891	2792.07
Nrg1_mutant	DN112	1	989	1305	690	0.697674	2792.07
Nrg1_mutant	DN112	2	866	1435	589	0.680139	2792.07
Nrg1_mutant	DN112	3	1069	1474	763	0.713751	2792.07
Nrg1_mutant	DN112	4	1002	1527	834	0.832335	2792.07
Nrg1_mutant	DN112	5	1097	1475	843	0.768459	2792.07
Nrg1_mutant	DN112	6	984	1491	704	0.715447	2792.07
Nrg1_mutant	DN112	7	1007	1406	607	0.602781	2792.07
Nrg1_mutant	DN112	8	932	1386	678	0.727468	2792.07
Nrg1_mutant	DN112	9	997	1368	755	0.757272	2792.07
Nrg1_mutant	DN112	10	1023	1606	799	0.781036	2792.07
Nrg1_mutant	DN117	1	1111	1552	592	0.532853	2792.07
Nrg1_mutant	DN117	2	1168	1579	705	0.603596	2792.07
Nrg1_mutant	DN117	3	1075	1486	651	0.605581	2792.07
Nrg1_mutant	DN117	4	1160	1663	698	0.601724	2792.07
Nrg1_mutant	DN117	5	1155	1590	760	0.658009	2792.07
Nrg1_mutant	DN117	6	899	1550	756	0.840934	2792.07
Nrg1_mutant	DN117	7	925	1565	576	0.622703	2792.07
Nrg1_mutant	DN117	8	979	1600	708	0.723187	2792.07
Nrg1_mutant	DN117	9	1148	1467	637	0.554878	2792.07
Nrg1_mutant	DN117	10	978	1580	694	0.709611	2792.07
Nrg3_wildtype	DN93	1	895	1571	724	0.808939	2792.07
Nrg3_wildtype	DN93	2	963	1661	650	0.674974	2792.07
Nrg3_wildtype	DN93	3	945	1612	792	0.838095	2792.07
Nrg3_wildtype	DN93	4	933	1682	882	0.945338	2792.07
Nrg3_wildtype	DN93	5	1046	1712	762	0.728489	2792.07
Nrg3_wildtype	DN93	6	1106	1777	755	0.68264	2792.07
Nrg3_wildtype	DN93	7	820	1652	691	0.842683	2792.07
Nrg3_wildtype	DN93	8	809	1450	631	0.779975	2792.07
Nrg3_wildtype	DN93	9	876	1656	780	0.890411	2792.07
Nrg3_wildtype	DN93	10	882	1595	593	0.672336	2792.07
Nrg3_wildtype	DN94	1	912	1513	683	0.748904	2792.07
Nrg3_wildtype	DN94	2	919	1754	706	0.768226	2792.07
Nrg3_wildtype	DN94	3	1055	1786	723	0.685308	2792.07
Nrg3_wildtype	DN94	4	1079	1735	835	0.773865	2792.07
Nrg3_wildtype	DN94	5	833	1528	696	0.835534	2792.07
Nrg3_wildtype	DN94	6	937	1740	806	0.860192	2792.07
Nrg3_wildtype	DN94	7	915	1646	799	0.873224	2792.07
Nrg3_wildtype	DN94	8	1016	1653	674	0.663386	2792.07
Nrg3_wildtype	DN94	9	915	1545	607	0.663388	2792.07
Nrg3_wildtype	DN94	10	1093	1660	637	0.5828	2792.07
Nrg3_wildtype	DN95	1	965	1662	794	0.822798	2792.07
Nrg3_wildtype	DN95	2	999	1829	753	0.753754	2792.07
Nrg3_wildtype	DN95	3	988	1653	748	0.757085	2792.07
Nrg3_wildtype	DN95	4	1072	1780	826	0.770522	2792.07
Nrg3_wildtype	DN95	5	928	1721	678	0.730603	2792.07
Nrg3_wildtype	DN95	6	919	1701	826	0.898803	2792.07
Nrg3_wildtype	DN95	7	925	1594	701	0.757838	2792.07
Nrg3_wildtype	DN95	8	943	1549	553	0.586426	2792.07
Nrg3_wildtype	DN95	9	957	1560	606	0.633229	2792.07
Nrg3_wildtype	DN95	10	1007	1633	626	0.621648	2792.07
Nrg3_wildtype	DN92	1	842	1578	622	0.738717	2792.07
Nrg3_wildtype	DN92	2	986	1704	726	0.736308	2792.07
Nrg3_wildtype	DN92	3	997	1676	757	0.759278	2792.07
Nrg3_wildtype	DN92	4	1104	1687	701	0.634964	2792.07
Nrg3_wildtype	DN92	5	941	1595	569	0.604676	2792.07
Nrg3_wildtype	DN92	6	895	1516	578	0.64581	2792.07
Nrg3_wildtype	DN92	7	824	1448	639	0.775485	2792.07
Nrg3_wildtype	DN92	8	868	1519	662	0.762673	2792.07
Nrg3_wildtype	DN92	9	887	1579	859	0.968433	2792.07
Nrg3_wildtype	DN92	10	858	1474	582	0.678322	2792.07
Nrg3_mutant	DN89	1	953	1622	758	0.795383	2792.07
Nrg3_mutant	DN89	2	937	1461	711	0.758805	2792.07
Nrg3_mutant	DN89	3	897	1543	641	0.714604	2792.07
Nrg3_mutant	DN89	4	1070	1898	768	0.717757	2792.07
Nrg3_mutant	DN89	5	1218	1828	759	0.623153	2792.07
Nrg3_mutant	DN89	6	1097	1737	705	0.642662	2792.07
Nrg3_mutant	DN89	7	921	1793	810	0.879479	2792.07
Nrg3_mutant	DN89	8	1016	1773	688	0.677165	2792.07
Nrg3_mutant	DN89	9	956	1619	638	0.667364	2792.07
Nrg3_mutant	DN89	10	947	1512	783	0.826822	2792.07
Nrg3_mutant	DN90	1	1092	1635	780	0.714286	2792.07
Nrg3_mutant	DN90	2	942	1561	761	0.807856	2792.07
Nrg3_mutant	DN90	3	942	1613	703	0.746285	2792.07
Nrg3_mutant	DN90	4	1082	1670	773	0.714418	2792.07
Nrg3_mutant	DN90	5	1096	1685	775	0.707117	2792.07
Nrg3_mutant	DN90	6	936	1662	768	0.820513	2792.07
Nrg3_mutant	DN90	7	982	1590	759	0.772912	2792.07
Nrg3_mutant	DN90	8	961	1616	817	0.850156	2792.07
Nrg3_mutant	DN90	9	921	1694	750	0.814332	2792.07
Nrg3_mutant	DN90	10	1132	1725	765	0.675795	2792.07
Nrg3_mutant	DN96	1	908	1668	851	0.937225	2792.07
Nrg3_mutant	DN96	2	941	1724	790	0.839532	2792.07
Nrg3_mutant	DN96	3	860	1498	610	0.709302	2792.07
Nrg3_mutant	DN96	4	1005	1625	540	0.537313	2792.07
Nrg3_mutant	DN96	5	861	1574	651	0.756098	2792.07
Nrg3_mutant	DN96	6	903	1551	641	0.709856	2792.07
Nrg3_mutant	DN96	7	848	1519	575	0.678066	2792.07
Nrg3_mutant	DN96	8	686	1651	639	0.931487	2792.07
Nrg3_mutant	DN96	9	901	1674	764	0.847947	2792.07
Nrg3_mutant	DN96	10	973	1724	746	0.766701	2792.07
Nrg3_mutant	DN91	1	1011	1716	715	0.707221	2792.07
Nrg3_mutant	DN91	2	942	1651	732	0.77707	2792.07
Nrg3_mutant	DN91	3	961	1718	861	0.895942	2792.07
Nrg3_mutant	DN91	4	1125	1779	777	0.690667	2792.07
Nrg3_mutant	DN91	5	922	1696	701	0.760304	2792.07
Nrg3_mutant	DN91	6	933	1655	697	0.747053	2792.07
Nrg3_mutant	DN91	7	936	1647	677	0.723291	2792.07
Nrg3_mutant	DN91	8	979	1728	822	0.839632	2792.07
Nrg3_mutant	DN91	9	1032	1766	698	0.676357	2792.07
Nrg3_mutant	DN91	10	1042	1717	745	0.714971	2792.07
