# Supplementary material for: Subcellular sorting of neuregulins controls the assembly of excitatory-inhibitory cortical circuits
Source: eLife. 2020 Dec 15;9:e57000. doi: 10.7554/eLife.57000 (PMC7755390; doi:10.7554/eLife.57000)
Supplement: Figure 1—figure supplement 4—source data 1. [file elife-57000-fig1-figsupp4-data1.xlsx]

## Sheet: AIS_synapses
Genotype	Brain	Cell	Count_gad67	Length_pikba	Density_gad67
Nrg1_wildtype	DN104	1	3	11.405	0.263043
Nrg1_wildtype	DN104	2	3	10.93	0.274474
Nrg1_wildtype	DN104	3	4	12.508	0.319795
Nrg1_wildtype	DN104	4	7	18.401	0.380414
Nrg1_wildtype	DN104	5	4	20.5	0.195122
Nrg1_wildtype	DN104	6	3	13.3	0.225564
Nrg1_wildtype	DN104	7	2	10.862	0.184128
Nrg1_wildtype	DN104	8	6	15.759	0.380735
Nrg1_wildtype	DN104	9	8	14.747	0.542483
Nrg1_wildtype	DN104	10	2	12.575	0.159046
Nrg1_wildtype	DN104	11	6	12.962	0.462892
Nrg1_wildtype	DN104	12	5	9.222	0.542182
Nrg1_wildtype	DN104	13	4	15.51	0.257898
Nrg1_wildtype	DN104	14	7	19.154	0.365459
Nrg1_wildtype	DN104	15	2	14.158	0.141263
Nrg1_wildtype	DN104	16	7	15.567	0.449669
Nrg1_wildtype	DN104	17	6	12.965	0.462784
Nrg1_wildtype	DN104	18	4	14.286	0.279994
Nrg1_wildtype	DN104	19	2	11.69	0.171086
Nrg1_wildtype	DN104	20	4	14.578	0.274386
Nrg1_wildtype	DN104	21	4	10.166	0.393468
Nrg1_mutant	DN106	1	5	21.293	0.234819
Nrg1_mutant	DN106	2	7	16.265	0.430372
Nrg1_mutant	DN106	3	3	13.931	0.215347
Nrg1_mutant	DN106	4	5	13.511	0.370069
Nrg1_mutant	DN106	5	1	10.63	0.0940734
Nrg1_mutant	DN106	6	5	12.896	0.387717
Nrg1_mutant	DN106	7	6	16.175	0.370943
Nrg1_mutant	DN106	8	6	18.587	0.322806
Nrg1_mutant	DN106	9	4	15.718	0.254485
Nrg1_mutant	DN106	10	0	7.934	0
Nrg1_mutant	DN106	11	1	13.936	0.0717566
Nrg1_mutant	DN106	12	0	18.819	0
Nrg1_mutant	DN106	13	7	16.309	0.429211
Nrg1_mutant	DN106	14	2	15.039	0.132988
Nrg1_mutant	DN106	15	5	11.18	0.447227
Nrg1_mutant	DN106	16	2	14.736	0.135722
Nrg1_mutant	DN106	17	3	10.574	0.283715
Nrg1_mutant	DN106	18	4	16.634	0.240471
Nrg1_mutant	DN106	19	4	10.521	0.380192
Nrg1_mutant	DN106	20	1	12.018	0.0832085
Nrg1_mutant	DN106	21	0	9.777	0
Nrg1_mutant	DN106	22	3	14.572	0.205874
Nrg1_mutant	DN106	23	5	15.889	0.314683
Nrg1_mutant	DN106	24	5	9.103	0.549269
Nrg1_mutant	DN106	25	7	19.596	0.357216
Nrg1_mutant	DN106	26	1	7.344	0.136166
Nrg1_mutant	DN106	27	1	8.84	0.113122
Nrg1_mutant	DN106	28	6	19.2	0.3125
Nrg1_mutant	DN106	29	4	12.309	0.324965
Nrg1_mutant	DN106	30	4	16.871	0.237093
Nrg1_mutant	DN106	31	6	16.547	0.362603
Nrg1_mutant	DN106	32	3	18.234	0.164528
Nrg1_mutant	DN106	33	4	19	0.213265
Nrg1_mutant	DN106	34	2	16.635	0.120228
Nrg1_wildtype	DN105	1	0	11.741	0
Nrg1_wildtype	DN105	2	9	19.038	0.472739
Nrg1_wildtype	DN105	3	8	10.952	0.73046
Nrg1_wildtype	DN105	4	3	8.006	0.374719
Nrg1_wildtype	DN105	5	6	14.267	0.420551
Nrg1_wildtype	DN105	6	4	15.207	0.263037
Nrg1_wildtype	DN105	7	2	13.582	0.147254
Nrg1_wildtype	DN105	8	9	13.941	0.645578
Nrg1_wildtype	DN105	9	2	11.495	0.173989
Nrg1_wildtype	DN105	10	4	12.436	0.321647
Nrg1_wildtype	DN105	11	4	11.446	0.349467
Nrg1_wildtype	DN105	12	2	14.566	0.137306
Nrg1_wildtype	DN105	13	6	7.451	0.805261
Nrg1_wildtype	DN105	14	6	7.645	0.784827
Nrg1_wildtype	DN105	15	4	17.76	0.225225
Nrg1_wildtype	DN105	16	5	15.172	0.329554
Nrg1_wildtype	DN105	17	3	15.621	0.192049
Nrg1_wildtype	DN105	18	9	12.306	0.731351
Nrg1_wildtype	DN105	19	4	14.497	0.275919
Nrg1_wildtype	DN105	20	5	17.178	0.29107
Nrg1_wildtype	DN105	21	4	15.526	0.257632
Nrg1_wildtype	DN105	22	1	8.61	0.116144
Nrg1_wildtype	DN105	23	0	10.612	0
Nrg1_wildtype	DN105	24	3	6.39	0.469484
Nrg1_wildtype	DN105	25	2	19.839	0.100812
Nrg1_wildtype	DN105	26	4	12.739	0.313996
Nrg1_wildtype	DN105	27	4	15.317	0.261148
Nrg1_wildtype	DN105	28	2	15.201	0.13157
Nrg1_wildtype	DN105	29	5	13.382	0.373636
Nrg1_wildtype	DN105	30	2	14.105	0.141794
Nrg1_wildtype	DN105	31	2	12.716	0.157282
Nrg1_wildtype	DN105	32	2	7.904	0.253036
Nrg1_wildtype	DN105	33	10	17.721	0.564302
Nrg1_mutant	DN107	1	3	14.963	0.200495
Nrg1_mutant	DN107	2	1	12.554	0.0796559
Nrg1_mutant	DN107	3	4	7.972	0.501756
Nrg1_mutant	DN107	4	5	21.491	0.232656
Nrg1_mutant	DN107	5	2	17.329	0.115413
Nrg1_mutant	DN107	6	1	11.157	0.0896298
Nrg1_mutant	DN107	7	4	13.853	0.288746
Nrg1_mutant	DN107	8	7	10.547	0.663696
Nrg1_mutant	DN107	9	7	15.834	0.442087
Nrg1_mutant	DN107	10	2	9.611	0.208095
Nrg1_mutant	DN107	11	2	12.038	0.166141
Nrg1_mutant	DN107	12	1	8.165	0.122474
Nrg1_mutant	DN107	13	7	17.439	0.401399
Nrg1_mutant	DN107	14	1	13.26	0.0754148
Nrg1_mutant	DN107	15	1	11.829	0.084538
Nrg1_mutant	DN107	16	3	12.405	0.241838
Nrg1_mutant	DN107	17	2	9.287	0.215355
Nrg1_mutant	DN107	18	3	13.41	0.223714
Nrg1_mutant	DN107	19	4	16.469	0.242881
Nrg1_mutant	DN107	20	3	8.341	0.359669
Nrg1_mutant	DN107	21	2	15.093	0.132512
Nrg1_mutant	DN107	22	2	13.315	0.150207
Nrg1_mutant	DN107	23	3	16.408	0.182838
Nrg1_mutant	DN107	24	1	11.405	0.0876808
Nrg1_mutant	DN107	25	4	16.978	0.235599
Nrg1_mutant	DN107	26	4	15.527	0.257616
Nrg1_mutant	DN107	27	3	21.719	0.138128
Nrg1_mutant	DN107	28	8	15.835	0.50521
Nrg1_wildtype	DN111	1	5	12.006	0.416458
Nrg1_wildtype	DN111	2	2	10.751	0.186029
Nrg1_wildtype	DN111	3	2	8.054	0.248324
Nrg1_wildtype	DN111	4	5	11.856	0.421727
Nrg1_wildtype	DN111	5	4	16.557	0.24159
Nrg1_wildtype	DN111	6	6	14.391	0.416927
Nrg1_wildtype	DN111	7	4	14.087	0.28395
Nrg1_wildtype	DN111	8	5	8.271	0.604522
Nrg1_wildtype	DN111	9	11	16.619	0.661893
Nrg1_wildtype	DN111	10	3	14.012	0.214102
Nrg1_wildtype	DN111	11	4	20.755	0.192725
Nrg1_wildtype	DN111	12	2	10.405	0.192215
Nrg1_wildtype	DN111	13	4	9.785	0.408789
Nrg1_wildtype	DN111	14	2	11.842	0.16889
Nrg1_wildtype	DN111	15	8	14.029	0.570247
Nrg1_wildtype	DN111	16	2	10.41	0.192123
Nrg1_wildtype	DN111	17	4	19.519	0.204929
Nrg1_wildtype	DN111	18	4	18.93	0.211305
Nrg1_wildtype	DN111	19	3	12.212	0.24566
Nrg1_wildtype	DN111	20	3	8.657	0.34654
Nrg1_wildtype	DN111	21	5	13.964	0.358064
Nrg1_wildtype	DN111	22	4	18.875	0.211921
Nrg1_wildtype	DN111	23	4	14.741	0.271352
Nrg1_wildtype	DN111	24	3	11.399	0.263181
Nrg1_wildtype	DN111	25	0	12.655	0
Nrg1_wildtype	DN111	26	5	7.808	0.640369
Nrg1_wildtype	DN111	27	2	7.561	0.264515
Nrg1_wildtype	DN111	28	6	16.528	0.36302
Nrg1_wildtype	DN111	29	6	10.009	0.59946
Nrg1_wildtype	DN111	30	7	14.528	0.481828
Nrg1_wildtype	DN111	31	2	7.732	0.258665
Nrg1_mutant	DN112	1	7	13.133	0.533008
Nrg1_mutant	DN112	2	1	10.768	0.0928678
Nrg1_mutant	DN112	3	7	19.062	0.367223
Nrg1_mutant	DN112	4	3	18.115	0.165609
Nrg1_mutant	DN112	5	7	13.43	0.521221
Nrg1_mutant	DN112	6	9	20.676	0.435287
Nrg1_mutant	DN112	7	1	9.227	0.108378
Nrg1_mutant	DN112	8	2	10.978	0.182183
Nrg1_mutant	DN112	9	4	11.668	0.342818
Nrg1_mutant	DN112	10	7	19.615	0.35687
Nrg1_mutant	DN112	11	1	13.353	0.0748895
Nrg1_mutant	DN112	12	4	9.77	0.409417
Nrg1_mutant	DN112	13	4	18.326	0.218269
Nrg1_mutant	DN112	14	7	15.701	0.445831
Nrg1_mutant	DN112	15	1	14.457	0.0691706
Nrg1_mutant	DN112	16	5	13.543	0.369194
Nrg1_mutant	DN112	17	5	14.05	0.355872
Nrg1_mutant	DN112	18	5	17.048	0.29329
Nrg1_mutant	DN112	19	4	11.309	0.353701
Nrg1_mutant	DN112	20	3	12.369	0.242542
Nrg1_mutant	DN112	21	3	12.112	0.247688
Nrg1_mutant	DN112	22	3	16.486	0.181973
Nrg1_mutant	DN112	23	4	14.091	0.283869
Nrg1_mutant	DN112	24	6	21.007	0.285619
Nrg1_mutant	DN112	25	7	11.779	0.594278
Nrg1_mutant	DN112	26	0	11.36	0
Nrg1_mutant	DN112	27	0	11.751	0
Nrg1_mutant	DN112	28	2	12.393	0.161381
Nrg1_mutant	DN112	29	2	16.637	0.120214
Nrg1_mutant	DN112	30	6	16.863	0.355809
Nrg1_mutant	DN112	31	6	14.19	0.422833
Nrg1_mutant	DN112	32	0	9.638	0
Nrg1_mutant	DN112	33	1	10.205	0.0979912
Nrg1_mutant	DN112	34	7	15.584	0.449179
Nrg1_wildtype	DN113	1	2	8.425	0.237389
Nrg1_wildtype	DN113	2	6	14.426	0.415916
Nrg1_wildtype	DN113	3	2	10.823	0.184792
Nrg1_wildtype	DN113	4	4	8.027	0.498318
Nrg1_wildtype	DN113	5	2	14.006	0.142796
Nrg1_wildtype	DN113	6	5	10.084	0.495835
Nrg1_wildtype	DN113	7	4	12.598	0.317511
Nrg1_wildtype	DN113	8	6	14.159	0.423759
Nrg1_wildtype	DN113	9	0	7.682	0
Nrg1_wildtype	DN113	10	6	14.8	0.405405
Nrg1_wildtype	DN113	11	6	13.189	0.454925
Nrg1_wildtype	DN113	12	1	13.116	0.0762428
Nrg1_wildtype	DN113	13	5	15.63	0.319898
Nrg1_wildtype	DN113	14	3	12.217	0.245559
Nrg1_wildtype	DN113	15	3	9.004	0.333185
Nrg1_wildtype	DN113	16	5	13.36	0.374251
Nrg1_wildtype	DN113	17	7	16.136	0.433813
Nrg1_wildtype	DN113	18	2	15.135	0.132144
Nrg1_wildtype	DN113	19	4	7.334	0.545405
Nrg1_wildtype	DN113	20	1	10.845	0.0922084
Nrg1_wildtype	DN113	21	4	16.174	0.24731
Nrg1_wildtype	DN113	22	7	19.774	0.354
Nrg1_wildtype	DN113	23	5	11.312	0.442008
Nrg1_wildtype	DN113	24	4	14.033	0.285042
Nrg1_wildtype	DN113	25	3	9.302	0.322511
Nrg1_wildtype	DN113	26	5	11.977	0.417467
Nrg1_wildtype	DN113	27	2	9.055	0.220872
Nrg1_wildtype	DN113	28	7	13.537	0.517101
Nrg1_mutant	DN114	1	2	13.936	0.143513
Nrg1_mutant	DN114	2	7	15.506	0.451438
Nrg1_mutant	DN114	3	1	8.69	0.115075
Nrg1_mutant	DN114	4	1	10.148	0.0985416
Nrg1_mutant	DN114	5	4	15.289	0.261626
Nrg1_mutant	DN114	6	1	10.877	0.0919371
Nrg1_mutant	DN114	7	3	13.275	0.225989
Nrg1_mutant	DN114	8	0	11.156	0
Nrg1_mutant	DN114	9	4	9.656	0.41425
Nrg1_mutant	DN114	10	2	12.295	0.162668
Nrg1_mutant	DN114	11	6	6.877	0.872473
Nrg1_mutant	DN114	12	1	9.903	0.10098
Nrg1_mutant	DN114	13	2	12.242	0.163372
Nrg1_mutant	DN114	14	5	21.122	0.23672
Nrg1_mutant	DN114	15	4	11.908	0.335909
Nrg1_mutant	DN114	16	3	8.34	0.359712
Nrg1_mutant	DN114	17	1	11.944	0.083724
Nrg1_mutant	DN114	18	2	9.891	0.202204
Nrg1_mutant	DN114	19	3	13.029	0.230256
Nrg1_mutant	DN114	20	7	10.208	0.685737
Nrg1_mutant	DN114	21	2	11.881	0.168336
Nrg1_mutant	DN114	22	4	15.847	0.252414
Nrg1_mutant	DN114	23	5	18.539	0.269702
Nrg1_mutant	DN114	24	2	10.813	0.184963
Nrg1_mutant	DN114	25	3	10.677	0.280978
Nrg1_mutant	DN114	26	0	10.831	0
Nrg1_mutant	DN114	27	7	19.899	0.351776
Nrg1_mutant	DN114	28	4	13.868	0.288434
Nrg1_mutant	DN114	29	3	17.909	0.167514
Nrg1_mutant	DN114	30	4	15.78	0.253485
Nrg1_mutant	DN114	31	7	17.241	0.406009
Nrg1_wildtype	DN116	1	2	6.793	0.294421
Nrg1_wildtype	DN116	2	10	16.382	0.610426
Nrg1_wildtype	DN116	3	3	7.35	0.408163
Nrg1_wildtype	DN116	4	3	7.441	0.403172
Nrg1_wildtype	DN116	5	3	10.847	0.276574
Nrg1_wildtype	DN116	6	4	9.232	0.433276
Nrg1_wildtype	DN116	7	4	8.323	0.480596
Nrg1_wildtype	DN116	8	5	10.936	0.457206
Nrg1_wildtype	DN116	9	3	8.763	0.342349
Nrg1_wildtype	DN116	10	5	10.18	0.491159
Nrg1_wildtype	DN116	11	5	10.838	0.46134
Nrg1_wildtype	DN116	12	5	10.559	0.47353
Nrg1_wildtype	DN116	13	2	11.676	0.171292
Nrg1_wildtype	DN116	14	3	9.797	0.306216
Nrg1_wildtype	DN116	15	7	15.562	0.449814
Nrg1_wildtype	DN116	16	9	16.968	0.53041
Nrg1_wildtype	DN116	17	3	10.045	0.298656
Nrg1_wildtype	DN116	18	4	12.594	0.317612
Nrg1_wildtype	DN116	19	3	8.481	0.353732
Nrg1_wildtype	DN116	20	5	13.419	0.372606
Nrg1_wildtype	DN116	21	4	13.552	0.295159
Nrg1_wildtype	DN116	22	5	15.051	0.332204
Nrg1_wildtype	DN116	23	8	14.803	0.540431
Nrg1_wildtype	DN116	24	3	14.804	0.202648
Nrg1_wildtype	DN116	25	4	10.924	0.366166
Nrg1_wildtype	DN116	26	2	7.465	0.267917
Nrg1_wildtype	DN116	27	1	11.622	0.0860437
Nrg1_wildtype	DN116	28	4	8.85	0.451977
Nrg1_wildtype	DN116	29	5	11.839	0.422333
Nrg1_wildtype	DN116	30	5	14.578	0.342983
Nrg1_wildtype	DN116	31	2	9.098	0.219829
Nrg1_wildtype	DN116	32	9	18.471	0.48725
Nrg1_mutant	DN117	1	2	8.825	0.226629
Nrg1_mutant	DN117	2	1	5.705	0.175285
Nrg1_mutant	DN117	3	6	16.49	0.363857
Nrg1_mutant	DN117	4	5	13.66	0.366032
Nrg1_mutant	DN117	5	9	18.576	0.484496
Nrg1_mutant	DN117	6	4	11.901	0.336106
Nrg1_mutant	DN117	7	2	9.564	0.209118
Nrg1_mutant	DN117	8	2	7.588	0.263574
Nrg1_mutant	DN117	9	7	18.824	0.371866
Nrg1_mutant	DN117	10	0	8.826	0
Nrg1_mutant	DN117	11	2	12.502	0.159974
Nrg1_mutant	DN117	12	8	14.964	0.534616
Nrg1_mutant	DN117	13	1	8.661	0.11546
Nrg1_mutant	DN117	14	1	8.029	0.124549
Nrg1_mutant	DN117	15	4	9.246	0.43262
Nrg1_mutant	DN117	16	4	11.856	0.337382
Nrg1_mutant	DN117	17	4	9.43	0.424178
Nrg1_mutant	DN117	18	4	11.508	0.347584
Nrg1_mutant	DN117	19	4	17.008	0.235183
Nrg1_mutant	DN117	20	3	11.729	0.255776
Nrg1_mutant	DN117	21	2	14.724	0.135833
Nrg1_mutant	DN117	22	2	13.069	0.153034
Nrg1_mutant	DN117	23	7	18.039	0.388048
Nrg1_mutant	DN117	24	2	9.546	0.209512
Nrg1_mutant	DN117	25	2	13.668	0.146327
Nrg1_mutant	DN117	26	6	12.393	0.484144
Nrg1_mutant	DN117	27	7	13.341	0.524698
Nrg1_mutant	DN117	28	5	19.089	0.261931
Nrg1_wildtype	DN118	1	3	9.477	0.316556
Nrg1_wildtype	DN118	2	4	10.448	0.382848
Nrg1_wildtype	DN118	3	4	8.278	0.483209
Nrg1_wildtype	DN118	4	3	14.003	0.21424
Nrg1_wildtype	DN118	5	11	20.563	0.534941
Nrg1_wildtype	DN118	6	6	21.025	0.285375
Nrg1_wildtype	DN118	7	3	7.998	0.375094
Nrg1_wildtype	DN118	8	3	19.381	0.154791
Nrg1_wildtype	DN118	9	8	22.196	0.360425
Nrg1_wildtype	DN118	10	8	17.412	0.459453
Nrg1_wildtype	DN118	11	2	12.677	0.157766
Nrg1_wildtype	DN118	12	5	17.158	0.291409
Nrg1_wildtype	DN118	13	8	20.848	0.38373
Nrg1_wildtype	DN118	14	4	16.361	0.244484
Nrg1_wildtype	DN118	15	5	13.181	0.379334
Nrg1_wildtype	DN118	16	5	12.591	0.397109
Nrg1_wildtype	DN118	17	7	17.45	0.401146
Nrg1_wildtype	DN118	18	4	14.552	0.274876
Nrg1_wildtype	DN118	19	4	9.138	0.437733
Nrg1_wildtype	DN118	20	6	17.483	0.343191
Nrg1_wildtype	DN118	21	3	10.484	0.28615
Nrg1_wildtype	DN118	22	2	13.16	0.151976
Nrg1_wildtype	DN118	23	4	8.707	0.4594
Nrg1_wildtype	DN118	24	7	11.366	0.615872
Nrg1_wildtype	DN118	25	3	9.578	0.313218
Nrg1_wildtype	DN118	26	3	11.181	0.268312
Nrg1_wildtype	DN118	27	4	16.662	0.240067
Nrg1_wildtype	DN118	28	6	24.22	0.247729
Nrg1_wildtype	DN118	29	10	18.625	0.536913
Nrg1_wildtype	DN118	30	2	14.167	0.141173
Nrg1_wildtype	DN118	31	3	13.27	0.226074
Nrg1_wildtype	DN118	32	5	11.609	0.4307
Nrg1_wildtype	DN118	33	7	20.171	0.347033
Nrg1_mutant	DN120	1	2	11.707	0.170838
Nrg1_mutant	DN120	2	2	6.978	0.286615
Nrg1_mutant	DN120	3	5	9.738	0.513452
Nrg1_mutant	DN120	4	4	14.07	0.284293
Nrg1_mutant	DN120	5	2	10.928	0.183016
Nrg1_mutant	DN120	6	0	10.858	0
Nrg1_mutant	DN120	7	3	10.53	0.2849
Nrg1_mutant	DN120	8	8	18.651	0.428931
Nrg1_mutant	DN120	9	6	14.383	0.417159
Nrg1_mutant	DN120	10	3	13.795	0.21747
Nrg1_mutant	DN120	11	5	10.344	0.483372
Nrg1_mutant	DN120	12	5	20.297	0.246342
Nrg1_mutant	DN120	13	2	9.246	0.21631
Nrg1_mutant	DN120	14	3	16.858	0.177957
Nrg1_mutant	DN120	15	3	14.836	0.202211
Nrg1_mutant	DN120	16	8	15.292	0.523149
Nrg1_mutant	DN120	17	5	24.308	0.205694
Nrg1_mutant	DN120	18	8	14.717	0.543589
Nrg1_mutant	DN120	19	3	13.918	0.215548
Nrg1_mutant	DN120	20	1	10.338	0.0967305
Nrg1_mutant	DN120	21	10	15.354	0.651296
Nrg1_mutant	DN120	22	8	10.012	0.799041
Nrg1_mutant	DN120	23	5	12.536	0.398851
Nrg1_mutant	DN120	24	6	11.767	0.509901
Nrg1_mutant	DN120	25	9	24.095	0.373521
Nrg1_mutant	DN120	26	4	16.687	0.239708
Nrg1_mutant	DN120	27	1	6.984	0.143184
Nrg1_mutant	DN120	28	5	12.11	0.412882
Nrg1_mutant	DN120	29	3	11.066	0.271101
Nrg1_mutant	DN120	30	3	14.291	0.209922
Nrg1_mutant	DN120	31	4	14.508	0.27571
Nrg1_mutant	DN120	32	6	21.769	0.275621
Nrg1_mutant	DN120	33	4	15.276	0.261849
Nrg1_mutant	DN120	34	6	15.628	0.383926
Nrg1_mutant	DN120	35	7	20.444	0.342399
Nrg1_mutant	DN120	36	6	23.058	0.260213
Nrg1_mutant	DN120	37	4	17.101	0.233904
Nrg1_mutant	DN120	38	5	17.169	0.291223
Nrg1_mutant	DN120	39	4	14.117	0.283346
Nrg1_mutant	DN120	40	4	12.681	0.315433
Nrg1_mutant	DN120	41	1	9.524	0.104998
Nrg3_wildtype	DN93	1	7	11.275	0.620843
Nrg3_wildtype	DN93	2	5	16.41	0.304692
Nrg3_wildtype	DN93	3	3	14.805	0.202634
Nrg3_wildtype	DN93	4	3	13.811	0.217218
Nrg3_wildtype	DN93	5	6	13.41	0.447427
Nrg3_wildtype	DN93	6	8	15.791	0.506618
Nrg3_wildtype	DN93	7	2	12.449	0.160655
Nrg3_wildtype	DN93	8	3	13.333	0.225006
Nrg3_wildtype	DN93	9	2	8.399	0.238124
Nrg3_wildtype	DN93	10	4	12.71	0.314713
Nrg3_wildtype	DN93	11	6	11.838	0.506842
Nrg3_wildtype	DN93	12	2	8.047	0.24854
Nrg3_wildtype	DN93	13	4	17.836	0.224266
Nrg3_wildtype	DN93	14	3	18.201	0.164826
Nrg3_wildtype	DN93	15	7	16.044	0.4363
Nrg3_wildtype	DN93	16	7	15.194	0.460708
Nrg3_wildtype	DN93	17	3	10.064	0.298092
Nrg3_wildtype	DN93	18	8	16.847	0.474862
Nrg3_wildtype	DN93	19	4	13.954	0.286656
Nrg3_wildtype	DN93	20	7	10.098	0.693207
Nrg3_wildtype	DN93	21	5	13.228	0.377986
Nrg3_wildtype	DN93	22	9	15.948	0.564334
Nrg3_wildtype	DN93	23	6	12.153	0.493705
Nrg3_wildtype	DN93	24	7	15.29	0.457816
Nrg3_wildtype	DN93	25	2	15.72	0.127226
Nrg3_wildtype	DN93	26	6	14.768	0.406284
Nrg3_wildtype	DN93	27	5	11.205	0.446229
Nrg3_wildtype	DN93	28	1	8.32	0.120192
Nrg3_wildtype	DN93	29	5	13.333	0.375009
Nrg3_wildtype	DN93	30	2	10.017	0.199661
Nrg3_mutant	DN89	1	2	14.882	0.134391
Nrg3_mutant	DN89	2	2	12.012	0.1665
Nrg3_mutant	DN89	3	4	17.313	0.23104
Nrg3_mutant	DN89	4	3	15.552	0.192901
Nrg3_mutant	DN89	5	11	16.191	0.67939
Nrg3_mutant	DN89	6	5	11.925	0.419287
Nrg3_mutant	DN89	7	9	21.18	0.424929
Nrg3_mutant	DN89	8	7	15.472	0.45243
Nrg3_mutant	DN89	9	4	11.27	0.354925
Nrg3_mutant	DN89	10	8	14.771	0.541602
Nrg3_mutant	DN89	11	5	14.308	0.349455
Nrg3_mutant	DN89	12	9	19.201	0.468726
Nrg3_mutant	DN89	13	5	19.212	0.260254
Nrg3_mutant	DN89	14	2	11.551	0.173145
Nrg3_mutant	DN89	15	6	15.761	0.380687
Nrg3_mutant	DN89	16	2	14.741	0.135676
Nrg3_mutant	DN89	17	3	13.525	0.221811
Nrg3_mutant	DN89	18	2	19.486	0.102638
Nrg3_mutant	DN89	19	6	13.068	0.459137
Nrg3_mutant	DN89	20	6	15.117	0.396904
Nrg3_wildtype	DN94	1	3	10.087	0.297413
Nrg3_wildtype	DN94	2	2	15.338	0.130395
Nrg3_wildtype	DN94	3	3	9.987	0.300391
Nrg3_wildtype	DN94	4	1	12.141	0.0823655
Nrg3_wildtype	DN94	5	2	12.916	0.154847
Nrg3_wildtype	DN94	6	4	12.028	0.332557
Nrg3_wildtype	DN94	7	4	13.4	0.298507
Nrg3_wildtype	DN94	8	6	14.984	0.400427
Nrg3_wildtype	DN94	9	5	8.72	0.573394
Nrg3_wildtype	DN94	10	3	12.476	0.240462
Nrg3_wildtype	DN94	11	5	10.417	0.479985
Nrg3_wildtype	DN94	12	7	13.836	0.505927
Nrg3_wildtype	DN94	13	3	10.013	0.299611
Nrg3_wildtype	DN94	14	2	12.643	0.15819
Nrg3_wildtype	DN94	15	3	10.551	0.284333
Nrg3_wildtype	DN94	16	8	13.051	0.61298
Nrg3_wildtype	DN94	17	7	14.5	0.482759
Nrg3_wildtype	DN94	18	4	8.727	0.458348
Nrg3_wildtype	DN94	19	5	12.636	0.395695
Nrg3_wildtype	DN94	20	3	10.046	0.298626
Nrg3_wildtype	DN94	21	4	10.188	0.392619
Nrg3_wildtype	DN94	22	6	12.856	0.466708
Nrg3_wildtype	DN94	23	5	14.205	0.351989
Nrg3_wildtype	DN94	24	6	8.932	0.671742
Nrg3_wildtype	DN94	25	4	12.347	0.323965
Nrg3_wildtype	DN94	26	2	6.696	0.298686
Nrg3_wildtype	DN94	27	5	16.111	0.310347
Nrg3_wildtype	DN94	28	7	13.678	0.511771
Nrg3_wildtype	DN94	29	3	12.092	0.248098
Nrg3_wildtype	DN94	30	10	22.508	0.444286
Nrg3_wildtype	DN94	31	3	14.285	0.210011
Nrg3_mutant	DN90	1	2	7.401	0.270234
Nrg3_mutant	DN90	2	12	12.498	0.960154
Nrg3_mutant	DN90	3	6	12.615	0.475624
Nrg3_mutant	DN90	4	5	12.222	0.409098
Nrg3_mutant	DN90	5	5	11.738	0.425967
Nrg3_mutant	DN90	6	7	15.051	0.465085
Nrg3_mutant	DN90	7	3	9.607	0.312272
Nrg3_mutant	DN90	8	3	11.555	0.259628
Nrg3_mutant	DN90	9	2	8.297	0.241051
Nrg3_mutant	DN90	10	6	11.066	0.542201
Nrg3_mutant	DN90	11	4	11.324	0.353232
Nrg3_mutant	DN90	12	4	13.93	0.28715
Nrg3_mutant	DN90	13	4	10.238	0.390701
Nrg3_mutant	DN90	14	2	12.822	0.155982
Nrg3_mutant	DN90	15	5	8.406	0.594813
Nrg3_mutant	DN90	16	8	15.304	0.522739
Nrg3_mutant	DN90	17	4	16.804	0.238039
Nrg3_mutant	DN90	18	4	9.079	0.440577
Nrg3_mutant	DN90	19	3	15.494	0.193623
Nrg3_mutant	DN90	20	5	13.949	0.358449
Nrg3_mutant	DN90	21	3	11.02	0.272232
Nrg3_mutant	DN90	22	5	13.142	0.38046
Nrg3_mutant	DN90	23	2	10.861	0.184145
Nrg3_mutant	DN90	24	4	8.34	0.479616
Nrg3_mutant	DN90	25	5	14.283	0.350067
Nrg3_mutant	DN90	26	5	16.82	0.297265
Nrg3_mutant	DN90	27	4	9.553	0.418717
Nrg3_mutant	DN90	28	3	10.2	0.294118
Nrg3_mutant	DN90	29	9	18.485	0.486881
Nrg3_mutant	DN90	30	2	12.12	0.165017
Nrg3_mutant	DN90	31	4	14.087	0.28395
Nrg3_mutant	DN90	32	5	10.245	0.488043
Nrg3_mutant	DN90	33	3	15.469	0.193936
Nrg3_wildtype	DN95	1	2	11.477	0.174262
Nrg3_wildtype	DN95	2	4	11.879	0.336729
Nrg3_wildtype	DN95	3	6	13.82	0.434153
Nrg3_wildtype	DN95	4	6	17.626	0.340406
Nrg3_wildtype	DN95	5	7	16.334	0.428554
Nrg3_wildtype	DN95	6	5	13.046	0.383259
Nrg3_wildtype	DN95	7	2	13.62	0.146843
Nrg3_wildtype	DN95	8	9	18.429	0.488361
Nrg3_wildtype	DN95	9	3	9.682	0.309853
Nrg3_wildtype	DN95	10	3	20.612	0.145546
Nrg3_wildtype	DN95	11	3	10.075	0.297767
Nrg3_wildtype	DN95	12	6	18.329	0.32735
Nrg3_wildtype	DN95	13	2	11.57	0.172861
Nrg3_wildtype	DN95	14	4	13.585	0.294442
Nrg3_wildtype	DN95	15	7	15.606	0.448545
Nrg3_wildtype	DN95	16	6	16.136	0.371839
Nrg3_wildtype	DN95	17	2	17.315	0.115507
Nrg3_wildtype	DN95	18	3	14.513	0.206711
Nrg3_wildtype	DN95	19	4	13.945	0.286841
Nrg3_wildtype	DN95	20	6	16.114	0.372347
Nrg3_mutant	DN96	1	1	10.578	0.0945358
Nrg3_mutant	DN96	2	3	13.312	0.225361
Nrg3_mutant	DN96	3	10	12.203	0.819471
Nrg3_mutant	DN96	4	6	8.645	0.694043
Nrg3_mutant	DN96	5	3	10.399	0.288489
Nrg3_mutant	DN96	6	2	12.874	0.155352
Nrg3_mutant	DN96	7	7	15.21	0.460224
Nrg3_mutant	DN96	8	6	12.68	0.473186
Nrg3_mutant	DN96	9	3	8.662	0.34634
Nrg3_mutant	DN96	10	2	9.8	0.204082
Nrg3_mutant	DN96	11	3	8.276	0.362494
Nrg3_mutant	DN96	12	8	14.59	0.548321
Nrg3_mutant	DN96	13	3	11.223	0.267308
Nrg3_mutant	DN96	14	2	9.208	0.217202
Nrg3_mutant	DN96	15	10	17.929	0.557756
Nrg3_mutant	DN96	16	5	13.222	0.378158
Nrg3_mutant	DN96	17	7	15.863	0.441278
Nrg3_mutant	DN96	18	2	10.359	0.193069
Nrg3_mutant	DN96	19	2	16.837	0.118786
Nrg3_mutant	DN96	20	6	15.81	0.379507
Nrg3_mutant	DN96	21	2	10.141	0.197219
Nrg3_mutant	DN96	22	3	12.278	0.244339
Nrg3_mutant	DN96	23	5	14.96	0.334225
Nrg3_mutant	DN96	24	4	10.214	0.391619
Nrg3_mutant	DN96	25	8	18.007	0.444272
Nrg3_mutant	DN96	26	6	16.803	0.357079
Nrg3_mutant	DN96	27	3	16.441	0.182471
Nrg3_mutant	DN96	28	3	10.628	0.282273
Nrg3_wildtype	DN92	1	3	13.822	0.217045
Nrg3_wildtype	DN92	2	3	13.33	0.225056
Nrg3_wildtype	DN92	3	9	16.94	0.531287
Nrg3_wildtype	DN92	4	6	11.263	0.532718
Nrg3_wildtype	DN92	5	4	13.796	0.289939
Nrg3_wildtype	DN92	6	3	17.974	0.166908
Nrg3_wildtype	DN92	7	5	12.393	0.403454
Nrg3_wildtype	DN92	8	4	11.783	0.339472
Nrg3_wildtype	DN92	9	7	11.846	0.590917
Nrg3_wildtype	DN92	10	3	9.018	0.332668
Nrg3_wildtype	DN92	11	5	12.937	0.386488
Nrg3_wildtype	DN92	12	1	11.679	0.0856238
Nrg3_wildtype	DN92	13	4	7.304	0.547645
Nrg3_wildtype	DN92	14	2	10.839	0.184519
Nrg3_wildtype	DN92	15	2	14.094	0.141904
Nrg3_wildtype	DN92	16	2	8.519	0.234769
Nrg3_wildtype	DN92	17	7	18.388	0.380683
Nrg3_wildtype	DN92	18	5	15.474	0.323123
Nrg3_wildtype	DN92	19	7	11.379	0.615168
Nrg3_wildtype	DN92	20	5	14.868	0.336293
Nrg3_wildtype	DN92	21	3	9.872	0.30389
Nrg3_wildtype	DN92	22	5	10.436	0.479111
Nrg3_wildtype	DN92	23	5	16.46	0.303767
Nrg3_wildtype	DN92	24	3	13.722	0.218627
Nrg3_wildtype	DN92	25	3	11.991	0.250188
Nrg3_wildtype	DN92	26	2	10.043	0.199144
Nrg3_wildtype	DN92	27	7	11.369	0.615709
Nrg3_wildtype	DN92	28	1	8.738	0.114443
Nrg3_wildtype	DN92	29	3	13.307	0.225445
Nrg3_wildtype	DN92	30	7	9.589	0.730003
Nrg3_wildtype	DN92	31	4	11.374	0.351679
Nrg3_wildtype	DN92	32	4	10.53	0.379867
Nrg3_wildtype	DN92	33	3	14.297	0.209834
Nrg3_wildtype	DN92	34	7	16.002	0.437445
Nrg3_wildtype	DN92	35	4	17.595	0.227337
Nrg3_wildtype	DN92	36	6	12.681	0.473149
Nrg3_wildtype	DN92	37	2	14.061	0.142237
Nrg3_mutant	DN91	1	6	13.336	0.44991
Nrg3_mutant	DN91	2	4	21.331	0.187521
Nrg3_mutant	DN91	3	5	13.394	0.373301
Nrg3_mutant	DN91	4	2	14.62	0.136799
Nrg3_mutant	DN91	5	4	13.485	0.296626
Nrg3_mutant	DN91	6	5	14.77	0.338524
Nrg3_mutant	DN91	7	9	13.459	0.668698
Nrg3_mutant	DN91	8	3	13.709	0.218834
Nrg3_mutant	DN91	9	1	8.92	0.112108
Nrg3_mutant	DN91	10	1	10.16	0.0984252
Nrg3_mutant	DN91	11	4	8.446	0.473597
Nrg3_mutant	DN91	12	1	12.581	0.0794849
Nrg3_mutant	DN91	13	3	10.861	0.276218
Nrg3_mutant	DN91	14	7	16.754	0.417811
Nrg3_mutant	DN91	15	8	12.867	0.621746
Nrg3_mutant	DN91	16	4	9.79	0.40858
Nrg3_mutant	DN91	17	3	14.753	0.203348
Nrg3_mutant	DN91	18	5	18.936	0.264047
Nrg3_mutant	DN91	19	2	10.496	0.190549
Nrg3_mutant	DN91	20	3	10.765	0.278681
Nrg3_mutant	DN91	21	4	10.054	0.397852
Nrg3_mutant	DN91	22	6	15.827	0.379099
Nrg3_mutant	DN91	23	4	13.88	0.288184
Nrg3_mutant	DN91	24	5	13.283	0.376421
Nrg3_mutant	DN91	25	6	9.543	0.628733
Nrg3_mutant	DN91	26	2	13.13	0.152323
Nrg3_mutant	DN91	27	4	17.776	0.225023
Nrg3_mutant	DN91	28	2	14.758	0.13552
Nrg3_mutant	DN91	29	3	11.526	0.260281
Nrg3_mutant	DN91	30	7	17.234	0.406174
Nrg3_mutant	DN91	31	4	15.015	0.2664
Nrg3_wildtype	DN99	1	6	11.94	0.502513
Nrg3_wildtype	DN99	2	6	15.911	0.377098
Nrg3_wildtype	DN99	3	3	12.659	0.236986
Nrg3_wildtype	DN99	4	1	12.008	0.0832778
Nrg3_wildtype	DN99	5	5	9.361	0.534131
Nrg3_wildtype	DN99	6	2	16.005	0.124961
Nrg3_wildtype	DN99	7	6	14.795	0.405542
Nrg3_wildtype	DN99	8	2	8.785	0.227661
Nrg3_wildtype	DN99	9	3	13.76	0.218023
Nrg3_wildtype	DN99	10	9	15.275	0.589198
Nrg3_wildtype	DN99	11	4	11.735	0.340861
Nrg3_wildtype	DN99	12	4	9.33	0.428725
Nrg3_wildtype	DN99	13	3	11.359	0.264108
Nrg3_wildtype	DN99	14	3	16.891	0.177609
Nrg3_wildtype	DN99	15	4	11.613	0.344442
Nrg3_wildtype	DN99	16	5	14.53	0.344116
Nrg3_wildtype	DN99	17	10	17.303	0.577934
Nrg3_wildtype	DN99	18	6	17.626	0.340406
Nrg3_wildtype	DN99	19	4	14.62	0.273598
Nrg3_wildtype	DN99	20	6	9.586	0.625913
Nrg3_wildtype	DN99	21	4	18.213	0.219623
Nrg3_mutant	DN98	1	10	19.359	0.516556
Nrg3_mutant	DN98	2	2	14.82	0.134953
Nrg3_mutant	DN98	3	5	9.939	0.503069
Nrg3_mutant	DN98	4	3	8.832	0.339674
Nrg3_mutant	DN98	5	5	10.072	0.496426
Nrg3_mutant	DN98	6	4	10.292	0.388651
Nrg3_mutant	DN98	7	2	8.265	0.241984
Nrg3_mutant	DN98	8	7	11.948	0.585872
Nrg3_mutant	DN98	9	5	15.715	0.318167
Nrg3_mutant	DN98	10	4	15.238	0.262502
Nrg3_mutant	DN98	11	1	9.229	0.108354
Nrg3_mutant	DN98	12	4	15.431	0.259218
Nrg3_mutant	DN98	13	3	9.592	0.312761
Nrg3_mutant	DN98	14	3	9.048	0.331565
Nrg3_mutant	DN98	15	3	9.638	0.311268
