# Supplementary material for: Subcellular sorting of neuregulins controls the assembly of excitatory-inhibitory cortical circuits
Source: eLife. 2020 Dec 15;9:e57000. doi: 10.7554/eLife.57000 (PMC7755390; doi:10.7554/eLife.57000)
Supplement: Figure 1—figure supplement 5—source data 1. [file elife-57000-fig1-figsupp5-data1.xlsx]

## Sheet: PV_basket_synpases
Genotype	Brain	Cell	Count_syt2	Count_syt2_geph	Perimeter_Cell	Density_syt2	Density_syt2_geph
Nrg1_wildtype	DN104	1	17	1	45.17	0.376356	0.0221386
Nrg1_wildtype	DN104	2	10	1	39.679	0.252022	0.0252022
Nrg1_wildtype	DN104	3	16	1	47.518	0.336715	0.0210447
Nrg1_wildtype	DN104	4	15	1	45.207	0.331807	0.0221205
Nrg1_wildtype	DN104	5	22	12	47.444	0.463705	0.25293
Nrg1_wildtype	DN104	6	14	2	40.031	0.349729	0.0499613
Nrg1_wildtype	DN104	7	20	0	42.728	0.468077	0
Nrg1_wildtype	DN104	8	23	3	46.445	0.495209	0.0645925
Nrg1_wildtype	DN104	9	23	5	48.211	0.47707	0.103711
Nrg1_wildtype	DN104	10	15	2	41.527	0.361211	0.0481614
Nrg1_wildtype	DN104	11	15	1	45.689	0.328307	0.0218871
Nrg1_wildtype	DN104	12	19	0	34.937	0.543836	0
Nrg1_wildtype	DN104	13	12	0	38.235	0.313849	0
Nrg1_wildtype	DN104	14	16	0	41.102	0.389275	0
Nrg1_wildtype	DN104	15	11	0	38.288	0.287296	0
Nrg1_wildtype	DN104	16	31	7	56.05	0.553078	0.124888
Nrg1_wildtype	DN104	17	14	0	41.374	0.338377	0
Nrg1_wildtype	DN104	18	15	0	38.137	0.393319	0
Nrg1_wildtype	DN104	19	16	1	43.711	0.366041	0.0228775
Nrg1_wildtype	DN104	20	18	1	41.145	0.437477	0.0243043
Nrg1_wildtype	DN104	21	19	2	52.998	0.358504	0.0377373
Nrg1_wildtype	DN104	22	18	2	45.304	0.397316	0.0441462
Nrg1_wildtype	DN104	23	19	1	53.997	0.351871	0.0185195
Nrg1_wildtype	DN104	24	20	8	52.799	0.378795	0.151518
Nrg1_wildtype	DN104	25	14	0	46.826	0.298979	0
Nrg1_mutant	DN106	1	10	2	41.963	0.238305	0.047661
Nrg1_mutant	DN106	2	19	6	46.32	0.41019	0.129534
Nrg1_mutant	DN106	3	21	5	52.51	0.399924	0.09522
Nrg1_mutant	DN106	4	20	5	41.162	0.485885	0.121471
Nrg1_mutant	DN106	5	13	2	35.983	0.361282	0.0555818
Nrg1_mutant	DN106	6	16	5	36.486	0.438524	0.137039
Nrg1_mutant	DN106	7	21	2	45.753	0.458986	0.043713
Nrg1_mutant	DN106	8	15	6	38.778	0.386817	0.154727
Nrg1_mutant	DN106	9	16	4	45.303	0.353177	0.0882944
Nrg1_mutant	DN106	10	13	1	41.945	0.30993	0.0238407
Nrg1_mutant	DN106	11	9	4	41.83	0.215157	0.0956251
Nrg1_mutant	DN106	12	16	1	44.746	0.357574	0.0223484
Nrg1_mutant	DN106	13	9	1	43.08	0.208914	0.0232126
Nrg1_mutant	DN106	14	16	6	37.738	0.423976	0.158991
Nrg1_mutant	DN106	15	20	1	47.861	0.417877	0.0208938
Nrg1_mutant	DN106	16	15	1	40.46	0.370737	0.0247158
Nrg1_mutant	DN106	17	11	0	44.536	0.246991	0
Nrg1_mutant	DN106	18	18	0	47.967	0.375258	0
Nrg1_mutant	DN106	19	9	0	42.82	0.210182	0
Nrg1_mutant	DN106	20	21	0	41.747	0.50303	0
Nrg1_mutant	DN106	21	16	7	45.017	0.355421	0.155497
Nrg1_wildtype	DN105	1	11	1	40.288	0.273034	0.0248213
Nrg1_wildtype	DN105	2	9	0	41.089	0.219037	0
Nrg1_wildtype	DN105	3	5	0	36.835	0.13574	0
Nrg1_wildtype	DN105	4	12	1	43.057	0.2787	0.023225
Nrg1_wildtype	DN105	5	9	5	29.987	0.30013	0.166739
Nrg1_wildtype	DN105	6	9	0	35.776	0.251565	0
Nrg1_wildtype	DN105	7	18	2	46.647	0.385877	0.0428752
Nrg1_wildtype	DN105	8	10	1	43.826	0.228175	0.0228175
Nrg1_wildtype	DN105	9	19	2	40.887	0.464695	0.0489153
Nrg1_wildtype	DN105	10	18	0	43.229	0.416387	0
Nrg1_wildtype	DN105	11	19	4	50.309	0.377666	0.0795086
Nrg1_wildtype	DN105	12	16	3	50.259	0.318351	0.0596908
Nrg1_wildtype	DN105	13	21	7	49.295	0.426007	0.142002
Nrg1_wildtype	DN105	14	15	2	50.317	0.29811	0.039748
Nrg1_wildtype	DN105	15	20	2	42.938	0.465788	0.0465788
Nrg1_wildtype	DN105	16	10	1	44.749	0.223469	0.0223469
Nrg1_wildtype	DN105	17	19	5	54.129	0.351013	0.0923719
Nrg1_wildtype	DN105	18	9	1	40.883	0.22014	0.02446
Nrg1_wildtype	DN105	19	22	3	44.15	0.498301	0.0679502
Nrg1_wildtype	DN105	20	23	8	53.405	0.430671	0.149799
Nrg1_wildtype	DN105	21	15	7	45.208	0.3318	0.15484
Nrg1_wildtype	DN105	22	14	1	44.755	0.312814	0.0223439
Nrg1_wildtype	DN105	23	11	1	46.057	0.238834	0.0217122
Nrg1_mutant	DN107	1	21	7	49.915	0.420715	0.140238
Nrg1_mutant	DN107	2	17	5	42.153	0.403293	0.118616
Nrg1_mutant	DN107	3	11	1	43.046	0.255541	0.023231
Nrg1_mutant	DN107	4	24	9	47.542	0.504817	0.189306
Nrg1_mutant	DN107	5	8	0	33.942	0.235696	0
Nrg1_mutant	DN107	6	12	2	42.794	0.280413	0.0467355
Nrg1_mutant	DN107	7	18	0	47.916	0.375657	0
Nrg1_mutant	DN107	8	8	3	39.517	0.202445	0.0759167
Nrg1_mutant	DN107	9	12	0	37.535	0.319702	0
Nrg1_mutant	DN107	10	22	10	45.417	0.4844	0.220182
Nrg1_mutant	DN107	11	14	0	42.215	0.331636	0
Nrg1_mutant	DN107	12	12	2	41.955	0.286021	0.0476701
Nrg1_mutant	DN107	13	19	3	50.533	0.375992	0.0593671
Nrg1_mutant	DN107	14	15	4	44.391	0.337906	0.0901084
Nrg1_mutant	DN107	15	18	7	48.77	0.369079	0.143531
Nrg1_mutant	DN107	16	21	7	37.317	0.562746	0.187582
Nrg1_mutant	DN107	17	15	3	39.766	0.377207	0.0754413
Nrg1_mutant	DN107	18	18	11	36.652	0.491106	0.30012
Nrg1_mutant	DN107	19	15	1	48.03	0.312305	0.0208203
Nrg1_mutant	DN107	20	12	1	43.679	0.274732	0.0228943
Nrg1_mutant	DN107	21	7	0	44.714	0.156551	0
Nrg1_mutant	DN107	22	10	1	39.796	0.251282	0.0251282
Nrg1_mutant	DN107	23	14	1	40.718	0.343828	0.0245592
Nrg1_mutant	DN107	24	12	0	43.147	0.278119	0
Nrg1_mutant	DN107	25	11	1	39.129	0.281121	0.0255565
Nrg1_mutant	DN107	26	16	1	50.786	0.315047	0.0196905
Nrg1_mutant	DN107	27	20	2	46.982	0.425695	0.0425695
Nrg1_mutant	DN107	28	18	1	42.888	0.419698	0.0233165
Nrg1_mutant	DN107	29	14	3	45.468	0.307909	0.0659805
Nrg1_wildtype	DN111	1	18	7	42.953	0.419063	0.162969
Nrg1_wildtype	DN111	2	19	2	40.426	0.469995	0.0494731
Nrg1_wildtype	DN111	3	23	3	43.519	0.528505	0.0689354
Nrg1_wildtype	DN111	4	15	5	44.119	0.33999	0.11333
Nrg1_wildtype	DN111	5	13	1	47.437	0.274048	0.0210806
Nrg1_wildtype	DN111	6	13	1	41.536	0.312982	0.0240755
Nrg1_wildtype	DN111	7	18	1	37.754	0.476771	0.0264873
Nrg1_wildtype	DN111	8	18	3	43.131	0.417333	0.0695555
Nrg1_wildtype	DN111	9	21	4	38.212	0.549566	0.104679
Nrg1_wildtype	DN111	10	10	3	34.832	0.287092	0.0861277
Nrg1_wildtype	DN111	11	16	4	38.897	0.411343	0.102836
Nrg1_wildtype	DN111	12	15	3	48.581	0.308763	0.0617525
Nrg1_wildtype	DN111	13	12	4	32.087	0.373983	0.124661
Nrg1_wildtype	DN111	14	15	1	44.847	0.334471	0.022298
Nrg1_wildtype	DN111	15	15	4	42.749	0.350885	0.0935694
Nrg1_wildtype	DN111	16	6	0	44.29	0.135471	0
Nrg1_wildtype	DN111	17	23	9	51.446	0.447071	0.174941
Nrg1_wildtype	DN111	18	18	2	39.308	0.457922	0.0508802
Nrg1_wildtype	DN111	19	14	6	29.014	0.482526	0.206797
Nrg1_wildtype	DN111	20	17	2	39.539	0.429955	0.050583
Nrg1_wildtype	DN111	21	13	0	47.108	0.275962	0
Nrg1_wildtype	DN111	22	14	1	38.165	0.366828	0.026202
Nrg1_wildtype	DN111	23	13	1	49.015	0.265225	0.0204019
Nrg1_wildtype	DN111	24	14	1	38.063	0.367811	0.0262722
Nrg1_wildtype	DN111	25	19	8	52.297	0.36331	0.152972
Nrg1_wildtype	DN111	26	11	2	45.689	0.240758	0.0437742
Nrg1_wildtype	DN111	27	12	1	40.791	0.294183	0.0245152
Nrg1_wildtype	DN111	28	19	1	42.365	0.448483	0.0236044
Nrg1_mutant	DN112	1	18	4	43.668	0.412201	0.0916003
Nrg1_mutant	DN112	2	13	0	39.268	0.331058	0
Nrg1_mutant	DN112	3	19	7	40.13	0.473461	0.174433
Nrg1_mutant	DN112	4	16	2	49.328	0.324359	0.0405449
Nrg1_mutant	DN112	5	15	1	42.206	0.3554	0.0236933
Nrg1_mutant	DN112	6	10	0	42.47	0.23546	0
Nrg1_mutant	DN112	7	20	1	50.675	0.394672	0.0197336
Nrg1_mutant	DN112	8	15	1	39.819	0.376705	0.0251136
Nrg1_mutant	DN112	9	15	2	46.021	0.325938	0.0434584
Nrg1_mutant	DN112	10	17	3	46.347	0.366798	0.0647291
Nrg1_mutant	DN112	11	15	0	39.09	0.38373	0
Nrg1_mutant	DN112	12	12	0	38.061	0.315283	0
Nrg1_mutant	DN112	13	11	0	40.688	0.27035	0
Nrg1_mutant	DN112	14	17	6	41.089	0.413736	0.146024
Nrg1_mutant	DN112	15	8	0	35.914	0.222754	0
Nrg1_mutant	DN112	16	16	7	33.168	0.482393	0.211047
Nrg1_mutant	DN112	17	12	7	34.178	0.351103	0.20481
Nrg1_mutant	DN112	18	16	1	41.472	0.385802	0.0241127
Nrg1_mutant	DN112	19	9	0	35.361	0.254518	0
Nrg1_mutant	DN112	20	27	0	48.251	0.559574	0
Nrg1_mutant	DN112	21	19	4	38.611	0.492088	0.103597
Nrg1_mutant	DN112	22	11	1	34.245	0.321215	0.0292013
Nrg1_mutant	DN112	23	15	3	37.965	0.395101	0.0790201
Nrg1_mutant	DN112	24	13	5	41.422	0.313843	0.120709
Nrg1_mutant	DN112	25	24	11	49.392	0.485909	0.222708
Nrg1_mutant	DN112	26	16	1	42.994	0.372145	0.0232591
Nrg1_mutant	DN112	27	14	0	37.881	0.369578	0
Nrg1_mutant	DN112	28	16	0	43.434	0.368375	0
Nrg1_mutant	DN112	29	18	3	42.694	0.421605	0.0702675
Nrg1_mutant	DN112	30	17	0	43.706	0.388963	0
Nrg1_mutant	DN112	31	18	1	47.808	0.376506	0.020917
Nrg1_mutant	DN112	32	20	3	49.309	0.405605	0.0608408
Nrg1_wildtype	DN113	1	18	6	44.506	0.40444	0.134813
Nrg1_wildtype	DN113	2	18	2	48.588	0.370462	0.0411624
Nrg1_wildtype	DN113	3	11	2	41.619	0.264302	0.048055
Nrg1_wildtype	DN113	4	10	1	46.951	0.212988	0.0212988
Nrg1_wildtype	DN113	5	14	0	40.53	0.345423	0
Nrg1_wildtype	DN113	6	17	2	37.466	0.453745	0.0533817
Nrg1_wildtype	DN113	7	14	3	51.443	0.272146	0.058317
Nrg1_wildtype	DN113	8	20	9	42.051	0.475613	0.214026
Nrg1_wildtype	DN113	9	15	2	45.045	0.333	0.0444
Nrg1_wildtype	DN113	10	8	1	33.582	0.238223	0.0297779
Nrg1_wildtype	DN113	11	16	7	39.656	0.40347	0.176518
Nrg1_wildtype	DN113	12	12	0	41.24	0.29098	0
Nrg1_wildtype	DN113	13	13	2	35.19	0.369423	0.0568343
Nrg1_wildtype	DN113	14	8	3	37.663	0.21241	0.0796538
Nrg1_wildtype	DN113	15	20	13	39.424	0.507305	0.329748
Nrg1_wildtype	DN113	16	12	8	37.005	0.324281	0.216187
Nrg1_wildtype	DN113	17	17	2	41.659	0.408075	0.0480088
Nrg1_wildtype	DN113	18	21	2	42.343	0.49595	0.0472333
Nrg1_wildtype	DN113	19	10	1	37.506	0.266624	0.0266624
Nrg1_wildtype	DN113	20	10	0	41.548	0.240685	0
Nrg1_wildtype	DN113	21	20	3	39.792	0.502614	0.075392
Nrg1_wildtype	DN113	22	9	0	42.424	0.212144	0
Nrg1_wildtype	DN113	23	16	0	37.308	0.428862	0
Nrg1_wildtype	DN113	24	13	2	44.808	0.290127	0.0446349
Nrg1_wildtype	DN113	25	14	1	42.694	0.327915	0.0234225
Nrg1_wildtype	DN113	26	23	11	46.068	0.499262	0.238777
Nrg1_wildtype	DN113	27	17	2	51.827	0.328014	0.0385899
Nrg1_wildtype	DN113	28	19	0	44.544	0.426545	0
Nrg1_wildtype	DN113	29	20	6	50.813	0.3936	0.11808
Nrg1_wildtype	DN113	30	11	6	43.412	0.253386	0.138211
Nrg1_wildtype	DN113	31	12	2	43.232	0.277572	0.046262
Nrg1_wildtype	DN113	32	6	0	43.171	0.138982	0
Nrg1_mutant	DN114	1	10	2	38.517	0.259626	0.0519251
Nrg1_mutant	DN114	2	12	0	39.333	0.305087	0
Nrg1_mutant	DN114	3	10	3	38.728	0.258211	0.0774633
Nrg1_mutant	DN114	4	14	2	42.869	0.326576	0.0466538
Nrg1_mutant	DN114	5	24	1	43.397	0.553034	0.0230431
Nrg1_mutant	DN114	6	17	1	43.308	0.392537	0.0230904
Nrg1_mutant	DN114	7	8	3	32.806	0.243858	0.0914467
Nrg1_mutant	DN114	8	17	0	42.812	0.397085	0
Nrg1_mutant	DN114	9	21	4	50.826	0.413174	0.0786999
Nrg1_mutant	DN114	10	16	0	44.693	0.357998	0
Nrg1_mutant	DN114	11	20	3	43.14	0.463607	0.069541
Nrg1_mutant	DN114	12	10	0	39.727	0.251718	0
Nrg1_mutant	DN114	13	18	0	43.858	0.410415	0
Nrg1_mutant	DN114	14	15	3	50.082	0.299509	0.0599018
Nrg1_mutant	DN114	15	21	7	50.689	0.414291	0.138097
Nrg1_mutant	DN114	16	12	2	42.948	0.279408	0.0465679
Nrg1_mutant	DN114	17	20	3	49.673	0.402633	0.060395
Nrg1_mutant	DN114	18	19	4	43.442	0.437365	0.0920768
Nrg1_mutant	DN114	19	17	1	48.225	0.352514	0.0207361
Nrg1_mutant	DN114	20	20	4	46.464	0.430441	0.0860882
Nrg1_mutant	DN114	21	13	0	43.294	0.300273	0
Nrg1_mutant	DN114	22	19	4	44.332	0.428584	0.0902283
Nrg1_mutant	DN114	23	23	8	40.355	0.569942	0.198241
Nrg1_mutant	DN114	24	11	2	42.937	0.256189	0.0465799
Nrg1_mutant	DN114	25	12	4	41.937	0.286144	0.0953812
Nrg1_mutant	DN114	26	16	2	45.8	0.349345	0.0436681
Nrg1_mutant	DN114	27	19	2	45.58	0.416849	0.0438789
Nrg3_wildtype	DN94	1	14	2	34.32	0.407925	0.0582751
Nrg3_wildtype	DN94	2	8	1	45.973	0.174015	0.0217519
Nrg3_wildtype	DN94	3	14	1	44.343	0.315721	0.0225515
Nrg3_wildtype	DN94	4	10	1	35.091	0.284973	0.0284973
Nrg3_wildtype	DN94	5	17	2	41.891	0.405815	0.047743
Nrg3_wildtype	DN94	6	15	3	33.148	0.452516	0.0905032
Nrg3_wildtype	DN94	7	14	4	35.871	0.390287	0.111511
Nrg3_wildtype	DN94	8	22	11	52.186	0.421569	0.210785
Nrg3_wildtype	DN94	9	21	4	46.282	0.45374	0.0864267
Nrg3_wildtype	DN94	10	17	4	46.753	0.363613	0.085556
Nrg3_wildtype	DN94	11	11	0	44.234	0.248677	0
Nrg3_wildtype	DN94	12	13	0	47.944	0.27115	0
Nrg3_wildtype	DN94	13	13	3	35.248	0.368815	0.0851112
Nrg3_wildtype	DN94	14	15	2	41.661	0.360049	0.0480065
Nrg3_wildtype	DN94	15	10	2	39.074	0.255925	0.0511849
Nrg3_wildtype	DN94	16	18	2	42.502	0.423509	0.0470566
Nrg3_mutant	DN90	1	16	2	42.698	0.374725	0.0468406
Nrg3_mutant	DN90	2	14	3	40.011	0.349904	0.0749794
Nrg3_mutant	DN90	3	22	4	52.962	0.415392	0.0755258
Nrg3_mutant	DN90	4	13	2	38.193	0.340377	0.0523656
Nrg3_mutant	DN90	5	19	5	47.158	0.402901	0.106027
Nrg3_mutant	DN90	6	16	2	46.362	0.34511	0.0431388
Nrg3_mutant	DN90	7	21	5	52.327	0.401322	0.095553
Nrg3_mutant	DN90	8	26	2	47.347	0.549137	0.0422413
Nrg3_mutant	DN90	9	18	11	49.504	0.363607	0.222204
Nrg3_mutant	DN90	10	20	6	58.85	0.339847	0.101954
Nrg3_mutant	DN90	11	20	0	46.306	0.431909	0
Nrg3_mutant	DN90	12	19	2	42.342	0.448727	0.0472344
Nrg3_mutant	DN90	13	13	0	42.325	0.307147	0
Nrg3_mutant	DN90	14	13	2	35.631	0.364851	0.0561309
Nrg3_mutant	DN90	15	14	3	43.752	0.319985	0.0685683
Nrg3_mutant	DN90	16	11	1	46.979	0.234147	0.0212861
Nrg3_mutant	DN90	17	15	0	43.434	0.345352	0
Nrg3_mutant	DN90	18	21	3	41.099	0.510961	0.0729945
Nrg3_mutant	DN90	19	22	10	42.249	0.520722	0.236692
Nrg3_mutant	DN90	20	21	4	42.407	0.495201	0.0943241
Nrg3_mutant	DN90	21	22	1	49.665	0.442968	0.0201349
Nrg3_mutant	DN90	22	17	0	43.685	0.38915	0
Nrg3_mutant	DN90	23	15	2	42.715	0.351165	0.046822
Nrg3_mutant	DN90	24	10	2	34.277	0.291741	0.0583482
Nrg3_wildtype	DN95	1	20	8	51.938	0.385075	0.15403
Nrg3_wildtype	DN95	2	12	2	47.137	0.254577	0.0424295
Nrg3_wildtype	DN95	3	15	1	47.173	0.317979	0.0211986
Nrg3_wildtype	DN95	4	14	0	45.047	0.310787	0
Nrg3_wildtype	DN95	5	15	3	46.719	0.321069	0.0642137
Nrg3_wildtype	DN95	6	16	3	49.371	0.324077	0.0607644
Nrg3_wildtype	DN95	7	15	3	37.433	0.400716	0.0801432
Nrg3_wildtype	DN95	8	13	1	48.865	0.266039	0.0204645
Nrg3_wildtype	DN95	9	10	2	41.593	0.240425	0.048085
Nrg3_wildtype	DN95	10	9	0	45.281	0.198759	0
Nrg3_wildtype	DN95	11	20	3	50.001	0.399992	0.0599988
Nrg3_wildtype	DN95	12	29	11	58.119	0.498976	0.189267
Nrg3_wildtype	DN95	13	15	1	47.877	0.313303	0.0208869
Nrg3_wildtype	DN95	14	14	2	51.495	0.271871	0.0388387
Nrg3_wildtype	DN95	15	18	2	50.869	0.35385	0.0393167
Nrg3_wildtype	DN95	16	18	2	47.587	0.378255	0.0420283
Nrg3_wildtype	DN95	17	13	2	47.415	0.274175	0.0421807
Nrg3_wildtype	DN95	18	6	1	41.84	0.143403	0.0239006
Nrg3_wildtype	DN95	19	18	2	41.4	0.434783	0.0483092
Nrg3_wildtype	DN95	20	25	3	48.772	0.512589	0.0615107
Nrg3_wildtype	DN95	21	14	2	47.516	0.294638	0.0420911
Nrg3_wildtype	DN95	22	21	7	49.067	0.427986	0.142662
Nrg3_wildtype	DN95	23	13	2	46.734	0.27817	0.0427954
Nrg3_wildtype	DN95	24	23	2	48.696	0.472318	0.0410711
Nrg3_wildtype	DN95	25	18	3	57.283	0.314229	0.0523716
Nrg3_wildtype	DN95	26	13	3	46.779	0.277902	0.0641313
Nrg3_mutant	DN96	1	5	0	44.9972	0.111118	0
Nrg3_mutant	DN96	2	15	2	48.423	0.30977	0.0413027
Nrg3_mutant	DN96	3	17	5	42.059	0.404194	0.118881
Nrg3_mutant	DN96	4	8	1	34.632	0.231	0.028875
Nrg3_mutant	DN96	5	13	5	47.039	0.276366	0.106295
Nrg3_mutant	DN96	6	20	3	46.228	0.432638	0.0648957
Nrg3_mutant	DN96	7	20	5	46.903	0.426412	0.106603
Nrg3_mutant	DN96	8	23	1	51.14	0.449746	0.0195542
Nrg3_mutant	DN96	9	17	1	44.13	0.385225	0.0226603
Nrg3_mutant	DN96	10	19	5	51.829	0.36659	0.0964711
Nrg3_mutant	DN96	11	7	0	48.751	0.143587	0
Nrg3_mutant	DN96	12	14	4	39.701	0.352636	0.100753
Nrg3_mutant	DN96	13	23	5	48.822	0.471099	0.102413
Nrg3_mutant	DN96	14	11	0	46.365	0.237248	0
Nrg3_mutant	DN96	15	16	9	46.579	0.343502	0.19322
Nrg3_mutant	DN96	16	17	3	43.386	0.391831	0.0691467
Nrg3_mutant	DN96	17	20	3	38.758	0.516022	0.0774034
Nrg3_mutant	DN96	18	18	0	43.957	0.409491	0
Nrg3_mutant	DN96	19	18	4	44.77	0.402055	0.0893455
Nrg3_mutant	DN96	20	18	2	51.823	0.347336	0.0385929
Nrg3_mutant	DN96	21	17	1	44.557	0.381534	0.0224432
Nrg3_mutant	DN96	22	16	1	44.138	0.362499	0.0226562
Nrg3_mutant	DN96	23	12	0	46.231	0.259566	0
Nrg3_mutant	DN96	24	12	2	43.427	0.276326	0.0460543
Nrg3_mutant	DN96	25	23	2	49.167	0.467793	0.0406777
Nrg3_mutant	DN96	26	18	2	54.152	0.332398	0.0369331
Nrg3_mutant	DN96	27	16	5	42.777	0.374033	0.116885
Nrg3_wildtype	DN99	1	15	2	41.364	0.362634	0.0483512
Nrg3_wildtype	DN99	2	14	0	46.162	0.30328	0
Nrg3_wildtype	DN99	3	19	4	41.042	0.46294	0.0974611
Nrg3_wildtype	DN99	4	18	6	43.553	0.41329	0.137763
Nrg3_wildtype	DN99	5	19	3	49.765	0.381794	0.0602833
Nrg3_wildtype	DN99	6	19	1	43.018	0.441676	0.0232461
Nrg3_wildtype	DN99	7	15	1	48.726	0.307844	0.0205229
Nrg3_wildtype	DN99	8	23	7	50.463	0.455779	0.138715
Nrg3_wildtype	DN99	9	14	5	38.111	0.367348	0.131196
Nrg3_wildtype	DN99	10	20	2	50.121	0.399034	0.0399034
Nrg3_wildtype	DN99	11	12	1	38.427	0.31228	0.0260234
Nrg3_wildtype	DN99	12	10	0	38.608	0.259014	0
Nrg3_wildtype	DN99	13	10	1	41.17	0.242895	0.0242895
Nrg3_wildtype	DN99	14	17	3	44.327	0.383513	0.0676788
Nrg3_wildtype	DN99	15	27	6	43.809	0.616312	0.136958
Nrg3_wildtype	DN99	16	13	1	43.311	0.300155	0.0230888
Nrg3_wildtype	DN99	17	16	3	43.76	0.365631	0.0685558
Nrg3_wildtype	DN99	18	15	6	40.151	0.37359	0.149436
Nrg3_wildtype	DN99	19	6	0	39.499	0.151903	0
Nrg3_wildtype	DN99	20	18	4	42.409	0.424438	0.0943196
Nrg3_wildtype	DN99	21	21	5	48.155	0.436092	0.103831
Nrg3_wildtype	DN99	22	18	1	44.749	0.402244	0.0223469
Nrg3_wildtype	DN99	23	15	1	47.985	0.312598	0.0208398
Nrg3_wildtype	DN99	24	20	2	51.784	0.38622	0.038622
Nrg3_wildtype	DN99	25	23	5	38.922	0.590925	0.128462
Nrg3_wildtype	DN99	26	11	0	40.609	0.270876	0
Nrg3_wildtype	DN99	27	15	3	44.596	0.336353	0.0672706
Nrg3_wildtype	DN99	28	15	2	41.9	0.357995	0.0477327
Nrg3_mutant	DN98	1	15	1	47.873	0.313329	0.0208886
Nrg3_mutant	DN98	2	11	3	48.245	0.228003	0.0621826
Nrg3_mutant	DN98	3	11	1	47.531	0.231428	0.0210389
Nrg3_mutant	DN98	4	17	3	56.918	0.298675	0.0527074
Nrg3_mutant	DN98	5	17	1	48.767	0.348596	0.0205057
Nrg3_mutant	DN98	6	20	4	40.053	0.499338	0.0998677
Nrg3_mutant	DN98	7	20	4	40.959	0.488293	0.0976586
Nrg3_mutant	DN98	8	18	10	47.883	0.375916	0.208842
Nrg3_mutant	DN98	9	8	0	41.499	0.192776	0
Nrg3_mutant	DN98	10	19	3	42.158	0.450686	0.0711609
Nrg3_mutant	DN98	11	15	5	43.315	0.3463	0.115433
Nrg3_mutant	DN98	12	19	3	44.177	0.430088	0.0679086
Nrg3_mutant	DN98	13	17	3	43.601	0.389899	0.0688058
Nrg3_mutant	DN98	14	18	15	53.232	0.338142	0.281785
Nrg3_mutant	DN98	15	14	0	47.21	0.296547	0
Nrg3_mutant	DN98	16	17	1	49.478	0.343587	0.020211
Nrg3_mutant	DN98	17	20	2	49.523	0.403853	0.0403853
Nrg3_mutant	DN98	18	15	4	41.777	0.359049	0.0957465
Nrg3_mutant	DN98	19	7	0	44.77	0.156355	0
Nrg3_mutant	DN98	20	13	0	44.997	0.288908	0
Nrg3_mutant	DN98	21	17	2	43.052	0.394871	0.0464554
Nrg3_mutant	DN98	22	21	1	46.376	0.45282	0.0215629
Nrg3_mutant	DN98	23	16	7	44.72	0.357782	0.15653
Nrg3_mutant	DN98	24	10	1	35.628	0.280678	0.0280678
Nrg3_mutant	DN98	25	8	0	40.581	0.197137	0
Nrg3_mutant	DN98	26	11	0	43.208	0.254582	0
Nrg3_mutant	DN98	27	17	2	50.866	0.334211	0.039319
Nrg3_mutant	DN98	28	24	5	53.235	0.450831	0.0939232
Nrg3_mutant	DN98	29	22	1	44.331	0.496267	0.0225576
