# Supplementary material for: Subcellular sorting of neuregulins controls the assembly of excitatory-inhibitory cortical circuits
Source: eLife. 2020 Dec 15;9:e57000. doi: 10.7554/eLife.57000 (PMC7755390; doi:10.7554/eLife.57000)
Supplement: Figure 1—figure supplement 6—source data 1. [file elife-57000-fig1-figsupp6-data1.xlsx]

## Sheet: Density_tdT_cells
Genotype	Brain	ROI	Area_ROI	Count_tdt_cells	Density_tdt_cells
Nrg1_wildtype	DN104	1	393608	131	332.819
Nrg1_wildtype	DN104	2	283978	105	369.748
Nrg1_wildtype	DN104	3	315239	144	456.796
Nrg1_wildtype	DN104	4	337813	129	381.868
Nrg1_wildtype	DN105	1	391365	155	396.05
Nrg1_wildtype	DN105	2	358446	117	326.409
Nrg1_wildtype	DN105	3	369000	147	398.374
Nrg1_wildtype	DN105	4	388382	143	368.194
Nrg1_wildtype	DN111	1	370208	147	397.074
Nrg1_wildtype	DN111	2	357822	132	368.898
Nrg1_wildtype	DN111	3	328938	134	407.371
Nrg1_wildtype	DN115	1	381293	143	375.04
Nrg1_wildtype	DN115	2	347959	123	353.49
Nrg1_wildtype	DN115	3	351122	145	412.961
Nrg1_wildtype	DN118	1	392023	142	362.223
Nrg1_wildtype	DN118	2	344319	129	374.652
Nrg1_wildtype	DN118	3	375861	151	401.744
Nrg1_wildtype	DN118	4	360436	139	385.645
Nrg1_mutant	DN106	1	370060	142	383.721
Nrg1_mutant	DN106	2	350382	141	402.418
Nrg1_mutant	DN106	3	320525	120	374.386
Nrg1_mutant	DN106	4	347460	134	385.655
Nrg1_mutant	DN107	1	377563	129	341.664
Nrg1_mutant	DN107	2	359683	146	405.913
Nrg1_mutant	DN107	3	328508	121	368.332
Nrg1_mutant	DN107	4	363300	144	396.367
Nrg1_mutant	DN112	1	369929	138	373.045
Nrg1_mutant	DN112	2	365399	145	396.827
Nrg1_mutant	DN112	3	392437	151	384.775
Nrg1_mutant	DN112	4	317573	125	393.61
Nrg1_mutant	DN114	1	345558	129	373.31
Nrg1_mutant	DN114	2	350944	144	410.322
Nrg1_mutant	DN114	3	327141	120	366.814
Nrg1_mutant	DN117	1	419365	142	338.607
Nrg1_mutant	DN117	2	311803	119	381.651
Nrg1_mutant	DN117	3	330542	132	399.345
Nrg3_wildtype	DN93	1	321405	122	379.583
Nrg3_wildtype	DN93	2	362395	139	383.559
Nrg3_wildtype	DN93	3	376361	129	342.756
Nrg3_wildtype	DN93	4	308522	116	375.986
Nrg3_wildtype	DN94	1	353039	144	407.886
Nrg3_wildtype	DN94	2	362129	143	394.887
Nrg3_wildtype	DN94	3	364143	129	354.256
Nrg3_wildtype	DN95	1	322078	123	381.895
Nrg3_wildtype	DN95	2	352921	134	379.689
Nrg3_wildtype	DN95	3	326063	127	389.495
Nrg3_wildtype	DN95	4	293455	118	402.106
Nrg3_wildtype	DN92	1	296710	133	448.249
Nrg3_wildtype	DN92	2	359215	109	303.44
Nrg3_wildtype	DN92	3	334345	124	370.875
Nrg3_wildtype	DN92	4	328401	123	374.542
Nrg3_wildtype	DN100	1	383694	147	383.118
Nrg3_wildtype	DN100	2	312573	136	435.099
Nrg3_wildtype	DN100	3	386755	141	364.572
Nrg3_mutant	DN89	1	288098	111	385.286
Nrg3_mutant	DN89	2	279778	121	432.485
Nrg3_mutant	DN89	3	292273	104	355.832
Nrg3_mutant	DN89	4	265782	103	387.535
Nrg3_mutant	DN90	1	321818	123	382.203
Nrg3_mutant	DN90	2	367706	137	372.58
Nrg3_mutant	DN90	3	321106	117	364.366
Nrg3_mutant	DN90	4	307018	113	368.057
Nrg3_mutant	DN96	1	379719	138	363.427
Nrg3_mutant	DN96	2	313965	127	404.503
Nrg3_mutant	DN96	3	307615	116	377.094
Nrg3_mutant	DN91	1	308303	135	437.881
Nrg3_mutant	DN91	2	347210	115	331.212
Nrg3_mutant	DN91	3	351327	131	372.871
Nrg3_mutant	DN91	4	287320	119	414.173
Nrg3_mutant	DN97	1	369859	147	397.449
Nrg3_mutant	DN97	2	353282	139	393.453
Nrg3_mutant	DN97	3	346306	126	363.84
