# Supplementary material for: Subcellular sorting of neuregulins controls the assembly of excitatory-inhibitory cortical circuits
Source: eLife. 2020 Dec 15;9:e57000. doi: 10.7554/eLife.57000 (PMC7755390; doi:10.7554/eLife.57000)
Supplement: Figure 1—figure supplement 7—source data 1. [file elife-57000-fig1-figsupp7-data1.xlsx]

## Sheet: Sheet1
Genotype	Brain	Cell	Perimeter_cell	Count_vglut1_psd95_notdt	Density_vglut1_pds95_notdt
Nrg1_wildtype	DN104	1	42.976	0	0
Nrg1_wildtype	DN104	2	52.022	-1	-0.0192226
Nrg1_wildtype	DN104	3	50.445	1	0.0198236
Nrg1_wildtype	DN104	4	61.88	4	0.0646412
Nrg1_wildtype	DN104	5	38.036	1	0.0262909
Nrg1_wildtype	DN104	6	55.269	4	0.0723733
Nrg1_wildtype	DN104	7	56.074	1	0.0178336
Nrg1_wildtype	DN104	8	42.314	-2	-0.0472657
Nrg1_wildtype	DN104	9	38.669	1	0.0258605
Nrg1_wildtype	DN104	10	58.429	8	0.136918
Nrg1_wildtype	DN104	11	48.33	3	0.0620732
Nrg1_wildtype	DN104	12	59.114	3	0.0507494
Nrg1_wildtype	DN104	13	52.443	3	0.057205
Nrg1_wildtype	DN104	14	47.097	5	0.106164
Nrg1_wildtype	DN104	15	47.15	9	0.19088
Nrg1_wildtype	DN104	16	47.469	0	0
Nrg1_wildtype	DN104	17	61.592	9	0.146123
Nrg1_wildtype	DN104	18	56.476	1	0.0177066
Nrg1_wildtype	DN104	19	67.64	12	0.17741
Nrg1_wildtype	DN104	20	56.843	3	0.0527769
Nrg1_wildtype	DN104	21	47.735	5	0.104745
Nrg1_wildtype	DN104	22	51.387	3	0.0583805
Nrg1_wildtype	DN104	23	49.826	3	0.0602095
Nrg1_wildtype	DN105	1	51.266	8	0.156049
Nrg1_wildtype	DN105	2	48.169	2	0.0415205
Nrg1_wildtype	DN105	3	45.173	3	0.0664114
Nrg1_wildtype	DN105	4	54.001	2	0.0370364
Nrg1_wildtype	DN105	5	49.707	0	0
Nrg1_wildtype	DN105	6	39.961	1	0.0250244
Nrg1_wildtype	DN105	7	50.67	1	0.0197355
Nrg1_wildtype	DN105	8	52.098	3	0.0575838
Nrg1_wildtype	DN105	9	37.051	3	0.0809695
Nrg1_wildtype	DN105	10	39.922	4	0.100195
Nrg1_wildtype	DN105	11	42.146	-2	-0.0474541
Nrg1_wildtype	DN105	12	41.825	1	0.0239091
Nrg1_wildtype	DN105	13	45.022	2	0.0444227
Nrg1_wildtype	DN105	14	37.343	3	0.0803363
Nrg1_wildtype	DN105	15	44.018	0	0
Nrg1_wildtype	DN105	16	57.8	0	0
Nrg1_wildtype	DN105	17	47.802	5	0.104598
Nrg1_wildtype	DN105	18	40.917	8	0.195518
Nrg1_wildtype	DN105	19	49.01	1	0.020404
Nrg1_wildtype	DN105	20	59.833	7	0.116992
Nrg1_wildtype	DN105	21	49.803	8	0.160633
Nrg1_wildtype	DN105	22	60.184	3	0.0498471
Nrg1_wildtype	DN105	23	48.121	13	0.270152
Nrg1_wildtype	DN105	24	53.877	7	0.129926
Nrg1_wildtype	DN111	1	57.217	2	0.0349546
Nrg1_wildtype	DN111	2	57.724	2	0.0346476
Nrg1_wildtype	DN111	3	54.405	0	0
Nrg1_wildtype	DN111	4	50.47	2	0.0396275
Nrg1_wildtype	DN111	5	55.746	5	0.0896925
Nrg1_wildtype	DN111	6	49.611	2	0.0403136
Nrg1_wildtype	DN111	7	48.431	7	0.144536
Nrg1_wildtype	DN111	8	56.597	9	0.159019
Nrg1_wildtype	DN111	9	52.885	2	0.0378179
Nrg1_wildtype	DN111	10	42.689	4	0.093701
Nrg1_wildtype	DN111	11	38.094	2	0.0525017
Nrg1_wildtype	DN111	12	52.535	1	0.0190349
Nrg1_wildtype	DN111	13	63.811	7	0.109699
Nrg1_wildtype	DN111	14	52.22	1	0.0191498
Nrg1_wildtype	DN111	15	42.64	3	0.0703565
Nrg1_wildtype	DN111	16	57.191	2	0.0349705
Nrg1_wildtype	DN116	1	49.589	2	0.0403315
Nrg1_wildtype	DN116	2	57.502	1	0.0173907
Nrg1_wildtype	DN116	3	47.508	4	0.0841963
Nrg1_wildtype	DN116	4	49.448	0	0
Nrg1_wildtype	DN116	5	51.264	10	0.195069
Nrg1_wildtype	DN116	6	47.425	2	0.0421718
Nrg1_wildtype	DN116	7	61.875	7	0.113131
Nrg1_wildtype	DN116	8	46.284	4	0.086423
Nrg1_wildtype	DN116	9	49.958	0	0
Nrg1_wildtype	DN116	10	43.467	3	0.0690179
Nrg1_wildtype	DN116	11	51.619	9	0.174354
Nrg1_wildtype	DN116	12	65.779	4	0.0608097
Nrg1_wildtype	DN116	13	47.95	2	0.0417101
Nrg1_wildtype	DN116	14	53.273	3	0.0563137
Nrg1_wildtype	DN116	15	52.721	2	0.0379355
Nrg1_wildtype	DN116	16	66.113	6	0.0907537
Nrg1_wildtype	DN118	1	63.02	-1	-0.015868
Nrg1_wildtype	DN118	2	50.314	4	0.0795007
Nrg1_wildtype	DN118	3	47.395	1	0.0210993
Nrg1_wildtype	DN118	4	62.996	2	0.031748
Nrg1_wildtype	DN118	5	52.31	7	0.133818
Nrg1_wildtype	DN118	6	52.92	5	0.0944822
Nrg1_wildtype	DN118	7	56.214	5	0.0889458
Nrg1_wildtype	DN118	8	47.24	2	0.042337
Nrg1_wildtype	DN118	9	46.399	4	0.0862088
Nrg1_wildtype	DN118	10	40.971	0	0
Nrg1_wildtype	DN118	11	38.34	1	0.0260824
Nrg1_wildtype	DN118	12	45.969	3	0.0652614
Nrg1_wildtype	DN118	13	37.338	-2	-0.0535647
Nrg1_wildtype	DN118	14	50.733	1	0.019711
Nrg1_wildtype	DN118	15	56.234	-1	-0.0177828
Nrg1_wildtype	DN118	16	63.911	2	0.0312935
Nrg1_wildtype	DN118	17	48.566	-1	-0.0205905
Nrg1_wildtype	DN118	18	64.69	4	0.0618334
Nrg1_wildtype	DN118	19	47.863	1	0.020893
Nrg1_wildtype	DN118	20	52.584	1	0.0190172
Nrg1_wildtype	DN118	21	43.498	1	0.0229896
Nrg1_wildtype	DN118	22	51.369	2	0.038934
Nrg1_mutant	DN106	1	48.332	2	0.0413805
Nrg1_mutant	DN106	2	45.684	5	0.109448
Nrg1_mutant	DN106	3	50.877	1	0.0196552
Nrg1_mutant	DN106	4	37.67	-1	-0.0265463
Nrg1_mutant	DN106	5	62.83	7	0.111412
Nrg1_mutant	DN106	6	54.672	0	0
Nrg1_mutant	DN106	7	52.586	4	0.0760659
Nrg1_mutant	DN106	8	52.892	5	0.0945323
Nrg1_mutant	DN106	9	58.689	0	0
Nrg1_mutant	DN106	10	38.293	2	0.0522289
Nrg1_mutant	DN106	11	54.868	3	0.0546767
Nrg1_mutant	DN106	12	53.338	7	0.131239
Nrg1_mutant	DN106	13	53.776	3	0.055787
Nrg1_mutant	DN106	14	52.32	5	0.0955657
Nrg1_mutant	DN106	15	45.946	3	0.065294
Nrg1_mutant	DN106	16	53.775	1	0.018596
Nrg1_mutant	DN107	1	54.432	5	0.0918577
Nrg1_mutant	DN107	2	37.779	1	0.0264697
Nrg1_mutant	DN107	3	42.155	1	0.023722
Nrg1_mutant	DN107	4	51.877	2	0.0385527
Nrg1_mutant	DN107	5	46.227	1	0.0216324
Nrg1_mutant	DN107	6	47.207	2	0.0423666
Nrg1_mutant	DN107	7	42.914	0	0
Nrg1_mutant	DN107	8	45.81	1	0.0218293
Nrg1_mutant	DN107	9	37.476	2	0.0533675
Nrg1_mutant	DN107	10	43.911	3	0.06832
Nrg1_mutant	DN107	11	47.849	1	0.0208991
Nrg1_mutant	DN107	12	41.706	0	0
Nrg1_mutant	DN107	13	60.305	3	0.0497471
Nrg1_mutant	DN107	14	64.558	6	0.0929397
Nrg1_mutant	DN107	15	48.914	4	0.0817762
Nrg1_mutant	DN107	16	55.718	3	0.0538426
Nrg1_mutant	DN107	17	53.07	5	0.0942152
Nrg1_mutant	DN107	18	55.397	3	0.0541546
Nrg1_mutant	DN107	19	55.227	3	0.0543213
Nrg1_mutant	DN107	20	54.31	10	0.184128
Nrg1_mutant	DN107	21	40.306	1	0.0248102
Nrg1_mutant	DN107	22	37.197	2	0.0537678
Nrg1_mutant	DN107	23	44.815	4	0.0892558
Nrg1_mutant	DN112	1	39.17	2	0.0510595
Nrg1_mutant	DN112	2	54.033	5	0.092536
Nrg1_mutant	DN112	3	46.924	2	0.0426221
Nrg1_mutant	DN112	4	51.801	7	0.135133
Nrg1_mutant	DN112	5	53.264	4	0.0750976
Nrg1_mutant	DN112	6	56.424	6	0.106338
Nrg1_mutant	DN112	7	52.499	3	0.0571439
Nrg1_mutant	DN112	8	46.858	5	0.106705
Nrg1_mutant	DN112	9	48.216	2	0.04148
Nrg1_mutant	DN112	10	44.447	7	0.157491
Nrg1_mutant	DN112	11	63.021	5	0.0793386
Nrg1_mutant	DN112	12	51.462	2	0.0388636
Nrg1_mutant	DN112	13	62.887	3	0.0477046
Nrg1_mutant	DN112	14	49.469	0	0
Nrg1_mutant	DN112	15	42.849	0	0
Nrg1_mutant	DN112	16	56.224	2	0.035572
Nrg1_mutant	DN112	17	47.093	1	0.0212346
Nrg1_mutant	DN112	18	46.159	3	0.0649927
Nrg1_mutant	DN112	19	41.249	3	0.072729
Nrg1_mutant	DN112	20	40.807	1	0.0245056
Nrg1_mutant	DN114	1	39.343	0	0
Nrg1_mutant	DN114	2	38.753	2	0.0516089
Nrg1_mutant	DN114	3	52.132	1	0.0191821
Nrg1_mutant	DN114	4	55.821	6	0.107486
Nrg1_mutant	DN114	5	47.756	5	0.104699
Nrg1_mutant	DN114	6	47.082	2	0.0424791
Nrg1_mutant	DN114	7	48.74	5	0.102585
Nrg1_mutant	DN114	8	48.725	4	0.0820934
Nrg1_mutant	DN114	9	45.205	4	0.0884858
Nrg1_mutant	DN114	10	46.675	2	0.0428495
Nrg1_mutant	DN114	11	59.497	1	0.0168076
Nrg1_mutant	DN114	12	38.031	4	0.105177
Nrg1_mutant	DN114	13	46.32	4	0.0863558
Nrg1_mutant	DN114	14	63.705	1	0.0156974
Nrg1_mutant	DN114	15	53.307	2	0.0375185
Nrg1_mutant	DN114	16	50.638	2	0.039496
Nrg1_mutant	DN114	17	48.077	2	0.0415999
Nrg1_mutant	DN114	18	62.025	2	0.0322451
Nrg1_mutant	DN114	19	42.062	0	0
Nrg1_mutant	DN114	20	53.022	0	0
Nrg1_mutant	DN114	21	53.063	0	0
Nrg1_mutant	DN114	22	49.983	1	0.0200068
Nrg1_mutant	DN114	23	51.661	1	0.019357
Nrg1_mutant	DN114	24	41.365	2	0.0483501
Nrg1_mutant	DN114	25	62.407	0	0
Nrg1_mutant	DN114	26	50.944	1	0.0196294
Nrg1_mutant	DN114	27	52.384	0	0
Nrg1_mutant	DN117	1	47.128	1	0.0212188
Nrg1_mutant	DN117	2	44.604	4	0.0896781
Nrg1_mutant	DN117	3	51.746	2	0.0386503
Nrg1_mutant	DN117	4	53.326	3	0.0562577
Nrg1_mutant	DN117	5	51.807	5	0.0965121
Nrg1_mutant	DN117	6	46.994	2	0.0425586
Nrg1_mutant	DN117	7	42.083	-1	-0.0237626
Nrg1_mutant	DN117	8	49.864	2	0.0401091
Nrg1_mutant	DN117	9	41.263	3	0.0727044
Nrg1_mutant	DN117	10	42.914	6	0.139815
Nrg1_mutant	DN117	11	62.856	7	0.111366
Nrg1_mutant	DN117	12	38.938	-1	-0.0256819
Nrg1_mutant	DN117	13	53.479	1	0.0186989
Nrg1_mutant	DN117	14	47.405	3	0.0632845
Nrg1_mutant	DN117	15	47.447	5	0.105381
Nrg1_mutant	DN117	16	50.828	0	0
Nrg1_mutant	DN117	17	49.572	2	0.0403454
Nrg1_mutant	DN117	18	44.645	4	0.0895957
Nrg1_mutant	DN117	19	52.173	4	0.076668
Nrg1_mutant	DN117	20	57.444	-1	-0.0174083
Nrg1_mutant	DN117	21	48.139	1	0.0207732
Nrg1_mutant	DN117	22	50.252	0	0
Nrg1_mutant	DN117	23	44.808	2	0.0446349
Nrg1_mutant	DN117	24	45.081	2	0.0443646
Nrg3_wildtype	DN93	1	46.342	4	0.0863148
Nrg3_wildtype	DN93	2	50.234	3	0.0597205
Nrg3_wildtype	DN93	3	59.714	1	0.0167465
Nrg3_wildtype	DN93	4	42.895	2	0.0466255
Nrg3_wildtype	DN93	5	52.71	2	0.0379435
Nrg3_wildtype	DN93	6	47.052	0	0
Nrg3_wildtype	DN93	7	44.989	2	0.0444553
Nrg3_wildtype	DN93	8	48.153	1	0.0207671
Nrg3_wildtype	DN93	9	45.452	2	0.0440025
Nrg3_wildtype	DN93	10	56.674	2	0.0352896
Nrg3_wildtype	DN93	11	43.388	2	0.0460957
Nrg3_wildtype	DN93	12	58.594	0	0
Nrg3_wildtype	DN93	13	54.853	3	0.0546916
Nrg3_wildtype	DN93	14	52.901	1	0.0189032
Nrg3_wildtype	DN93	15	58.767	9	0.153147
Nrg3_wildtype	DN93	16	42.243	5	0.118363
Nrg3_wildtype	DN93	17	56.613	3	0.0529914
Nrg3_wildtype	DN94	1	51.248	4	0.0780518
Nrg3_wildtype	DN94	2	46.203	1	0.0216436
Nrg3_wildtype	DN94	3	48.275	1	0.0207147
Nrg3_wildtype	DN94	4	52.169	0	0
Nrg3_wildtype	DN94	5	50.14	-1	-0.0199442
Nrg3_wildtype	DN94	6	71.629	0	0
Nrg3_wildtype	DN94	7	57.979	7	0.120733
Nrg3_wildtype	DN94	8	51.36	2	0.0389408
Nrg3_wildtype	DN94	9	66.493	3	0.0451175
Nrg3_wildtype	DN94	10	42.676	4	0.0937295
Nrg3_wildtype	DN94	11	48.94	0	0
Nrg3_wildtype	DN94	12	56.749	5	0.0881073
Nrg3_wildtype	DN94	13	44.445	2	0.0449994
Nrg3_wildtype	DN94	14	46.669	0	0
Nrg3_wildtype	DN94	15	39.913	4	0.100218
Nrg3_wildtype	DN94	16	57.731	3	0.0519651
Nrg3_wildtype	DN94	17	54.512	5	0.0917229
Nrg3_wildtype	DN94	18	43.881	3	0.0683667
Nrg3_wildtype	DN94	19	44.432	1	0.0225063
Nrg3_wildtype	DN94	20	55.526	1	0.0180096
Nrg3_wildtype	DN94	21	45.054	3	0.0665868
Nrg3_wildtype	DN94	22	65.723	1	0.0152154
Nrg3_wildtype	DN94	23	54.197	-1	-0.0184512
Nrg3_wildtype	DN94	24	51.756	3	0.0579643
Nrg3_wildtype	DN95	1	57.299	2	0.0349046
Nrg3_wildtype	DN95	2	50.866	2	0.039319
Nrg3_wildtype	DN95	3	59.709	1	0.0167479
Nrg3_wildtype	DN95	4	40.419	0	0
Nrg3_wildtype	DN95	5	62.717	2	0.0318893
Nrg3_wildtype	DN95	6	51.536	5	0.0970196
Nrg3_wildtype	DN95	7	54.99	1	0.0181851
Nrg3_wildtype	DN95	8	61.061	5	0.0818853
Nrg3_wildtype	DN95	9	55.399	2	0.0361017
Nrg3_wildtype	DN95	10	46.455	5	0.107631
Nrg3_wildtype	DN95	11	58.08	1	0.0172176
Nrg3_wildtype	DN95	12	48.059	1	0.0208078
Nrg3_wildtype	DN95	13	51.425	-1	-0.0194458
Nrg3_wildtype	DN95	14	56.55	5	0.0884173
Nrg3_wildtype	DN95	15	54.187	6	0.110728
Nrg3_wildtype	DN95	16	51.138	5	0.0977746
Nrg3_wildtype	DN95	17	48.98	0	0
Nrg3_wildtype	DN95	18	45.571	2	0.0438876
Nrg3_wildtype	DN95	19	47.944	2	0.0417153
Nrg3_wildtype	DN95	20	47.223	0	0
Nrg3_wildtype	DN95	21	41.388	3	0.0724848
Nrg3_wildtype	DN92	1	49.799	2	0.0401614
Nrg3_wildtype	DN92	2	43.393	5	0.115226
Nrg3_wildtype	DN92	3	45.247	4	0.0884037
Nrg3_wildtype	DN92	4	55.993	4	0.0714375
Nrg3_wildtype	DN92	5	48.286	4	0.0828397
Nrg3_wildtype	DN92	6	55.464	6	0.108178
Nrg3_wildtype	DN92	7	56.118	0	0
Nrg3_wildtype	DN92	8	40.744	0	0
Nrg3_wildtype	DN92	9	60.153	4	0.0664971
Nrg3_wildtype	DN92	10	61.329	6	0.097833
Nrg3_wildtype	DN92	11	65.825	7	0.106343
Nrg3_wildtype	DN92	12	56.923	5	0.087838
Nrg3_wildtype	DN92	13	62.976	4	0.0635163
Nrg3_wildtype	DN92	14	51.888	2	0.0385446
Nrg3_wildtype	DN92	15	47.626	2	0.0419939
Nrg3_wildtype	DN92	16	57.548	6	0.104261
Nrg3_wildtype	DN92	17	59.447	4	0.0672868
Nrg3_wildtype	DN92	18	42.545	1	0.0235045
Nrg3_wildtype	DN92	19	42.196	7	0.165893
Nrg3_wildtype	DN92	20	40.955	1	0.024417
Nrg3_wildtype	DN99	1	57.631	9	0.156166
Nrg3_wildtype	DN99	2	48.808	3	0.0614653
Nrg3_wildtype	DN99	3	48.957	3	0.0612783
Nrg3_wildtype	DN99	4	51.017	4	0.0784052
Nrg3_wildtype	DN99	5	50.598	4	0.0790545
Nrg3_wildtype	DN99	6	59.469	2	0.033631
Nrg3_wildtype	DN99	7	56.24	10	0.177809
Nrg3_wildtype	DN99	8	58.12	9	0.154852
Nrg3_wildtype	DN99	9	56.54	6	0.10612
Nrg3_wildtype	DN99	10	41.437	7	0.168931
Nrg3_wildtype	DN99	11	38.358	-1	-0.0260702
Nrg3_wildtype	DN99	12	57.563	3	0.0521168
Nrg3_wildtype	DN99	13	49.969	3	0.0600372
Nrg3_wildtype	DN99	14	43.486	3	0.0689877
Nrg3_wildtype	DN99	15	41.823	6	0.143462
Nrg3_wildtype	DN99	16	60.935	3	0.0492328
Nrg3_wildtype	DN99	17	37.081	3	0.080904
Nrg3_wildtype	DN100	1	55.036	0	0
Nrg3_wildtype	DN100	2	51.39	3	0.0583771
Nrg3_wildtype	DN100	3	50.72	5	0.0985804
Nrg3_wildtype	DN100	4	56.075	2	0.0356665
Nrg3_wildtype	DN100	5	60.195	6	0.0996761
Nrg3_wildtype	DN100	6	37.477	4	0.106732
Nrg3_wildtype	DN100	7	49.07	2	0.0407581
Nrg3_wildtype	DN100	8	48.476	5	0.103144
Nrg3_wildtype	DN100	9	52.874	3	0.0567387
Nrg3_wildtype	DN100	10	42.438	3	0.0706914
Nrg3_wildtype	DN100	11	49.707	4	0.0804716
Nrg3_wildtype	DN100	12	49.428	2	0.0404629
Nrg3_wildtype	DN100	13	51.103	1	0.0195683
Nrg3_wildtype	DN100	14	50.573	3	0.0593202
Nrg3_wildtype	DN100	15	56.958	3	0.0526704
Nrg3_wildtype	DN100	16	54.559	2	0.0366576
Nrg3_wildtype	DN100	17	43.816	8	0.182582
Nrg3_wildtype	DN100	18	56.457	1	0.0177126
Nrg3_wildtype	DN100	19	53.184	4	0.0752106
Nrg3_wildtype	DN100	20	45.881	4	0.0871821
Nrg3_wildtype	DN100	21	55.021	6	0.109049
Nrg3_wildtype	DN100	22	48.904	1	0.0204482
Nrg3_wildtype	DN100	23	44.521	0	0
Nrg3_wildtype	DN100	24	47.376	0	0
Nrg3_wildtype	DN100	25	47.011	1	0.0212716
Nrg3_wildtype	DN100	26	44.263	2	0.0451845
Nrg3_wildtype	DN100	27	55.328	2	0.0361481
Nrg3_mutant	DN89	1	51.325	0	0
Nrg3_mutant	DN89	2	42.965	1	0.0232748
Nrg3_mutant	DN89	3	55.009	6	0.109073
Nrg3_mutant	DN89	4	58.488	12	0.20517
Nrg3_mutant	DN89	5	56.38	2	0.0354736
Nrg3_mutant	DN89	6	47.75	2	0.0418848
Nrg3_mutant	DN89	7	48.581	3	0.0617525
Nrg3_mutant	DN89	8	42.399	1	0.0235855
Nrg3_mutant	DN89	9	61.506	4	0.0650343
Nrg3_mutant	DN89	10	40.831	2	0.0489824
Nrg3_mutant	DN89	11	39.603	1	0.0252506
Nrg3_mutant	DN89	12	39.29	2	0.0509035
Nrg3_mutant	DN89	13	43.251	2	0.0462417
Nrg3_mutant	DN89	14	37.361	0	0
Nrg3_mutant	DN89	15	44.964	1	0.02224
Nrg3_mutant	DN89	16	40.935	3	0.0732869
Nrg3_mutant	DN89	17	49.721	1	0.0201122
Nrg3_mutant	DN89	18	44.064	2	0.0453885
Nrg3_mutant	DN89	19	43.846	1	0.0228071
Nrg3_mutant	DN89	20	41.517	2	0.048173
Nrg3_mutant	DN90	1	42.86	2	0.0466636
Nrg3_mutant	DN90	2	46.203	1	0.0216436
Nrg3_mutant	DN90	3	48.529	8	0.16485
Nrg3_mutant	DN90	4	51.286	1	0.0194985
Nrg3_mutant	DN90	5	55.912	9	0.160967
Nrg3_mutant	DN90	6	43.429	2	0.0460522
Nrg3_mutant	DN90	7	42.603	2	0.0469451
Nrg3_mutant	DN90	8	42.548	3	0.0705086
Nrg3_mutant	DN90	9	40.404	1	0.02475
Nrg3_mutant	DN90	10	51.878	0	0
Nrg3_mutant	DN90	11	54.829	2	0.036477
Nrg3_mutant	DN90	12	64.162	5	0.0779277
Nrg3_mutant	DN90	13	64.822	3	0.0462806
Nrg3_mutant	DN90	14	56.783	4	0.0704436
Nrg3_mutant	DN90	15	52.392	0	0
Nrg3_mutant	DN90	16	47.258	2	0.0423209
Nrg3_mutant	DN90	17	69.786	6	0.0859771
Nrg3_mutant	DN90	18	54.141	1	0.0184703
Nrg3_mutant	DN90	19	47.915	2	0.0417406
Nrg3_mutant	DN90	20	63.788	1	0.0156769
Nrg3_mutant	DN90	21	61.431	7	0.113949
Nrg3_mutant	DN90	22	47.851	2	0.0417964
Nrg3_mutant	DN90	23	49.188	1	0.0203302
Nrg3_mutant	DN90	24	36.047	4	0.110966
Nrg3_mutant	DN90	25	60.664	2	0.0329685
Nrg3_mutant	DN90	26	44.232	4	0.0904323
Nrg3_mutant	DN96	1	49.779	5	0.100444
Nrg3_mutant	DN96	2	55.038	5	0.0908463
Nrg3_mutant	DN96	3	67.715	2	0.0295356
Nrg3_mutant	DN96	4	49.281	5	0.101459
Nrg3_mutant	DN96	5	53.405	2	0.0374497
Nrg3_mutant	DN96	6	53.662	5	0.0931758
Nrg3_mutant	DN96	7	55.828	8	0.143297
Nrg3_mutant	DN96	8	55.358	4	0.0722569
Nrg3_mutant	DN96	9	57.307	3	0.0523496
Nrg3_mutant	DN96	10	45.894	0	0
Nrg3_mutant	DN96	11	46.606	1	0.0214565
Nrg3_mutant	DN96	12	52	0	0
Nrg3_mutant	DN96	13	57.71	1	0.017328
Nrg3_mutant	DN96	14	55.028	3	0.0545177
Nrg3_mutant	DN96	15	50.805	3	0.0590493
Nrg3_mutant	DN96	16	49.086	0	0
Nrg3_mutant	DN91	1	41.613	1	0.024031
Nrg3_mutant	DN91	2	47.286	1	0.0211479
Nrg3_mutant	DN91	3	44.478	5	0.112415
Nrg3_mutant	DN91	4	60.46	3	0.0496196
Nrg3_mutant	DN91	5	49.04	1	0.0203915
Nrg3_mutant	DN91	6	53.028	5	0.0942898
Nrg3_mutant	DN91	7	49.807	3	0.0602325
Nrg3_mutant	DN91	8	44.985	6	0.133378
Nrg3_mutant	DN91	9	39.247	1	0.0254797
Nrg3_mutant	DN91	10	40.063	3	0.0748821
Nrg3_mutant	DN91	11	52.063	4	0.07683
Nrg3_mutant	DN91	12	46.514	8	0.171991
Nrg3_mutant	DN91	13	49.275	2	0.0405885
Nrg3_mutant	DN91	14	47.589	1	0.0210133
Nrg3_mutant	DN91	15	51.64	5	0.0968242
Nrg3_mutant	DN91	16	73.624	3	0.0407476
Nrg3_mutant	DN91	17	44.83	2	0.044613
Nrg3_mutant	DN91	18	52.378	2	0.038184
Nrg3_mutant	DN91	19	49.34	1	0.0202675
Nrg3_mutant	DN91	20	55.197	7	0.126818
Nrg3_mutant	DN91	21	64.835	5	0.0771188
Nrg3_mutant	DN91	22	54.676	4	0.0731582
Nrg3_mutant	DN98	1	40.984	1	0.0243998
Nrg3_mutant	DN98	2	46.686	2	0.0428394
Nrg3_mutant	DN98	3	47.886	2	0.0417659
Nrg3_mutant	DN98	4	61.075	4	0.0654932
Nrg3_mutant	DN98	5	51.778	2	0.0386264
Nrg3_mutant	DN98	6	50.423	4	0.0793289
Nrg3_mutant	DN98	7	51.509	4	0.0776563
Nrg3_mutant	DN98	8	46.44	2	0.0430663
Nrg3_mutant	DN98	9	42.026	4	0.0951792
Nrg3_mutant	DN98	10	45.264	1	0.0220926
Nrg3_mutant	DN98	11	62.364	7	0.112244
Nrg3_mutant	DN98	12	47.319	4	0.0845326
Nrg3_mutant	DN98	13	42.399	3	0.0707564
Nrg3_mutant	DN98	14	39.916	1	0.0250526
Nrg3_mutant	DN98	15	40.028	1	0.0249825
Nrg3_mutant	DN98	16	43.069	3	0.0696557
Nrg3_mutant	DN98	17	45.009	5	0.111089
Nrg3_mutant	DN97	1	53.182	5	0.0940168
Nrg3_mutant	DN97	2	53.799	3	0.0557631
Nrg3_mutant	DN97	3	57.595	2	0.0347252
Nrg3_mutant	DN97	4	53.053	4	0.0753963
Nrg3_mutant	DN97	5	58.233	8	0.137379
Nrg3_mutant	DN97	6	58.29	3	0.0514668
Nrg3_mutant	DN97	7	58.473	1	0.0171019
Nrg3_mutant	DN97	8	47.904	12	0.250501
Nrg3_mutant	DN97	9	57.282	2	0.034915
Nrg3_mutant	DN97	10	44.082	7	0.158795
Nrg3_mutant	DN97	11	65.468	2	0.0305493
Nrg3_mutant	DN97	12	35.421	2	0.0564637
Nrg3_mutant	DN97	13	52.936	3	0.0566722
Nrg3_mutant	DN97	14	51.758	4	0.0772827
Nrg3_mutant	DN97	15	50.373	0	0
Nrg3_mutant	DN97	16	51.574	2	0.0387792
Nrg3_mutant	DN97	17	57.645	0	0
Nrg3_mutant	DN97	18	54.98	5	0.0909422
Nrg3_mutant	DN97	19	50.836	2	0.0393422
Nrg3_mutant	DN97	20	53.195	1	0.0187988
Nrg3_mutant	DN97	21	41.465	2	0.0482334
Nrg3_mutant	DN97	22	42.347	1	0.0236144
