# Supplementary material for: Subcellular sorting of neuregulins controls the assembly of excitatory-inhibitory cortical circuits
Source: eLife. 2020 Dec 15;9:e57000. doi: 10.7554/eLife.57000 (PMC7755390; doi:10.7554/eLife.57000)
Supplement: Figure 1—source data 1. [file elife-57000-fig1-data1.xlsx]

## Sheet: Inhibitory_synapses
Genotype	Brain	Cell	Count_gad65_cb1r	Perimeter_cell	Density_gad65_cb1r
Nrg1_wildtype	DN104	1	7	38.945	0.179741
Nrg1_wildtype	DN104	2	3	42.28	0.0709555
Nrg1_wildtype	DN104	3	7	37.252	0.187909
Nrg1_wildtype	DN104	4	5	39.333	0.12712
Nrg1_wildtype	DN104	5	3	41.245	0.0727361
Nrg1_wildtype	DN104	6	3	37.36	0.0802998
Nrg1_wildtype	DN104	7	6	42.483	0.141233
Nrg1_wildtype	DN104	8	4	38.309	0.104414
Nrg1_wildtype	DN104	9	6	48.215	0.124443
Nrg1_wildtype	DN104	10	6	50.604	0.118568
Nrg1_wildtype	DN104	11	4	38.179	0.10477
Nrg1_wildtype	DN104	12	3	41.214	0.0727908
Nrg1_wildtype	DN105	1	5	44.012	0.113605
Nrg1_wildtype	DN105	2	5	33.809	0.14789
Nrg1_wildtype	DN105	3	5	46.681	0.10711
Nrg1_wildtype	DN105	4	2	39.254	0.0509502
Nrg1_wildtype	DN105	5	3	41.785	0.0717961
Nrg1_wildtype	DN105	6	8	47.151	0.169668
Nrg1_wildtype	DN105	7	4	48.445	0.0825679
Nrg1_wildtype	DN105	8	10	50.483	0.198086
Nrg1_wildtype	DN105	9	4	51.631	0.0774728
Nrg1_wildtype	DN105	10	7	49.083	0.142616
Nrg1_wildtype	DN105	11	8	44.892	0.178205
Nrg1_wildtype	DN105	12	7	48.107	0.145509
Nrg1_wildtype	DN105	13	5	37.174	0.134503
Nrg1_wildtype	DN105	14	2	36.809	0.0543345
Nrg1_wildtype	DN113	1	5	33.733	0.148223
Nrg1_wildtype	DN113	2	5	39.539	0.126457
Nrg1_wildtype	DN113	3	9	37.285	0.241384
Nrg1_wildtype	DN113	4	6	38.967	0.153976
Nrg1_wildtype	DN113	5	12	36.456	0.329164
Nrg1_wildtype	DN113	6	3	42.104	0.0712521
Nrg1_wildtype	DN113	7	2	35.993	0.0555664
Nrg1_wildtype	DN113	8	6	43.129	0.139118
Nrg1_wildtype	DN113	9	3	55.355	0.0541956
Nrg1_wildtype	DN113	10	4	42.283	0.0946007
Nrg1_wildtype	DN113	11	7	42.537	0.164563
Nrg1_wildtype	DN113	12	5	35.428	0.141131
Nrg1_wildtype	DN113	13	3	39.875	0.0752351
Nrg1_wildtype	DN113	14	5	44.284	0.112908
Nrg1_wildtype	DN113	15	3	35.812	0.0837708
Nrg1_wildtype	DN113	16	8	40.799	0.196083
Nrg1_wildtype	DN113	17	6	44.488	0.134868
Nrg1_wildtype	DN115	1	9	41.575	0.216476
Nrg1_wildtype	DN115	2	4	34.492	0.115969
Nrg1_wildtype	DN115	3	6	36.831	0.162906
Nrg1_wildtype	DN115	4	7	43.033	0.162666
Nrg1_wildtype	DN115	5	8	36.27	0.220568
Nrg1_wildtype	DN115	6	3	28.129	0.106651
Nrg1_wildtype	DN115	7	3	50.748	0.0591156
Nrg1_wildtype	DN115	8	4	45.087	0.0887174
Nrg1_wildtype	DN115	9	6	35	0.171429
Nrg1_wildtype	DN115	10	3	54.446	0.0551005
Nrg1_wildtype	DN115	11	4	43.118	0.0927687
Nrg1_wildtype	DN115	12	6	43.616	0.137564
Nrg1_wildtype	DN115	13	9	47.312	0.190227
Nrg1_wildtype	DN115	14	4	39.384	0.101564
Nrg1_wildtype	DN115	15	4	41.754	0.0957992
Nrg1_wildtype	DN115	16	0	44.45	0
Nrg1_wildtype	DN115	17	3	40.547	0.0739882
Nrg1_wildtype	DN115	18	7	49.079	0.142627
Nrg1_wildtype	DN115	19	5	44.403	0.112605
Nrg1_wildtype	DN111	1	3	36.138	0.0830151
Nrg1_wildtype	DN111	2	4	41.99	0.0952608
Nrg1_wildtype	DN111	3	7	38.271	0.182906
Nrg1_wildtype	DN111	4	7	41.006	0.170707
Nrg1_wildtype	DN111	5	6	43.787	0.137027
Nrg1_wildtype	DN111	6	9	34.325	0.2622
Nrg1_wildtype	DN111	7	12	43.518	0.275748
Nrg1_wildtype	DN111	8	2	36.449	0.0548712
Nrg1_wildtype	DN111	9	4	44.029	0.0908492
Nrg1_wildtype	DN111	10	9	54.345	0.165609
Nrg1_wildtype	DN111	11	7	48.045	0.145697
Nrg1_mutant	DN106	1	3	39.013	0.0768974
Nrg1_mutant	DN106	2	3	38.361	0.0782044
Nrg1_mutant	DN106	3	1	34.759	0.0287695
Nrg1_mutant	DN106	4	3	42.264	0.0709824
Nrg1_mutant	DN106	5	1	40.631	0.0246118
Nrg1_mutant	DN106	6	7	43.56	0.160698
Nrg1_mutant	DN106	7	4	46.178	0.0866213
Nrg1_mutant	DN106	8	4	30.054	0.133094
Nrg1_mutant	DN106	9	2	37.224	0.0537288
Nrg1_mutant	DN106	10	3	36.579	0.0820143
Nrg1_mutant	DN106	11	7	36.85	0.189959
Nrg1_mutant	DN106	12	2	44.246	0.0452018
Nrg1_mutant	DN106	13	1	40.567	0.0246506
Nrg1_mutant	DN106	14	5	40.293	0.124091
Nrg1_mutant	DN106	15	6	42.709	0.140486
Nrg1_mutant	DN106	16	4	38.184	0.104756
Nrg1_mutant	DN107	1	1	44.558	0.0224427
Nrg1_mutant	DN107	2	5	39.734	0.125837
Nrg1_mutant	DN107	3	10	40.764	0.245314
Nrg1_mutant	DN107	4	2	42.09	0.0475172
Nrg1_mutant	DN107	5	2	37.768	0.0529549
Nrg1_mutant	DN107	6	1	39.596	0.0252551
Nrg1_mutant	DN107	7	6	42.869	0.139961
Nrg1_mutant	DN107	8	2	43.046	0.0464619
Nrg1_mutant	DN107	9	2	46.854	0.0426858
Nrg1_mutant	DN107	10	2	49.849	0.0401212
Nrg1_mutant	DN107	11	9	34.723	0.259194
Nrg1_mutant	DN107	12	3	33.961	0.0883366
Nrg1_mutant	DN107	13	5	42.495	0.117661
Nrg1_mutant	DN107	14	1	46.093	0.0216953
Nrg1_mutant	DN107	15	2	43.302	0.0461872
Nrg1_mutant	DN107	16	4	45.599	0.0877212
Nrg1_mutant	DN107	17	7	38.777	0.180519
Nrg1_mutant	DN107	18	4	36.985	0.108152
Nrg1_mutant	DN107	19	5	37.306	0.134027
Nrg1_mutant	DN107	20	3	35.27	0.0850581
Nrg1_mutant	DN107	21	4	45.644	0.0876347
Nrg1_mutant	DN107	22	2	38.616	0.051792
Nrg1_mutant	DN107	23	9	41.033	0.219336
Nrg1_mutant	DN114	1	1	41.581	0.0240494
Nrg1_mutant	DN114	2	8	41.695	0.19187
Nrg1_mutant	DN114	3	7	39.452	0.177431
Nrg1_mutant	DN114	4	2	43.847	0.0456132
Nrg1_mutant	DN114	5	5	40.61	0.123122
Nrg1_mutant	DN114	6	3	35.547	0.0843953
Nrg1_mutant	DN114	7	5	38.823	0.12879
Nrg1_mutant	DN114	8	3	40.779	0.0735673
Nrg1_mutant	DN114	9	6	31.345	0.191418
Nrg1_mutant	DN114	10	5	34.064	0.146783
Nrg1_mutant	DN114	11	4	34.207	0.116935
Nrg1_mutant	DN114	12	6	36.363	0.165003
Nrg1_mutant	DN114	13	1	38.002	0.0263144
Nrg1_mutant	DN112	1	7	38.008	0.184172
Nrg1_mutant	DN112	2	3	37.414	0.0801839
Nrg1_mutant	DN112	3	6	40.079	0.149704
Nrg1_mutant	DN112	4	8	36.514	0.219094
Nrg1_mutant	DN112	5	1	36.353	0.027508
Nrg1_mutant	DN112	6	2	37.087	0.0539273
Nrg1_mutant	DN112	7	4	50.655	0.0789656
Nrg1_mutant	DN112	8	6	41.704	0.143871
Nrg1_mutant	DN112	9	7	37.004	0.189169
Nrg1_mutant	DN112	10	2	41.735	0.0479214
Nrg1_mutant	DN112	11	6	42.888	0.139899
Nrg1_mutant	DN112	12	0	39.881	0
Nrg1_mutant	DN117	1	3	33.216	0.0903179
Nrg1_mutant	DN117	2	3	32.183	0.0932169
Nrg1_mutant	DN117	3	5	38.636	0.129413
Nrg1_mutant	DN117	4	2	31.818	0.0628575
Nrg1_mutant	DN117	5	5	34.748	0.143893
Nrg1_mutant	DN117	6	5	39.61	0.126231
Nrg1_mutant	DN117	7	4	38.341	0.104327
Nrg1_mutant	DN117	8	4	37.288	0.107273
Nrg1_mutant	DN117	9	2	27.721	0.0721475
Nrg1_mutant	DN117	10	3	33.143	0.0905169
Nrg1_mutant	DN117	11	2	42.163	0.047435
Nrg1_mutant	DN117	12	3	35.381	0.0847913
Nrg1_mutant	DN117	13	3	37.419	0.0801732
Nrg1_mutant	DN117	14	2	38.295	0.0522261
Nrg1_mutant	DN117	15	1	38.047	0.0262833
Nrg1_mutant	DN117	16	5	43.611	0.11465
Nrg1_mutant	DN117	17	4	34.964	0.114403
Nrg1_mutant	DN117	18	5	44.36	0.112714
Nrg1_mutant	DN117	19	5	36.154	0.138297
Nrg1_mutant	DN117	20	4	38.142	0.104871
Nrg1_mutant	DN117	21	4	39.138	0.102202
Nrg1_mutant	DN117	22	5	34.634	0.144367
Nrg1_mutant	DN117	23	5	45.496	0.1099
Nrg1_mutant	DN117	24	2	38.711	0.0516649
Nrg1_mutant	DN117	25	3	43.522	0.0689307
Nrg1_mutant	DN117	26	4	42.288	0.0945895
Nrg1_mutant	DN117	27	3	43.829	0.0684478
Nrg1_mutant	DN117	28	1	45.344	0.0220536
Nrg1_mutant	DN117	29	2	55.275	0.0361827
Nrg1_mutant	DN117	30	5	52.864	0.0945823
Nrg3_wildtype	DN93	1	11	41.429	0.265514
Nrg3_wildtype	DN93	2	12	46.982	0.255417
Nrg3_wildtype	DN93	3	7	37.575	0.186294
Nrg3_wildtype	DN93	4	4	40.207	0.0994852
Nrg3_wildtype	DN93	5	2	45.839	0.043631
Nrg3_wildtype	DN93	6	9	44.795	0.200915
Nrg3_wildtype	DN93	7	2	41.26	0.0484731
Nrg3_wildtype	DN93	8	11	38.42	0.286309
Nrg3_wildtype	DN93	9	1	37.05	0.0269906
Nrg3_wildtype	DN93	10	9	42.537	0.211581
Nrg3_wildtype	DN93	11	3	39.439	0.0760668
Nrg3_wildtype	DN93	12	4	40.115	0.0997133
Nrg3_wildtype	DN93	13	5	37.168	0.134524
Nrg3_wildtype	DN93	14	7	38.562	0.181526
Nrg3_wildtype	DN93	15	4	63.48	0.063012
Nrg3_wildtype	DN93	16	7	41.708	0.167834
Nrg3_wildtype	DN94	1	6	35.822	0.167495
Nrg3_wildtype	DN94	2	8	36.399	0.219786
Nrg3_wildtype	DN94	3	3	41.183	0.0728456
Nrg3_wildtype	DN94	4	7	41.151	0.170105
Nrg3_wildtype	DN94	5	4	46.412	0.0861846
Nrg3_wildtype	DN94	6	5	44.931	0.111282
Nrg3_wildtype	DN94	7	3	42.699	0.0702593
Nrg3_wildtype	DN94	8	10	42.601	0.234736
Nrg3_wildtype	DN94	9	6	49.782	0.120525
Nrg3_wildtype	DN94	10	5	41.752	0.119755
Nrg3_wildtype	DN94	11	2	46.117	0.043368
Nrg3_wildtype	DN95	1	2	37.119	0.0538808
Nrg3_wildtype	DN95	2	4	35.877	0.111492
Nrg3_wildtype	DN95	3	9	46.077	0.195325
Nrg3_wildtype	DN95	4	2	39.722	0.0503499
Nrg3_wildtype	DN95	5	13	45.261	0.287223
Nrg3_wildtype	DN95	6	6	42.612	0.140805
Nrg3_wildtype	DN95	7	3	42.026	0.0713844
Nrg3_wildtype	DN92	1	5	39.201	0.127548
Nrg3_wildtype	DN92	2	3	39.77	0.0754337
Nrg3_wildtype	DN92	3	4	33.033	0.121091
Nrg3_wildtype	DN92	4	3	34.969	0.0857903
Nrg3_wildtype	DN92	5	7	43.117	0.162349
Nrg3_wildtype	DN92	6	0	39.333	0
Nrg3_wildtype	DN92	7	20	38.877	0.514443
Nrg3_wildtype	DN92	8	7	34.882	0.200677
Nrg3_wildtype	DN92	9	4	48.448	0.0825627
Nrg3_wildtype	DN92	10	5	40.966	0.122052
Nrg3_wildtype	DN92	11	5	41.678	0.119967
Nrg3_wildtype	DN92	12	14	43.797	0.319657
Nrg3_wildtype	DN92	13	4	40.91	0.0977756
Nrg3_wildtype	DN92	14	7	43.062	0.162556
Nrg3_wildtype	DN92	15	2	41.621	0.0480527
Nrg3_wildtype	DN92	16	3	44.603	0.0672601
Nrg3_wildtype	DN92	17	1	44.783	0.0223299
Nrg3_wildtype	DN92	18	7	45.936	0.152386
Nrg3_wildtype	DN92	19	8	44.341	0.18042
Nrg3_wildtype	DN92	20	2	37.106	0.0538996
Nrg3_wildtype	DN92	21	7	38.993	0.179519
Nrg3_wildtype	DN92	22	6	42.027	0.142765
Nrg3_wildtype	DN92	23	3	40.704	0.0737028
Nrg3_wildtype	DN92	24	8	39.11	0.204551
Nrg3_wildtype	DN92	25	2	31.823	0.0628476
Nrg3_wildtype	DN92	26	0	42.314	0
Nrg3_wildtype	DN92	27	1	37.028	0.0270066
Nrg3_wildtype	DN92	28	3	36.864	0.0813802
Nrg3_wildtype	DN92	29	1	36.065	0.0277277
Nrg3_wildtype	DN92	30	6	40.518	0.148082
Nrg3_wildtype	DN100	1	10	35.937	0.278265
Nrg3_wildtype	DN100	2	9	42.159	0.213478
Nrg3_wildtype	DN100	3	13	48.294	0.269185
Nrg3_wildtype	DN100	4	2	41.092	0.0486713
Nrg3_wildtype	DN100	5	7	42.187	0.165928
Nrg3_wildtype	DN100	6	7	45.435	0.154066
Nrg3_wildtype	DN100	7	3	43.342	0.0692169
Nrg3_wildtype	DN100	8	8	44.035	0.181674
Nrg3_wildtype	DN100	9	1	42.711	0.0234132
Nrg3_wildtype	DN100	10	6	45.198	0.132749
Nrg3_wildtype	DN100	11	6	47.671	0.125863
Nrg3_wildtype	DN99	1	6	39.444	0.152114
Nrg3_wildtype	DN99	2	2	46.923	0.042623
Nrg3_wildtype	DN99	3	5	42.562	0.117476
Nrg3_wildtype	DN99	4	2	43.53	0.0459453
Nrg3_wildtype	DN99	5	3	39.889	0.0752087
Nrg3_wildtype	DN99	6	4	29.94	0.133601
Nrg3_wildtype	DN99	7	6	37.537	0.159842
Nrg3_wildtype	DN99	8	3	36.971	0.0811447
Nrg3_wildtype	DN99	9	3	32.951	0.0910443
Nrg3_wildtype	DN99	10	8	37.63	0.212596
Nrg3_wildtype	DN99	11	3	31.383	0.0955932
Nrg3_wildtype	DN99	12	6	35.933	0.166977
Nrg3_wildtype	DN99	13	6	36.023	0.16656
Nrg3_wildtype	DN99	14	6	41.328	0.14518
Nrg3_wildtype	DN99	15	5	46.843	0.10674
Nrg3_wildtype	DN99	16	6	39.543	0.151734
Nrg3_wildtype	DN99	17	8	35.834	0.223252
Nrg3_wildtype	DN99	18	3	36.083	0.0831416
Nrg3_wildtype	DN99	19	5	41.084	0.121702
Nrg3_wildtype	DN99	20	11	46.286	0.237653
Nrg3_wildtype	DN99	21	2	37.389	0.0534917
Nrg3_mutant	DN89	1	4	34.218	0.116898
Nrg3_mutant	DN89	2	5	36.157	0.138286
Nrg3_mutant	DN89	3	3	35.729	0.0839654
Nrg3_mutant	DN89	4	2	45.864	0.0436072
Nrg3_mutant	DN89	5	4	37.68	0.106157
Nrg3_mutant	DN89	6	2	40.533	0.0493425
Nrg3_mutant	DN89	7	9	45.326	0.198562
Nrg3_mutant	DN89	8	3	44.41	0.0675524
Nrg3_mutant	DN89	9	16	41.084	0.389446
Nrg3_mutant	DN89	10	9	53.105	0.169476
Nrg3_mutant	DN89	11	7	40.84	0.171401
Nrg3_mutant	DN89	12	2	45.922	0.0435521
Nrg3_mutant	DN89	13	9	36.481	0.246704
Nrg3_mutant	DN89	14	5	33.375	0.149813
Nrg3_mutant	DN89	15	2	43.632	0.0458379
Nrg3_mutant	DN89	16	5	43.224	0.115676
Nrg3_mutant	DN89	17	5	35.528	0.140734
Nrg3_mutant	DN89	18	7	37.649	0.185928
Nrg3_mutant	DN89	19	1	36.806	0.0271695
Nrg3_mutant	DN89	20	2	39.366	0.0508053
Nrg3_mutant	DN89	21	5	48.78	0.102501
Nrg3_mutant	DN89	22	2	42.117	0.0474868
Nrg3_mutant	DN89	23	3	40.048	0.0749101
Nrg3_mutant	DN90	1	6	38.271	0.156777
Nrg3_mutant	DN90	2	2	40.136	0.0498306
Nrg3_mutant	DN90	3	3	40.634	0.0738298
Nrg3_mutant	DN90	4	8	47.437	0.168645
Nrg3_mutant	DN90	5	9	44.862	0.200615
Nrg3_mutant	DN90	6	10	37.215	0.268709
Nrg3_mutant	DN90	7	1	40.23	0.0248571
Nrg3_mutant	DN90	8	5	36.417	0.137299
Nrg3_mutant	DN96	1	7	42.92	0.163094
Nrg3_mutant	DN96	2	9	38.671	0.232733
Nrg3_mutant	DN96	3	6	44.137	0.13594
Nrg3_mutant	DN96	4	3	46.505	0.0645092
Nrg3_mutant	DN96	5	4	35.964	0.111222
Nrg3_mutant	DN96	6	5	47.745	0.104723
Nrg3_mutant	DN96	7	8	39.365	0.203226
Nrg3_mutant	DN96	8	8	57.024	0.140292
Nrg3_mutant	DN96	9	5	38.195	0.130907
Nrg3_mutant	DN96	10	3	51.577	0.0581655
Nrg3_mutant	DN96	11	1	46.029	0.0217254
Nrg3_mutant	DN96	12	8	38.792	0.206228
Nrg3_mutant	DN96	13	1	40.037	0.0249769
Nrg3_mutant	DN96	14	6	44.858	0.133755
Nrg3_mutant	DN96	15	8	51.418	0.155588
Nrg3_mutant	DN96	16	5	40.671	0.122938
Nrg3_mutant	DN96	17	6	40.714	0.147369
Nrg3_mutant	DN91	1	5	37.94	0.131787
Nrg3_mutant	DN91	2	4	45.156	0.0885818
Nrg3_mutant	DN91	3	5	40.353	0.123907
Nrg3_mutant	DN91	4	0	35.623	0
Nrg3_mutant	DN91	5	7	42.382	0.165164
Nrg3_mutant	DN91	6	8	43.225	0.185078
Nrg3_mutant	DN91	7	7	42.067	0.166401
Nrg3_mutant	DN91	8	7	36.555	0.191492
Nrg3_mutant	DN91	9	7	40.822	0.171476
Nrg3_mutant	DN91	10	5	42.445	0.1178
Nrg3_mutant	DN91	11	8	50.41	0.158699
Nrg3_mutant	DN91	12	4	44.39	0.0901104
Nrg3_mutant	DN91	13	2	46.519	0.0429932
Nrg3_mutant	DN91	14	12	54.487	0.220236
Nrg3_mutant	DN91	15	8	40.101	0.199496
Nrg3_mutant	DN91	16	6	40.971	0.146445
Nrg3_mutant	DN91	17	3	44.045	0.0681122
Nrg3_mutant	DN91	18	3	46.396	0.0646607
Nrg3_mutant	DN91	19	3	42.563	0.0704838
Nrg3_mutant	DN91	20	8	39.496	0.202552
Nrg3_mutant	DN91	21	2	39.348	0.0508285
Nrg3_mutant	DN91	22	1	38.421	0.0260274
Nrg3_mutant	DN91	23	3	29.961	0.10013
Nrg3_mutant	DN91	24	3	39.951	0.075092
Nrg3_mutant	DN91	25	6	48.42	0.123916
Nrg3_mutant	DN97	1	6	42.998	0.139541
Nrg3_mutant	DN97	2	8	42.597	0.187807
Nrg3_mutant	DN97	3	5	35.31	0.141603
Nrg3_mutant	DN97	4	8	41.185	0.194245
Nrg3_mutant	DN97	5	8	35.752	0.223764
Nrg3_mutant	DN97	6	6	46.635	0.128659
Nrg3_mutant	DN97	7	4	32.191	0.124258
Nrg3_mutant	DN97	8	7	36.479	0.191891
Nrg3_mutant	DN97	9	7	38.523	0.18171
Nrg3_mutant	DN97	10	1	37.235	0.0268565
Nrg3_mutant	DN97	11	6	42.939	0.139733
Nrg3_mutant	DN97	12	6	45.322	0.132386
Nrg3_mutant	DN97	13	9	36.94	0.243638
Nrg3_mutant	DN98	1	9	46.236	0.194654
Nrg3_mutant	DN98	2	7	38.739	0.180696
Nrg3_mutant	DN98	3	9	36.419	0.247124
Nrg3_mutant	DN98	4	3	44.186	0.0678948
Nrg3_mutant	DN98	5	0	48.732	0
Nrg3_mutant	DN98	6	8	43.655	0.183255
Nrg3_mutant	DN98	7	7	44.584	0.157007
Nrg3_mutant	DN98	8	3	42.867	0.0699839
Nrg3_mutant	DN98	9	4	45.509	0.0878947
Nrg3_mutant	DN98	10	3	45.879	0.0653894
Nrg3_mutant	DN98	11	12	41.001	0.292676
Nrg3_mutant	DN98	12	5	42.82	0.116768
Nrg3_mutant	DN98	13	6	47.472	0.12639
Nrg3_mutant	DN98	14	7	48.463	0.14444

## Sheet: Excitatory_synapses
Genotype	Brain	Cell	Count_vglut1_tdt_psd95	Perimeter_cell	Density_vglut1_tdt_pds95
Nrg1_wildtype	DN104	1	6	42.976	0.139613
Nrg1_wildtype	DN104	2	8	52.022	0.153781
Nrg1_wildtype	DN104	3	5	50.445	0.0991179
Nrg1_wildtype	DN104	4	9	61.88	0.145443
Nrg1_wildtype	DN104	5	1	38.036	0.0262909
Nrg1_wildtype	DN104	6	2	55.269	0.0361867
Nrg1_wildtype	DN104	7	5	56.074	0.0891679
Nrg1_wildtype	DN104	8	5	42.314	0.118164
Nrg1_wildtype	DN104	9	4	38.669	0.103442
Nrg1_wildtype	DN104	10	11	58.429	0.188263
Nrg1_wildtype	DN104	11	9	48.33	0.18622
Nrg1_wildtype	DN104	12	3	59.114	0.0507494
Nrg1_wildtype	DN104	13	4	52.443	0.0762733
Nrg1_wildtype	DN104	14	5	47.097	0.106164
Nrg1_wildtype	DN104	15	1	47.15	0.0212089
Nrg1_wildtype	DN104	16	1	47.469	0.0210664
Nrg1_wildtype	DN104	17	3	61.592	0.0487076
Nrg1_wildtype	DN104	18	6	56.476	0.10624
Nrg1_wildtype	DN104	19	5	67.64	0.0739208
Nrg1_wildtype	DN104	20	4	56.843	0.0703693
Nrg1_wildtype	DN104	21	9	47.735	0.188541
Nrg1_wildtype	DN104	22	4	51.387	0.0778407
Nrg1_wildtype	DN104	23	4	49.826	0.0802794
Nrg1_wildtype	DN105	1	8	51.266	0.156049
Nrg1_wildtype	DN105	2	4	48.169	0.083041
Nrg1_wildtype	DN105	3	7	45.173	0.15496
Nrg1_wildtype	DN105	4	4	54.001	0.0740727
Nrg1_wildtype	DN105	5	10	49.707	0.201179
Nrg1_wildtype	DN105	6	12	39.961	0.300293
Nrg1_wildtype	DN105	7	6	50.67	0.118413
Nrg1_wildtype	DN105	8	10	52.098	0.191946
Nrg1_wildtype	DN105	9	3	37.051	0.0809695
Nrg1_wildtype	DN105	10	9	39.922	0.22544
Nrg1_wildtype	DN105	11	6	42.146	0.142362
Nrg1_wildtype	DN105	12	1	41.825	0.0239091
Nrg1_wildtype	DN105	13	3	45.022	0.0666341
Nrg1_wildtype	DN105	14	1	37.343	0.0267788
Nrg1_wildtype	DN105	15	5	44.018	0.11359
Nrg1_wildtype	DN105	16	2	57.8	0.0346021
Nrg1_wildtype	DN105	17	10	47.802	0.209196
Nrg1_wildtype	DN105	18	8	40.917	0.195518
Nrg1_wildtype	DN105	19	10	49.01	0.20404
Nrg1_wildtype	DN105	20	9	59.833	0.150419
Nrg1_wildtype	DN105	21	2	49.803	0.0401582
Nrg1_wildtype	DN105	22	4	60.184	0.0664628
Nrg1_wildtype	DN105	23	7	48.121	0.145467
Nrg1_wildtype	DN105	24	7	53.877	0.129926
Nrg1_wildtype	DN111	1	4	57.217	0.0699093
Nrg1_wildtype	DN111	2	9	57.724	0.155914
Nrg1_wildtype	DN111	3	3	54.405	0.055142
Nrg1_wildtype	DN111	4	4	50.47	0.079255
Nrg1_wildtype	DN111	5	3	55.746	0.0538155
Nrg1_wildtype	DN111	6	9	49.611	0.181411
Nrg1_wildtype	DN111	7	3	48.431	0.0619438
Nrg1_wildtype	DN111	8	4	56.597	0.0706751
Nrg1_wildtype	DN111	9	7	52.885	0.132363
Nrg1_wildtype	DN111	10	8	42.689	0.187402
Nrg1_wildtype	DN111	11	7	38.094	0.183756
Nrg1_wildtype	DN111	12	7	52.535	0.133245
Nrg1_wildtype	DN111	13	11	63.811	0.172384
Nrg1_wildtype	DN111	14	9	52.22	0.172348
Nrg1_wildtype	DN111	15	4	42.64	0.0938086
Nrg1_wildtype	DN111	16	12	57.191	0.209823
Nrg1_wildtype	DN116	1	9	49.589	0.181492
Nrg1_wildtype	DN116	2	6	57.502	0.104344
Nrg1_wildtype	DN116	3	9	47.508	0.189442
Nrg1_wildtype	DN116	4	9	49.448	0.182009
Nrg1_wildtype	DN116	5	8	51.264	0.156055
Nrg1_wildtype	DN116	6	9	47.425	0.189773
Nrg1_wildtype	DN116	7	6	61.875	0.0969697
Nrg1_wildtype	DN116	8	4	46.284	0.086423
Nrg1_wildtype	DN116	9	18	49.958	0.360303
Nrg1_wildtype	DN116	10	5	43.467	0.11503
Nrg1_wildtype	DN116	11	7	51.619	0.135609
Nrg1_wildtype	DN116	12	7	65.779	0.106417
Nrg1_wildtype	DN116	13	7	47.95	0.145985
Nrg1_wildtype	DN116	14	4	53.273	0.0750849
Nrg1_wildtype	DN116	15	4	52.721	0.0758711
Nrg1_wildtype	DN116	16	10	66.113	0.151256
Nrg1_wildtype	DN118	1	7	63.02	0.111076
Nrg1_wildtype	DN118	2	3	50.314	0.0596256
Nrg1_wildtype	DN118	3	4	47.395	0.0843971
Nrg1_wildtype	DN118	4	3	62.996	0.0476221
Nrg1_wildtype	DN118	5	8	52.31	0.152934
Nrg1_wildtype	DN118	6	4	52.92	0.0755858
Nrg1_wildtype	DN118	7	5	56.214	0.0889458
Nrg1_wildtype	DN118	8	7	47.24	0.14818
Nrg1_wildtype	DN118	9	9	46.399	0.19397
Nrg1_wildtype	DN118	10	5	40.971	0.122038
Nrg1_wildtype	DN118	11	7	38.34	0.182577
Nrg1_wildtype	DN118	12	4	45.969	0.0870152
Nrg1_wildtype	DN118	13	4	37.338	0.107129
Nrg1_wildtype	DN118	14	8	50.733	0.157688
Nrg1_wildtype	DN118	15	7	56.234	0.12448
Nrg1_wildtype	DN118	16	7	63.911	0.109527
Nrg1_wildtype	DN118	17	8	48.566	0.164724
Nrg1_wildtype	DN118	18	9	64.69	0.139125
Nrg1_wildtype	DN118	19	8	47.863	0.167144
Nrg1_wildtype	DN118	20	3	52.584	0.0570516
Nrg1_wildtype	DN118	21	3	43.498	0.0689687
Nrg1_wildtype	DN118	22	3	51.369	0.058401
Nrg1_mutant	DN106	1	3	48.332	0.0620707
Nrg1_mutant	DN106	2	3	45.684	0.0656685
Nrg1_mutant	DN106	3	2	50.877	0.0393105
Nrg1_mutant	DN106	4	6	37.67	0.159278
Nrg1_mutant	DN106	5	4	62.83	0.0636639
Nrg1_mutant	DN106	6	6	54.672	0.109745
Nrg1_mutant	DN106	7	6	52.586	0.114099
Nrg1_mutant	DN106	8	9	52.892	0.170158
Nrg1_mutant	DN106	9	3	58.689	0.0511169
Nrg1_mutant	DN106	10	1	38.293	0.0261144
Nrg1_mutant	DN106	11	5	54.868	0.0911278
Nrg1_mutant	DN106	12	13	53.338	0.243729
Nrg1_mutant	DN106	13	1	53.776	0.0185957
Nrg1_mutant	DN106	14	5	52.32	0.0955657
Nrg1_mutant	DN106	15	3	45.946	0.065294
Nrg1_mutant	DN106	16	11	53.775	0.204556
Nrg1_mutant	DN107	1	7	54.432	0.128601
Nrg1_mutant	DN107	2	8	37.779	0.211758
Nrg1_mutant	DN107	3	7	42.155	0.166054
Nrg1_mutant	DN107	4	9	51.877	0.173487
Nrg1_mutant	DN107	5	2	46.227	0.0432648
Nrg1_mutant	DN107	6	7	47.207	0.148283
Nrg1_mutant	DN107	7	0	42.914	0
Nrg1_mutant	DN107	8	1	45.81	0.0218293
Nrg1_mutant	DN107	9	5	37.476	0.133419
Nrg1_mutant	DN107	10	3	43.911	0.06832
Nrg1_mutant	DN107	11	8	47.849	0.167193
Nrg1_mutant	DN107	12	6	41.706	0.143864
Nrg1_mutant	DN107	13	3	60.305	0.0497471
Nrg1_mutant	DN107	14	11	64.558	0.170389
Nrg1_mutant	DN107	15	5	48.914	0.10222
Nrg1_mutant	DN107	16	6	55.718	0.107685
Nrg1_mutant	DN107	17	2	53.07	0.0376861
Nrg1_mutant	DN107	18	5	55.397	0.0902576
Nrg1_mutant	DN107	19	4	55.227	0.0724283
Nrg1_mutant	DN107	20	15	54.31	0.276192
Nrg1_mutant	DN107	21	10	40.306	0.248102
Nrg1_mutant	DN107	22	4	37.197	0.107536
Nrg1_mutant	DN107	23	2	44.815	0.0446279
Nrg1_mutant	DN112	1	7	39.17	0.178708
Nrg1_mutant	DN112	2	11	54.033	0.203579
Nrg1_mutant	DN112	3	8	46.924	0.170488
Nrg1_mutant	DN112	4	6	51.801	0.115828
Nrg1_mutant	DN112	5	5	53.264	0.093872
Nrg1_mutant	DN112	6	11	56.424	0.194953
Nrg1_mutant	DN112	7	4	52.499	0.0761919
Nrg1_mutant	DN112	8	9	46.858	0.19207
Nrg1_mutant	DN112	9	4	48.216	0.08296
Nrg1_mutant	DN112	10	12	44.447	0.269984
Nrg1_mutant	DN112	11	7	63.021	0.111074
Nrg1_mutant	DN112	12	5	51.462	0.0971591
Nrg1_mutant	DN112	13	10	62.887	0.159015
Nrg1_mutant	DN112	14	9	49.469	0.181932
Nrg1_mutant	DN112	15	7	42.849	0.163364
Nrg1_mutant	DN112	16	8	56.224	0.142288
Nrg1_mutant	DN112	17	3	47.093	0.0637037
Nrg1_mutant	DN112	18	8	46.159	0.173314
Nrg1_mutant	DN112	19	4	41.249	0.096972
Nrg1_mutant	DN112	20	3	40.807	0.0735168
Nrg1_mutant	DN114	1	6	39.343	0.152505
Nrg1_mutant	DN114	2	3	38.753	0.0774134
Nrg1_mutant	DN114	3	4	52.132	0.0767283
Nrg1_mutant	DN114	4	3	55.821	0.0537432
Nrg1_mutant	DN114	5	5	47.756	0.104699
Nrg1_mutant	DN114	6	5	47.082	0.106198
Nrg1_mutant	DN114	7	6	48.74	0.123102
Nrg1_mutant	DN114	8	4	48.725	0.0820934
Nrg1_mutant	DN114	9	13	45.205	0.287579
Nrg1_mutant	DN114	10	12	46.675	0.257097
Nrg1_mutant	DN114	11	6	59.497	0.100845
Nrg1_mutant	DN114	12	10	38.031	0.262943
Nrg1_mutant	DN114	13	6	46.32	0.129534
Nrg1_mutant	DN114	14	6	63.705	0.0941841
Nrg1_mutant	DN114	15	6	53.307	0.112556
Nrg1_mutant	DN114	16	1	50.638	0.019748
Nrg1_mutant	DN114	17	4	48.077	0.0831999
Nrg1_mutant	DN114	18	4	62.025	0.0644901
Nrg1_mutant	DN114	19	5	42.062	0.118872
Nrg1_mutant	DN114	20	6	53.022	0.113161
Nrg1_mutant	DN114	21	12	53.063	0.226146
Nrg1_mutant	DN114	22	10	49.983	0.200068
Nrg1_mutant	DN114	23	7	51.661	0.135499
Nrg1_mutant	DN114	24	7	41.365	0.169225
Nrg1_mutant	DN114	25	7	62.407	0.112167
Nrg1_mutant	DN114	26	3	50.944	0.0588882
Nrg1_mutant	DN114	27	2	52.384	0.0381796
Nrg1_mutant	DN117	1	7	47.128	0.148532
Nrg1_mutant	DN117	2	3	44.604	0.0672585
Nrg1_mutant	DN117	3	4	51.746	0.0773007
Nrg1_mutant	DN117	4	14	53.326	0.262536
Nrg1_mutant	DN117	5	14	51.807	0.270234
Nrg1_mutant	DN117	6	2	46.994	0.0425586
Nrg1_mutant	DN117	7	5	42.083	0.118813
Nrg1_mutant	DN117	8	11	49.864	0.2206
Nrg1_mutant	DN117	9	2	41.263	0.0484696
Nrg1_mutant	DN117	10	2	42.914	0.0466048
Nrg1_mutant	DN117	11	9	62.856	0.143184
Nrg1_mutant	DN117	12	2	38.938	0.0513637
Nrg1_mutant	DN117	13	4	53.479	0.0747957
Nrg1_mutant	DN117	14	15	47.405	0.316422
Nrg1_mutant	DN117	15	6	47.447	0.126457
Nrg1_mutant	DN117	16	7	50.828	0.137719
Nrg1_mutant	DN117	17	4	49.572	0.0806907
Nrg1_mutant	DN117	18	6	44.645	0.134394
Nrg1_mutant	DN117	19	2	52.173	0.038334
Nrg1_mutant	DN117	20	11	57.444	0.191491
Nrg1_mutant	DN117	21	4	48.139	0.0830927
Nrg1_mutant	DN117	22	6	50.252	0.119398
Nrg1_mutant	DN117	23	9	44.808	0.200857
Nrg1_mutant	DN117	24	5	45.081	0.110911
Nrg3_wildtype	DN93	1	16	46.342	0.345259
Nrg3_wildtype	DN93	2	5	50.234	0.0995342
Nrg3_wildtype	DN93	3	6	59.714	0.100479
Nrg3_wildtype	DN93	4	9	42.895	0.209815
Nrg3_wildtype	DN93	5	5	52.71	0.0948587
Nrg3_wildtype	DN93	6	3	47.052	0.0637592
Nrg3_wildtype	DN93	7	9	44.989	0.200049
Nrg3_wildtype	DN93	8	2	48.153	0.0415343
Nrg3_wildtype	DN93	9	9	45.452	0.198011
Nrg3_wildtype	DN93	10	8	56.674	0.141158
Nrg3_wildtype	DN93	11	6	43.388	0.138287
Nrg3_wildtype	DN93	12	11	58.594	0.187733
Nrg3_wildtype	DN93	13	9	54.853	0.164075
Nrg3_wildtype	DN93	14	7	52.901	0.132323
Nrg3_wildtype	DN93	15	3	58.767	0.0510491
Nrg3_wildtype	DN93	16	13	42.243	0.307743
Nrg3_wildtype	DN93	17	9	56.613	0.158974
Nrg3_wildtype	DN94	1	2	51.248	0.0390259
Nrg3_wildtype	DN94	2	1	46.203	0.0216436
Nrg3_wildtype	DN94	3	3	48.275	0.062144
Nrg3_wildtype	DN94	4	9	52.169	0.172516
Nrg3_wildtype	DN94	5	15	50.14	0.299162
Nrg3_wildtype	DN94	6	9	71.629	0.125647
Nrg3_wildtype	DN94	7	11	57.979	0.189724
Nrg3_wildtype	DN94	8	2	51.36	0.0389408
Nrg3_wildtype	DN94	9	6	66.493	0.0902351
Nrg3_wildtype	DN94	10	1	42.676	0.0234324
Nrg3_wildtype	DN94	11	1	48.94	0.0204332
Nrg3_wildtype	DN94	12	5	56.749	0.0881073
Nrg3_wildtype	DN94	13	1	44.445	0.0224997
Nrg3_wildtype	DN94	14	3	46.669	0.0642825
Nrg3_wildtype	DN94	15	4	39.913	0.100218
Nrg3_wildtype	DN94	16	9	57.731	0.155895
Nrg3_wildtype	DN94	17	17	54.512	0.311858
Nrg3_wildtype	DN94	18	3	43.881	0.0683667
Nrg3_wildtype	DN94	19	6	44.432	0.135038
Nrg3_wildtype	DN94	20	5	55.526	0.0900479
Nrg3_wildtype	DN94	21	6	45.054	0.133174
Nrg3_wildtype	DN94	22	15	65.723	0.228231
Nrg3_wildtype	DN94	23	11	54.197	0.202963
Nrg3_wildtype	DN94	24	4	51.756	0.0772857
Nrg3_wildtype	DN95	1	5	57.299	0.0872616
Nrg3_wildtype	DN95	2	13	50.866	0.255573
Nrg3_wildtype	DN95	3	1	59.709	0.0167479
Nrg3_wildtype	DN95	4	3	40.419	0.0742225
Nrg3_wildtype	DN95	5	7	62.717	0.111612
Nrg3_wildtype	DN95	6	0	51.536	0
Nrg3_wildtype	DN95	7	6	54.99	0.109111
Nrg3_wildtype	DN95	8	3	61.061	0.0491312
Nrg3_wildtype	DN95	9	7	55.399	0.126356
Nrg3_wildtype	DN95	10	3	46.455	0.0645786
Nrg3_wildtype	DN95	11	6	58.08	0.103306
Nrg3_wildtype	DN95	12	9	48.059	0.18727
Nrg3_wildtype	DN95	13	9	51.425	0.175012
Nrg3_wildtype	DN95	14	0	56.55	0
Nrg3_wildtype	DN95	15	5	54.187	0.0922731
Nrg3_wildtype	DN95	16	8	51.138	0.156439
Nrg3_wildtype	DN95	17	4	48.98	0.081666
Nrg3_wildtype	DN95	18	3	45.571	0.0658313
Nrg3_wildtype	DN95	19	7	47.944	0.146004
Nrg3_wildtype	DN95	20	11	47.223	0.232937
Nrg3_wildtype	DN95	21	2	41.388	0.0483232
Nrg3_wildtype	DN92	1	10	49.799	0.200807
Nrg3_wildtype	DN92	2	19	43.393	0.437859
Nrg3_wildtype	DN92	3	9	45.247	0.198908
Nrg3_wildtype	DN92	4	6	55.993	0.107156
Nrg3_wildtype	DN92	5	6	48.286	0.12426
Nrg3_wildtype	DN92	6	7	55.464	0.126208
Nrg3_wildtype	DN92	7	10	56.118	0.178196
Nrg3_wildtype	DN92	8	5	40.744	0.122717
Nrg3_wildtype	DN92	9	1	60.153	0.0166243
Nrg3_wildtype	DN92	10	16	61.329	0.260888
Nrg3_wildtype	DN92	11	7	65.825	0.106343
Nrg3_wildtype	DN92	12	6	56.923	0.105406
Nrg3_wildtype	DN92	13	1	62.976	0.0158791
Nrg3_wildtype	DN92	14	4	51.888	0.0770891
Nrg3_wildtype	DN92	15	2	47.626	0.0419939
Nrg3_wildtype	DN92	16	2	57.548	0.0347536
Nrg3_wildtype	DN92	17	9	59.447	0.151395
Nrg3_wildtype	DN92	18	9	42.545	0.211541
Nrg3_wildtype	DN92	19	5	42.196	0.118495
Nrg3_wildtype	DN92	20	3	40.955	0.0732511
Nrg3_wildtype	DN99	1	8	57.631	0.138814
Nrg3_wildtype	DN99	2	0	48.808	0
Nrg3_wildtype	DN99	3	7	48.957	0.142983
Nrg3_wildtype	DN99	4	3	51.017	0.0588039
Nrg3_wildtype	DN99	5	0	50.598	0
Nrg3_wildtype	DN99	6	8	59.469	0.134524
Nrg3_wildtype	DN99	7	13	56.24	0.231152
Nrg3_wildtype	DN99	8	9	58.12	0.154852
Nrg3_wildtype	DN99	9	4	56.54	0.0707464
Nrg3_wildtype	DN99	10	5	41.437	0.120665
Nrg3_wildtype	DN99	11	5	38.358	0.130351
Nrg3_wildtype	DN99	12	12	57.563	0.208467
Nrg3_wildtype	DN99	13	4	49.969	0.0800496
Nrg3_wildtype	DN99	14	23	43.486	0.528906
Nrg3_wildtype	DN99	15	4	41.823	0.0956412
Nrg3_wildtype	DN99	16	10	60.935	0.164109
Nrg3_wildtype	DN99	17	5	37.081	0.13484
Nrg3_wildtype	DN100	1	13	55.036	0.236209
Nrg3_wildtype	DN100	2	5	51.39	0.0972952
Nrg3_wildtype	DN100	3	4	50.72	0.0788644
Nrg3_wildtype	DN100	4	13	56.075	0.231832
Nrg3_wildtype	DN100	5	4	60.195	0.0664507
Nrg3_wildtype	DN100	6	5	37.477	0.133415
Nrg3_wildtype	DN100	7	7	49.07	0.142653
Nrg3_wildtype	DN100	8	1	48.476	0.0206288
Nrg3_wildtype	DN100	9	9	52.874	0.170216
Nrg3_wildtype	DN100	10	3	42.438	0.0706914
Nrg3_wildtype	DN100	11	2	49.707	0.0402358
Nrg3_wildtype	DN100	12	5	49.428	0.101157
Nrg3_wildtype	DN100	13	5	51.103	0.0978416
Nrg3_wildtype	DN100	14	1	50.573	0.0197734
Nrg3_wildtype	DN100	15	2	56.958	0.0351136
Nrg3_wildtype	DN100	16	19	54.559	0.348247
Nrg3_wildtype	DN100	17	6	43.816	0.136936
Nrg3_wildtype	DN100	18	5	56.457	0.088563
Nrg3_wildtype	DN100	19	2	53.184	0.0376053
Nrg3_wildtype	DN100	20	7	45.881	0.152569
Nrg3_wildtype	DN100	21	3	55.021	0.0545246
Nrg3_wildtype	DN100	22	10	48.904	0.204482
Nrg3_wildtype	DN100	23	6	44.521	0.134768
Nrg3_wildtype	DN100	24	5	47.376	0.105539
Nrg3_wildtype	DN100	25	7	47.011	0.148901
Nrg3_wildtype	DN100	26	7	44.263	0.158146
Nrg3_wildtype	DN100	27	14	55.328	0.253036
Nrg3_mutant	DN89	1	4	51.325	0.0779347
Nrg3_mutant	DN89	2	2	42.965	0.0465495
Nrg3_mutant	DN89	3	9	55.009	0.16361
Nrg3_mutant	DN89	4	3	58.488	0.0512926
Nrg3_mutant	DN89	5	4	56.38	0.0709471
Nrg3_mutant	DN89	6	7	47.75	0.146597
Nrg3_mutant	DN89	7	2	48.581	0.0411684
Nrg3_mutant	DN89	8	3	42.399	0.0707564
Nrg3_mutant	DN89	9	7	61.506	0.11381
Nrg3_mutant	DN89	10	3	40.831	0.0734736
Nrg3_mutant	DN89	11	3	39.603	0.0757518
Nrg3_mutant	DN89	12	1	39.29	0.0254518
Nrg3_mutant	DN89	13	4	43.251	0.0924834
Nrg3_mutant	DN89	14	0	37.361	0
Nrg3_mutant	DN89	15	3	44.964	0.06672
Nrg3_mutant	DN89	16	2	40.935	0.0488579
Nrg3_mutant	DN89	17	1	49.721	0.0201122
Nrg3_mutant	DN89	18	6	44.064	0.136166
Nrg3_mutant	DN89	19	1	43.846	0.0228071
Nrg3_mutant	DN89	20	0	41.517	0
Nrg3_mutant	DN90	1	6	42.86	0.139991
Nrg3_mutant	DN90	2	8	46.203	0.173149
Nrg3_mutant	DN90	3	8	48.529	0.16485
Nrg3_mutant	DN90	4	8	51.286	0.155988
Nrg3_mutant	DN90	5	2	55.912	0.0357705
Nrg3_mutant	DN90	6	4	43.429	0.0921044
Nrg3_mutant	DN90	7	7	42.603	0.164308
Nrg3_mutant	DN90	8	5	42.548	0.117514
Nrg3_mutant	DN90	9	4	40.404	0.0990001
Nrg3_mutant	DN90	10	3	51.878	0.057828
Nrg3_mutant	DN90	11	0	54.829	0
Nrg3_mutant	DN90	12	9	64.162	0.14027
Nrg3_mutant	DN90	13	3	64.822	0.0462806
Nrg3_mutant	DN90	14	6	56.783	0.105665
Nrg3_mutant	DN90	15	0	52.392	0
Nrg3_mutant	DN90	16	1	47.258	0.0211604
Nrg3_mutant	DN90	17	13	69.786	0.186284
Nrg3_mutant	DN90	18	5	54.141	0.0923515
Nrg3_mutant	DN90	19	5	47.915	0.104351
Nrg3_mutant	DN90	20	17	63.788	0.266508
Nrg3_mutant	DN90	21	10	61.431	0.162784
Nrg3_mutant	DN90	22	7	47.851	0.146287
Nrg3_mutant	DN90	23	2	49.188	0.0406603
Nrg3_mutant	DN90	24	3	36.047	0.0832247
Nrg3_mutant	DN90	25	8	60.664	0.131874
Nrg3_mutant	DN90	26	3	44.232	0.0678242
Nrg3_mutant	DN96	1	5	49.779	0.100444
Nrg3_mutant	DN96	2	5	55.038	0.0908463
Nrg3_mutant	DN96	3	1	67.715	0.0147678
Nrg3_mutant	DN96	4	1	49.281	0.0202918
Nrg3_mutant	DN96	5	3	53.405	0.0561745
Nrg3_mutant	DN96	6	0	53.662	0
Nrg3_mutant	DN96	7	4	55.828	0.0716486
Nrg3_mutant	DN96	8	5	55.358	0.0903212
Nrg3_mutant	DN96	9	6	57.307	0.104699
Nrg3_mutant	DN96	10	1	45.894	0.0217893
Nrg3_mutant	DN96	11	1	46.606	0.0214565
Nrg3_mutant	DN96	12	0	52	0
Nrg3_mutant	DN96	13	6	57.71	0.103968
Nrg3_mutant	DN96	14	0	55.028	0
Nrg3_mutant	DN96	15	7	50.805	0.137782
Nrg3_mutant	DN96	16	1	49.086	0.0203724
Nrg3_mutant	DN91	1	4	41.613	0.0961238
Nrg3_mutant	DN91	2	9	47.286	0.190331
Nrg3_mutant	DN91	3	5	44.478	0.112415
Nrg3_mutant	DN91	4	6	60.46	0.0992392
Nrg3_mutant	DN91	5	4	49.04	0.0815661
Nrg3_mutant	DN91	6	7	53.028	0.132006
Nrg3_mutant	DN91	7	4	49.807	0.08031
Nrg3_mutant	DN91	8	6	44.985	0.133378
Nrg3_mutant	DN91	9	12	39.247	0.305756
Nrg3_mutant	DN91	10	3	40.063	0.0748821
Nrg3_mutant	DN91	11	8	52.063	0.15366
Nrg3_mutant	DN91	12	1	46.514	0.0214989
Nrg3_mutant	DN91	13	17	49.275	0.345003
Nrg3_mutant	DN91	14	3	47.589	0.0630398
Nrg3_mutant	DN91	15	2	51.64	0.0387297
Nrg3_mutant	DN91	16	2	73.624	0.0271651
Nrg3_mutant	DN91	17	3	44.83	0.0669195
Nrg3_mutant	DN91	18	4	52.378	0.0763679
Nrg3_mutant	DN91	19	0	49.34	0
Nrg3_mutant	DN91	20	3	55.197	0.0543508
Nrg3_mutant	DN91	21	4	64.835	0.0616951
Nrg3_mutant	DN91	22	3	54.676	0.0548687
Nrg3_mutant	DN98	1	3	40.984	0.0731993
Nrg3_mutant	DN98	2	0	46.686	0
Nrg3_mutant	DN98	3	1	47.886	0.0208829
Nrg3_mutant	DN98	4	2	61.075	0.0327466
Nrg3_mutant	DN98	5	4	51.778	0.0772529
Nrg3_mutant	DN98	6	6	50.423	0.118993
Nrg3_mutant	DN98	7	5	51.509	0.0970704
Nrg3_mutant	DN98	8	1	46.44	0.0215332
Nrg3_mutant	DN98	9	1	42.026	0.0237948
Nrg3_mutant	DN98	10	3	45.264	0.0662778
Nrg3_mutant	DN98	11	4	62.364	0.0641396
Nrg3_mutant	DN98	12	4	47.319	0.0845326
Nrg3_mutant	DN98	13	4	42.399	0.0943418
Nrg3_mutant	DN98	14	3	39.916	0.0751578
Nrg3_mutant	DN98	15	1	40.028	0.0249825
Nrg3_mutant	DN98	16	1	43.069	0.0232186
Nrg3_mutant	DN98	17	1	45.009	0.0222178
Nrg3_mutant	DN97	1	0	53.182	0
Nrg3_mutant	DN97	2	11	53.799	0.204465
Nrg3_mutant	DN97	3	2	57.595	0.0347252
Nrg3_mutant	DN97	4	12	53.053	0.226189
Nrg3_mutant	DN97	5	6	58.233	0.103034
Nrg3_mutant	DN97	6	3	58.29	0.0514668
Nrg3_mutant	DN97	7	2	58.473	0.0342038
Nrg3_mutant	DN97	8	15	47.904	0.313126
Nrg3_mutant	DN97	9	2	57.282	0.034915
Nrg3_mutant	DN97	10	3	44.082	0.068055
Nrg3_mutant	DN97	11	0	65.468	0
Nrg3_mutant	DN97	12	7	35.421	0.197623
Nrg3_mutant	DN97	13	5	52.936	0.0944537
Nrg3_mutant	DN97	14	7	51.758	0.135245
Nrg3_mutant	DN97	15	5	50.373	0.0992595
Nrg3_mutant	DN97	16	3	51.574	0.0581688
Nrg3_mutant	DN97	17	5	57.645	0.0867378
Nrg3_mutant	DN97	18	7	54.98	0.127319
Nrg3_mutant	DN97	19	1	50.836	0.0196711
Nrg3_mutant	DN97	20	4	53.195	0.075195
Nrg3_mutant	DN97	21	5	41.465	0.120584
Nrg3_mutant	DN97	22	5	42.347	0.118072
