# Supplementary material for: Subcellular sorting of neuregulins controls the assembly of excitatory-inhibitory cortical circuits
Source: eLife. 2020 Dec 15;9:e57000. doi: 10.7554/eLife.57000 (PMC7755390; doi:10.7554/eLife.57000)
Supplement: Figure 1—source data 2. [file elife-57000-fig1-data2.xlsx]

## Sheet: Sheet1
Table 1. Summary of data and statistical analyses for Figures 1-6 and figure supplements.
FIGURE 1	Measurement	Values	N	Statistical test	P-value
Figure 1C	Density of GAD65+/CB1R+ boutons innervating tdT+ somas (mean ± s.e.m.)	Nrg1+/+: 0.1289 ± 0.0066; Nrg1F/F: 0.1004 ± 0.0052	[Cells] Nrg1+/+: n = 73; Nrg1F/F: n = 94	Student’s t-test	P < 0.01 (**)
			[Brains] Nrg1+/+: n = 5; Nrg1F/F: n = 5
		Nrg3+/+: 0.1343 ± 0.0048; Nrg3F/F: 0.1330 ± 0.0059	[Cells] Nrg3+/+: n = 96; Nrg3F/F: n = 100	Student’s t-test	P = 0.867
			[Brains] Nrg3+/+: n = 6; Nrg3F/F: n = 6
Figure 1E	Density of VGlut1+/tdT+/ PSD95+ synapses innervating PV+ somas (mean ± s.e.m.)	Nrg1+/+: 0.1227 ± 0.0085; Nrg1F/F: 0.1226 ± 0.0071	[Cells] Nrg1+/+: n = 101; Nrg1F/F: n = 110	Student’s t-test	P = 0.993
			[Brains] Nrg1+/+: n = 5; Nrg1F/F: n = 5
		Nrg3+/+: 0.1292 ± 0.0075; Nrg3F/F: 0.0809 ± 0.0104	[Cells] Nrg3+/+: n = 126; Nrg3F/F: n = 123	Student’s t-test	P < 0.01 (**)
			[Brains] Nrg3+/+: n = 6; Nrg3F/F: n = 6
Figure 1 – figure supplement 2	Measurement	Values	N	Statistical test	P-value
Figure 1 – figure supplement 2D	Density of PV+ interneurons per layer (%) (mean ± s.e.m.)	Nrg1+/+: [L1] 0.00 ± 0.00 %, [L2-3] 73.82 ± 3.10 %, [L4] 171.54 ± 2.55 %, [L5] 143.12 ± 5.55, [L6] 83.50 ± 3.50 %; Nrg1F/F: [L1] 0.00 ±0.00 %, [L2-3] 76.74 ± 2.48 %, [L4] 175.98 ± 9.61 %, [L5] 146.08 ± 5.77 %, [L6] 84.10 ± 5.36 %	[ROIs] Nrg1+/+: n = 63; Nrg1F/F: n = 45	Kruskal-Wallis rank sum test	P = 0.894
			[Brains] Nrg1+/+: n = 7; Nrg1F/F: n = 5
	Total density of PV+ interneurons (%) (mean ± s.e.m.)	Nrg1+/+: 103.27 ± 3.03 %; Nrg1F/F: 105.09 ± 2.64 %	[ROIs] Nrg1+/+: n = 63; Nrg1F/F: n = 45	Mann-Whitney U-test	P = 0.876
			[Brains] Nrg1+/+: n = 7; Nrg1F/F: n = 5
	Density of PV+ interneurons per layer (%) (mean ± s.e.m.)	Nrg3+/+: [L1] 0.00 ± 0.00 %, [L2-3] 74.58 ± 2.27 %, [L4] 157.63 ± 2.99 %, [L5] 149.79 ± 10.06, [L6] 79.24 ± 3.91 %; Nrg3F/F: [L1] 0.00 ± 0.00 %, [L2-3] 70.93 ± 1.80 %, [L4] 168.47 ± 5.10 %, [L5] 155.67 ± 7.08 %, [L6] 85.45 ± 5.62 %	[ROIs] Nrg3+/+: n = 50; Nrg3F/F: n = 51	Kruskal-Wallis rank sum test	P = 0.824
			[Brains] Nrg3+/+: n = 6; Nrg3F/F: n = 6
	Total density of PV+ interneurons (%) (mean ± s.e.m.)	Nrg3+/+: 100.23 ± 3.40 %; Nrg3F/F: 104.36 ± 3.61 %	[ROIs] Nrg3+/+: n = 50; Nrg3F/F: n = 51	Student’s t-test	P = 0.425
			[Brains] Nrg3+/+: n = 6; Nrg3F/F: n = 6
Figure 1 – figure supplement 3	Measurement	Values	N	Statistical test	P-value
Figure 1 – figure supplement 3B	Proportion of clusters CB1R+ that are also GAD65+	Nrg1+/+: 0.6778 ± 0.0218; Nrg1F/F: 0.7037 ± 0.0111	[ROIs] Nrg1+/+: n = 40; Nrg1F/F: n = 40	Student’s t-test	P = 0.329
			[Brains] Nrg1+/+: n = 4; Nrg1F/F: n = 4
		Nrg3+/+: 0.6448 ± 0.0222; Nrg3F/F: 0.6721 ± 0.0264	[ROIs] Nrg3+/+: n = 40; Nrg3F/F: n = 40	Student’s t-test	P = 0.461
			[Brains] Nrg3+/+: n = 4; Nrg3F/F: n = 4
Figure 1 – figure supplement 3D	Proportion of clusters Syt2+ that are also Gephyrin+	Nrg1+/+: 0.5054 ± 0.0452; Nrg1F/F: 0.5247 ± 0.0319	[ROIs] Nrg1+/+: n = 40; Nrg1F/F: n = 40	Student’s t-test	P = 0.739
			[Brains] Nrg1+/+: n = 4; Nrg1F/F: n = 4
		Nrg3+/+: 0.4965 ± 0.0287; Nrg3F/F: 0.4874 ± 0.018	[ROIs] Nrg3+/+: n = 40; Nrg3F/F: n = 40	Student’s t-test	P = 0.799
			[Brains] Nrg3+/+: n = 4; Nrg3F/F: n = 4
Figure 1 – figure supplement 3F	Proportion of clusters VGlut1+ that are also PSD95+	Nrg1+/+: 0.7157 ± 0.0178; Nrg1F/F: 0.6996 ± 0.0185	[ROIs] Nrg1+/+: n = 40; Nrg1F/F: n = 40	Student’s t-test	P = 0.552
			[Brains] Nrg1+/+: n = 4; Nrg1F/F: n = 4
		Nrg3+/+: 0.7489 ± 0.0129; Nrg3F/F: 0.7543 ± 0.0088	[ROIs] Nrg3+/+: n = 40; Nrg3F/F: n = 40	Student’s t-test	P = 0.741
			[Brains] Nrg3+/+: n = 4; Nrg3F/F: n = 4
Figure 1 – figure supplement 4	Measurement	Values	N	Statistical test	P-value
Figure 1 – figure supplement 4C	Density of GAD67+ boutons innervating tdT+ axon initial segments (mean ± s.e.m.)	Nrg1+/+: 0.3354 ± 0.3208; Nrg1F/F: 0.2691 ± 0.2470	[Cells] Nrg1+/+: n = 178; Nrg1F/F: n = 196	Mann-Whitney U-test	P < 0.01 (**)
			[Brains] Nrg1+/+: n = 6; Nrg1F/F: n = 6
		Nrg3+/+: 0.3392 ± 0.0093; Nrg3F/F: 0.3385 ± 0.0098	[Cells] Nrg3+/+: n = 139; Nrg3F/F: n = 127	Student’s t-test	P = 0.959
			[Brains] Nrg3+/+: n = 5; Nrg3F/F: n = 5
Figure 1 – figure supplement 5	Measurement	Values	N	Statistical test	P-value
Figure 1 – figure supplement 5C	Density of Syt+ boutons innervating tdT+ somas (mean ± s.e.m.)	Nrg1+/+: 0.3562 ± 0.0141; Nrg1F/F: 0.3603 ± 0.0062	[Cells] Nrg1+/+: n = 108; Nrg1F/F: n = 109	Student’s t-test	P = 0.803
			[Brains] Nrg1+/+: n = 4; Nrg1F/F: n = 4
		Nrg3+/+: 0.3512 ± 0.0112; Nrg3F/F: 0.3614 ± 0.0114	[Cells] Nrg3+/+: n = 70; Nrg3F/F: n = 80	Student’s t-test	P = 0.618
			[Brains] Nrg3+/+: n = 3; Nrg3F/F: n = 3
Figure 1 – figure supplement 5D	Density of Syt+/ Geph+ synapses innervating tdT+ somas (mean ± s.e.m.)	Nrg1+/+: 0.0598 ± 0.0071; Nrg1F/F: 0.0616 ± 0.0035	[Cells] Nrg1+/+: n = 108; Nrg1F/F: n = 109	Student’s t-test	P = 0.828
			[Brains] Nrg1+/+: n = 4; Nrg1F/F: n = 4
		Nrg3+/+: 0.0597 ± 0.0021; Nrg3F/F: 0.614 ± 0.0024	[Cells] Nrg3+/+: n = 70; Nrg3F/F: n = 80	Student’s t-test	P = 0.609
			[Brains] Nrg3+/+: n = 3; Nrg3F/F: n = 3
Figure 1 – figure supplement 6	Measurement	Values	N	Statistical test	P-value
Figure 1 – figure supplement 6B	Density of tdT+ pyramidal cells (mean ± s.e.m.)	Nrg1+/+: 382.05 ± 3.10; Nrg1F/F: 381.67 ± 2.65	[ROIs] Nrg1+/+: n = 18; Nrg1F/F: n = 18	Student’s t-test	P = 0.929
			[Brains] Nrg1+/+: n = 5; Nrg1F/F: n = 5
		Nrg3+/+: 382.60 ± 4.44; Nrg3F/F: 383.54 ± 3.31	[ROIs] Nrg3+/+: n = 18; Nrg3F/F: n = 18	Student’s t-test	P = 0.869
			[Brains] Nrg3+/+: n = 5; Nrg3F/F: n = 5
Figure 1 – figure supplement 7	Measurement	Values	N	Statistical test	P-value
Figure 1 – figure supplement 7B	Density of VGlut1+/tdT-/ PSD95+ synapses innervating PV+ somas (mean ± s.e.m.)	Nrg1+/+: 0.0596 ± 0.0065; Nrg1F/F: 0.0524 ± 0.0036	[Cells] Nrg1+/+: n = 101; Nrg1F/F: n = 110	Student’s t-test	P = 0.36
			[Brains] Nrg1+/+: n = 5; Nrg1F/F: n = 5
		Nrg3+/+: 0.0586 ± 0.0073; Nrg3F/F: 0.0580 ± 0.0026	[Cells] Nrg3+/+: n = 126; Nrg3F/F: n = 123	Student’s t-test	P = 0.94
			[Brains] Nrg3+/+: n = 6; Nrg3F/F: n = 6
FIGURE 2	Measurement	Values	N	Statistical test	P-value
Figure 2C	Density of GAD65+/CB1R+ boutons innervating GFP+ somas (mean ± s.e.m.)	Control: 0.1133 ± 0.0073; Nrg1: 0.1544 ± 0.0076; Nrg3: 0.1152 ± 0.0051	[Cells] Control: n = 80; Nrg1: n = 61; Nrg3: n = 87	One-way ANOVA, post-hoc Tukey’s range test	Nrg1: P < 0.001 (**)
			[Brains] Control: n = 5; Nrg1: n = 4; Nrg3: n = 5		Nrg3: P = 0.976
Figure 2E	Density of VGlut1+/GFP+/ PSD95+ synapses innervating PV+ somas (mean ± s.e.m.)	Control: 0.0905 ± 0.0045; Nrg1: 0.0865 ± 0.0057; Nrg3: 0.1296 ± 0.0048	[Cells] Control: n = 147; Nrg1: n = 116; Nrg3: n = 101	One-way ANOVA, post-hoc Tukey’s range test	Nrg1: P = 0.999
			[Brains] Control: n = 8; Nrg1: n = 5; Nrg3: n = 6		Nrg3: P < 0.001 (***)
Figure 2 – figure supplement 1	Measurement	Values	N	Statistical test	P-value
Figure 2 – figure supplement 1B-C	Density of GFP+ pyramidal cells (mean ± s.e.m.)	Control: 256.74 ± 3.31; Nrg1: 256.98 ± 2.82; Nrg3: 255.91 ± 2.98	[ROIs] Control: n = 24; Nrg1: n = 16; Nrg3: n = 16	One-way ANOVA	P = 0.975
			[Brains] Control: n = 8; Nrg1: n = 5; Nrg3: n = 5
		Control: 254.15 ± 2.27; Nrg1Ct:Nrg3: 255.32 ± 2.50; Nrg3Ct:Nrg1: 254.93 ± 2.65; Nrg1EGF:Nrg3: 255.61 ± 3.17; Nrg3EGFNrg1: 255.58 ± 3.07	[ROIs] Control: n = 30; Nrg1Ct:Nrg3: n = 24; Nrg3Ct:Nrg1: n = 24; Nrg1EGF:Nrg3: n = 22; Nrg3EGF:Nrg1: n = 22	One-way ANOVA	P = 0.994
			[Brains] Control: n = 8; Nrg1Ct:Nrg3: n = 7; Nrg3Ct:Nrg1: n = 7; Nrg1EGF:Nrg3: n = 6; Nrg3EGF:Nrg1: n = 6
Figure 2 – figure supplement 2	Measurement	Values	N	Statistical test	P-value
Figure 2 – figure supplement 2B	Proportion of clusters CB1R+ that are also GAD65+	Control: 0.6151 ± 0.0072; Nrg1: 0.6041 ± 0.0167; Nrg3: 0.5927 ± 0.0105	[ROIs] Control: n = 40; Nrg1: n = 40; Nrg3: n = 40	One-way ANOVA	P = 0.455
			[Brains] Control: n = 4; Nrg1: n = 4; Nrg3: n = 4
Figure 2 – figure supplement 2D	Proportion of clusters VGlut1+ that are also PSD95+	Control: 0.6032 ± 0.0206; Nrg1: 0.5977 ± 0.0271; Nrg3: 0.6456 ± 0.0200	[ROIs] Control: n = 40; Nrg1: n = 40; Nrg3: n = 40	One-way ANOVA	P = 0.313
			[Brains] Control: n = 4; Nrg1: n = 4; Nrg3: n = 4
FIGURE 3	Measurement	Values	N	Statistical test	P-value
Figure 3C	Proportion of HA/GFP double-positive somas (%) (mean ± s.e.m.)	Nrg1: 81.75 ± 1.75 %; Nrg3: 2.61 ± 0.37 %	[ROIs] Nrg1: n = 32; Nrg3: n = 32	Student’s t-test	P < 0.001 (***)
			[Brains] Nrg1: n = 4; Nrg3: n = 4
	Percentage of HA/GFP colocalization in neuropil (%) (mean ± s.e.m.)	Nrg1: 0.75 ± 0.13 %; Nrg3: 40.66 ± 0.58 %	[ROIs] Nrg1: n = 32; Nrg3: n = 32	Student’s t-test	P < 0.001 (***)
			[Brains] Nrg1: n = 4; Nrg3: n = 4
Figure 3 – figure supplement 1	Measurement	Values	N	Statistical test	P-value
Figure 3 – figure supplement 3D	Density of Nrg1+ puncta (clusters/ 100 μm2) (mean ± s.e.m.)	Nex+/+;Nrg1F/F: 5.233 ± 0.717 (Str. Pyr.) (1) NexCre/+;Nrg1F/F: 1.155 ± 0.125 (Str. Pyr.) (2) Nex+/+;Nrg1F/F: 0.884 ± 0.136 (Str. Rad.) (3) NexCre/+;Nrg1F/F: 1.091 ± 0.216 (Str. Rad.) (4)	[ROIs] 1: n = 40; 2: n = 40; 3: n = 40; 4: n = 40	Two-way ANOVA, post-hoc Tukey’s range test	1-2: P < 0.001 (***) 1-3: P < 0.001 (***) 3-4: P = 0.980
			[Brains] 1: n = 4; 2: n = 4; 3: n = 4; 4: n = 4
Figure 3 – figure supplement 2	Measurement	Values	N	Statistical test	P-value
Figure 3 – figure supplement 2B	Density of Nrg3+ puncta in CA1 region (clusters/ 1,000 μm2) (mean ± s.e.m.)	Nex+/+;Nrg3F/F: 5.233 ± 0.717 (All) (1) NexCre/+;Nrg3F/F: 1.155 ± 0.125 (All) (2) Nex+/+;Nrg3F/F: 0.884 ± 0.136 (Contact PV) (3) NexCre/+;Nrg3F/F: 1.091 ± 0.216 (Contact PV) (4) Nex+/+;Nrg3F/F: 0.884 ± 0.136 (Not contact) (5) NexCre/+;Nrg3F/F: 1.091 ± 0.216 (Not contact) (6)	[ROIs] Nex+/+;Nrg3F/F: n = 36; NexCre/+;Nrg3F/F: n = 36	Two-way ANOVA, post-hoc Tukey’s range test	1-2: P < 0.001 (***) 3-4: P < 0.001 (***) 5-6: P < 0.01 (**)
			[Brains] Nex+/+;Nrg3F/F: n = 3; NexCre/+;Nrg3F/F: n = 3
Figure 3 – figure supplement 2D	Density of Nrg3+ puncta in cerebral cortex (clusters/1,000 μm2) (mean ± s.e.m.)	Nex+/+;Nrg3F/F: 14.050 ± 0.388 (All) (1) NexCre/+;Nrg3F/F: 2.531 ± 0.064 (All) (2) Nex+/+;Nrg3F/F: 12.429 ± 0.622 (Contact PV) (3) NexCre/+;Nrg3F/F: 1.956 ± 0.069 (Contact PV) (4) Nex+/+;Nrg3F/F: 1.621 ± 0.249 (Not contact) (5) NexCre/+;Nrg3F/F: 0.575 ± 0.130 (Not contact) (6)	[ROIs] Nex+/+;Nrg3F/F: n = 36; NexCre/+;Nrg3F/F: n = 36	Two-way ANOVA, post-hoc Tukey’s range test	1-2: P < 0.001 (***) 3-4: P < 0.001 (***) 5-6: P = 0.269
			[Brains] Nex+/+;Nrg3F/F: n = 3; NexCre/+;Nrg3F/F: n = 3
Figure 3 – figure supplement 3	Measurement	Values	N	Statistical test	P-value
Figure 3 – figure supplement 3B	Proportion of GAD65+ boutons co-labelled with HA onto GFP+ somas (ratio) (mean ± s.e.m.)	Nrg1: 0.608 ± 0.036; Nrg3: 0.029 ± 0.009	[Cells] Nrg1: n = 34; Nrg3: n = 32	Student’s t-test	P < 0.001 (***)
			[Brains] Nrg1: n = 4; Nrg3: n = 4
Figure 3 – figure supplement 3D	Proportion of GAD65+ boutons co-labelled with HA onto NeuN+/GFP– somas (mean ± s.e.m.)	Nrg1: 0.012 ± 0.007; Nrg3: 0.014 ± 0.006	[Cells] Nrg1: n = 32; Nrg3: n = 32	Student’s t-test	P = 0.861
			[Brains] Nrg1: n = 4; Nrg3: n = 4
Figure 3 – figure supplement 4	Measurement	Values	N	Statistical test	P-value
Figure 3 – figure supplement 4B	Proportion of VGlut1+ boutons co-labelled with HA in GFP+ axons (ratio) (mean ± s.e.m.)	Nrg1: 0.040 ± 0.006; Nrg3: 0.686 ± 0.017	[Cells] Nrg1: n = 40; Nrg3: n = 50	Student’s t-test	P < 0.001 (***)
			[Brains] Nrg1: n = 4; Nrg3: n = 4
Figure 3 – figure supplement 5	Measurement	Values	N	Statistical test	P-value
Figure 3 – figure supplement 5C	Percentage of HA/GFP colocalization in neuropil (%) (mean ± s.e.m.)	Nrg1: 1.41 ± 0.27 %; Nrg3: 24.48 ± 1.76 %	[ROIs] Nrg1: n = 36; Nrg3: n = 36	Student’s t-test	P < 0.001 (***)
			[Brains] Nrg1: n = 4; Nrg3: n = 4
Figure 3 – figure supplement 5E	Proportion of VGlut1+ boutons co-labelled with HA in GFP+ axons (ratio) (mean ± s.e.m.)	Nrg1: 0.043 ± 0.006; Nrg3: 0.593 ± 0.024	[Cells] Nrg1: n = 42; Nrg3: n = 34	Student’s t-test	P < 0.001 (***)
			[Brains] Nrg1: n = 4; Nrg3: n = 4
FIGURE 4	Measurement	Values	N	Statistical test	P-value
Figure 4B	Proportion of HA/GFP double-positive somas (%) (mean ± s.e.m.)	Nrg1EGF:Nrg3: 81.09 ± 2.00 %; Nrg3EGF:Nrg1: 2.81 ± 0.26 %	[ROIs] Nrg1EGF:Nrg3: n = 40; Nrg3EGF:Nrg1: n = 40	Student’s t-test	P < 0.001 (***)
			[Brains] Nrg1EGF:Nrg3: n = 5; Nrg3EGF:Nrg1: n = 5
	Percentage of HA/GFP colocalization in neuropil (%) (mean ± s.e.m.)	Nrg1EGF:Nrg3: 0.31 ± 0.11 %; Nrg3EGF:Nrg1: 39.52 ± 0.77 %	[ROIs] Nrg1EGF:Nrg3: n = 40; Nrg3EGF:Nrg1: n = 40	Student’s t-test	P < 0.001 (***)
			[Brains] Nrg1EGF:Nrg3: n = 5; Nrg3EGF:Nrg1: n = 5
Figure 4D	Density of GAD65+/CB1R+ boutons innervating GFP+ somas (mean ± s.e.m.)	Control: 0.1055 ± 0.0040; Nrg1EGF:Nrg3: 0.1522 ± 0.0067; Nrg3EGF:Nrg1: 0.1036 ± 0.0050	[Cells] Control: n = 120; Nrg1EGF:Nrg3: n = 110; Nrg3EGF:Nrg1: n = 88	One-way ANOVA, post-hoc Tukey’s range test	Nrg3EGF:Nrg1: P < 0.001 (***)
			[Brains] Control: n = 6; Nrg1EGF:Nrg3: n = 6; Nrg3EGF:Nrg1: n = 5		Nrg1EGF:Nrg3: P = 0.968
Figure 4F	Density of VGlut1+/GFP+/ PSD95+ synapses innervating PV+ somas (mean ± s.e.m.)	Control: 0.0986 ± 0.0034; Nrg1EGF:Nrg3: 0.0973 ± 0.0052; Nrg3EGF:Nrg1: 0.1412 ± 0.0074	[Cells] Control: n = 167; Nrg1EGF:Nrg3: n = 94; Nrg3EGF:Nrg1: n = 96	One-way ANOVA, post-hoc Tukey’s range test	Nrg1EGF:Nrg3: P = 0.982
			[Brains] Control: n = 9; Nrg1EGF:Nrg3: n = 6; Nrg3EGF:Nrg1: n = 6		Nrg3EGF:Nrg1: P < 0.001 (***)
Figure 4 – figure supplement 1	Measurement	Values	N	Statistical test	P-value
Figure 4 – figure supplement 1B	Proportion of GAD65+ boutons co-labelled with HA onto GFP+ somas (ratio) (mean ± s.e.m.)	Nrg1: 0.608 ± 0.036 (1) Nrg3: 0.029 ± 0.009 (2) Nrg1EGF:Nrg3: 0.566 ± 0.045 (3) Nrg3EGF:Nrg1: 0.031 ± 0.006 (4)	[Cells] Nrg1: n = 34; Nrg3: n = 32; Nrg1EGF:Nrg3: n = 32; Nrg3EGF:Nrg1: n = 32	One-way ANOVA, post-hoc Tukey’s range test	1-3: P = 0.745 1-4: P < 0.001 (***) 3-4: P < 0.001 (***)
			[Brains] Nrg1: n = 4; Nrg3: n = 4; Nrg1EGF:Nrg3: n = 4; Nrg3EGF:Nrg1: n = 4
Figure 4 – figure supplement 2	Measurement	Values	N	Statistical test	P-value
Figure 4 – figure supplement 2B	Proportion of VGlut1+/ boutons co-labelled with HA in GFP+ axons (ratio) (mean ± s.e.m.)	Nrg1: 0.040 ± 0.006 (1) Nrg3: 0.686 ± 0.017 (2) Nrg1EGF:Nrg3: 0.043 ± 0.008 (3) Nrg3EGF:Nrg1: 0.667 ± 0.020 (4)	[Cells] Nrg1: n = 40; Nrg3: n = 50; Nrg1EGF:Nrg3: n = 42; Nrg3EGF:Nrg1: n = 39	One-way ANOVA, post-hoc Tukey’s range test	2-3: P < 0.001 (***) 2-4: P = 0.775 3-4: P < 0.001 (***)
			[Brains] Nrg1: n = 4; Nrg3: n = 4; Nrg1EGF:Nrg3: n = 4; Nrg3EGF:Nrg1: n = 4
FIGURE 5	Measurement	Values	N	Statistical test	P-value
Figure 5B	Proportion of HA/GFP double-positive somas (%) (mean ± s.e.m.)	Nrg1Ct:Nrg3: 6.19 ± 1.03 %; Nrg3Ct:Nrg1: 45.67 ± 4.29 %	[ROIs] Nrg1Ct:Nrg3: n = 40; Nrg3Ct:Nrg1: n = 40	Student’s t-test	P < 0.001 (***)
			[Brains] Nrg1Ct:Nrg3: n = 5; Nrg3Ct:Nrg1: n = 5
	Percentage of HA/GFP colocalization in neuropil (%) (mean ± s.e.m.)	Nrg1Ct:Nrg3: 13.27 ± 0.77 %; Nrg3Ct:Nrg1: 10.46 ± 0.64 %	[ROIs] Nrg1Ct:Nrg3: n = 40; Nrg3Ct:Nrg1: n = 40	Student’s t-test	P < 0.05 (*)
			[Brains] Nrg1Ct:Nrg3: n = 5; Nrg3Ct:Nrg1: n = 5
Figure 5D	Density of GAD65+/CB1R+ boutons innervating GFP+ somas (mean ± s.e.m.)	Control: 0.1055 ± 0.0040; Nrg1Ct:Nrg3: 0.1118 ± 0.0036; Nrg3Ct:Nrg1: 0.1412 ± 0.0064	[Cells] Control: n = 120; Nrg1Ct:Nrg3: n = 136; Nrg3Ct:Nrg1: n = 127	One-way ANOVA, post-hoc Tukey’s range test	Nrg1Ct:Nrg3: P = 0.632
			[Brains] Control: n = 6; Nrg1Ct:Nrg3: n = 6; Nrg3Ct:Nrg1: n = 6		Nrg3Ct:Nrg1: P < 0.001 (***)
Figure 5F	Density of VGlut1+/GFP+/ PSD95+ synapses innervating PV+ somas (mean ± s.e.m.)	Control: 0.0986 ± 0.0034; Nrg1Ct:Nrg3: 0.1050 ± 0.0037; Nrg3Ct:Nrg1: 0.1009 ± 0.0048	[Cells] Control: n = 167; Nrg1Ct:Nrg3: n = 121; Nrg3Ct:Nrg1: n = 135	One-way ANOVA, post-hoc Tukey’s range test	Nrg1Ct:Nrg3: P = 0.489
			[Brains] Control: n = 9; Nrg1Ct:Nrg3: n = 7; Nrg3Ct:Nrg1: n = 7		Nrg3Ct:Nrg3: P = 0.909
Figure 5 – figure supplement 2	Measurement	Values	N	Statistical test	P-value
Figure 5 – figure supplement 2B	Proportion of GAD65+ boutons co-labelled with HA onto GFP+ somas (ratio) (mean ± s.e.m.)	Nrg1: 0.608 ± 0.036 (1) Nrg3: 0.029 ± 0.009 (2) Nrg1Ct:Nrg3: 0.026 ± 0.004 (3) Nrg3Ct:Nrg1: 0.525 ± 0.022 (4)	[Cells] Nrg1: n = 34; Nrg3: n = 32; Nrg1Ct:Nrg3: n = 32; Nrg3Ct:Nrg1: n = 34	One-way ANOVA, post-hoc Tukey’s range test	1-3: P < 0.001 (***) 1-4: P = 0.077 3-4: P < 0.001 (***)
			[Brains] Nrg1: n = 4; Nrg3: n = 4; Nrg1Ct:Nrg3: n = 4; Nrg3Ct:Nrg1: n = 4
Figure 5 – figure supplement 3	Measurement	Values	N	Statistical test	P-value
Figure 5 – figure supplement 3B	Proportion of VGlut1+/ boutons co-labelled with HA in GFP+ axons (ratio) (mean ± s.e.m.)	Nrg1: 0.040 ± 0.006 (1) Nrg3: 0.686 ± 0.017 (2) Nrg1Ct:Nrg3: 0.457 ± 0.021 (3) Nrg3Ct:Nrg1: 0.176 ± 0.024 (4)	[Cells] Nrg1: n = 40; Nrg3: n = 50; Nrg1Ct:Nrg3: n = 50; Nrg3Ct:Nrg1: n = 42	One-way ANOVA, post-hoc Tukey’s range test	2-3: P < 0.001 (***) 2-4: P < 0.001 (***) 3-4: P < 0.001 (***)
			[Brains] Nrg1: n = 4; Nrg3: n = 4; Nrg1Ct:Nrg3: n = 4; Nrg3Ct:Nrg1: n = 4
Figure 5 – figure supplement 3C	Intensity of HA+/VGlut1+ boutons in GFP+ axons (mean ± s.e.m.)	Nrg3: 166.65 ± 4.40 (1) Nrg1Ct:Nrg3: 82.25 ± 5.34 (2) Nrg3Ct:Nrg1: 59.20 ± 4.75 (3)	[Cells] Nrg3: n = 50; Nrg1Ct:Nrg3: n = 50; Nrg3Ct:Nrg1: n = 42	One-way ANOVA, post-hoc Tukey’s range test	1-2: P < 0.001 (***) 1-3: P < 0.001 (***) 2-3: P < 0.05 (*)
			[Brains] Nrg3: n = 4; Nrg1Ct:Nrg3: n = 4; Nrg3Ct:Nrg1: n = 4
FIGURE 6	Measurement	Values	N	Statistical test	P-value
Figure 6B	Proportion of HA/GFP double-positive somas (%) (mean ± s.e.m.)	Nrg1ΔCt: 14.66 ± 1.01 %; Nrg3ΔCt: 12.04 ± 0.82 %	[ROIs] Nrg1ΔCt: n = 66; Nrg3ΔCt: n = 66	Mann-Whitney U-test	P = 0.093
			[Brains] Nrg1ΔCt: n = 6; Nrg3ΔCt: n = 6
	Percentage of HA/GFP colocalization in neuropil (%) (mean ± s.e.m.)	Nrg1ΔCt: 43.25 ± 1.05 %; Nrg3ΔCt: 44.11 ± 1.11 %	[ROIs] Nrg1ΔCt: n = 58; Nrg3ΔCt: n = 58	Student’s t-test	P = 0.589
			[Brains] Nrg1ΔCt: n = 6; Nrg3ΔCt: n = 6
Figure 6D	Density of GAD65+/CB1R+ boutons innervating GFP+ somas (mean ± s.e.m.)	Control: 0.1055 ± 0.0040; Nrg1ΔCt: 0.1256 ± 0.0041; Nrg3ΔCt: 0.1230 ± 0.0059	[Cells] Control: n = 120; Nrg1ΔCt: n = 145; Nrg3ΔCt: n = 138	One-way ANOVA, post-hoc Tukey’s range test	Nrg1ΔCt: P < 0.05 (*)
			[Brains] Control: n = 6; Nrg1ΔCt: n = 6; Nrg3ΔCt: n = 6		Nrg3ΔCt: P < 0.05 (*)
Figure 6F	Density of VGlut1+/GFP+/ PSD95+ synapses innervating PV+ somas (mean ± s.e.m.)	Control: 0.0986 ± 0.0034; Nrg1ΔCt: 0.1342 ± 0.0083; Nrg3ΔCt: 0.1345 ± 0.0036	[Cells] Control: n = 167; Nrg1ΔCt: n = 107; Nrg3ΔCt: n = 111	One-way ANOVA, post-hoc Tukey’s range test	Nrg1ΔCt: P < 0.001 (***)
			[Brains] Control: n = 9; Nrg1ΔCt: n = 5; Nrg3ΔCt: n = 5		Nrg3ΔCt: P < 0.001 (***)
Figure 6 – figure supplement 1	Measurement	Values	N	Statistical test	P-value
Figure 6 – figure supplement 1B	Proportion of GAD65+ boutons co-labelled with HA onto GFP+ somas (ratio) (mean ± s.e.m.)	Nrg1: 0.608 ± 0.036 (1) Nrg3: 0.029 ± 0.009 (2) Nrg1ΔCt: 0.401 ± 0.031 (3) Nrg3ΔCt: 0.356 ± 0.036 (4)	[Cells] Nrg1: n = 34; Nrg3: n = 32; Nrg1ΔCt: n = 34; Nrg3ΔCt: n = 43	One-way ANOVA, post-hoc Tukey’s range test	1-3: P < 0.01 (**) 1-4: P < 0.001 (***) 3-4: P = 0.739
			[Brains] Nrg1: n = 4; Nrg3: n = 4; Nrg1ΔCt: n = 4; Nrg3ΔC: n = 5
Figure 6 – figure supplement 2	Measurement	Values	N	Statistical test	P-value
Figure 6 – figure supplement 2B	Proportion of VGlut1+/ boutons co-labelled with HA in GFP+ axons (ratio) (mean ± s.e.m.)	Nrg1: 0.040 ± 0.006 (1) Nrg3: 0.686 ± 0.017 (2) Nrg1ΔCt: 0.656 ± 0.015 (3) Nrg3ΔCt: 0.702 ± 0.027 (4)	[Cells] Nrg1: n = 40; Nrg3: n = 50; Nrg1ΔCt: n = 38; Nrg3ΔCt: n = 36	One-way ANOVA, post-hoc Tukey’s range test	2-3: P = 0.689 2-4: P = 0.928 3-4: P = 0.304
			[Brains] Nrg1: n = 4; Nrg3: n = 4; Nrg1ΔCt: n = 5; Nrg3ΔC: n = 5
