# Supplementary material for: Subcellular sorting of neuregulins controls the assembly of excitatory-inhibitory cortical circuits
Source: eLife. 2020 Dec 15;9:e57000. doi: 10.7554/eLife.57000 (PMC7755390; doi:10.7554/eLife.57000)
Supplement: Figure 2—figure supplement 1—source data 1. [file elife-57000-fig2-figsupp1-data1.xlsx]

## Sheet: Wildtype_Nrg
Plasmid	Brain	ROI	Area_ROI	Count_gfp_cells	Density_gfp_cells
pSyn_Gfp	DN232	1	469748	113	240.554
pSyn_Gfp	DN232	2	448624	105	234.049
pSyn_Gfp	DN232	3	372639	113	303.242
pSyn_Gfp	DN234	1	454366	121	266.305
pSyn_Gfp	DN234	2	419987	105	250.008
pSyn_Gfp	DN234	3	402851	108	268.089
pSyn_Gfp	DN233	1	429504	114	265.423
pSyn_Gfp	DN233	2	466750	104	222.817
pSyn_Gfp	DN233	3	424113	102	240.502
pSyn_Gfp	DN235	1	438123	106	241.941
pSyn_Gfp	DN235	2	474030	122	257.368
pSyn_Gfp	DN235	3	461587	119	257.806
pSyn_Gfp	CO52	1	364208	93	255.349
pSyn_Gfp	CO52	2	362586	98	270.281
pSyn_Gfp	CO52	3	401246	92	229.286
pSyn_Gfp	CO53	1	340607	101	296.529
pSyn_Gfp	CO53	2	355218	85	239.29
pSyn_Gfp	CO53	3	293014	77	262.786
pSyn_Gfp	CO54	1	321267	83	258.352
pSyn_Gfp	CO54	2	306618	69	225.035
pSyn_Gfp	CO54	3	325701	86	264.046
pSyn_Gfp	CO55	1	304409	88	289.084
pSyn_Gfp	CO55	2	329137	74	224.831
pSyn_Gfp	CO55	3	294430	88	298.883
pSyn_Nrg1_pSyn_Gfp	DN240	1	384640	91	236.585
pSyn_Nrg1_pSyn_Gfp	DN240	2	402231	102	253.586
pSyn_Nrg1_pSyn_Gfp	DN240	3	351373	93	264.676
pSyn_Nrg1_pSyn_Gfp	DN241	1	361270	86	238.049
pSyn_Nrg1_pSyn_Gfp	DN241	2	336916	94	279.001
pSyn_Nrg1_pSyn_Gfp	DN241	3	400899	93	231.978
pSyn_Nrg1_pSyn_Gfp	DN243	1	392936	111	282.489
pSyn_Nrg1_pSyn_Gfp	DN243	2	457265	111	242.747
pSyn_Nrg1_pSyn_Gfp	DN243	3	448302	117	260.985
pSyn_Nrg1_pSyn_Gfp	DN219	1	443689	137	308.775
pSyn_Nrg1_pSyn_Gfp	DN219	2	465258	106	227.831
pSyn_Nrg1_pSyn_Gfp	DN219	3	429961	110	255.837
pSyn_Nrg1_pSyn_Gfp	DN228	1	399182	105	263.038
pSyn_Nrg1_pSyn_Gfp	DN228	2	399456	116	290.395
pSyn_Nrg1_pSyn_Gfp	DN228	3	370859	81	218.412
pSyn_Nrg1_pSyn_Gfp	DN228	4	426841	110	257.707
pSyn_Nrg3_pSyn_Gfp	CO25	1	442171	125	282.696
pSyn_Nrg3_pSyn_Gfp	CO25	2	397751	93	233.815
pSyn_Nrg3_pSyn_Gfp	CO25	3	372498	89	238.927
pSyn_Nrg3_pSyn_Gfp	CO28	1	397425	99	249.104
pSyn_Nrg3_pSyn_Gfp	CO28	2	311955	83	266.064
pSyn_Nrg3_pSyn_Gfp	CO28	3	451054	103	228.354
pSyn_Nrg3_pSyn_Gfp	CO29	1	328786	94	285.901
pSyn_Nrg3_pSyn_Gfp	CO29	2	409160	94	229.739
pSyn_Nrg3_pSyn_Gfp	CO29	3	375464	100	266.337
pSyn_Nrg3_pSyn_Gfp	CO30	1	351172	102	290.456
pSyn_Nrg3_pSyn_Gfp	CO30	2	409146	96	234.635
pSyn_Nrg3_pSyn_Gfp	CO30	3	358040	96	268.126
pSyn_Nrg3_pSyn_Gfp	CO31	1	367751	95	258.327
pSyn_Nrg3_pSyn_Gfp	CO31	2	338453	82	242.279
pSyn_Nrg3_pSyn_Gfp	CO31	3	317433	80	252.022
pSyn_Nrg3_pSyn_Gfp	CO31	4	288759	77	266.659

## Sheet: Chimeric_Nrg
Plasmid	Brain	ROI	Area_ROI	Count_gfp_cells	Density_gfp_cells
pSyn_Gfp	DN274	1	384154	92	239.488
pSyn_Gfp	DN274	2	377438	99	262.295
pSyn_Gfp	DN274	3	367640	90	244.805
pSyn_Gfp	DN275	1	465904	118	253.271
pSyn_Gfp	DN275	2	352480	99	280.867
pSyn_Gfp	DN275	3	444355	103	231.797
pSyn_Gfp	DN275	4	355647	105	295.237
pSyn_Gfp	DN276	1	415969	108	259.635
pSyn_Gfp	DN276	2	376631	116	307.994
pSyn_Gfp	DN276	3	433356	107	246.91
pSyn_Gfp	DN276	4	435553	101	231.889
pSyn_Gfp	DN277	1	401517	100	249.055
pSyn_Gfp	DN277	2	409446	103	251.559
pSyn_Gfp	DN277	3	369138	104	281.737
pSyn_Gfp	DN277	4	414459	99	238.866
pSyn_Gfp	DN278	1	470548	110	233.77
pSyn_Gfp	DN278	2	467072	124	265.484
pSyn_Gfp	DN278	3	443181	117	264
pSyn_Gfp	DN278	4	443086	111	250.516
pSyn_Gfp	DN279	1	449932	105	233.368
pSyn_Gfp	DN279	2	400603	107	267.098
pSyn_Gfp	DN279	3	369902	97	262.232
pSyn_Gfp	DN279	4	453035	111	245.014
pSyn_Gfp	DN280	1	419423	95	226.502
pSyn_Gfp	DN280	2	382683	97	253.473
pSyn_Gfp	DN280	3	360312	97	269.211
pSyn_Gfp	DN280	4	342175	86	251.334
pSyn_Gfp	DN281	1	369642	93	251.595
pSyn_Gfp	DN281	2	342695	81	236.362
pSyn_Gfp	DN281	3	369204	93	251.893
pSyn_Nrg1CtNrg3_pSyn_Gfp	DN413	1	373152	96	257.268
pSyn_Nrg1CtNrg3_pSyn_Gfp	DN413	2	432202	103	238.314
pSyn_Nrg1CtNrg3_pSyn_Gfp	DN413	3	405418	101	249.125
pSyn_Nrg1CtNrg3_pSyn_Gfp	DN427	1	456687	139	304.366
pSyn_Nrg1CtNrg3_pSyn_Gfp	DN427	2	465618	117	251.279
pSyn_Nrg1CtNrg3_pSyn_Gfp	DN427	3	443188	117	263.996
pSyn_Nrg1CtNrg3_pSyn_Gfp	DN427	4	446624	107	239.575
pSyn_Nrg1CtNrg3_pSyn_Gfp	DN431	1	475840	126	264.795
pSyn_Nrg1CtNrg3_pSyn_Gfp	DN431	2	439931	109	247.766
pSyn_Nrg1CtNrg3_pSyn_Gfp	DN431	3	450137	123	273.25
pSyn_Nrg1CtNrg3_pSyn_Gfp	DN431	4	471437	124	263.026
pSyn_Nrg1CtNrg3_pSyn_Gfp	DN432	1	446951	112	250.587
pSyn_Nrg1CtNrg3_pSyn_Gfp	DN432	2	424779	109	256.604
pSyn_Nrg1CtNrg3_pSyn_Gfp	DN432	3	464032	110	237.052
pSyn_Nrg1CtNrg3_pSyn_Gfp	DN416	1	409112	110	268.875
pSyn_Nrg1CtNrg3_pSyn_Gfp	DN416	2	457496	119	260.112
pSyn_Nrg1CtNrg3_pSyn_Gfp	DN416	3	414312	109	263.087
pSyn_Nrg1CtNrg3_pSyn_Gfp	DN416	4	406622	98	241.01
pSyn_Nrg1CtNrg3_pSyn_Gfp	DN417	1	388378	105	270.356
pSyn_Nrg1CtNrg3_pSyn_Gfp	DN417	2	403987	92	227.73
pSyn_Nrg1CtNrg3_pSyn_Gfp	DN417	3	386774	101	261.134
pSyn_Nrg1CtNrg3_pSyn_Gfp	DN430	1	406023	102	251.217
pSyn_Nrg1CtNrg3_pSyn_Gfp	DN430	2	416257	113	271.467
pSyn_Nrg1CtNrg3_pSyn_Gfp	DN430	3	421400	99	234.931
pSyn_Nrg3CtNrg1_pSyn_Gfp	DN406	1	386748	121	312.865
pSyn_Nrg3CtNrg1_pSyn_Gfp	DN406	2	397623	105	264.069
pSyn_Nrg3CtNrg1_pSyn_Gfp	DN406	3	396108	92	232.26
pSyn_Nrg3CtNrg1_pSyn_Gfp	DN406	4	364406	93	255.21
pSyn_Nrg3CtNrg1_pSyn_Gfp	DN437	1	371263	96	258.577
pSyn_Nrg3CtNrg1_pSyn_Gfp	DN437	2	416750	99	237.553
pSyn_Nrg3CtNrg1_pSyn_Gfp	DN437	3	398053	100	251.223
pSyn_Nrg3CtNrg1_pSyn_Gfp	DN436	1	336827	88	261.261
pSyn_Nrg3CtNrg1_pSyn_Gfp	DN436	2	387725	89	229.544
pSyn_Nrg3CtNrg1_pSyn_Gfp	DN436	3	358704	94	262.054
pSyn_Nrg3CtNrg1_pSyn_Gfp	DN438	1	442938	108	243.827
pSyn_Nrg3CtNrg1_pSyn_Gfp	DN438	2	373204	102	273.309
pSyn_Nrg3CtNrg1_pSyn_Gfp	DN438	3	394626	99	250.87
pSyn_Nrg3CtNrg1_pSyn_Gfp	DN449	1	419705	103	245.41
pSyn_Nrg3CtNrg1_pSyn_Gfp	DN449	2	436859	131	299.868
pSyn_Nrg3CtNrg1_pSyn_Gfp	DN449	3	414021	106	256.025
pSyn_Nrg3CtNrg1_pSyn_Gfp	DN449	4	418865	104	248.29
pSyn_Nrg3CtNrg1_pSyn_Gfp	DN419	1	429742	102	237.352
pSyn_Nrg3CtNrg1_pSyn_Gfp	DN419	2	346659	99	285.583
pSyn_Nrg3CtNrg1_pSyn_Gfp	DN419	3	418030	110	263.139
pSyn_Nrg3CtNrg1_pSyn_Gfp	DN419	4	387505	87	224.513
pSyn_Nrg3CtNrg1_pSyn_Gfp	DN439	1	424550	106	249.676
pSyn_Nrg3CtNrg1_pSyn_Gfp	DN439	2	410802	108	262.901
pSyn_Nrg3CtNrg1_pSyn_Gfp	DN439	3	440619	101	229.223
pSyn_Nrg1EGFNrg3_pSyn_Gfp	DN356	1	406216	103	253.56
pSyn_Nrg1EGFNrg3_pSyn_Gfp	DN356	2	426605	111	260.194
pSyn_Nrg1EGFNrg3_pSyn_Gfp	DN356	3	415142	112	269.787
pSyn_Nrg1EGFNrg3_pSyn_Gfp	DN370	1	467127	120	256.889
pSyn_Nrg1EGFNrg3_pSyn_Gfp	DN370	2	395900	118	298.055
pSyn_Nrg1EGFNrg3_pSyn_Gfp	DN370	3	434615	117	269.203
pSyn_Nrg1EGFNrg3_pSyn_Gfp	DN370	4	465662	115	246.96
pSyn_Nrg1EGFNrg3_pSyn_Gfp	DN372	1	459217	116	252.604
pSyn_Nrg1EGFNrg3_pSyn_Gfp	DN372	2	462636	119	257.222
pSyn_Nrg1EGFNrg3_pSyn_Gfp	DN372	3	374321	89	237.764
pSyn_Nrg1EGFNrg3_pSyn_Gfp	DN372	4	443695	111	250.172
pSyn_Nrg1EGFNrg3_pSyn_Gfp	DN379	1	418076	105	251.151
pSyn_Nrg1EGFNrg3_pSyn_Gfp	DN379	2	439571	104	236.594
pSyn_Nrg1EGFNrg3_pSyn_Gfp	DN379	3	353139	96	271.847
pSyn_Nrg1EGFNrg3_pSyn_Gfp	DN379	4	400621	107	267.085
pSyn_Nrg1EGFNrg3_pSyn_Gfp	DN385	1	444236	105	236.361
pSyn_Nrg1EGFNrg3_pSyn_Gfp	DN385	2	486341	128	263.19
pSyn_Nrg1EGFNrg3_pSyn_Gfp	DN385	3	519626	127	244.407
pSyn_Nrg1EGFNrg3_pSyn_Gfp	DN387	1	348922	95	272.267
pSyn_Nrg1EGFNrg3_pSyn_Gfp	DN387	2	399897	100	250.064
pSyn_Nrg1EGFNrg3_pSyn_Gfp	DN387	3	380370	85	223.467
pSyn_Nrg1EGFNrg3_pSyn_Gfp	DN387	4	338992	87	256.644
pSyn_Nrg3EGFNrg1_pSyn_Gfp	DN349	1	456334	118	258.583
pSyn_Nrg3EGFNrg1_pSyn_Gfp	DN349	2	428600	108	251.983
pSyn_Nrg3EGFNrg1_pSyn_Gfp	DN349	3	385181	106	275.195
pSyn_Nrg3EGFNrg1_pSyn_Gfp	DN359	1	490429	115	234.489
pSyn_Nrg3EGFNrg1_pSyn_Gfp	DN359	2	460809	142	308.154
pSyn_Nrg3EGFNrg1_pSyn_Gfp	DN359	3	448635	111	247.417
pSyn_Nrg3EGFNrg1_pSyn_Gfp	DN359	4	400064	111	277.455
pSyn_Nrg3EGFNrg1_pSyn_Gfp	DN366	1	401986	117	291.055
pSyn_Nrg3EGFNrg1_pSyn_Gfp	DN366	2	520743	131	251.564
pSyn_Nrg3EGFNrg1_pSyn_Gfp	DN366	3	488098	109	223.316
pSyn_Nrg3EGFNrg1_pSyn_Gfp	DN366	4	447712	102	227.825
pSyn_Nrg3EGFNrg1_pSyn_Gfp	DN374	1	445506	113	253.644
pSyn_Nrg3EGFNrg1_pSyn_Gfp	DN374	2	436492	115	263.464
pSyn_Nrg3EGFNrg1_pSyn_Gfp	DN374	3	388654	100	257.299
pSyn_Nrg3EGFNrg1_pSyn_Gfp	DN374	4	426785	107	250.711
pSyn_Nrg3EGFNrg1_pSyn_Gfp	DN375	1	432716	100	231.099
pSyn_Nrg3EGFNrg1_pSyn_Gfp	DN375	2	414539	101	243.644
pSyn_Nrg3EGFNrg1_pSyn_Gfp	DN375	3	390055	105	269.193
pSyn_Nrg3EGFNrg1_pSyn_Gfp	DN375	4	439000	114	259.681
pSyn_Nrg3EGFNrg1_pSyn_Gfp	DN380	1	351772	90	255.847
pSyn_Nrg3EGFNrg1_pSyn_Gfp	DN380	2	408333	103	252.245
pSyn_Nrg3EGFNrg1_pSyn_Gfp	DN380	3	380554	91	239.125
