# Supplementary material for: Subcellular sorting of neuregulins controls the assembly of excitatory-inhibitory cortical circuits
Source: eLife. 2020 Dec 15;9:e57000. doi: 10.7554/eLife.57000 (PMC7755390; doi:10.7554/eLife.57000)
Supplement: Figure 2—figure supplement 2—source data 1. [file elife-57000-fig2-figsupp2-data1.xlsx]

## Sheet: Proportion_cb1r_gad65
Plasmid	Brain	Cell	Count_gad65	Count_cb1r	Count_cb1r_gad65	Proportion_cb1r_gad65	Area_field
pSyn_Gfp	DN232	1	770	273	158	0.578755	2792.07
pSyn_Gfp	DN232	2	824	340	180	0.529412	2792.07
pSyn_Gfp	DN232	3	774	239	149	0.623431	2792.07
pSyn_Gfp	DN232	4	764	237	118	0.49789	2792.07
pSyn_Gfp	DN232	5	809	247	169	0.684211	2792.07
pSyn_Gfp	DN232	6	755	292	174	0.59589	2792.07
pSyn_Gfp	DN232	7	774	208	141	0.677885	2792.07
pSyn_Gfp	DN232	8	785	225	144	0.64	2792.07
pSyn_Gfp	DN232	9	761	230	153	0.665217	2792.07
pSyn_Gfp	DN232	10	839	332	180	0.542169	2792.07
pSyn_Gfp	DN234	1	805	252	173	0.686508	2792.07
pSyn_Gfp	DN234	2	941	291	205	0.704467	2792.07
pSyn_Gfp	DN234	3	745	284	172	0.605634	2792.07
pSyn_Gfp	DN234	4	852	262	160	0.610687	2792.07
pSyn_Gfp	DN234	5	833	195	114	0.584615	2792.07
pSyn_Gfp	DN234	6	824	246	142	0.577236	2792.07
pSyn_Gfp	DN234	7	756	194	144	0.742268	2792.07
pSyn_Gfp	DN234	8	781	205	131	0.639024	2792.07
pSyn_Gfp	DN234	9	852	270	176	0.651852	2792.07
pSyn_Gfp	DN234	10	873	254	133	0.523622	2792.07
pSyn_Nrg1_pSyn_Gfp	DN240	1	855	313	177	0.565495	2792.07
pSyn_Nrg1_pSyn_Gfp	DN240	2	850	299	175	0.585284	2792.07
pSyn_Nrg1_pSyn_Gfp	DN240	3	855	303	189	0.623762	2792.07
pSyn_Nrg1_pSyn_Gfp	DN240	4	856	269	163	0.605948	2792.07
pSyn_Nrg1_pSyn_Gfp	DN240	5	828	282	169	0.599291	2792.07
pSyn_Nrg1_pSyn_Gfp	DN240	6	824	296	199	0.672297	2792.07
pSyn_Nrg1_pSyn_Gfp	DN240	7	865	312	146	0.467949	2792.07
pSyn_Nrg1_pSyn_Gfp	DN240	8	738	242	159	0.657025	2792.07
pSyn_Nrg1_pSyn_Gfp	DN240	9	831	218	152	0.697248	2792.07
pSyn_Nrg1_pSyn_Gfp	DN240	10	796	254	139	0.547244	2792.07
pSyn_Nrg1_pSyn_Gfp	DN243	1	869	295	186	0.630508	2792.07
pSyn_Nrg1_pSyn_Gfp	DN243	2	885	361	187	0.518006	2792.07
pSyn_Nrg1_pSyn_Gfp	DN243	3	882	310	185	0.596774	2792.07
pSyn_Nrg1_pSyn_Gfp	DN243	4	810	352	199	0.565341	2792.07
pSyn_Nrg1_pSyn_Gfp	DN243	5	810	328	159	0.484756	2792.07
pSyn_Nrg1_pSyn_Gfp	DN243	6	915	329	194	0.589666	2792.07
pSyn_Nrg1_pSyn_Gfp	DN243	7	818	307	182	0.592834	2792.07
pSyn_Nrg1_pSyn_Gfp	DN243	8	859	301	149	0.495017	2792.07
pSyn_Nrg1_pSyn_Gfp	DN243	9	893	301	178	0.591362	2792.07
pSyn_Nrg1_pSyn_Gfp	DN243	10	878	305	164	0.537705	2792.07
pSyn_Nrg1_pSyn_Gfp	DN241	1	861	353	177	0.501416	2792.07
pSyn_Nrg1_pSyn_Gfp	DN241	2	788	248	132	0.532258	2792.07
pSyn_Nrg1_pSyn_Gfp	DN241	3	851	266	165	0.620301	2792.07
pSyn_Nrg1_pSyn_Gfp	DN241	4	841	266	168	0.631579	2792.07
pSyn_Nrg1_pSyn_Gfp	DN241	5	794	252	155	0.615079	2792.07
pSyn_Nrg1_pSyn_Gfp	DN241	6	843	285	189	0.663158	2792.07
pSyn_Nrg1_pSyn_Gfp	DN241	7	809	216	143	0.662037	2792.07
pSyn_Nrg1_pSyn_Gfp	DN241	8	764	246	152	0.617886	2792.07
pSyn_Nrg1_pSyn_Gfp	DN241	9	724	240	154	0.641667	2792.07
pSyn_Nrg1_pSyn_Gfp	DN241	10	754	201	131	0.651741	2792.07
pSyn_Nrg1_pSyn_Gfp	DN219	1	813	332	210	0.63253	2792.07
pSyn_Nrg1_pSyn_Gfp	DN219	2	811	306	219	0.715686	2792.07
pSyn_Nrg1_pSyn_Gfp	DN219	3	907	297	196	0.659933	2792.07
pSyn_Nrg1_pSyn_Gfp	DN219	4	839	335	180	0.537313	2792.07
pSyn_Nrg1_pSyn_Gfp	DN219	5	879	340	211	0.620588	2792.07
pSyn_Nrg1_pSyn_Gfp	DN219	6	883	309	185	0.598706	2792.07
pSyn_Nrg1_pSyn_Gfp	DN219	7	788	250	186	0.744	2792.07
pSyn_Nrg1_pSyn_Gfp	DN219	8	880	263	173	0.657795	2792.07
pSyn_Nrg1_pSyn_Gfp	DN219	9	840	292	187	0.640411	2792.07
pSyn_Nrg1_pSyn_Gfp	DN219	10	838	275	164	0.596364	2792.07
pSyn_Gfp	CO55	1	902	298	204	0.684564	2792.07
pSyn_Gfp	CO55	2	862	303	224	0.739274	2792.07
pSyn_Gfp	CO55	3	891	324	191	0.589506	2792.07
pSyn_Gfp	CO55	4	910	311	189	0.607717	2792.07
pSyn_Gfp	CO55	5	790	306	150	0.490196	2792.07
pSyn_Gfp	CO55	6	759	297	163	0.548822	2792.07
pSyn_Gfp	CO55	7	930	350	171	0.488571	2792.07
pSyn_Gfp	CO55	8	820	298	183	0.614094	2792.07
pSyn_Gfp	CO55	9	702	297	193	0.649832	2792.07
pSyn_Gfp	CO55	10	826	284	176	0.619718	2792.07
pSyn_Gfp	CO53	1	813	314	190	0.605096	2792.07
pSyn_Gfp	CO53	2	826	299	202	0.675585	2792.07
pSyn_Gfp	CO53	3	777	308	188	0.61039	2792.07
pSyn_Gfp	CO53	4	783	303	167	0.551155	2792.07
pSyn_Gfp	CO53	5	811	328	192	0.585366	2792.07
pSyn_Gfp	CO53	6	834	272	187	0.6875	2792.07
pSyn_Gfp	CO53	7	772	323	195	0.603715	2792.07
pSyn_Gfp	CO53	8	820	347	202	0.582133	2792.07
pSyn_Gfp	CO53	9	785	267	185	0.692884	2792.07
pSyn_Gfp	CO53	10	806	277	171	0.617329	2792.07
pSyn_Nrg3_pSyn_Gfp	CO30	1	899	366	185	0.505464	2792.07
pSyn_Nrg3_pSyn_Gfp	CO30	2	790	299	164	0.548495	2792.07
pSyn_Nrg3_pSyn_Gfp	CO30	3	867	346	180	0.520231	2792.07
pSyn_Nrg3_pSyn_Gfp	CO30	4	817	297	177	0.59596	2792.07
pSyn_Nrg3_pSyn_Gfp	CO30	5	811	328	165	0.503049	2792.07
pSyn_Nrg3_pSyn_Gfp	CO30	6	810	403	215	0.533499	2792.07
pSyn_Nrg3_pSyn_Gfp	CO30	7	791	273	172	0.630037	2792.07
pSyn_Nrg3_pSyn_Gfp	CO30	8	811	350	215	0.614286	2792.07
pSyn_Nrg3_pSyn_Gfp	CO30	9	833	292	166	0.568493	2792.07
pSyn_Nrg3_pSyn_Gfp	CO30	10	831	336	204	0.607143	2792.07
pSyn_Nrg3_pSyn_Gfp	CO28	1	797	291	194	0.666667	2792.07
pSyn_Nrg3_pSyn_Gfp	CO28	2	874	313	194	0.619808	2792.07
pSyn_Nrg3_pSyn_Gfp	CO28	3	815	271	156	0.575646	2792.07
pSyn_Nrg3_pSyn_Gfp	CO28	4	829	272	179	0.658088	2792.07
pSyn_Nrg3_pSyn_Gfp	CO28	5	916	309	160	0.517799	2792.07
pSyn_Nrg3_pSyn_Gfp	CO28	6	842	322	194	0.602484	2792.07
pSyn_Nrg3_pSyn_Gfp	CO28	7	872	280	191	0.682143	2792.07
pSyn_Nrg3_pSyn_Gfp	CO28	8	808	254	166	0.653543	2792.07
pSyn_Nrg3_pSyn_Gfp	CO28	9	829	293	158	0.539249	2792.07
pSyn_Nrg3_pSyn_Gfp	CO28	10	905	315	171	0.542857	2792.07
pSyn_Nrg3_pSyn_Gfp	CO25	1	825	282	178	0.631206	2792.07
pSyn_Nrg3_pSyn_Gfp	CO25	2	845	307	165	0.537459	2792.07
pSyn_Nrg3_pSyn_Gfp	CO25	3	826	300	154	0.513333	2792.07
pSyn_Nrg3_pSyn_Gfp	CO25	4	874	276	152	0.550725	2792.07
pSyn_Nrg3_pSyn_Gfp	CO25	5	774	261	174	0.666667	2792.07
pSyn_Nrg3_pSyn_Gfp	CO25	6	781	272	163	0.599265	2792.07
pSyn_Nrg3_pSyn_Gfp	CO25	7	760	232	164	0.706897	2792.07
pSyn_Nrg3_pSyn_Gfp	CO25	8	824	270	152	0.562963	2792.07
pSyn_Nrg3_pSyn_Gfp	CO25	9	745	294	186	0.632653	2792.07
pSyn_Nrg3_pSyn_Gfp	CO25	10	767	284	153	0.538732	2792.07
pSyn_Nrg3_pSyn_Gfp	CO29	1	862	322	168	0.521739	2792.07
pSyn_Nrg3_pSyn_Gfp	CO29	2	847	229	162	0.707424	2792.07
pSyn_Nrg3_pSyn_Gfp	CO29	3	894	293	180	0.614334	2792.07
pSyn_Nrg3_pSyn_Gfp	CO29	4	879	314	196	0.624204	2792.07
pSyn_Nrg3_pSyn_Gfp	CO29	5	847	290	192	0.662069	2792.07
pSyn_Nrg3_pSyn_Gfp	CO29	6	863	294	175	0.595238	2792.07
pSyn_Nrg3_pSyn_Gfp	CO29	7	865	321	189	0.588785	2792.07
pSyn_Nrg3_pSyn_Gfp	CO29	8	781	251	157	0.625498	2792.07
pSyn_Nrg3_pSyn_Gfp	CO29	9	766	296	185	0.625	2792.07
pSyn_Nrg3_pSyn_Gfp	CO29	10	835	288	149	0.517361	2792.07

## Sheet: Proportion_vglut1_psd95
Plasmid	Brain	Cell	Count_vglut1	Count_psd95	Count_vglut1_psd95	Proportion_vglut1_psd95	Area_field
pSyn_Gfp	DN232	1	836	1555	557	0.666268	2792.07
pSyn_Gfp	DN232	2	892	1233	565	0.633408	2792.07
pSyn_Gfp	DN232	3	1014	1492	529	0.521696	2792.07
pSyn_Gfp	DN232	4	831	1467	737	0.886883	2792.07
pSyn_Gfp	DN232	5	967	1699	597	0.617373	2792.07
pSyn_Gfp	DN232	6	986	1537	644	0.653144	2792.07
pSyn_Gfp	DN232	7	886	1491	691	0.77991	2792.07
pSyn_Gfp	DN232	8	871	1370	458	0.525832	2792.07
pSyn_Gfp	DN232	9	978	1443	530	0.541922	2792.07
pSyn_Gfp	DN232	10	887	1623	702	0.791432	2792.07
pSyn_Gfp	DN234	1	929	1456	597	0.642626	2792.07
pSyn_Gfp	DN234	2	964	1579	648	0.672199	2792.07
pSyn_Gfp	DN234	3	863	1413	771	0.893395	2792.07
pSyn_Gfp	DN234	4	893	1501	486	0.544233	2792.07
pSyn_Gfp	DN234	5	932	1289	434	0.465665	2792.07
pSyn_Gfp	DN234	6	883	1226	358	0.405436	2792.07
pSyn_Gfp	DN234	7	963	1449	476	0.494289	2792.07
pSyn_Gfp	DN234	8	927	1523	684	0.737864	2792.07
pSyn_Gfp	DN234	9	880	1159	405	0.460227	2792.07
pSyn_Gfp	DN234	10	931	1555	582	0.625134	2792.07
pSyn_Nrg1_pSyn_Gfp	DN240	1	973	1690	653	0.67112	2792.07
pSyn_Nrg1_pSyn_Gfp	DN240	2	971	1682	623	0.641607	2792.07
pSyn_Nrg1_pSyn_Gfp	DN240	3	854	1139	447	0.523419	2792.07
pSyn_Nrg1_pSyn_Gfp	DN240	4	914	1454	684	0.748359	2792.07
pSyn_Nrg1_pSyn_Gfp	DN240	5	934	1527	552	0.591006	2792.07
pSyn_Nrg1_pSyn_Gfp	DN240	6	924	1320	400	0.4329	2792.07
pSyn_Nrg1_pSyn_Gfp	DN240	7	890	1361	425	0.477528	2792.07
pSyn_Nrg1_pSyn_Gfp	DN240	8	982	1810	612	0.623218	2792.07
pSyn_Nrg1_pSyn_Gfp	DN240	9	965	1480	420	0.435233	2792.07
pSyn_Nrg1_pSyn_Gfp	DN240	10	986	1393	442	0.448276	2792.07
pSyn_Nrg1_pSyn_Gfp	DN243	1	892	1605	687	0.770179	2792.07
pSyn_Nrg1_pSyn_Gfp	DN243	2	885	1650	710	0.80226	2792.07
pSyn_Nrg1_pSyn_Gfp	DN243	3	873	1328	453	0.5189	2792.07
pSyn_Nrg1_pSyn_Gfp	DN243	4	972	1628	532	0.547325	2792.07
pSyn_Nrg1_pSyn_Gfp	DN243	5	974	1656	649	0.666324	2792.07
pSyn_Nrg1_pSyn_Gfp	DN243	6	845	1544	701	0.829586	2792.07
pSyn_Nrg1_pSyn_Gfp	DN243	7	920	1626	635	0.690217	2792.07
pSyn_Nrg1_pSyn_Gfp	DN243	8	881	1576	727	0.825199	2792.07
pSyn_Nrg1_pSyn_Gfp	DN243	9	892	1452	479	0.536996	2792.07
pSyn_Nrg1_pSyn_Gfp	DN243	10	884	1399	455	0.514706	2792.07
pSyn_Nrg1_pSyn_Gfp	DN241	1	972	1599	515	0.529835	2792.07
pSyn_Nrg1_pSyn_Gfp	DN241	2	919	1543	628	0.683351	2792.07
pSyn_Nrg1_pSyn_Gfp	DN241	3	843	1340	530	0.628707	2792.07
pSyn_Nrg1_pSyn_Gfp	DN241	4	927	1644	501	0.540453	2792.07
pSyn_Nrg1_pSyn_Gfp	DN241	5	944	1500	662	0.701271	2792.07
pSyn_Nrg1_pSyn_Gfp	DN241	6	969	1538	651	0.671827	2792.07
pSyn_Nrg1_pSyn_Gfp	DN241	7	1002	1472	623	0.621756	2792.07
pSyn_Nrg1_pSyn_Gfp	DN241	8	834	1303	665	0.797362	2792.07
pSyn_Nrg1_pSyn_Gfp	DN241	9	1027	1369	462	0.449854	2792.07
pSyn_Nrg1_pSyn_Gfp	DN241	10	947	1481	431	0.455121	2792.07
pSyn_Nrg1_pSyn_Gfp	DN235	1	946	1517	599	0.633192	2792.07
pSyn_Nrg1_pSyn_Gfp	DN235	2	1000	1625	620	0.62	2792.07
pSyn_Nrg1_pSyn_Gfp	DN235	3	938	1520	590	0.628998	2792.07
pSyn_Nrg1_pSyn_Gfp	DN235	4	947	1572	532	0.561774	2792.07
pSyn_Nrg1_pSyn_Gfp	DN235	5	947	1320	494	0.521647	2792.07
pSyn_Nrg1_pSyn_Gfp	DN235	6	1113	1546	569	0.511231	2792.07
pSyn_Nrg1_pSyn_Gfp	DN235	7	951	1554	593	0.623554	2792.07
pSyn_Nrg1_pSyn_Gfp	DN235	8	952	1555	537	0.564076	2792.07
pSyn_Nrg1_pSyn_Gfp	DN235	9	958	1329	445	0.464509	2792.07
pSyn_Nrg1_pSyn_Gfp	DN235	10	896	1267	362	0.404018	2792.07
pSyn_Gfp	CO53	1	886	1554	628	0.708804	2792.07
pSyn_Gfp	CO53	2	988	1524	630	0.637652	2792.07
pSyn_Gfp	CO53	3	933	1506	644	0.690247	2792.07
pSyn_Gfp	CO53	4	916	1572	641	0.699782	2792.07
pSyn_Gfp	CO53	5	893	1156	399	0.446809	2792.07
pSyn_Gfp	CO53	6	945	1245	456	0.48254	2792.07
pSyn_Gfp	CO53	7	969	1408	410	0.423117	2792.07
pSyn_Gfp	CO53	8	906	1540	651	0.718543	2792.07
pSyn_Gfp	CO53	9	1025	1690	610	0.595122	2792.07
pSyn_Gfp	CO53	10	963	1608	493	0.511942	2792.07
pSyn_Gfp	CO54	1	956	1774	603	0.630753	2792.07
pSyn_Gfp	CO54	2	1039	1800	631	0.607315	2792.07
pSyn_Gfp	CO54	3	1009	1510	429	0.425173	2792.07
pSyn_Gfp	CO54	4	1082	1705	574	0.530499	2792.07
pSyn_Gfp	CO54	5	908	1571	713	0.785242	2792.07
pSyn_Gfp	CO54	6	1061	1670	470	0.442978	2792.07
pSyn_Gfp	CO54	7	963	1467	464	0.481828	2792.07
pSyn_Gfp	CO54	8	957	1584	511	0.53396	2792.07
pSyn_Gfp	CO54	9	932	1451	496	0.532189	2792.07
pSyn_Gfp	CO54	10	956	1525	655	0.685146	2792.07
pSyn_Nrg3_pSyn_Gfp	CO30	1	992	1784	579	0.583669	2792.07
pSyn_Nrg3_pSyn_Gfp	CO30	2	1051	1766	627	0.596575	2792.07
pSyn_Nrg3_pSyn_Gfp	CO30	3	914	1523	612	0.669584	2792.07
pSyn_Nrg3_pSyn_Gfp	CO30	4	888	1598	674	0.759009	2792.07
pSyn_Nrg3_pSyn_Gfp	CO30	5	940	1701	681	0.724468	2792.07
pSyn_Nrg3_pSyn_Gfp	CO30	6	898	1574	715	0.796214	2792.07
pSyn_Nrg3_pSyn_Gfp	CO30	7	790	1460	653	0.826582	2792.07
pSyn_Nrg3_pSyn_Gfp	CO30	8	849	1395	578	0.680801	2792.07
pSyn_Nrg3_pSyn_Gfp	CO30	9	839	1399	460	0.548272	2792.07
pSyn_Nrg3_pSyn_Gfp	CO30	10	773	1432	602	0.778784	2792.07
pSyn_Nrg3_pSyn_Gfp	CO28	1	852	1538	727	0.853286	2792.07
pSyn_Nrg3_pSyn_Gfp	CO28	2	894	1673	731	0.817673	2792.07
pSyn_Nrg3_pSyn_Gfp	CO28	3	856	1344	414	0.483645	2792.07
pSyn_Nrg3_pSyn_Gfp	CO28	4	788	1278	638	0.809645	2792.07
pSyn_Nrg3_pSyn_Gfp	CO28	5	899	1384	469	0.521691	2792.07
pSyn_Nrg3_pSyn_Gfp	CO28	6	928	1697	712	0.767241	2792.07
pSyn_Nrg3_pSyn_Gfp	CO28	7	952	1401	579	0.608193	2792.07
pSyn_Nrg3_pSyn_Gfp	CO28	8	921	1532	558	0.605863	2792.07
pSyn_Nrg3_pSyn_Gfp	CO28	9	996	1651	560	0.562249	2792.07
pSyn_Nrg3_pSyn_Gfp	CO28	10	986	1421	538	0.545639	2792.07
pSyn_Nrg3_pSyn_Gfp	CO29	1	752	1396	660	0.87766	2792.07
pSyn_Nrg3_pSyn_Gfp	CO29	2	898	1522	573	0.638085	2792.07
pSyn_Nrg3_pSyn_Gfp	CO29	3	924	1571	636	0.688312	2792.07
pSyn_Nrg3_pSyn_Gfp	CO29	4	984	1815	594	0.603659	2792.07
pSyn_Nrg3_pSyn_Gfp	CO29	5	931	1602	526	0.564984	2792.07
pSyn_Nrg3_pSyn_Gfp	CO29	6	1053	1310	382	0.362773	2792.07
pSyn_Nrg3_pSyn_Gfp	CO29	7	938	1652	528	0.5629	2792.07
pSyn_Nrg3_pSyn_Gfp	CO29	8	918	1629	587	0.639434	2792.07
pSyn_Nrg3_pSyn_Gfp	CO29	9	990	1728	510	0.515152	2792.07
pSyn_Nrg3_pSyn_Gfp	CO29	10	962	1752	587	0.610187	2792.07
pSyn_Nrg3_pSyn_Gfp	CO25	1	880	1466	515	0.585227	2792.07
pSyn_Nrg3_pSyn_Gfp	CO25	2	1003	1543	594	0.592223	2792.07
pSyn_Nrg3_pSyn_Gfp	CO25	3	888	1530	647	0.728604	2792.07
pSyn_Nrg3_pSyn_Gfp	CO25	4	941	1601	623	0.662062	2792.07
pSyn_Nrg3_pSyn_Gfp	CO25	5	773	1398	630	0.815006	2792.07
pSyn_Nrg3_pSyn_Gfp	CO25	6	797	1191	489	0.613551	2792.07
pSyn_Nrg3_pSyn_Gfp	CO25	7	885	1366	457	0.516384	2792.07
pSyn_Nrg3_pSyn_Gfp	CO25	8	917	1217	329	0.358779	2792.07
pSyn_Nrg3_pSyn_Gfp	CO25	9	907	1552	586	0.646086	2792.07
pSyn_Nrg3_pSyn_Gfp	CO25	10	851	1446	599	0.703878	2792.07
