# Supplementary material for: Subcellular sorting of neuregulins controls the assembly of excitatory-inhibitory cortical circuits
Source: eLife. 2020 Dec 15;9:e57000. doi: 10.7554/eLife.57000 (PMC7755390; doi:10.7554/eLife.57000)
Supplement: Figure 2—source data 1. [file elife-57000-fig2-data1.xlsx]

## Sheet: Inhibitory_synapses
Plasmid	Brain	Cell	Count_gad65_cb1r	Perimeter_cell	Density_gad65_cb1r
pSyn_Gfp	DN234	1	9	37.79	0.238158
pSyn_Gfp	DN234	2	4	33.695	0.118712
pSyn_Gfp	DN234	3	2	42.531	0.0470245
pSyn_Gfp	DN234	4	3	42.28	0.0709555
pSyn_Gfp	DN234	5	3	51.997	0.0576956
pSyn_Gfp	DN234	6	7	42.957	0.162954
pSyn_Gfp	DN234	7	4	41.834	0.095616
pSyn_Gfp	DN234	8	4	36.088	0.11084
pSyn_Gfp	DN234	9	7	38.642	0.18115
pSyn_Gfp	DN234	10	4	33.62	0.118977
pSyn_Gfp	DN234	11	1	36.489	0.0274055
pSyn_Gfp	DN234	12	2	47.363	0.0422271
pSyn_Gfp	DN234	13	2	52.589	0.0380308
pSyn_Gfp	DN234	14	6	48.154	0.1246
pSyn_Gfp	DN234	15	5	41.504	0.12047
pSyn_Gfp	DN234	16	4	45.935	0.0870796
pSyn_Gfp	DN234	17	5	45.053	0.11098
pSyn_Gfp	DN234	18	7	36.179	0.193482
pSyn_Gfp	DN234	19	2	42.802	0.0467268
pSyn_Gfp	DN232	1	9	55.754	0.161423
pSyn_Gfp	DN232	2	4	48.801	0.0819655
pSyn_Gfp	DN232	3	3	48.93	0.0613121
pSyn_Gfp	DN232	4	8	47.043	0.170057
pSyn_Gfp	DN232	5	1	47.376	0.0211077
pSyn_Gfp	DN232	6	5	51.093	0.0978608
pSyn_Gfp	DN232	7	4	42.719	0.0936352
pSyn_Gfp	DN232	8	3	39.227	0.0764779
pSyn_Gfp	DN232	9	3	53.034	0.0565675
pSyn_Gfp	DN232	10	5	49.058	0.10192
pSyn_Gfp	DN232	11	3	40.433	0.0741968
pSyn_Gfp	DN232	12	5	46.178	0.108277
pSyn_Gfp	DN233	1	5	44.216	0.113081
pSyn_Gfp	DN233	2	3	34.855	0.0860709
pSyn_Gfp	DN233	3	11	43.201	0.254624
pSyn_Gfp	DN233	4	9	51.164	0.175905
pSyn_Gfp	DN233	5	5	39.609	0.126234
pSyn_Gfp	DN233	6	7	37.451	0.186911
pSyn_Gfp	DN233	7	1	42.841	0.0233421
pSyn_Gfp	DN233	8	5	39.522	0.126512
pSyn_Gfp	DN233	9	11	48.662	0.226049
pSyn_Gfp	DN233	10	1	54.932	0.0182043
pSyn_Gfp	DN233	11	1	41.391	0.0241598
pSyn_Gfp	DN233	12	5	44.764	0.111697
pSyn_Gfp	DN233	13	3	48.193	0.0622497
pSyn_Gfp	DN233	14	1	46.407	0.0215485
pSyn_Nrg1_pSyn_Gfp	DN243	1	3	43.792	0.0685057
pSyn_Nrg1_pSyn_Gfp	DN243	2	8	41.733	0.191695
pSyn_Nrg1_pSyn_Gfp	DN243	3	6	43.007	0.139512
pSyn_Nrg1_pSyn_Gfp	DN243	4	5	46.775	0.106895
pSyn_Nrg1_pSyn_Gfp	DN243	5	6	37.347	0.160655
pSyn_Nrg1_pSyn_Gfp	DN243	6	14	47.701	0.293495
pSyn_Nrg1_pSyn_Gfp	DN243	7	4	45.98	0.0869943
pSyn_Nrg1_pSyn_Gfp	DN243	8	2	40.317	0.0496069
pSyn_Nrg1_pSyn_Gfp	DN243	9	5	52.841	0.0946235
pSyn_Nrg1_pSyn_Gfp	DN243	10	10	43.582	0.229453
pSyn_Nrg1_pSyn_Gfp	DN243	11	9	47.977	0.18759
pSyn_Nrg1_pSyn_Gfp	DN243	12	5	39.231	0.12745
pSyn_Nrg1_pSyn_Gfp	DN243	13	11	47.073	0.23368
pSyn_Nrg1_pSyn_Gfp	DN243	14	6	38.502	0.155836
pSyn_Nrg1_pSyn_Gfp	DN243	15	12	50.58	0.237248
pSyn_Nrg1_pSyn_Gfp	DN243	16	5	53.251	0.093895
pSyn_Nrg1_pSyn_Gfp	DN243	17	9	54.581	0.164893
pSyn_Nrg1_pSyn_Gfp	DN243	18	5	48.253	0.103621
pSyn_Nrg1_pSyn_Gfp	DN240	1	5	54.262	0.0921455
pSyn_Nrg1_pSyn_Gfp	DN240	2	9	38.651	0.232853
pSyn_Nrg1_pSyn_Gfp	DN240	3	9	46.689	0.192765
pSyn_Nrg1_pSyn_Gfp	DN240	4	6	38.601	0.155436
pSyn_Nrg1_pSyn_Gfp	DN240	5	12	46.606	0.257478
pSyn_Nrg1_pSyn_Gfp	DN240	6	7	50.462	0.138718
pSyn_Nrg1_pSyn_Gfp	DN240	7	3	42.879	0.0699643
pSyn_Nrg1_pSyn_Gfp	DN240	8	6	40.803	0.147048
pSyn_Nrg1_pSyn_Gfp	DN240	9	6	45.556	0.131706
pSyn_Nrg1_pSyn_Gfp	DN240	10	6	47.96	0.125104
pSyn_Nrg1_pSyn_Gfp	DN240	11	3	42.496	0.0705949
pSyn_Nrg1_pSyn_Gfp	DN240	12	8	48.265	0.165752
pSyn_Nrg1_pSyn_Gfp	DN240	13	7	43.496	0.160934
pSyn_Nrg1_pSyn_Gfp	DN240	14	7	50.496	0.138625
pSyn_Nrg1_pSyn_Gfp	DN240	15	2	50.396	0.0396857
pSyn_Nrg1_pSyn_Gfp	DN240	16	6	42.36	0.141643
pSyn_Nrg1_pSyn_Gfp	DN241	1	9	44.633	0.201645
pSyn_Nrg1_pSyn_Gfp	DN241	2	5	32.701	0.152901
pSyn_Nrg1_pSyn_Gfp	DN241	3	5	53.951	0.0926767
pSyn_Nrg1_pSyn_Gfp	DN241	4	8	43.62	0.183402
pSyn_Nrg1_pSyn_Gfp	DN241	5	5	45.509	0.109868
pSyn_Nrg1_pSyn_Gfp	DN241	6	7	46.918	0.149196
pSyn_Nrg1_pSyn_Gfp	DN241	7	6	40.086	0.149678
pSyn_Nrg1_pSyn_Gfp	DN219	1	6	39.813	0.150705
pSyn_Nrg1_pSyn_Gfp	DN219	2	4	35.943	0.111287
pSyn_Nrg1_pSyn_Gfp	DN219	3	11	42.265	0.260263
pSyn_Nrg1_pSyn_Gfp	DN219	4	7	43.815	0.159763
pSyn_Nrg1_pSyn_Gfp	DN219	5	14	44.661	0.313473
pSyn_Nrg1_pSyn_Gfp	DN219	6	10	42.865	0.233291
pSyn_Nrg1_pSyn_Gfp	DN219	7	7	32.044	0.21845
pSyn_Nrg1_pSyn_Gfp	DN219	8	4	46.656	0.0857339
pSyn_Nrg1_pSyn_Gfp	DN219	9	9	42.429	0.212119
pSyn_Nrg1_pSyn_Gfp	DN219	10	3	46.299	0.0647962
pSyn_Nrg1_pSyn_Gfp	DN219	11	7	37.285	0.187743
pSyn_Nrg1_pSyn_Gfp	DN219	12	7	42.627	0.164215
pSyn_Nrg1_pSyn_Gfp	DN219	13	5	38.952	0.128363
pSyn_Nrg1_pSyn_Gfp	DN219	14	10	37.996	0.263186
pSyn_Nrg1_pSyn_Gfp	DN219	15	6	46.43	0.129227
pSyn_Nrg1_pSyn_Gfp	DN219	16	9	41.242	0.218224
pSyn_Nrg1_pSyn_Gfp	DN219	17	6	38.272	0.156773
pSyn_Nrg1_pSyn_Gfp	DN219	18	5	33.799	0.147933
pSyn_Nrg1_pSyn_Gfp	DN219	19	5	39.792	0.125653
pSyn_Nrg1_pSyn_Gfp	DN219	20	8	40.969	0.19527
pSyn_Gfp	CO55	1	7	46.667	0.149999
pSyn_Gfp	CO55	2	5	35.754	0.139844
pSyn_Gfp	CO55	3	8	39.666	0.201684
pSyn_Gfp	CO55	4	8	41.7	0.191847
pSyn_Gfp	CO55	5	5	41.054	0.121791
pSyn_Gfp	CO55	6	4	43.498	0.0919583
pSyn_Gfp	CO55	7	5	45.246	0.110507
pSyn_Gfp	CO55	8	4	40.204	0.0994926
pSyn_Gfp	CO55	9	6	42.842	0.140049
pSyn_Gfp	CO55	10	1	31.617	0.0316286
pSyn_Gfp	CO55	11	5	33.731	0.148232
pSyn_Gfp	CO55	12	11	39.754	0.276702
pSyn_Gfp	CO55	13	1	33.562	0.0297956
pSyn_Gfp	CO55	14	8	36.184	0.221092
pSyn_Gfp	CO55	15	1	36.129	0.0276786
pSyn_Gfp	CO53	1	4	45.973	0.0870076
pSyn_Gfp	CO53	2	8	44.635	0.179232
pSyn_Gfp	CO53	3	3	43.496	0.0689719
pSyn_Gfp	CO53	4	3	45.846	0.0654365
pSyn_Gfp	CO53	5	5	51.059	0.0979259
pSyn_Gfp	CO53	6	13	40.941	0.31753
pSyn_Gfp	CO53	7	6	46.844	0.128085
pSyn_Gfp	CO53	8	8	46.218	0.173093
pSyn_Gfp	CO53	9	6	47.83	0.125444
pSyn_Gfp	CO53	10	4	38.54	0.103788
pSyn_Gfp	CO53	11	5	45.343	0.110271
pSyn_Gfp	CO53	12	6	47.639	0.125947
pSyn_Gfp	CO53	13	4	37.297	0.107247
pSyn_Gfp	CO53	14	4	46.876	0.0853315
pSyn_Gfp	CO53	15	12	57.008	0.210497
pSyn_Gfp	CO53	16	6	42.273	0.141935
pSyn_Gfp	CO53	17	2	50.081	0.0399353
pSyn_Gfp	CO53	18	3	42.42	0.0707214
pSyn_Gfp	CO53	19	10	53.662	0.186352
pSyn_Gfp	CO53	20	5	48.525	0.10304
pSyn_Nrg3_pSyn_Gfp	CO30	1	9	40.717	0.221038
pSyn_Nrg3_pSyn_Gfp	CO30	2	6	45.126	0.132961
pSyn_Nrg3_pSyn_Gfp	CO30	3	9	46.594	0.193158
pSyn_Nrg3_pSyn_Gfp	CO30	4	3	41.703	0.0719373
pSyn_Nrg3_pSyn_Gfp	CO30	5	5	38.293	0.130572
pSyn_Nrg3_pSyn_Gfp	CO30	6	1	31.493	0.0317531
pSyn_Nrg3_pSyn_Gfp	CO30	7	9	57.402	0.156789
pSyn_Nrg3_pSyn_Gfp	CO30	8	7	43.123	0.162326
pSyn_Nrg3_pSyn_Gfp	CO30	9	2	44.598	0.0448451
pSyn_Nrg3_pSyn_Gfp	CO30	10	6	40.5	0.148148
pSyn_Nrg3_pSyn_Gfp	CO30	11	3	31.453	0.0953804
pSyn_Nrg3_pSyn_Gfp	CO30	12	3	47.871	0.0626684
pSyn_Nrg3_pSyn_Gfp	CO28	1	7	46.727	0.149806
pSyn_Nrg3_pSyn_Gfp	CO28	2	6	50.175	0.119581
pSyn_Nrg3_pSyn_Gfp	CO28	3	6	42.303	0.141834
pSyn_Nrg3_pSyn_Gfp	CO28	4	2	46.287	0.0432087
pSyn_Nrg3_pSyn_Gfp	CO28	5	1	48.864	0.020465
pSyn_Nrg3_pSyn_Gfp	CO28	6	4	29.937	0.133614
pSyn_Nrg3_pSyn_Gfp	CO28	7	7	50.419	0.138837
pSyn_Nrg3_pSyn_Gfp	CO28	8	2	33.095	0.0604321
pSyn_Nrg3_pSyn_Gfp	CO28	9	3	37.668	0.0796432
pSyn_Nrg3_pSyn_Gfp	CO28	10	4	40.797	0.0980464
pSyn_Nrg3_pSyn_Gfp	CO28	11	12	60.803	0.197359
pSyn_Nrg3_pSyn_Gfp	CO28	12	5	52.234	0.0957231
pSyn_Nrg3_pSyn_Gfp	CO28	13	7	54.8	0.127737
pSyn_Nrg3_pSyn_Gfp	CO28	14	3	49.868	0.0601588
pSyn_Nrg3_pSyn_Gfp	CO28	15	6	58.85	0.101954
pSyn_Nrg3_pSyn_Gfp	CO28	16	10	60.917	0.164158
pSyn_Nrg3_pSyn_Gfp	CO28	17	11	63.367	0.173592
pSyn_Nrg3_pSyn_Gfp	CO28	18	9	50.979	0.176543
pSyn_Nrg3_pSyn_Gfp	CO28	19	6	50.577	0.118631
pSyn_Nrg3_pSyn_Gfp	CO28	20	5	49.677	0.10065
pSyn_Nrg3_pSyn_Gfp	CO25	1	2	40.599	0.0492623
pSyn_Nrg3_pSyn_Gfp	CO25	2	7	47.7	0.146751
pSyn_Nrg3_pSyn_Gfp	CO25	3	10	54.178	0.184577
pSyn_Nrg3_pSyn_Gfp	CO25	4	6	42.736	0.140397
pSyn_Nrg3_pSyn_Gfp	CO25	5	3	45.221	0.0663409
pSyn_Nrg3_pSyn_Gfp	CO25	6	2	38.273	0.0522562
pSyn_Nrg3_pSyn_Gfp	CO25	7	3	49.644	0.0604303
pSyn_Nrg3_pSyn_Gfp	CO25	8	7	42.809	0.163517
pSyn_Nrg3_pSyn_Gfp	CO25	9	2	45.169	0.0442782
pSyn_Nrg3_pSyn_Gfp	CO25	10	7	58.142	0.120395
pSyn_Nrg3_pSyn_Gfp	CO25	11	4	45.273	0.0883529
pSyn_Nrg3_pSyn_Gfp	CO25	12	4	55.963	0.0714758
pSyn_Nrg3_pSyn_Gfp	CO25	13	4	43.658	0.0916212
pSyn_Nrg3_pSyn_Gfp	CO25	14	2	45.536	0.0439213
pSyn_Nrg3_pSyn_Gfp	CO25	15	5	52.366	0.0954818
pSyn_Nrg3_pSyn_Gfp	CO25	16	5	48.507	0.103078
pSyn_Nrg3_pSyn_Gfp	CO25	17	10	49.998	0.200008
pSyn_Nrg3_pSyn_Gfp	CO25	18	9	46.059	0.195402
pSyn_Nrg3_pSyn_Gfp	CO25	19	4	48.415	0.082619
pSyn_Nrg3_pSyn_Gfp	CO29	1	4	45.292	0.0883158
pSyn_Nrg3_pSyn_Gfp	CO29	2	13	58.601	0.221839
pSyn_Nrg3_pSyn_Gfp	CO29	3	3	46.104	0.0650703
pSyn_Nrg3_pSyn_Gfp	CO29	4	4	46.487	0.0860456
pSyn_Nrg3_pSyn_Gfp	CO29	5	1	61.013	0.01639
pSyn_Nrg3_pSyn_Gfp	CO29	6	3	52.716	0.0569087
pSyn_Nrg3_pSyn_Gfp	CO29	7	6	52.03	0.115318
pSyn_Nrg3_pSyn_Gfp	CO29	8	6	49.522	0.121158
pSyn_Nrg3_pSyn_Gfp	CO29	9	8	54.876	0.145783
pSyn_Nrg3_pSyn_Gfp	CO29	10	1	51.954	0.0192478
pSyn_Nrg3_pSyn_Gfp	CO29	11	6	55.269	0.10856
pSyn_Nrg3_pSyn_Gfp	CO29	12	4	46.16	0.0866551
pSyn_Nrg3_pSyn_Gfp	CO29	13	8	47.236	0.169362
pSyn_Nrg3_pSyn_Gfp	CO29	14	7	56.209	0.124535
pSyn_Nrg3_pSyn_Gfp	CO29	15	6	47.33	0.126769
pSyn_Nrg3_pSyn_Gfp	CO31	1	7	41.34	0.169328
pSyn_Nrg3_pSyn_Gfp	CO31	2	7	35.829	0.195372
pSyn_Nrg3_pSyn_Gfp	CO31	3	12	46.308	0.259134
pSyn_Nrg3_pSyn_Gfp	CO31	4	2	30.566	0.0654322
pSyn_Nrg3_pSyn_Gfp	CO31	5	7	46.881	0.149314
pSyn_Nrg3_pSyn_Gfp	CO31	6	7	48.101	0.145527
pSyn_Nrg3_pSyn_Gfp	CO31	7	11	43.394	0.253491
pSyn_Nrg3_pSyn_Gfp	CO31	8	3	35.175	0.0852878
pSyn_Nrg3_pSyn_Gfp	CO31	9	7	47.044	0.148797
pSyn_Nrg3_pSyn_Gfp	CO31	10	4	44.737	0.0894114
pSyn_Nrg3_pSyn_Gfp	CO31	11	4	38.116	0.104943
pSyn_Nrg3_pSyn_Gfp	CO31	12	3	39.781	0.0754129
pSyn_Nrg3_pSyn_Gfp	CO31	13	5	43.085	0.11605
pSyn_Nrg3_pSyn_Gfp	CO31	14	9	46.83	0.192184
pSyn_Nrg3_pSyn_Gfp	CO31	15	5	43.498	0.114948
pSyn_Nrg3_pSyn_Gfp	CO31	16	5	40.926	0.122172
pSyn_Nrg3_pSyn_Gfp	CO31	17	3	42.281	0.0709539
pSyn_Nrg3_pSyn_Gfp	CO31	18	3	45.304	0.0662193
pSyn_Nrg3_pSyn_Gfp	CO31	19	2	41.983	0.0476383
pSyn_Nrg3_pSyn_Gfp	CO31	20	7	45.036	0.155431

## Sheet: Excitatory_synapses
Plasmid	Brain	Cell	Count_vglut1_tdt_psd95	Perimeter_cell	Density_vglut1_tdt_pds95
pSyn_Gfp	DN232	1	6	67.592	0.0887679
pSyn_Gfp	DN232	2	2	53.145	0.0376329
pSyn_Gfp	DN232	3	1	54.891	0.0182179
pSyn_Gfp	DN232	4	6	50.648	0.118465
pSyn_Gfp	DN232	5	6	44.391	0.135163
pSyn_Gfp	DN232	6	5	53.372	0.0936821
pSyn_Gfp	DN232	7	4	64.252	0.0622549
pSyn_Gfp	DN232	8	6	60.542	0.0991048
pSyn_Gfp	DN232	9	12	54.853	0.218767
pSyn_Gfp	DN232	10	9	65.759	0.136863
pSyn_Gfp	DN232	11	8	62.672	0.127649
pSyn_Gfp	DN232	12	7	56.336	0.124254
pSyn_Gfp	DN232	13	12	67.387	0.178076
pSyn_Gfp	DN232	14	2	60.583	0.0330126
pSyn_Gfp	DN232	15	14	58.067	0.241101
pSyn_Gfp	DN232	16	1	41.024	0.024376
pSyn_Gfp	DN232	17	4	66.548	0.060107
pSyn_Gfp	DN232	18	4	56.871	0.0703346
pSyn_Gfp	DN232	19	1	53.947	0.0185367
pSyn_Gfp	DN232	20	2	57.238	0.0349418
pSyn_Gfp	DN232	21	3	62.247	0.0481951
pSyn_Gfp	DN232	22	1	52.085	0.0191994
pSyn_Gfp	DN232	23	6	46.689	0.12851
pSyn_Gfp	DN232	24	2	47.49	0.0421141
pSyn_Gfp	DN234	1	7	49.955	0.140126
pSyn_Gfp	DN234	2	9	56.968	0.157983
pSyn_Gfp	DN234	3	0	33.585	0
pSyn_Gfp	DN234	4	3	43.199	0.0694461
pSyn_Gfp	DN234	5	7	51.728	0.135323
pSyn_Gfp	DN234	6	6	53.577	0.111988
pSyn_Gfp	DN234	7	3	48.777	0.0615044
pSyn_Gfp	DN234	8	11	54.898	0.200372
pSyn_Gfp	DN234	9	9	56.721	0.158671
pSyn_Gfp	DN234	10	8	48.576	0.16469
pSyn_Gfp	DN234	11	5	64.88	0.0770654
pSyn_Gfp	DN234	12	4	53.886	0.0742308
pSyn_Gfp	DN234	13	11	45.754	0.240416
pSyn_Gfp	DN234	14	0	50.345	0
pSyn_Gfp	DN234	15	8	51.079	0.15662
pSyn_Gfp	DN234	16	1	51.148	0.0195511
pSyn_Gfp	DN234	17	8	62.966	0.127053
pSyn_Gfp	DN234	18	8	59.344	0.134807
pSyn_Gfp	DN234	19	5	50.177	0.0996472
pSyn_Gfp	DN234	20	2	61.247	0.0326547
pSyn_Gfp	DN234	21	3	61.282	0.048954
pSyn_Gfp	DN234	22	0	59.069	0
pSyn_Gfp	DN234	23	4	45.386	0.0881329
pSyn_Gfp	DN234	24	6	50.168	0.119598
pSyn_Gfp	DN234	25	6	56.102	0.106948
pSyn_Gfp	DN234	26	3	64.033	0.0468508
pSyn_Gfp	DN234	27	4	66.754	0.0599215
pSyn_Gfp	DN234	28	4	65.956	0.0606465
pSyn_Gfp	DN234	29	4	53.179	0.0752177
pSyn_Gfp	DN233	1	4	54.37	0.07357
pSyn_Gfp	DN233	2	3	56.173	0.0534064
pSyn_Gfp	DN233	3	4	55.848	0.071623
pSyn_Gfp	DN233	4	8	55.727	0.143557
pSyn_Gfp	DN233	5	1	61.329	0.0163055
pSyn_Gfp	DN233	6	8	57.543	0.139026
pSyn_Gfp	DN233	7	7	46.959	0.149066
pSyn_Gfp	DN233	8	5	53.252	0.0938932
pSyn_Gfp	DN233	9	8	57.509	0.139109
pSyn_Gfp	DN233	10	2	48.285	0.0414207
pSyn_Gfp	DN233	11	3	40.419	0.0742225
pSyn_Gfp	DN233	12	1	47.84	0.020903
pSyn_Gfp	DN233	13	1	48.592	0.0205795
pSyn_Gfp	DN233	14	5	53.232	0.0939285
pSyn_Gfp	DN233	15	2	62.636	0.0319305
pSyn_Nrg1_pSyn_Gfp	DN240	1	4	60.596	0.066011
pSyn_Nrg1_pSyn_Gfp	DN240	2	2	50.103	0.0399178
pSyn_Nrg1_pSyn_Gfp	DN240	3	2	44.326	0.0451202
pSyn_Nrg1_pSyn_Gfp	DN240	4	2	47.808	0.041834
pSyn_Nrg1_pSyn_Gfp	DN240	5	5	55.653	0.0898424
pSyn_Nrg1_pSyn_Gfp	DN240	6	4	59.551	0.0671693
pSyn_Nrg1_pSyn_Gfp	DN240	7	4	48.399	0.0826463
pSyn_Nrg1_pSyn_Gfp	DN240	8	4	52.239	0.0765711
pSyn_Nrg1_pSyn_Gfp	DN240	9	3	62.889	0.0477031
pSyn_Nrg1_pSyn_Gfp	DN240	10	2	37.976	0.0526648
pSyn_Nrg1_pSyn_Gfp	DN240	11	5	55.119	0.0907128
pSyn_Nrg1_pSyn_Gfp	DN240	12	4	59.489	0.0672393
pSyn_Nrg1_pSyn_Gfp	DN240	13	5	51.877	0.0963818
pSyn_Nrg1_pSyn_Gfp	DN240	14	6	55.673	0.107772
pSyn_Nrg1_pSyn_Gfp	DN240	15	7	58.683	0.119285
pSyn_Nrg1_pSyn_Gfp	DN240	16	1	40.799	0.0245104
pSyn_Nrg1_pSyn_Gfp	DN240	17	2	60.911	0.0328348
pSyn_Nrg1_pSyn_Gfp	DN240	18	3	41.47	0.0723415
pSyn_Nrg1_pSyn_Gfp	DN240	19	3	42.717	0.0702297
pSyn_Nrg1_pSyn_Gfp	DN243	1	9	55.034	0.163535
pSyn_Nrg1_pSyn_Gfp	DN243	2	6	45.958	0.130554
pSyn_Nrg1_pSyn_Gfp	DN243	3	1	37.35	0.0267738
pSyn_Nrg1_pSyn_Gfp	DN243	4	10	48.178	0.207564
pSyn_Nrg1_pSyn_Gfp	DN243	5	2	47.849	0.0417982
pSyn_Nrg1_pSyn_Gfp	DN243	6	2	51.448	0.0388742
pSyn_Nrg1_pSyn_Gfp	DN243	7	4	45.959	0.0870341
pSyn_Nrg1_pSyn_Gfp	DN243	8	1	57.436	0.0174107
pSyn_Nrg1_pSyn_Gfp	DN243	9	7	51.987	0.134649
pSyn_Nrg1_pSyn_Gfp	DN243	10	7	50.263	0.139267
pSyn_Nrg1_pSyn_Gfp	DN243	11	5	45.553	0.109762
pSyn_Nrg1_pSyn_Gfp	DN243	12	6	40.54	0.148002
pSyn_Nrg1_pSyn_Gfp	DN243	13	4	54.344	0.0736052
pSyn_Nrg1_pSyn_Gfp	DN243	14	4	56.358	0.0709748
pSyn_Nrg1_pSyn_Gfp	DN243	15	0	57.353	0
pSyn_Nrg1_pSyn_Gfp	DN243	16	2	46.28	0.0432152
pSyn_Nrg1_pSyn_Gfp	DN243	17	4	48.47	0.0825253
pSyn_Nrg1_pSyn_Gfp	DN243	18	7	42.058	0.166437
pSyn_Nrg1_pSyn_Gfp	DN243	19	2	51.515	0.0388236
pSyn_Nrg1_pSyn_Gfp	DN243	20	3	41.87	0.0716503
pSyn_Nrg1_pSyn_Gfp	DN243	21	3	41.019	0.0731368
pSyn_Nrg1_pSyn_Gfp	DN243	22	8	47.388	0.168819
pSyn_Nrg1_pSyn_Gfp	DN243	23	3	43.006	0.0697577
pSyn_Nrg1_pSyn_Gfp	DN243	24	0	49.118	0
pSyn_Nrg1_pSyn_Gfp	DN243	25	4	64.966	0.0615707
pSyn_Nrg1_pSyn_Gfp	DN241	1	11	58.104	0.189316
pSyn_Nrg1_pSyn_Gfp	DN241	2	4	45.385	0.0881348
pSyn_Nrg1_pSyn_Gfp	DN241	3	4	47.394	0.0843989
pSyn_Nrg1_pSyn_Gfp	DN241	4	2	42.785	0.0467454
pSyn_Nrg1_pSyn_Gfp	DN241	5	4	55.191	0.0724756
pSyn_Nrg1_pSyn_Gfp	DN241	6	5	46.914	0.106578
pSyn_Nrg1_pSyn_Gfp	DN241	7	3	50.1	0.0598802
pSyn_Nrg1_pSyn_Gfp	DN241	8	3	50.313	0.0596267
pSyn_Nrg1_pSyn_Gfp	DN241	9	6	48.805	0.122938
pSyn_Nrg1_pSyn_Gfp	DN241	10	3	53.797	0.0557652
pSyn_Nrg1_pSyn_Gfp	DN241	11	6	60.449	0.0992572
pSyn_Nrg1_pSyn_Gfp	DN241	12	4	49.25	0.0812183
pSyn_Nrg1_pSyn_Gfp	DN241	13	4	48.737	0.0820732
pSyn_Nrg1_pSyn_Gfp	DN241	14	3	45.193	0.066382
pSyn_Nrg1_pSyn_Gfp	DN241	15	4	47.991	0.083349
pSyn_Nrg1_pSyn_Gfp	DN241	16	8	42.002	0.190467
pSyn_Nrg1_pSyn_Gfp	DN241	17	5	50.572	0.0988689
pSyn_Nrg1_pSyn_Gfp	DN241	18	3	54.665	0.0548797
pSyn_Nrg1_pSyn_Gfp	DN235	1	3	47.48	0.0631845
pSyn_Nrg1_pSyn_Gfp	DN235	2	5	67.091	0.0745256
pSyn_Nrg1_pSyn_Gfp	DN235	3	1	54.173	0.0184594
pSyn_Nrg1_pSyn_Gfp	DN235	4	4	69.979	0.05716
pSyn_Nrg1_pSyn_Gfp	DN235	5	2	54.054	0.037
pSyn_Nrg1_pSyn_Gfp	DN235	6	2	51.169	0.0390862
pSyn_Nrg1_pSyn_Gfp	DN235	7	8	50.947	0.157026
pSyn_Nrg1_pSyn_Gfp	DN235	8	2	44.49	0.0449539
pSyn_Nrg1_pSyn_Gfp	DN235	9	3	52.048	0.0576391
pSyn_Nrg1_pSyn_Gfp	DN235	10	7	51.62	0.135606
pSyn_Nrg1_pSyn_Gfp	DN235	11	5	44.336	0.112775
pSyn_Nrg1_pSyn_Gfp	DN235	12	3	51.915	0.0577868
pSyn_Nrg1_pSyn_Gfp	DN235	13	8	57.031	0.140275
pSyn_Nrg1_pSyn_Gfp	DN235	14	5	55.287	0.0904372
pSyn_Nrg1_pSyn_Gfp	DN235	15	2	50.238	0.0398105
pSyn_Nrg1_pSyn_Gfp	DN235	16	6	51.406	0.116718
pSyn_Nrg1_pSyn_Gfp	DN235	17	2	44.991	0.0444533
pSyn_Nrg1_pSyn_Gfp	DN235	18	4	64.429	0.0620838
pSyn_Nrg1_pSyn_Gfp	DN235	19	8	50.623	0.158031
pSyn_Nrg1_pSyn_Gfp	DN235	20	7	51.001	0.137252
pSyn_Nrg1_pSyn_Gfp	DN235	21	3	52.488	0.0571559
pSyn_Nrg1_pSyn_Gfp	DN235	22	5	63.834	0.0783282
pSyn_Nrg1_pSyn_Gfp	DN235	23	4	48.802	0.0819639
pSyn_Nrg1_pSyn_Gfp	DN235	24	7	57.513	0.121712
pSyn_Nrg1_pSyn_Gfp	DN235	25	4	42.23	0.0947194
pSyn_Nrg1_pSyn_Gfp	DN235	26	3	48.862	0.0613974
pSyn_Nrg1_pSyn_Gfp	DN235	27	6	59.54	0.100773
pSyn_Nrg1_pSyn_Gfp	DN235	28	5	48.475	0.103146
pSyn_Nrg1_pSyn_Gfp	DN235	29	4	50.652	0.0789702
pSyn_Nrg1_pSyn_Gfp	DN219	1	4	45.555	0.0878059
pSyn_Nrg1_pSyn_Gfp	DN219	2	0	50.682	0
pSyn_Nrg1_pSyn_Gfp	DN219	3	10	43.916	0.227707
pSyn_Nrg1_pSyn_Gfp	DN219	4	6	49.975	0.12006
pSyn_Nrg1_pSyn_Gfp	DN219	5	5	48.337	0.10344
pSyn_Nrg1_pSyn_Gfp	DN219	6	5	49.954	0.100092
pSyn_Nrg1_pSyn_Gfp	DN219	7	6	39.752	0.150936
pSyn_Nrg1_pSyn_Gfp	DN219	8	2	40.208	0.0497413
pSyn_Nrg1_pSyn_Gfp	DN219	9	3	54.716	0.0548286
pSyn_Nrg1_pSyn_Gfp	DN219	10	6	47.308	0.126828
pSyn_Nrg1_pSyn_Gfp	DN219	11	3	45.284	0.0662486
pSyn_Nrg1_pSyn_Gfp	DN219	12	10	56.565	0.176788
pSyn_Nrg1_pSyn_Gfp	DN219	13	3	63.635	0.0471439
pSyn_Nrg1_pSyn_Gfp	DN219	14	6	58.324	0.102874
pSyn_Nrg1_pSyn_Gfp	DN219	15	3	48.305	0.0621054
pSyn_Nrg1_pSyn_Gfp	DN219	16	2	51.954	0.0384956
pSyn_Nrg1_pSyn_Gfp	DN219	17	5	42.717	0.117049
pSyn_Nrg1_pSyn_Gfp	DN219	18	4	45.23	0.0884369
pSyn_Nrg1_pSyn_Gfp	DN219	19	6	48.117	0.124696
pSyn_Nrg1_pSyn_Gfp	DN219	20	6	36.467	0.164532
pSyn_Nrg1_pSyn_Gfp	DN219	21	4	49.669	0.0805331
pSyn_Nrg1_pSyn_Gfp	DN219	22	7	45.114	0.155162
pSyn_Nrg1_pSyn_Gfp	DN219	23	7	58.557	0.119542
pSyn_Nrg1_pSyn_Gfp	DN219	24	7	53.609	0.130575
pSyn_Nrg1_pSyn_Gfp	DN219	25	5	56.877	0.087909
pSyn_Gfp	CO55	1	4	39.89	0.100276
pSyn_Gfp	CO55	2	3	41.138	0.0729253
pSyn_Gfp	CO55	3	9	47.629	0.188961
pSyn_Gfp	CO55	4	7	41.484	0.16874
pSyn_Gfp	CO55	5	5	43.058	0.116122
pSyn_Gfp	CO55	6	10	52.206	0.191549
pSyn_Gfp	CO55	7	3	48.074	0.0624038
pSyn_Gfp	CO55	8	4	48.021	0.0832969
pSyn_Gfp	CO55	9	1	44.392	0.0225266
pSyn_Gfp	CO55	10	6	54.213	0.110675
pSyn_Gfp	CO55	11	3	43.287	0.0693049
pSyn_Gfp	CO55	12	4	44.172	0.0905551
pSyn_Gfp	CO53	1	7	49.831	0.140475
pSyn_Gfp	CO53	2	17	56.25	0.302222
pSyn_Gfp	CO53	3	6	51.117	0.117378
pSyn_Gfp	CO53	4	4	54.352	0.0735943
pSyn_Gfp	CO53	5	8	54.062	0.147978
pSyn_Gfp	CO53	6	1	36.461	0.0274266
pSyn_Gfp	CO53	7	1	42.013	0.0238022
pSyn_Gfp	CO53	8	6	51.443	0.116634
pSyn_Gfp	CO53	9	5	58.691	0.0851919
pSyn_Gfp	CO53	10	7	57.006	0.122794
pSyn_Gfp	CO53	11	1	53.169	0.018808
pSyn_Gfp	CO53	12	6	55.06	0.108972
pSyn_Gfp	CO53	13	8	56.644	0.141233
pSyn_Gfp	CO53	14	4	64.873	0.0616589
pSyn_Gfp	CO53	15	3	50.198	0.0597633
pSyn_Gfp	CO53	16	2	45.155	0.0442919
pSyn_Gfp	CO53	17	9	53.248	0.16902
pSyn_Gfp	CO53	18	4	55.359	0.0722556
pSyn_Gfp	CO53	19	6	50.509	0.118791
pSyn_Gfp	CO53	20	5	50.433	0.0991414
pSyn_Gfp	CO53	21	3	43.573	0.06885
pSyn_Gfp	CO53	22	9	51.122	0.176049
pSyn_Gfp	CO53	23	5	46.773	0.106899
pSyn_Gfp	CO53	24	1	43.583	0.0229447
pSyn_Gfp	CO53	25	4	51.912	0.0770535
pSyn_Gfp	CO53	26	4	56.966	0.0702173
pSyn_Gfp	CO54	1	4	60.731	0.0658642
pSyn_Gfp	CO54	2	5	62.423	0.0800987
pSyn_Gfp	CO54	3	3	50.391	0.0595344
pSyn_Gfp	CO54	4	0	54.53	0
pSyn_Gfp	CO54	5	3	47.937	0.0625821
pSyn_Gfp	CO54	6	2	55.979	0.0357277
pSyn_Gfp	CO54	7	2	49.345	0.040531
pSyn_Gfp	CO54	8	4	55.841	0.071632
pSyn_Gfp	CO54	9	2	39.436	0.0507151
pSyn_Gfp	CO54	10	5	51.899	0.096341
pSyn_Gfp	CO54	11	11	57.245	0.192157
pSyn_Gfp	CO54	12	3	56.613	0.0529914
pSyn_Gfp	CO54	13	4	65.041	0.0614997
pSyn_Gfp	CO54	14	5	55.798	0.0896089
pSyn_Gfp	CO54	15	3	42.217	0.0710614
pSyn_Gfp	CO54	16	3	46.054	0.0651409
pSyn_Gfp	CO54	17	2	52.017	0.038449
pSyn_Gfp	CO52	1	9	52.957	0.169949
pSyn_Gfp	CO52	2	8	58.646	0.136412
pSyn_Gfp	CO52	3	12	53.975	0.222325
pSyn_Gfp	CO52	4	4	51.136	0.0782228
pSyn_Gfp	CO52	5	3	54.858	0.0546866
pSyn_Gfp	CO52	6	3	53.084	0.0565142
pSyn_Gfp	CO52	7	5	69.458	0.0719859
pSyn_Gfp	CO52	8	4	54.275	0.0736988
pSyn_Gfp	CO52	9	5	43.809	0.114132
pSyn_Gfp	CO52	10	2	38.499	0.0519494
pSyn_Gfp	CO52	11	4	45.537	0.0878407
pSyn_Gfp	CO52	12	0	40.56	0
pSyn_Gfp	CO52	13	8	66.574	0.120167
pSyn_Gfp	CO59	1	1	54.168	0.0184611
pSyn_Gfp	CO59	2	5	54.376	0.0919523
pSyn_Gfp	CO59	3	10	50.019	0.199924
pSyn_Gfp	CO59	4	7	56.128	0.124715
pSyn_Gfp	CO59	5	3	48.213	0.0622239
pSyn_Gfp	CO59	6	5	43.93	0.113817
pSyn_Gfp	CO59	7	5	54.405	0.0919033
pSyn_Gfp	CO59	8	7	58.487	0.119685
pSyn_Gfp	CO59	9	7	59.076	0.118491
pSyn_Gfp	CO59	10	3	59.532	0.0503931
pSyn_Gfp	CO59	11	2	54.86	0.0364564
pSyn_Nrg3_pSyn_Gfp	CO30	1	13	52.033	0.249841
pSyn_Nrg3_pSyn_Gfp	CO30	2	4	39.986	0.100035
pSyn_Nrg3_pSyn_Gfp	CO30	3	2	43.273	0.0462182
pSyn_Nrg3_pSyn_Gfp	CO30	4	4	55.538	0.0720228
pSyn_Nrg3_pSyn_Gfp	CO30	5	3	42.346	0.0708449
pSyn_Nrg3_pSyn_Gfp	CO30	6	8	55.568	0.143968
pSyn_Nrg3_pSyn_Gfp	CO30	7	4	48.866	0.0818565
pSyn_Nrg3_pSyn_Gfp	CO30	8	8	45.639	0.175289
pSyn_Nrg3_pSyn_Gfp	CO30	9	7	43.613	0.160503
pSyn_Nrg3_pSyn_Gfp	CO30	10	6	56.535	0.106129
pSyn_Nrg3_pSyn_Gfp	CO30	11	13	51.813	0.250902
pSyn_Nrg3_pSyn_Gfp	CO30	12	6	56.445	0.106298
pSyn_Nrg3_pSyn_Gfp	CO30	13	7	57.117	0.122555
pSyn_Nrg3_pSyn_Gfp	CO28	1	11	48.937	0.224779
pSyn_Nrg3_pSyn_Gfp	CO28	2	3	46.443	0.0645953
pSyn_Nrg3_pSyn_Gfp	CO28	3	6	45.535	0.131767
pSyn_Nrg3_pSyn_Gfp	CO28	4	14	53.003	0.264136
pSyn_Nrg3_pSyn_Gfp	CO28	5	7	49.468	0.141506
pSyn_Nrg3_pSyn_Gfp	CO28	6	5	55.324	0.0903767
pSyn_Nrg3_pSyn_Gfp	CO28	7	18	61.248	0.293887
pSyn_Nrg3_pSyn_Gfp	CO28	8	6	56.916	0.105419
pSyn_Nrg3_pSyn_Gfp	CO28	9	8	64.29	0.124436
pSyn_Nrg3_pSyn_Gfp	CO28	10	12	53.229	0.225441
pSyn_Nrg3_pSyn_Gfp	CO28	11	9	69.144	0.130163
pSyn_Nrg3_pSyn_Gfp	CO28	12	9	54.478	0.165204
pSyn_Nrg3_pSyn_Gfp	CO28	13	5	51.108	0.097832
pSyn_Nrg3_pSyn_Gfp	CO28	14	7	55.209	0.126791
pSyn_Nrg3_pSyn_Gfp	CO28	15	5	51.569	0.0969575
pSyn_Nrg3_pSyn_Gfp	CO28	16	6	52.645	0.113971
pSyn_Nrg3_pSyn_Gfp	CO28	17	9	61.799	0.145633
pSyn_Nrg3_pSyn_Gfp	CO28	18	6	61.578	0.0974374
pSyn_Nrg3_pSyn_Gfp	CO28	19	4	49.879	0.0801941
pSyn_Nrg3_pSyn_Gfp	CO28	20	7	40.469	0.172972
pSyn_Nrg3_pSyn_Gfp	CO29	1	3	49.352	0.0607878
pSyn_Nrg3_pSyn_Gfp	CO29	2	5	49.25	0.101523
pSyn_Nrg3_pSyn_Gfp	CO29	3	8	48.165	0.166096
pSyn_Nrg3_pSyn_Gfp	CO29	4	10	51.869	0.192793
pSyn_Nrg3_pSyn_Gfp	CO29	5	3	45.568	0.0658357
pSyn_Nrg3_pSyn_Gfp	CO29	6	7	48.44	0.144509
pSyn_Nrg3_pSyn_Gfp	CO29	7	5	51.338	0.0973937
pSyn_Nrg3_pSyn_Gfp	CO29	8	5	52.359	0.0954946
pSyn_Nrg3_pSyn_Gfp	CO29	9	2	44.959	0.044485
pSyn_Nrg3_pSyn_Gfp	CO29	10	6	47.007	0.127641
pSyn_Nrg3_pSyn_Gfp	CO29	11	8	45.492	0.175855
pSyn_Nrg3_pSyn_Gfp	CO29	12	4	57.801	0.069203
pSyn_Nrg3_pSyn_Gfp	CO25	1	4	53.768	0.0743937
pSyn_Nrg3_pSyn_Gfp	CO25	2	13	68.218	0.190566
pSyn_Nrg3_pSyn_Gfp	CO25	3	5	64.785	0.0771784
pSyn_Nrg3_pSyn_Gfp	CO25	4	8	59.979	0.13338
pSyn_Nrg3_pSyn_Gfp	CO25	5	8	55.125	0.145125
pSyn_Nrg3_pSyn_Gfp	CO25	6	7	57.854	0.120994
pSyn_Nrg3_pSyn_Gfp	CO25	7	8	50.374	0.158812
pSyn_Nrg3_pSyn_Gfp	CO25	8	9	61.834	0.145551
pSyn_Nrg3_pSyn_Gfp	CO25	9	3	55.058	0.054488
pSyn_Nrg3_pSyn_Gfp	CO25	10	7	52.584	0.13312
pSyn_Nrg3_pSyn_Gfp	CO25	11	9	43.951	0.204773
pSyn_Nrg3_pSyn_Gfp	CO25	12	6	56.701	0.105818
pSyn_Nrg3_pSyn_Gfp	CO25	13	5	54.965	0.090967
pSyn_Nrg3_pSyn_Gfp	CO32	1	6	64.792	0.092604
pSyn_Nrg3_pSyn_Gfp	CO32	2	12	53.245	0.225373
pSyn_Nrg3_pSyn_Gfp	CO32	3	3	46.365	0.064704
pSyn_Nrg3_pSyn_Gfp	CO32	4	3	51.09	0.0587199
pSyn_Nrg3_pSyn_Gfp	CO32	5	7	55.133	0.126966
pSyn_Nrg3_pSyn_Gfp	CO32	6	4	54.26	0.0737191
pSyn_Nrg3_pSyn_Gfp	CO32	7	8	62.573	0.127851
pSyn_Nrg3_pSyn_Gfp	CO32	8	8	53.784	0.148743
pSyn_Nrg3_pSyn_Gfp	CO32	9	6	51.877	0.115658
pSyn_Nrg3_pSyn_Gfp	CO32	10	1	64.916	0.0154045
pSyn_Nrg3_pSyn_Gfp	CO32	11	16	59.488	0.268962
pSyn_Nrg3_pSyn_Gfp	CO32	12	9	61.074	0.147362
pSyn_Nrg3_pSyn_Gfp	CO32	13	8	48.132	0.16621
pSyn_Nrg3_pSyn_Gfp	CO32	14	4	41.345	0.0967469
pSyn_Nrg3_pSyn_Gfp	CO32	15	7	50.442	0.138773
pSyn_Nrg3_pSyn_Gfp	CO32	16	6	45.119	0.132982
pSyn_Nrg3_pSyn_Gfp	CO32	17	15	52.802	0.28408
pSyn_Nrg3_pSyn_Gfp	CO32	18	7	45.561	0.15364
pSyn_Nrg3_pSyn_Gfp	CO32	19	14	51.926	0.269614
pSyn_Nrg3_pSyn_Gfp	CO32	20	4	53.267	0.0750934
pSyn_Nrg3_pSyn_Gfp	CO32	21	1	48.267	0.0207181
pSyn_Nrg3_pSyn_Gfp	CO32	22	6	51.503	0.116498
pSyn_Nrg3_pSyn_Gfp	CO32	23	2	49.242	0.0406157
pSyn_Nrg3_pSyn_Gfp	CO32	24	4	45.301	0.0882983
pSyn_Nrg3_pSyn_Gfp	CO32	25	8	61.413	0.130266
pSyn_Nrg3_pSyn_Gfp	CO32	26	3	38.605	0.0777101
pSyn_Nrg3_pSyn_Gfp	CO31	1	5	46.465	0.107608
pSyn_Nrg3_pSyn_Gfp	CO31	2	15	48.473	0.309451
pSyn_Nrg3_pSyn_Gfp	CO31	3	6	50.912	0.11785
pSyn_Nrg3_pSyn_Gfp	CO31	4	11	63.146	0.174199
pSyn_Nrg3_pSyn_Gfp	CO31	5	13	52.554	0.247365
pSyn_Nrg3_pSyn_Gfp	CO31	6	14	64.399	0.217395
pSyn_Nrg3_pSyn_Gfp	CO31	7	3	49.075	0.0611309
pSyn_Nrg3_pSyn_Gfp	CO31	8	7	62.291	0.112376
pSyn_Nrg3_pSyn_Gfp	CO31	9	6	58.93	0.101816
pSyn_Nrg3_pSyn_Gfp	CO31	10	4	43.575	0.0917958
pSyn_Nrg3_pSyn_Gfp	CO31	11	5	56.489	0.0885128
pSyn_Nrg3_pSyn_Gfp	CO31	12	8	43.225	0.185078
pSyn_Nrg3_pSyn_Gfp	CO31	13	8	51.285	0.155991
pSyn_Nrg3_pSyn_Gfp	CO31	14	8	64.773	0.123508
pSyn_Nrg3_pSyn_Gfp	CO31	15	1	43.705	0.0228807
pSyn_Nrg3_pSyn_Gfp	CO31	16	7	57.087	0.12262
pSyn_Nrg3_pSyn_Gfp	CO31	17	6	40.49	0.148185
