# Supplementary material for: Subcellular sorting of neuregulins controls the assembly of excitatory-inhibitory cortical circuits
Source: eLife. 2020 Dec 15;9:e57000. doi: 10.7554/eLife.57000 (PMC7755390; doi:10.7554/eLife.57000)
Supplement: Figure 3—figure supplement 1—source data 1. [file elife-57000-fig3-figsupp1-data1.xlsx]

## Sheet: Puncta_Density_Nrg1
Genotype	Layer	Brain	ROI	Puncta_nrg1	Area_field	Density_nrg1
Nrg1_wildtype	Stratum_Pyramidale	CB541	1	74	2000	3.7
Nrg1_wildtype	Stratum_Pyramidale	CB541	2	75	2000	3.75
Nrg1_wildtype	Stratum_Pyramidale	CB541	3	62	2000	3.1
Nrg1_wildtype	Stratum_Pyramidale	CB541	4	76	2000	3.8
Nrg1_wildtype	Stratum_Pyramidale	CB541	5	84	2000	4.2
Nrg1_wildtype	Stratum_Pyramidale	CB541	6	75	2000	3.75
Nrg1_wildtype	Stratum_Pyramidale	CB541	7	63	2000	3.15
Nrg1_wildtype	Stratum_Pyramidale	CB541	8	62	2000	3.1
Nrg1_wildtype	Stratum_Pyramidale	CB541	9	83	2000	4.15
Nrg1_wildtype	Stratum_Pyramidale	CB541	10	116	2000	5.8
Nrg1_mutant	Stratum_Pyramidale	CB632	1	35	2000	1.75
Nrg1_mutant	Stratum_Pyramidale	CB632	2	37	2000	1.85
Nrg1_mutant	Stratum_Pyramidale	CB632	3	15	2000	0.75
Nrg1_mutant	Stratum_Pyramidale	CB632	4	9	2000	0.45
Nrg1_mutant	Stratum_Pyramidale	CB632	5	18	2000	0.9
Nrg1_mutant	Stratum_Pyramidale	CB632	6	25	2000	1.25
Nrg1_mutant	Stratum_Pyramidale	CB632	7	14	2000	0.7
Nrg1_mutant	Stratum_Pyramidale	CB632	8	7	2000	0.35
Nrg1_mutant	Stratum_Pyramidale	CB632	9	43	2000	2.15
Nrg1_mutant	Stratum_Pyramidale	CB632	10	7	2000	0.35
Nrg1_wildtype	Stratum_Pyramidale	CB635	1	132	2000	6.6
Nrg1_wildtype	Stratum_Pyramidale	CB635	2	154	2000	7.7
Nrg1_wildtype	Stratum_Pyramidale	CB635	3	175	2000	8.75
Nrg1_wildtype	Stratum_Pyramidale	CB635	4	78	2000	3.9
Nrg1_wildtype	Stratum_Pyramidale	CB635	5	110	2000	5.5
Nrg1_wildtype	Stratum_Pyramidale	CB635	6	146	2000	7.3
Nrg1_wildtype	Stratum_Pyramidale	CB635	7	121	2000	6.05
Nrg1_wildtype	Stratum_Pyramidale	CB635	8	140	2000	7
Nrg1_wildtype	Stratum_Pyramidale	CB635	9	152	2000	7.6
Nrg1_wildtype	Stratum_Pyramidale	CB635	10	126	2000	6.3
Nrg1_mutant	Stratum_Pyramidale	CB634	1	18	2000	0.9
Nrg1_mutant	Stratum_Pyramidale	CB634	2	34	2000	1.7
Nrg1_mutant	Stratum_Pyramidale	CB634	3	20	2000	1
Nrg1_mutant	Stratum_Pyramidale	CB634	4	14	2000	0.7
Nrg1_mutant	Stratum_Pyramidale	CB634	5	12	2000	0.6
Nrg1_mutant	Stratum_Pyramidale	CB634	6	18	2000	0.9
Nrg1_mutant	Stratum_Pyramidale	CB634	7	21	2000	1.05
Nrg1_mutant	Stratum_Pyramidale	CB634	8	14	2000	0.7
Nrg1_mutant	Stratum_Pyramidale	CB634	9	19	2000	0.95
Nrg1_mutant	Stratum_Pyramidale	CB634	10	32	2000	1.6
Nrg1_wildtype	Stratum_Pyramidale	CB660	1	175	2000	8.75
Nrg1_wildtype	Stratum_Pyramidale	CB660	2	113	2000	5.65
Nrg1_wildtype	Stratum_Pyramidale	CB660	3	144	2000	7.2
Nrg1_wildtype	Stratum_Pyramidale	CB660	4	111	2000	5.55
Nrg1_wildtype	Stratum_Pyramidale	CB660	5	162	2000	8.1
Nrg1_wildtype	Stratum_Pyramidale	CB660	6	134	2000	6.7
Nrg1_wildtype	Stratum_Pyramidale	CB660	7	120	2000	6
Nrg1_wildtype	Stratum_Pyramidale	CB660	8	81	2000	4.05
Nrg1_wildtype	Stratum_Pyramidale	CB660	9	96	2000	4.8
Nrg1_wildtype	Stratum_Pyramidale	CB660	10	114	2000	5.7
Nrg1_mutant	Stratum_Pyramidale	CB658	1	14	2000	0.7
Nrg1_mutant	Stratum_Pyramidale	CB658	2	17	2000	0.85
Nrg1_mutant	Stratum_Pyramidale	CB658	3	21	2000	1.05
Nrg1_mutant	Stratum_Pyramidale	CB658	4	35	2000	1.75
Nrg1_mutant	Stratum_Pyramidale	CB658	5	29	2000	1.45
Nrg1_mutant	Stratum_Pyramidale	CB658	6	43	2000	2.15
Nrg1_mutant	Stratum_Pyramidale	CB658	7	33	2000	1.65
Nrg1_mutant	Stratum_Pyramidale	CB658	8	35	2000	1.75
Nrg1_mutant	Stratum_Pyramidale	CB658	9	38	2000	1.9
Nrg1_mutant	Stratum_Pyramidale	CB658	10	41	2000	2.05
Nrg1_wildtype	Stratum_Pyramidale	CB664	1	86	2000	4.3
Nrg1_wildtype	Stratum_Pyramidale	CB664	2	104	2000	5.2
Nrg1_wildtype	Stratum_Pyramidale	CB664	3	95	2000	4.75
Nrg1_wildtype	Stratum_Pyramidale	CB664	4	72	2000	3.6
Nrg1_wildtype	Stratum_Pyramidale	CB664	5	67	2000	3.35
Nrg1_wildtype	Stratum_Pyramidale	CB664	6	63	2000	3.15
Nrg1_wildtype	Stratum_Pyramidale	CB664	7	87	2000	4.35
Nrg1_wildtype	Stratum_Pyramidale	CB664	8	81	2000	4.05
Nrg1_wildtype	Stratum_Pyramidale	CB664	9	103	2000	5.15
Nrg1_wildtype	Stratum_Pyramidale	CB664	10	74	2000	3.7
Nrg1_mutant	Stratum_Pyramidale	CB661	1	17	2000	0.85
Nrg1_mutant	Stratum_Pyramidale	CB661	2	17	2000	0.85
Nrg1_mutant	Stratum_Pyramidale	CB661	3	29	2000	1.45
Nrg1_mutant	Stratum_Pyramidale	CB661	4	31	2000	1.55
Nrg1_mutant	Stratum_Pyramidale	CB661	5	17	2000	0.85
Nrg1_mutant	Stratum_Pyramidale	CB661	6	21	2000	1.05
Nrg1_mutant	Stratum_Pyramidale	CB661	7	26	2000	1.3
Nrg1_mutant	Stratum_Pyramidale	CB661	8	10	2000	0.5
Nrg1_mutant	Stratum_Pyramidale	CB661	9	26	2000	1.3
Nrg1_mutant	Stratum_Pyramidale	CB661	10	12	2000	0.6
Nrg1_wildtype	Stratum_Radiatum	CB541	1	18	2000	0.9
Nrg1_wildtype	Stratum_Radiatum	CB541	2	6	2000	0.3
Nrg1_wildtype	Stratum_Radiatum	CB541	3	11	2000	0.55
Nrg1_wildtype	Stratum_Radiatum	CB541	4	12	2000	0.6
Nrg1_wildtype	Stratum_Radiatum	CB541	5	18	2000	0.9
Nrg1_wildtype	Stratum_Radiatum	CB541	6	20	2000	1
Nrg1_wildtype	Stratum_Radiatum	CB541	7	15	2000	0.75
Nrg1_wildtype	Stratum_Radiatum	CB541	8	15	2000	0.75
Nrg1_wildtype	Stratum_Radiatum	CB541	9	9	2000	0.45
Nrg1_wildtype	Stratum_Radiatum	CB541	10	9	2000	0.45
Nrg1_mutant	Stratum_Radiatum	CB632	1	13	2000	0.65
Nrg1_mutant	Stratum_Radiatum	CB632	2	20	2000	1
Nrg1_mutant	Stratum_Radiatum	CB632	3	21	2000	1.05
Nrg1_mutant	Stratum_Radiatum	CB632	4	20	2000	1
Nrg1_mutant	Stratum_Radiatum	CB632	5	9	2000	0.45
Nrg1_mutant	Stratum_Radiatum	CB632	6	32	2000	1.6
Nrg1_mutant	Stratum_Radiatum	CB632	7	33	2000	1.65
Nrg1_mutant	Stratum_Radiatum	CB632	8	4	2000	0.2
Nrg1_mutant	Stratum_Radiatum	CB632	9	7	2000	0.35
Nrg1_mutant	Stratum_Radiatum	CB632	10	11	2000	0.55
Nrg1_wildtype	Stratum_Radiatum	CB635	1	38	2000	1.9
Nrg1_wildtype	Stratum_Radiatum	CB635	2	27	2000	1.35
Nrg1_wildtype	Stratum_Radiatum	CB635	3	12	2000	0.6
Nrg1_wildtype	Stratum_Radiatum	CB635	4	32	2000	1.6
Nrg1_wildtype	Stratum_Radiatum	CB635	5	46	2000	2.3
Nrg1_wildtype	Stratum_Radiatum	CB635	6	7	2000	0.35
Nrg1_wildtype	Stratum_Radiatum	CB635	7	22	2000	1.1
Nrg1_wildtype	Stratum_Radiatum	CB635	8	18	2000	0.9
Nrg1_wildtype	Stratum_Radiatum	CB635	9	23	2000	1.15
Nrg1_wildtype	Stratum_Radiatum	CB635	10	22	2000	1.1
Nrg1_mutant	Stratum_Radiatum	CB634	1	16	2000	0.8
Nrg1_mutant	Stratum_Radiatum	CB634	2	29	2000	1.45
Nrg1_mutant	Stratum_Radiatum	CB634	3	21	2000	1.05
Nrg1_mutant	Stratum_Radiatum	CB634	4	37	2000	1.85
Nrg1_mutant	Stratum_Radiatum	CB634	5	30	2000	1.5
Nrg1_mutant	Stratum_Radiatum	CB634	6	27	2000	1.35
Nrg1_mutant	Stratum_Radiatum	CB634	7	27	2000	1.35
Nrg1_mutant	Stratum_Radiatum	CB634	8	18	2000	0.9
Nrg1_mutant	Stratum_Radiatum	CB634	9	14	2000	0.7
Nrg1_mutant	Stratum_Radiatum	CB634	10	43	2000	2.15
Nrg1_wildtype	Stratum_Radiatum	CB660	1	30	2000	1.5
Nrg1_wildtype	Stratum_Radiatum	CB660	2	31	2000	1.55
Nrg1_wildtype	Stratum_Radiatum	CB660	3	21	2000	1.05
Nrg1_wildtype	Stratum_Radiatum	CB660	4	21	2000	1.05
Nrg1_wildtype	Stratum_Radiatum	CB660	5	4	2000	0.2
Nrg1_wildtype	Stratum_Radiatum	CB660	6	14	2000	0.7
Nrg1_wildtype	Stratum_Radiatum	CB660	7	17	2000	0.85
Nrg1_wildtype	Stratum_Radiatum	CB660	8	12	2000	0.6
Nrg1_wildtype	Stratum_Radiatum	CB660	9	13	2000	0.65
Nrg1_wildtype	Stratum_Radiatum	CB660	10	30	2000	1.5
Nrg1_mutant	Stratum_Radiatum	CB658	1	35	2000	1.75
Nrg1_mutant	Stratum_Radiatum	CB658	2	40	2000	2
Nrg1_mutant	Stratum_Radiatum	CB658	3	31	2000	1.55
Nrg1_mutant	Stratum_Radiatum	CB658	4	24	2000	1.2
Nrg1_mutant	Stratum_Radiatum	CB658	5	29	2000	1.45
Nrg1_mutant	Stratum_Radiatum	CB658	6	50	2000	2.5
Nrg1_mutant	Stratum_Radiatum	CB658	7	30	2000	1.5
Nrg1_mutant	Stratum_Radiatum	CB658	8	13	2000	0.65
Nrg1_mutant	Stratum_Radiatum	CB658	9	28	2000	1.4
Nrg1_mutant	Stratum_Radiatum	CB658	10	36	2000	1.8
Nrg1_wildtype	Stratum_Radiatum	CB664	1	22	2000	1.1
Nrg1_wildtype	Stratum_Radiatum	CB664	2	13	2000	0.65
Nrg1_wildtype	Stratum_Radiatum	CB664	3	12	2000	0.6
Nrg1_wildtype	Stratum_Radiatum	CB664	4	16	2000	0.8
Nrg1_wildtype	Stratum_Radiatum	CB664	5	7	2000	0.35
Nrg1_wildtype	Stratum_Radiatum	CB664	6	11	2000	0.55
Nrg1_wildtype	Stratum_Radiatum	CB664	7	21	2000	1.05
Nrg1_wildtype	Stratum_Radiatum	CB664	8	11	2000	0.55
Nrg1_wildtype	Stratum_Radiatum	CB664	9	13	2000	0.65
Nrg1_wildtype	Stratum_Radiatum	CB664	10	8	2000	0.4
Nrg1_mutant	Stratum_Radiatum	CB661	1	10	2000	0.5
Nrg1_mutant	Stratum_Radiatum	CB661	2	28	2000	1.4
Nrg1_mutant	Stratum_Radiatum	CB661	3	21	2000	1.05
Nrg1_mutant	Stratum_Radiatum	CB661	4	16	2000	0.8
Nrg1_mutant	Stratum_Radiatum	CB661	5	5	2000	0.25
Nrg1_mutant	Stratum_Radiatum	CB661	6	13	2000	0.65
Nrg1_mutant	Stratum_Radiatum	CB661	7	5	2000	0.25
Nrg1_mutant	Stratum_Radiatum	CB661	8	10	2000	0.5
Nrg1_mutant	Stratum_Radiatum	CB661	9	12	2000	0.6
Nrg1_mutant	Stratum_Radiatum	CB661	10	5	2000	0.25
