# Supplementary material for: Subcellular sorting of neuregulins controls the assembly of excitatory-inhibitory cortical circuits
Source: eLife. 2020 Dec 15;9:e57000. doi: 10.7554/eLife.57000 (PMC7755390; doi:10.7554/eLife.57000)
Supplement: Figure 3—figure supplement 2—source data 1. [file elife-57000-fig3-figsupp2-data1.xlsx]

## Sheet: Puncta_Density_Nrg3
Genotype	Region	Brain	ROI	Count_nrg3_contact_pv	Count_nrg3_not_contact_pv	Count_nrg3_all_clusters	Area_field	Density_nrg3_contact_pv	Density_nrg3_not_contact_pv	Density_nrg3_all_clusters
Nrg3_mutant	Neocortex	CB532	1	40	13	53	24025	1.66493	0.541103	2.20604
Nrg3_mutant	Neocortex	CB532	2	48	11	59	24025	1.99792	0.457856	2.45578
Nrg3_mutant	Neocortex	CB532	3	40	12	52	24025	1.66493	0.49948	2.16441
Nrg3_mutant	Neocortex	CB532	4	61	12	73	24025	2.53902	0.49948	3.0385
Nrg3_mutant	Neocortex	CB532	5	58	16	74	24025	2.41415	0.665973	3.08012
Nrg3_mutant	Neocortex	CB532	6	42	15	57	24025	1.74818	0.62435	2.37253
Nrg3_mutant	Neocortex	CB532	7	46	8	54	24025	1.91467	0.332986	2.24766
Nrg3_mutant	Neocortex	CB532	8	40	8	48	24025	1.66493	0.332986	1.99792
Nrg3_mutant	Neocortex	CB532	9	43	14	57	24025	1.7898	0.582726	2.37253
Nrg3_mutant	Neocortex	CB532	10	47	26	73	24025	1.9563	1.08221	3.0385
Nrg3_mutant	Neocortex	CB532	11	63	15	78	24025	2.62227	0.62435	3.24662
Nrg3_mutant	Neocortex	CB532	12	44	17	61	24025	1.83143	0.707596	2.53902
Nrg3_wildtype	Neocortex	CB538	1	366	13	379	24025	15.2341	0.541103	15.7752
Nrg3_wildtype	Neocortex	CB538	2	304	36	340	24025	12.6535	1.49844	14.1519
Nrg3_wildtype	Neocortex	CB538	3	345	26	371	24025	14.36	1.08221	15.4422
Nrg3_wildtype	Neocortex	CB538	4	321	33	354	24025	13.3611	1.37357	14.7347
Nrg3_wildtype	Neocortex	CB538	5	275	32	307	24025	11.4464	1.33195	12.7784
Nrg3_wildtype	Neocortex	CB538	6	360	23	383	24025	14.9844	0.957336	15.9417
Nrg3_wildtype	Neocortex	CB538	7	316	37	353	24025	13.153	1.54006	14.693
Nrg3_wildtype	Neocortex	CB538	8	361	25	386	24025	15.026	1.04058	16.0666
Nrg3_wildtype	Neocortex	CB538	9	331	23	354	24025	13.7773	0.957336	14.7347
Nrg3_wildtype	Neocortex	CB538	10	338	16	354	24025	14.0687	0.665973	14.7347
Nrg3_wildtype	Neocortex	CB538	11	313	30	343	24025	13.0281	1.2487	14.2768
Nrg3_wildtype	Neocortex	CB538	12	312	34	346	24025	12.9865	1.41519	14.4017
Nrg3_mutant	Neocortex	CB540	1	75	9	84	24025	3.12175	0.37461	3.49636
Nrg3_mutant	Neocortex	CB540	2	55	11	66	24025	2.28928	0.457856	2.74714
Nrg3_mutant	Neocortex	CB540	3	70	20	90	24025	2.91363	0.832466	3.7461
Nrg3_mutant	Neocortex	CB540	4	42	11	53	24025	1.74818	0.457856	2.20604
Nrg3_mutant	Neocortex	CB540	5	37	5	42	24025	1.54006	0.208117	1.74818
Nrg3_mutant	Neocortex	CB540	6	55	7	62	24025	2.28928	0.291363	2.58065
Nrg3_mutant	Neocortex	CB540	7	62	7	69	24025	2.58065	0.291363	2.87201
Nrg3_mutant	Neocortex	CB540	8	45	11	56	24025	1.87305	0.457856	2.33091
Nrg3_mutant	Neocortex	CB540	9	50	7	57	24025	2.08117	0.291363	2.37253
Nrg3_mutant	Neocortex	CB540	10	29	5	34	24025	1.20708	0.208117	1.41519
Nrg3_mutant	Neocortex	CB540	11	38	5	43	24025	1.58169	0.208117	1.7898
Nrg3_mutant	Neocortex	CB540	12	36	2	38	24025	1.49844	0.0832466	1.58169
Nrg3_wildtype	Neocortex	CB539	1	306	30	336	24025	12.7367	1.2487	13.9854
Nrg3_wildtype	Neocortex	CB539	2	224	76	300	24025	9.32362	3.16337	12.487
Nrg3_wildtype	Neocortex	CB539	3	262	64	326	24025	10.9053	2.66389	13.5692
Nrg3_wildtype	Neocortex	CB539	4	248	56	304	24025	10.3226	2.33091	12.6535
Nrg3_wildtype	Neocortex	CB539	5	296	34	330	24025	12.3205	1.41519	13.7357
Nrg3_wildtype	Neocortex	CB539	6	319	27	346	24025	13.2778	1.12383	14.4017
Nrg3_wildtype	Neocortex	CB539	7	320	69	389	24025	13.3195	2.87201	16.1915
Nrg3_wildtype	Neocortex	CB539	8	308	28	336	24025	12.82	1.16545	13.9854
Nrg3_wildtype	Neocortex	CB539	9	295	41	336	24025	12.2789	1.70656	13.9854
Nrg3_wildtype	Neocortex	CB539	10	207	56	263	24025	8.61602	2.33091	10.9469
Nrg3_wildtype	Neocortex	CB539	11	290	50	340	24025	12.0708	2.08117	14.1519
Nrg3_wildtype	Neocortex	CB539	12	337	36	373	24025	14.0271	1.49844	15.5255
Nrg3_wildtype	Neocortex	CB541	1	282	34	316	24025	11.7378	1.41519	13.153
Nrg3_wildtype	Neocortex	CB541	2	259	49	308	24025	10.7804	2.03954	12.82
Nrg3_wildtype	Neocortex	CB541	3	299	46	345	24025	12.4454	1.91467	14.36
Nrg3_wildtype	Neocortex	CB541	4	275	57	332	24025	11.4464	2.37253	13.8189
Nrg3_wildtype	Neocortex	CB541	5	305	38	343	24025	12.6951	1.58169	14.2768
Nrg3_wildtype	Neocortex	CB541	6	254	59	313	24025	10.5723	2.45578	13.0281
Nrg3_wildtype	Neocortex	CB541	7	293	53	346	24025	12.1956	2.20604	14.4017
Nrg3_wildtype	Neocortex	CB541	8	236	46	282	24025	9.8231	1.91467	11.7378
Nrg3_wildtype	Neocortex	CB541	9	284	29	313	24025	11.821	1.20708	13.0281
Nrg3_wildtype	Neocortex	CB541	10	319	28	347	24025	13.2778	1.16545	14.4433
Nrg3_wildtype	Neocortex	CB541	11	280	25	305	24025	11.6545	1.04058	12.6951
Nrg3_wildtype	Neocortex	CB541	12	310	43	353	24025	12.9032	1.7898	14.693
Nrg3_mutant	Neocortex	CB542	1	73	40	113	24025	3.0385	1.66493	4.70343
Nrg3_mutant	Neocortex	CB542	2	52	20	72	24025	2.16441	0.832466	2.99688
Nrg3_mutant	Neocortex	CB542	3	62	14	76	24025	2.58065	0.582726	3.16337
Nrg3_mutant	Neocortex	CB542	4	55	24	79	24025	2.28928	0.998959	3.28824
Nrg3_mutant	Neocortex	CB542	5	41	30	71	24025	1.70656	1.2487	2.95525
Nrg3_mutant	Neocortex	CB542	6	36	17	53	24025	1.49844	0.707596	2.20604
Nrg3_mutant	Neocortex	CB542	7	35	13	48	24025	1.45682	0.541103	1.99792
Nrg3_mutant	Neocortex	CB542	8	35	13	48	24025	1.45682	0.541103	1.99792
Nrg3_mutant	Neocortex	CB542	9	37	13	50	24025	1.54006	0.541103	2.08117
Nrg3_mutant	Neocortex	CB542	10	49	22	71	24025	2.03954	0.915713	2.95525
Nrg3_mutant	Neocortex	CB542	11	28	11	39	24025	1.16545	0.457856	1.62331
Nrg3_mutant	Neocortex	CB542	12	23	13	36	24025	0.957336	0.541103	1.49844
Nrg3_mutant	Hippocampus	CB532	1	72	11	83	24025	2.99688	0.457856	3.45473
Nrg3_mutant	Hippocampus	CB532	2	67	7	74	24025	2.78876	0.291363	3.08012
Nrg3_mutant	Hippocampus	CB532	3	78	5	83	24025	3.24662	0.208117	3.45473
Nrg3_mutant	Hippocampus	CB532	4	59	3	62	24025	2.45578	0.12487	2.58065
Nrg3_mutant	Hippocampus	CB532	5	62	4	66	24025	2.58065	0.166493	2.74714
Nrg3_mutant	Hippocampus	CB532	6	60	7	67	24025	2.4974	0.291363	2.78876
Nrg3_mutant	Hippocampus	CB532	7	66	3	69	24025	2.74714	0.12487	2.87201
Nrg3_mutant	Hippocampus	CB532	8	61	8	69	24025	2.53902	0.332986	2.87201
Nrg3_mutant	Hippocampus	CB532	9	73	3	76	24025	3.0385	0.12487	3.16337
Nrg3_mutant	Hippocampus	CB532	10	58	8	66	24025	2.41415	0.332986	2.74714
Nrg3_mutant	Hippocampus	CB532	11	61	5	66	24025	2.53902	0.208117	2.74714
Nrg3_mutant	Hippocampus	CB532	12	61	4	65	24025	2.53902	0.166493	2.70552
Nrg3_wildtype	Hippocampus	CB538	1	233	27	260	24025	9.69823	1.12383	10.8221
Nrg3_wildtype	Hippocampus	CB538	2	211	47	258	24025	8.78252	1.9563	10.7388
Nrg3_wildtype	Hippocampus	CB538	3	239	35	274	24025	9.94797	1.45682	11.4048
Nrg3_wildtype	Hippocampus	CB538	4	218	25	243	24025	9.07388	1.04058	10.1145
Nrg3_wildtype	Hippocampus	CB538	5	249	27	276	24025	10.3642	1.12383	11.488
Nrg3_wildtype	Hippocampus	CB538	6	265	37	302	24025	11.0302	1.54006	12.5702
Nrg3_wildtype	Hippocampus	CB538	7	179	63	242	24025	7.45057	2.62227	10.0728
Nrg3_wildtype	Hippocampus	CB538	8	245	38	283	24025	10.1977	1.58169	11.7794
Nrg3_wildtype	Hippocampus	CB538	9	264	33	297	24025	10.9886	1.37357	12.3621
Nrg3_wildtype	Hippocampus	CB538	10	242	55	297	24025	10.0728	2.28928	12.3621
Nrg3_wildtype	Hippocampus	CB538	11	225	49	274	24025	9.36524	2.03954	11.4048
Nrg3_wildtype	Hippocampus	CB538	12	277	52	329	24025	11.5297	2.16441	13.6941
Nrg3_mutant	Hippocampus	CB540	1	60	2	62	24025	2.4974	0.0832466	2.58065
Nrg3_mutant	Hippocampus	CB540	2	70	9	79	24025	2.91363	0.37461	3.28824
Nrg3_mutant	Hippocampus	CB540	3	82	2	84	24025	3.41311	0.0832466	3.49636
Nrg3_mutant	Hippocampus	CB540	4	79	2	81	24025	3.28824	0.0832466	3.37149
Nrg3_mutant	Hippocampus	CB540	5	69	2	71	24025	2.87201	0.0832466	2.95525
Nrg3_mutant	Hippocampus	CB540	6	70	4	74	24025	2.91363	0.166493	3.08012
Nrg3_mutant	Hippocampus	CB540	7	49	8	57	24025	2.03954	0.332986	2.37253
Nrg3_mutant	Hippocampus	CB540	8	38	7	45	24025	1.58169	0.291363	1.87305
Nrg3_mutant	Hippocampus	CB540	9	58	4	62	24025	2.41415	0.166493	2.58065
Nrg3_mutant	Hippocampus	CB540	10	57	8	65	24025	2.37253	0.332986	2.70552
Nrg3_mutant	Hippocampus	CB540	11	59	6	65	24025	2.45578	0.24974	2.70552
Nrg3_mutant	Hippocampus	CB540	12	60	9	69	24025	2.4974	0.37461	2.87201
Nrg3_wildtype	Hippocampus	CB539	1	274	52	326	24025	11.4048	2.16441	13.5692
Nrg3_wildtype	Hippocampus	CB539	2	245	66	311	24025	10.1977	2.74714	12.9448
Nrg3_wildtype	Hippocampus	CB539	3	261	49	310	24025	10.8637	2.03954	12.9032
Nrg3_wildtype	Hippocampus	CB539	4	267	53	320	24025	11.1134	2.20604	13.3195
Nrg3_wildtype	Hippocampus	CB539	5	225	76	301	24025	9.36524	3.16337	12.5286
Nrg3_wildtype	Hippocampus	CB539	6	232	53	285	24025	9.65661	2.20604	11.8626
Nrg3_wildtype	Hippocampus	CB539	7	241	61	302	24025	10.0312	2.53902	12.5702
Nrg3_wildtype	Hippocampus	CB539	8	267	36	303	24025	11.1134	1.49844	12.6119
Nrg3_wildtype	Hippocampus	CB539	9	280	46	326	24025	11.6545	1.91467	13.5692
Nrg3_wildtype	Hippocampus	CB539	10	281	44	325	24025	11.6961	1.83143	13.5276
Nrg3_wildtype	Hippocampus	CB539	11	223	61	284	24025	9.282	2.53902	11.821
Nrg3_wildtype	Hippocampus	CB539	12	273	33	306	24025	11.3632	1.37357	12.7367
Nrg3_wildtype	Hippocampus	CB541	1	255	53	308	24025	10.6139	2.20604	12.82
Nrg3_wildtype	Hippocampus	CB541	2	290	39	329	24025	12.0708	1.62331	13.6941
Nrg3_wildtype	Hippocampus	CB541	3	248	44	292	24025	10.3226	1.83143	12.154
Nrg3_wildtype	Hippocampus	CB541	4	268	57	325	24025	11.155	2.37253	13.5276
Nrg3_wildtype	Hippocampus	CB541	5	285	21	306	24025	11.8626	0.874089	12.7367
Nrg3_wildtype	Hippocampus	CB541	6	256	43	299	24025	10.6556	1.7898	12.4454
Nrg3_wildtype	Hippocampus	CB541	7	285	58	343	24025	11.8626	2.41415	14.2768
Nrg3_wildtype	Hippocampus	CB541	8	292	33	325	24025	12.154	1.37357	13.5276
Nrg3_wildtype	Hippocampus	CB541	9	268	38	306	24025	11.155	1.58169	12.7367
Nrg3_wildtype	Hippocampus	CB541	10	242	41	283	24025	10.0728	1.70656	11.7794
Nrg3_wildtype	Hippocampus	CB541	11	248	49	297	24025	10.3226	2.03954	12.3621
Nrg3_wildtype	Hippocampus	CB541	12	237	55	292	24025	9.86472	2.28928	12.154
Nrg3_mutant	Hippocampus	CB542	1	57	8	65	24025	2.37253	0.332986	2.70552
Nrg3_mutant	Hippocampus	CB542	2	44	14	58	24025	1.83143	0.582726	2.41415
Nrg3_mutant	Hippocampus	CB542	3	57	8	65	24025	2.37253	0.332986	2.70552
Nrg3_mutant	Hippocampus	CB542	4	72	3	75	24025	2.99688	0.12487	3.12175
Nrg3_mutant	Hippocampus	CB542	5	68	7	75	24025	2.83039	0.291363	3.12175
Nrg3_mutant	Hippocampus	CB542	6	60	5	65	24025	2.4974	0.208117	2.70552
Nrg3_mutant	Hippocampus	CB542	7	44	12	56	24025	1.83143	0.49948	2.33091
Nrg3_mutant	Hippocampus	CB542	8	54	7	61	24025	2.24766	0.291363	2.53902
Nrg3_mutant	Hippocampus	CB542	9	35	10	45	24025	1.45682	0.416233	1.87305
Nrg3_mutant	Hippocampus	CB542	10	41	18	59	24025	1.70656	0.74922	2.45578
Nrg3_mutant	Hippocampus	CB542	11	41	10	51	24025	1.70656	0.416233	2.12279
Nrg3_mutant	Hippocampus	CB542	12	55	7	62	24025	2.28928	0.291363	2.58065
