# Supplementary material for: Subcellular sorting of neuregulins controls the assembly of excitatory-inhibitory cortical circuits
Source: eLife. 2020 Dec 15;9:e57000. doi: 10.7554/eLife.57000 (PMC7755390; doi:10.7554/eLife.57000)
Supplement: Figure 3—figure supplement 3—source data 1. [file elife-57000-fig3-figsupp3-data1.xlsx]

## Sheet: HA_GAD65_GFPsoma
Plasmid	Brain	Cell	Count_gad65	Count_gad65_ha	Perimeter_cell	Density_gad65	Density_gad65_ha	Proportion_ha_gad65
pSyn_Nrg1_pSyn_Gfp	DN185	1	3	2	46.208	0.0649238	0.0432825	0.666667
pSyn_Nrg1_pSyn_Gfp	DN185	2	10	6	47.572	0.210208	0.126125	0.6
pSyn_Nrg1_pSyn_Gfp	DN185	3	10	2	49.884	0.200465	0.040093	0.2
pSyn_Nrg1_pSyn_Gfp	DN185	4	3	2	43.349	0.0692057	0.0461372	0.666667
pSyn_Nrg1_pSyn_Gfp	DN186	1	10	5	44.939	0.222524	0.111262	0.5
pSyn_Nrg1_pSyn_Gfp	DN186	2	16	5	50.303	0.318072	0.0993977	0.3125
pSyn_Nrg1_pSyn_Gfp	DN186	3	12	5	42.806	0.280335	0.116806	0.416667
pSyn_Nrg1_pSyn_Gfp	DN186	4	17	8	36.446	0.466444	0.219503	0.470588
pSyn_Nrg1_pSyn_Gfp	DN186	5	15	14	49.685	0.301902	0.281775	0.933333
pSyn_Nrg1_pSyn_Gfp	DN186	6	16	15	42.359	0.377724	0.354116	0.9375
pSyn_Nrg1_pSyn_Gfp	DN186	7	9	4	35.245	0.255355	0.113491	0.444444
pSyn_Nrg1_pSyn_Gfp	DN186	8	16	10	40.158	0.398426	0.249016	0.625
pSyn_Nrg1_pSyn_Gfp	DN186	9	21	17	51.951	0.404227	0.327231	0.809524
pSyn_Nrg1_pSyn_Gfp	DN186	10	18	11	45.233	0.39794	0.243185	0.611111
pSyn_Nrg1_pSyn_Gfp	DN186	11	10	5	41.836	0.239029	0.119514	0.5
pSyn_Nrg1_pSyn_Gfp	DN186	12	12	2	56.18	0.213599	0.0355999	0.166667
pSyn_Nrg1_pSyn_Gfp	DN190	1	11	8	46.938	0.234352	0.170438	0.727273
pSyn_Nrg1_pSyn_Gfp	DN190	2	12	9	44.222	0.271358	0.203519	0.75
pSyn_Nrg1_pSyn_Gfp	DN190	3	16	16	47.229	0.338775	0.338775	1
pSyn_Nrg1_pSyn_Gfp	DN190	4	16	12	51.952	0.307977	0.230982	0.75
pSyn_Nrg1_pSyn_Gfp	DN190	5	11	7	36.721	0.299556	0.190627	0.636364
pSyn_Nrg1_pSyn_Gfp	DN190	6	18	11	47.805	0.37653	0.230101	0.611111
pSyn_Nrg1_pSyn_Gfp	DN190	7	10	6	44.508	0.224679	0.134807	0.6
pSyn_Nrg1_pSyn_Gfp	DN190	8	13	3	43.171	0.301128	0.0694911	0.230769
pSyn_Nrg1_pSyn_Gfp	DN193	1	16	5	33.746	0.47413	0.148166	0.3125
pSyn_Nrg1_pSyn_Gfp	DN193	2	8	8	32.991	0.24249	0.24249	1
pSyn_Nrg1_pSyn_Gfp	DN193	3	14	9	41.781	0.335081	0.215409	0.642857
pSyn_Nrg1_pSyn_Gfp	DN193	4	12	11	44.109	0.272053	0.249382	0.916667
pSyn_Nrg1_pSyn_Gfp	DN193	5	5	4	31.82	0.157134	0.125707	0.8
pSyn_Nrg1_pSyn_Gfp	DN193	6	12	7	35.899	0.334271	0.194992	0.583333
pSyn_Nrg1_pSyn_Gfp	DN193	7	15	7	45.08	0.332742	0.15528	0.466667
pSyn_Nrg1_pSyn_Gfp	DN193	8	11	3	44.515	0.247108	0.067393	0.272727
pSyn_Nrg1_pSyn_Gfp	DN193	9	8	8	49.85	0.160481	0.160481	1
pSyn_Nrg1_pSyn_Gfp	DN193	10	17	13	49.836	0.341119	0.260856	0.764706
pSyn_Nrg3_pSyn_Gfp	DN194	1	19	0	46.661	0.407192	0	0
pSyn_Nrg3_pSyn_Gfp	DN194	2	19	1	44.822	0.423899	0.0223105	0.0526316
pSyn_Nrg3_pSyn_Gfp	DN194	3	12	1	36.579	0.328057	0.0273381	0.0833333
pSyn_Nrg3_pSyn_Gfp	DN194	4	12	2	45.685	0.262668	0.043778	0.166667
pSyn_Nrg3_pSyn_Gfp	DN194	5	17	0	41.204	0.412581	0	0
pSyn_Nrg3_pSyn_Gfp	DN194	6	23	1	49.578	0.463915	0.0201702	0.0434783
pSyn_Nrg3_pSyn_Gfp	DN194	7	16	0	46.89	0.341224	0	0
pSyn_Nrg3_pSyn_Gfp	DN194	8	12	1	44.659	0.268703	0.0223919	0.0833333
pSyn_Nrg3_pSyn_Gfp	DN195	1	14	0	48.872	0.286463	0	0
pSyn_Nrg3_pSyn_Gfp	DN195	2	23	2	47.348	0.485765	0.0422404	0.0869565
pSyn_Nrg3_pSyn_Gfp	DN195	3	17	0	46.683	0.364158	0	0
pSyn_Nrg3_pSyn_Gfp	DN195	4	23	0	43.263	0.531632	0	0
pSyn_Nrg3_pSyn_Gfp	DN195	5	31	0	55.422	0.559345	0	0
pSyn_Nrg3_pSyn_Gfp	DN195	6	25	1	56.124	0.445442	0.0178177	0.04
pSyn_Nrg3_pSyn_Gfp	DN195	7	16	0	39.808	0.401929	0	0
pSyn_Nrg3_pSyn_Gfp	DN195	8	23	0	42.715	0.538453	0	0
pSyn_Nrg3_pSyn_Gfp	DN196	1	12	0	36.812	0.325981	0	0
pSyn_Nrg3_pSyn_Gfp	DN196	2	21	1	52.086	0.403179	0.019199	0.047619
pSyn_Nrg3_pSyn_Gfp	DN196	3	19	0	45.132	0.420987	0	0
pSyn_Nrg3_pSyn_Gfp	DN196	4	9	0	38.874	0.231517	0	0
pSyn_Nrg3_pSyn_Gfp	DN196	5	14	0	48.401	0.28925	0	0
pSyn_Nrg3_pSyn_Gfp	DN196	6	20	1	53.77	0.371955	0.0185977	0.05
pSyn_Nrg3_pSyn_Gfp	DN196	7	15	0	41.8	0.358852	0	0
pSyn_Nrg3_pSyn_Gfp	DN196	8	21	0	48.317	0.43463	0	0
pSyn_Nrg3_pSyn_Gfp	DN197	1	17	0	42.157	0.403255	0	0
pSyn_Nrg3_pSyn_Gfp	DN197	2	15	0	40.797	0.367674	0	0
pSyn_Nrg3_pSyn_Gfp	DN197	3	27	2	57.44	0.470056	0.0348189	0.0740741
pSyn_Nrg3_pSyn_Gfp	DN197	4	23	0	38.759	0.593411	0	0
pSyn_Nrg3_pSyn_Gfp	DN197	5	20	3	52.477	0.381119	0.0571679	0.15
pSyn_Nrg3_pSyn_Gfp	DN197	6	26	0	51.914	0.500828	0	0
pSyn_Nrg3_pSyn_Gfp	DN197	7	25	1	53.627	0.466183	0.0186473	0.04
pSyn_Nrg3_pSyn_Gfp	DN197	8	18	0	53.405	0.337047	0	0

## Sheet: HA_GAD65_NeuNsoma
Plasmid	Brain	Cell	Count_gad65	Count_gad65_ha	Perimeter_cell	Density_gad65	Density_gad65_ha	Proportion_ha_gad65
pSyn_Nrg1_pSyn_Gfp	DN185	1	11	0	53.533	0.205481	0	0
pSyn_Nrg1_pSyn_Gfp	DN185	2	25	0	58.591	0.426687	0	0
pSyn_Nrg1_pSyn_Gfp	DN185	3	15	0	51.259	0.292632	0	0
pSyn_Nrg1_pSyn_Gfp	DN185	4	17	0	52.548	0.323514	0	0
pSyn_Nrg1_pSyn_Gfp	DN185	5	17	0	50.683	0.335418	0	0
pSyn_Nrg1_pSyn_Gfp	DN185	6	12	0	53.38	0.224803	0	0
pSyn_Nrg1_pSyn_Gfp	DN185	7	12	0	54.074	0.221918	0	0
pSyn_Nrg1_pSyn_Gfp	DN185	8	20	1	60.356	0.331367	0.0165684	0.05
pSyn_Nrg1_pSyn_Gfp	DN186	1	14	0	48.253	0.290137	0	0
pSyn_Nrg1_pSyn_Gfp	DN186	2	13	0	52.181	0.249133	0	0
pSyn_Nrg1_pSyn_Gfp	DN186	3	12	1	49.216	0.243823	0.0203186	0.0833333
pSyn_Nrg1_pSyn_Gfp	DN186	4	16	0	47.32	0.338123	0	0
pSyn_Nrg1_pSyn_Gfp	DN186	5	16	0	56.614	0.282616	0	0
pSyn_Nrg1_pSyn_Gfp	DN186	6	16	0	54.8	0.291971	0	0
pSyn_Nrg1_pSyn_Gfp	DN186	7	10	0	50.618	0.197558	0	0
pSyn_Nrg1_pSyn_Gfp	DN186	8	17	0	46.027	0.369348	0	0
pSyn_Nrg1_pSyn_Gfp	DN190	1	15	0	51.781	0.289682	0	0
pSyn_Nrg1_pSyn_Gfp	DN190	2	22	0	59.938	0.367046	0	0
pSyn_Nrg1_pSyn_Gfp	DN190	3	16	0	58.411	0.273921	0	0
pSyn_Nrg1_pSyn_Gfp	DN190	4	16	0	48.942	0.326918	0	0
pSyn_Nrg1_pSyn_Gfp	DN190	5	11	0	49.481	0.222308	0	0
pSyn_Nrg1_pSyn_Gfp	DN190	6	26	0	53.679	0.484361	0	0
pSyn_Nrg1_pSyn_Gfp	DN190	7	15	0	50.055	0.29967	0	0
pSyn_Nrg1_pSyn_Gfp	DN190	8	18	0	46.881	0.383951	0	0
pSyn_Nrg1_pSyn_Gfp	DN193	1	14	0	48.439	0.289023	0	0
pSyn_Nrg1_pSyn_Gfp	DN193	2	10	0	42.828	0.233492	0	0
pSyn_Nrg1_pSyn_Gfp	DN193	3	12	0	44.698	0.268468	0	0
pSyn_Nrg1_pSyn_Gfp	DN193	4	13	2	57.083	0.227739	0.0350367	0.153846
pSyn_Nrg1_pSyn_Gfp	DN193	5	18	0	50.849	0.353989	0	0
pSyn_Nrg1_pSyn_Gfp	DN193	6	16	0	55.268	0.289498	0	0
pSyn_Nrg1_pSyn_Gfp	DN193	7	9	1	46.252	0.194586	0.0216207	0.111111
pSyn_Nrg1_pSyn_Gfp	DN193	8	18	0	53.222	0.338206	0	0
pSyn_Nrg3_pSyn_Gfp	DN194	1	16	0	35.832	0.446528	0	0
pSyn_Nrg3_pSyn_Gfp	DN194	2	10	0	44.692	0.223754	0	0
pSyn_Nrg3_pSyn_Gfp	DN194	3	17	0	48.002	0.354152	0	0
pSyn_Nrg3_pSyn_Gfp	DN194	4	15	0	46.196	0.324703	0	0
pSyn_Nrg3_pSyn_Gfp	DN194	5	15	0	46.242	0.32438	0	0
pSyn_Nrg3_pSyn_Gfp	DN194	6	14	0	49.159	0.28479	0	0
pSyn_Nrg3_pSyn_Gfp	DN194	7	17	1	48.066	0.35368	0.0208047	0.0588235
pSyn_Nrg3_pSyn_Gfp	DN194	8	19	0	50.062	0.379529	0	0
pSyn_Nrg3_pSyn_Gfp	DN195	1	13	0	38.794	0.335103	0	0
pSyn_Nrg3_pSyn_Gfp	DN195	2	25	1	52.411	0.476999	0.01908	0.04
pSyn_Nrg3_pSyn_Gfp	DN195	3	13	1	47.739	0.272314	0.0209472	0.0769231
pSyn_Nrg3_pSyn_Gfp	DN195	4	12	0	61.581	0.194865	0	0
pSyn_Nrg3_pSyn_Gfp	DN195	5	16	0	46.279	0.345729	0	0
pSyn_Nrg3_pSyn_Gfp	DN195	6	11	1	40.628	0.270749	0.0246136	0.0909091
pSyn_Nrg3_pSyn_Gfp	DN195	7	14	0	69	0.202899	0	0
pSyn_Nrg3_pSyn_Gfp	DN195	8	15	0	45.966	0.326328	0	0
pSyn_Nrg3_pSyn_Gfp	DN196	1	9	0	47.526	0.18937	0	0
pSyn_Nrg3_pSyn_Gfp	DN196	2	9	0	44.679	0.201437	0	0
pSyn_Nrg3_pSyn_Gfp	DN196	3	15	0	52.003	0.288445	0	0
pSyn_Nrg3_pSyn_Gfp	DN196	4	16	0	49.14	0.3256	0	0
pSyn_Nrg3_pSyn_Gfp	DN196	5	6	0	34.82	0.172315	0	0
pSyn_Nrg3_pSyn_Gfp	DN196	6	11	0	51.401	0.214004	0	0
pSyn_Nrg3_pSyn_Gfp	DN196	7	9	0	46.528	0.193432	0	0
pSyn_Nrg3_pSyn_Gfp	DN196	8	8	0	40.191	0.19905	0	0
pSyn_Nrg3_pSyn_Gfp	DN197	1	16	2	43.887	0.364573	0.0455716	0.125
pSyn_Nrg3_pSyn_Gfp	DN197	2	16	1	50.364	0.317687	0.0198555	0.0625
pSyn_Nrg3_pSyn_Gfp	DN197	3	15	0	55.856	0.268548	0	0
pSyn_Nrg3_pSyn_Gfp	DN197	4	12	0	43.413	0.276415	0	0
pSyn_Nrg3_pSyn_Gfp	DN197	5	21	0	51.002	0.411749	0	0
pSyn_Nrg3_pSyn_Gfp	DN197	6	13	0	44.173	0.294297	0	0
pSyn_Nrg3_pSyn_Gfp	DN197	7	23	0	45.298	0.507749	0	0
pSyn_Nrg3_pSyn_Gfp	DN197	8	20	0	46.838	0.427004	0	0
