# Supplementary material for: Subcellular sorting of neuregulins controls the assembly of excitatory-inhibitory cortical circuits
Source: eLife. 2020 Dec 15;9:e57000. doi: 10.7554/eLife.57000 (PMC7755390; doi:10.7554/eLife.57000)
Supplement: Figure 3—figure supplement 4—source data 1. [file elife-57000-fig3-figsupp4-data1.xlsx]

## Sheet: HA_VGlut1_GFP_PVsoma
Plasmid	Brain	Cell	Count_vglut1_gfp	Count_ha_vglut_gfp	Perimeter_cell	Density_vglut1_gfp	Density_ha_vglut1_gfp	Proportion_ha_vglut1_gfp
pSyn_Nrg1_pSyn_Gfp	DN184	1	14	0	45.419	0.308241	0	0
pSyn_Nrg1_pSyn_Gfp	DN184	2	12	1	42.981	0.279193	0.0232661	0.0833333
pSyn_Nrg1_pSyn_Gfp	DN184	3	25	1	61.751	0.404852	0.0161941	0.04
pSyn_Nrg1_pSyn_Gfp	DN184	4	13	1	62.131	0.209235	0.016095	0.0769231
pSyn_Nrg1_pSyn_Gfp	DN184	5	16	1	47.616	0.336022	0.0210013	0.0625
pSyn_Nrg1_pSyn_Gfp	DN184	6	21	0	43.257	0.485471	0	0
pSyn_Nrg1_pSyn_Gfp	DN184	7	29	2	61.256	0.473423	0.0326499	0.0689655
pSyn_Nrg1_pSyn_Gfp	DN184	8	15	1	49.551	0.302718	0.0201812	0.0666667
pSyn_Nrg1_pSyn_Gfp	DN184	9	15	0	49.768	0.301398	0	0
pSyn_Nrg1_pSyn_Gfp	DN184	10	11	0	49.153	0.223791	0	0
pSyn_Nrg1_pSyn_Gfp	DN185	1	13	0	52.776	0.246324	0	0
pSyn_Nrg1_pSyn_Gfp	DN185	2	10	0	44.295	0.225759	0	0
pSyn_Nrg1_pSyn_Gfp	DN185	3	25	1	53.676	0.465758	0.0186303	0.04
pSyn_Nrg1_pSyn_Gfp	DN185	4	16	0	36.967	0.432818	0	0
pSyn_Nrg1_pSyn_Gfp	DN185	5	13	2	46.993	0.276637	0.0425595	0.153846
pSyn_Nrg1_pSyn_Gfp	DN185	6	15	0	51.297	0.292415	0	0
pSyn_Nrg1_pSyn_Gfp	DN185	7	9	0	45.281	0.198759	0	0
pSyn_Nrg1_pSyn_Gfp	DN185	8	33	2	65.967	0.50025	0.0303182	0.0606061
pSyn_Nrg1_pSyn_Gfp	DN185	9	16	0	53.142	0.30108	0	0
pSyn_Nrg1_pSyn_Gfp	DN185	10	34	1	54.595	0.622768	0.0183167	0.0294118
pSyn_Nrg1_pSyn_Gfp	DN186	1	30	0	54.171	0.553802	0	0
pSyn_Nrg1_pSyn_Gfp	DN186	2	8	0	58.714	0.136254	0	0
pSyn_Nrg1_pSyn_Gfp	DN186	3	22	2	53.231	0.413293	0.0375721	0.0909091
pSyn_Nrg1_pSyn_Gfp	DN186	4	17	0	50.85	0.334317	0	0
pSyn_Nrg1_pSyn_Gfp	DN186	5	29	1	55.149	0.525848	0.0181327	0.0344828
pSyn_Nrg1_pSyn_Gfp	DN186	6	20	4	56.326	0.355076	0.0710152	0.2
pSyn_Nrg1_pSyn_Gfp	DN186	7	19	2	56.435	0.336671	0.035439	0.105263
pSyn_Nrg1_pSyn_Gfp	DN186	8	18	0	58.256	0.308981	0	0
pSyn_Nrg1_pSyn_Gfp	DN186	9	17	0	56.745	0.299586	0	0
pSyn_Nrg1_pSyn_Gfp	DN186	10	24	3	60.875	0.394251	0.0492813	0.125
pSyn_Nrg1_pSyn_Gfp	DN190	1	15	0	50.707	0.295817	0	0
pSyn_Nrg1_pSyn_Gfp	DN190	2	14	1	55.644	0.251599	0.0179714	0.0714286
pSyn_Nrg1_pSyn_Gfp	DN190	3	16	1	46.362	0.34511	0.0215694	0.0625
pSyn_Nrg1_pSyn_Gfp	DN190	4	13	0	56.729	0.22916	0	0
pSyn_Nrg1_pSyn_Gfp	DN190	5	14	0	60.682	0.230711	0	0
pSyn_Nrg1_pSyn_Gfp	DN190	6	16	0	61.437	0.260429	0	0
pSyn_Nrg1_pSyn_Gfp	DN190	7	18	0	64.758	0.277958	0	0
pSyn_Nrg1_pSyn_Gfp	DN190	8	9	1	53.843	0.167153	0.0185725	0.111111
pSyn_Nrg1_pSyn_Gfp	DN190	9	20	2	51.71	0.386772	0.0386772	0.1
pSyn_Nrg1_pSyn_Gfp	DN190	10	16	0	41.989	0.381052	0	0
pSyn_Nrg3_pSyn_Gfp	DN194	1	23	12	52.972	0.434192	0.226535	0.521739
pSyn_Nrg3_pSyn_Gfp	DN194	2	19	11	56.787	0.334584	0.193706	0.578947
pSyn_Nrg3_pSyn_Gfp	DN194	3	16	13	48.039	0.333063	0.270613	0.8125
pSyn_Nrg3_pSyn_Gfp	DN194	4	19	10	53.792	0.353212	0.185901	0.526316
pSyn_Nrg3_pSyn_Gfp	DN194	5	25	15	45.755	0.546388	0.327833	0.6
pSyn_Nrg3_pSyn_Gfp	DN194	6	28	23	53.289	0.525437	0.431609	0.821429
pSyn_Nrg3_pSyn_Gfp	DN194	7	37	24	51.963	0.712045	0.461867	0.648649
pSyn_Nrg3_pSyn_Gfp	DN194	8	28	21	61.965	0.451868	0.338901	0.75
pSyn_Nrg3_pSyn_Gfp	DN194	9	32	31	63.788	0.501662	0.485985	0.96875
pSyn_Nrg3_pSyn_Gfp	DN194	10	26	21	54.661	0.475659	0.384186	0.807692
pSyn_Nrg3_pSyn_Gfp	DN194	11	10	7	42.983	0.23265	0.162855	0.7
pSyn_Nrg3_pSyn_Gfp	DN194	12	21	15	48.445	0.433481	0.309629	0.714286
pSyn_Nrg3_pSyn_Gfp	DN195	1	18	10	60.193	0.299038	0.166132	0.555556
pSyn_Nrg3_pSyn_Gfp	DN195	2	22	21	67.275	0.327016	0.312152	0.954545
pSyn_Nrg3_pSyn_Gfp	DN195	3	29	24	54.011	0.536928	0.444354	0.827586
pSyn_Nrg3_pSyn_Gfp	DN195	4	28	18	52.48	0.533537	0.342988	0.642857
pSyn_Nrg3_pSyn_Gfp	DN195	5	31	22	67.043	0.46239	0.328148	0.709677
pSyn_Nrg3_pSyn_Gfp	DN195	6	23	17	51.267	0.448632	0.331597	0.73913
pSyn_Nrg3_pSyn_Gfp	DN195	7	20	13	49.655	0.402779	0.261806	0.65
pSyn_Nrg3_pSyn_Gfp	DN195	8	20	11	44.582	0.448612	0.246736	0.55
pSyn_Nrg3_pSyn_Gfp	DN195	9	26	18	75.448	0.344608	0.238575	0.692308
pSyn_Nrg3_pSyn_Gfp	DN195	10	28	21	54.807	0.510884	0.383163	0.75
pSyn_Nrg3_pSyn_Gfp	DN195	11	25	13	62.115	0.402479	0.209289	0.52
pSyn_Nrg3_pSyn_Gfp	DN195	12	12	7	48.216	0.24888	0.14518	0.583333
pSyn_Nrg3_pSyn_Gfp	DN195	13	19	10	59.033	0.321854	0.169397	0.526316
pSyn_Nrg3_pSyn_Gfp	DN195	14	19	11	50.988	0.372637	0.215737	0.578947
pSyn_Nrg3_pSyn_Gfp	DN195	15	26	17	49.923	0.520802	0.340524	0.653846
pSyn_Nrg3_pSyn_Gfp	DN195	16	15	11	60.221	0.249083	0.182661	0.733333
pSyn_Nrg3_pSyn_Gfp	DN196	1	16	13	43.948	0.364067	0.295804	0.8125
pSyn_Nrg3_pSyn_Gfp	DN196	2	24	11	58.998	0.406793	0.186447	0.458333
pSyn_Nrg3_pSyn_Gfp	DN196	3	18	12	55.033	0.327076	0.218051	0.666667
pSyn_Nrg3_pSyn_Gfp	DN196	4	28	25	66.628	0.420244	0.375218	0.892857
pSyn_Nrg3_pSyn_Gfp	DN196	5	17	11	49.533	0.343206	0.222074	0.647059
pSyn_Nrg3_pSyn_Gfp	DN196	6	20	15	50.235	0.398129	0.298597	0.75
pSyn_Nrg3_pSyn_Gfp	DN196	7	18	14	50.797	0.354352	0.275607	0.777778
pSyn_Nrg3_pSyn_Gfp	DN196	8	20	13	55.067	0.363194	0.236076	0.65
pSyn_Nrg3_pSyn_Gfp	DN196	9	18	8	51.424	0.350031	0.155569	0.444444
pSyn_Nrg3_pSyn_Gfp	DN196	10	21	12	53.994	0.388932	0.222247	0.571429
pSyn_Nrg3_pSyn_Gfp	DN196	11	29	14	50.109	0.578738	0.279391	0.482759
pSyn_Nrg3_pSyn_Gfp	DN196	12	19	12	50.133	0.378992	0.239363	0.631579
pSyn_Nrg3_pSyn_Gfp	DN197	1	26	24	59.786	0.434884	0.401432	0.923077
pSyn_Nrg3_pSyn_Gfp	DN197	2	28	25	55.571	0.50386	0.449875	0.892857
pSyn_Nrg3_pSyn_Gfp	DN197	3	30	27	53.961	0.555957	0.500361	0.9
pSyn_Nrg3_pSyn_Gfp	DN197	4	46	22	66.887	0.687727	0.328913	0.478261
pSyn_Nrg3_pSyn_Gfp	DN197	5	23	15	62.517	0.3679	0.239935	0.652174
pSyn_Nrg3_pSyn_Gfp	DN197	6	16	12	51.39	0.311345	0.233508	0.75
pSyn_Nrg3_pSyn_Gfp	DN197	7	14	7	56.928	0.245925	0.122962	0.5
pSyn_Nrg3_pSyn_Gfp	DN197	8	21	20	50.251	0.417902	0.398002	0.952381
pSyn_Nrg3_pSyn_Gfp	DN197	9	15	8	63.911	0.234701	0.125174	0.533333
pSyn_Nrg3_pSyn_Gfp	DN197	10	17	11	46.962	0.361995	0.234232	0.647059
