# Supplementary material for: Subcellular sorting of neuregulins controls the assembly of excitatory-inhibitory cortical circuits
Source: eLife. 2020 Dec 15;9:e57000. doi: 10.7554/eLife.57000 (PMC7755390; doi:10.7554/eLife.57000)
Supplement: Figure 3—figure supplement 5—source data 1. [file elife-57000-fig3-figsupp5-data1.xlsx]

## Sheet: Sheet1
Plasmid	Brain	ROI	Area_colocalization	Area_GFP	Area_HA	Proportion_colocalization
pSyn_Nrg1_pSyn_Gfp	DN184	1	0.00284	0.13611	0.01093	0.0208655
pSyn_Nrg1_pSyn_Gfp	DN184	2	0.00429	0.18558	0.01186	0.0231167
pSyn_Nrg1_pSyn_Gfp	DN184	3	0.00231	0.18827	0.00605	0.0122696
pSyn_Nrg1_pSyn_Gfp	DN184	4	0.00161	0.09649	0.00878	0.0166857
pSyn_Nrg1_pSyn_Gfp	DN184	5	0.00472	0.19011	0.01238	0.0248277
pSyn_Nrg1_pSyn_Gfp	DN184	6	0.00168	0.10945	0.00741	0.0153495
pSyn_Nrg1_pSyn_Gfp	DN184	7	0.00223	0.11628	0.01244	0.0191778
pSyn_Nrg1_pSyn_Gfp	DN184	8	0.00164	0.11803	0.00782	0.0138948
pSyn_Nrg1_pSyn_Gfp	DN184	9	0.0015	0.08651	0.00651	0.017339
pSyn_Nrg1_pSyn_Gfp	DN185	1	0.00078	0.14544	0.00525	0.00536304
pSyn_Nrg1_pSyn_Gfp	DN185	2	0.00128	0.16332	0.00647	0.00783737
pSyn_Nrg1_pSyn_Gfp	DN185	3	0.00122	0.1625	0.00683	0.00750769
pSyn_Nrg1_pSyn_Gfp	DN185	4	0.00114	0.08472	0.00793	0.0134561
pSyn_Nrg1_pSyn_Gfp	DN185	5	0.00052	0.13051	0.00432	0.00398437
pSyn_Nrg1_pSyn_Gfp	DN185	6	0.00106	0.15712	0.00592	0.00674644
pSyn_Nrg1_pSyn_Gfp	DN185	7	0.00084	0.18793	0.00443	0.00446975
pSyn_Nrg1_pSyn_Gfp	DN185	8	0.00164	0.15919	0.00842	0.0103022
pSyn_Nrg1_pSyn_Gfp	DN185	9	0.00036	0.0722	0.00483	0.00498615
pSyn_Nrg1_pSyn_Gfp	DN186	1	0.00169	0.18557	0.00585	0.00910707
pSyn_Nrg1_pSyn_Gfp	DN186	2	0.00411	0.24675	0.00987	0.0166565
pSyn_Nrg1_pSyn_Gfp	DN186	3	0.00095	0.21032	0.00381	0.00451693
pSyn_Nrg1_pSyn_Gfp	DN186	4	0.00203	0.13645	0.00851	0.0148772
pSyn_Nrg1_pSyn_Gfp	DN186	5	0.00213	0.14354	0.00818	0.0148391
pSyn_Nrg1_pSyn_Gfp	DN186	6	0.00111	0.12587	0.0039	0.00881862
pSyn_Nrg1_pSyn_Gfp	DN186	7	0.00156	0.14298	0.00703	0.0109106
pSyn_Nrg1_pSyn_Gfp	DN186	8	0.0033	0.17737	0.01218	0.0186052
pSyn_Nrg1_pSyn_Gfp	DN186	9	0.00188	0.12592	0.00747	0.0149301
pSyn_Nrg1_pSyn_Gfp	DN190	1	0.00275	0.15287	0.01067	0.0179891
pSyn_Nrg1_pSyn_Gfp	DN190	2	0.00279	0.17357	0.0116	0.0160742
pSyn_Nrg1_pSyn_Gfp	DN190	3	0.00252	0.12123	0.01398	0.0207869
pSyn_Nrg1_pSyn_Gfp	DN190	4	0.00342	0.06593	0.01222	0.0518732
pSyn_Nrg1_pSyn_Gfp	DN190	5	0.00274	0.18956	0.00713	0.0144545
pSyn_Nrg1_pSyn_Gfp	DN190	6	0.00066	0.13818	0.0042	0.00477638
pSyn_Nrg1_pSyn_Gfp	DN190	7	0.00245	0.13667	0.00723	0.0179264
pSyn_Nrg1_pSyn_Gfp	DN190	8	0.00132	0.15799	0.00569	0.00835496
pSyn_Nrg1_pSyn_Gfp	DN190	9	0.0017	0.13429	0.00742	0.0126592
pSyn_Nrg3_pSyn_Gfp	DN194	1	0.03171	0.10223	0.03526	0.310183
pSyn_Nrg3_pSyn_Gfp	DN194	2	0.03288	0.09561	0.03905	0.343897
pSyn_Nrg3_pSyn_Gfp	DN194	3	0.02747	0.08593	0.0318	0.319679
pSyn_Nrg3_pSyn_Gfp	DN194	4	0.03118	0.11093	0.03368	0.281078
pSyn_Nrg3_pSyn_Gfp	DN194	5	0.04379	0.11176	0.04894	0.391822
pSyn_Nrg3_pSyn_Gfp	DN194	6	0.02742	0.13342	0.0294	0.205516
pSyn_Nrg3_pSyn_Gfp	DN194	7	0.02658	0.11417	0.0314	0.232811
pSyn_Nrg3_pSyn_Gfp	DN194	8	0.02707	0.11162	0.03173	0.242519
pSyn_Nrg3_pSyn_Gfp	DN194	9	0.0196	0.10181	0.0235	0.192515
pSyn_Nrg3_pSyn_Gfp	DN195	1	0.02924	0.10245	0.03045	0.285408
pSyn_Nrg3_pSyn_Gfp	DN195	2	0.02773	0.09157	0.02966	0.302828
pSyn_Nrg3_pSyn_Gfp	DN195	3	0.01856	0.09585	0.01978	0.193636
pSyn_Nrg3_pSyn_Gfp	DN195	4	0.03382	0.13474	0.03501	0.251002
pSyn_Nrg3_pSyn_Gfp	DN195	5	0.02643	0.15582	0.02733	0.169619
pSyn_Nrg3_pSyn_Gfp	DN195	6	0.02196	0.13046	0.02426	0.168327
pSyn_Nrg3_pSyn_Gfp	DN195	7	0.02942	0.08365	0.03104	0.351704
pSyn_Nrg3_pSyn_Gfp	DN195	8	0.02207	0.09087	0.02263	0.242874
pSyn_Nrg3_pSyn_Gfp	DN195	9	0.01986	0.08054	0.02544	0.246586
pSyn_Nrg3_pSyn_Gfp	DN196	1	0.02647	0.09015	0.0332	0.293622
pSyn_Nrg3_pSyn_Gfp	DN196	2	0.02568	0.11678	0.00268	0.219901
pSyn_Nrg3_pSyn_Gfp	DN196	3	0.04031	0.12517	0.04195	0.322042
pSyn_Nrg3_pSyn_Gfp	DN196	4	0.03128	0.12701	0.03434	0.24628
pSyn_Nrg3_pSyn_Gfp	DN196	5	0.0378	0.14337	0.04056	0.263653
pSyn_Nrg3_pSyn_Gfp	DN196	6	0.03733	0.11587	0.03979	0.322171
pSyn_Nrg3_pSyn_Gfp	DN196	7	0.02492	0.13235	0.02877	0.188289
pSyn_Nrg3_pSyn_Gfp	DN196	8	0.02932	0.12868	0.03251	0.227852
pSyn_Nrg3_pSyn_Gfp	DN196	9	0.02901	0.12758	0.03198	0.227387
pSyn_Nrg3_pSyn_Gfp	DN197	1	0.02664	0.12928	0.03216	0.206064
pSyn_Nrg3_pSyn_Gfp	DN197	2	0.02461	0.14632	0.0265	0.168193
pSyn_Nrg3_pSyn_Gfp	DN197	3	0.02164	0.11952	0.02398	0.181058
pSyn_Nrg3_pSyn_Gfp	DN197	4	0.02647	0.13484	0.02916	0.196307
pSyn_Nrg3_pSyn_Gfp	DN197	5	0.03398	0.14714	0.03665	0.230937
pSyn_Nrg3_pSyn_Gfp	DN197	6	0.02373	0.11551	0.02677	0.205437
pSyn_Nrg3_pSyn_Gfp	DN197	7	0.01758	0.11115	0.02263	0.158165
pSyn_Nrg3_pSyn_Gfp	DN197	8	0.02787	0.12312	0.03454	0.226365
pSyn_Nrg3_pSyn_Gfp	DN197	9	0.0389	0.19794	0.04042	0.196524
