# Supplementary material for: Subcellular sorting of neuregulins controls the assembly of excitatory-inhibitory cortical circuits
Source: eLife. 2020 Dec 15;9:e57000. doi: 10.7554/eLife.57000 (PMC7755390; doi:10.7554/eLife.57000)
Supplement: Figure 3—figure supplement 5—source data 2. [file elife-57000-fig3-figsupp5-data2.xlsx]

## Sheet: HA_VGlut1_GFP_PVsoma
Plasmid	Brain	Cell	Count_vglut1_gfp	Count_ha_vglut_gfp	Perimeter_cell	Density_vglut1_gfp	Density_ha_vglut1_gfp	Proportion_ha_vglut1_gfp
pSyn_Nrg1_pSyn_Gfp	DN184	1	10	0	54.923	0.182073	0	0
pSyn_Nrg1_pSyn_Gfp	DN184	2	18	0	66.199	0.271907	0	0
pSyn_Nrg1_pSyn_Gfp	DN184	3	18	1	48.549	0.370759	0.0205977	0.0555556
pSyn_Nrg1_pSyn_Gfp	DN184	4	9	0	42.652	0.21101	0	0
pSyn_Nrg1_pSyn_Gfp	DN184	5	24	0	57.944	0.414193	0	0
pSyn_Nrg1_pSyn_Gfp	DN184	6	20	0	55.726	0.358899	0	0
pSyn_Nrg1_pSyn_Gfp	DN184	7	20	1	53.952	0.3707	0.018535	0.05
pSyn_Nrg1_pSyn_Gfp	DN184	8	12	0	54.864	0.218723	0	0
pSyn_Nrg1_pSyn_Gfp	DN184	9	26	3	51.257	0.507248	0.0585286	0.115385
pSyn_Nrg1_pSyn_Gfp	DN184	10	16	4	55.696	0.287274	0.0718184	0.25
pSyn_Nrg1_pSyn_Gfp	DN185	1	17	0	49.896	0.340709	0	0
pSyn_Nrg1_pSyn_Gfp	DN185	2	16	0	48.227	0.331764	0	0
pSyn_Nrg1_pSyn_Gfp	DN185	3	5	0	40.772	0.122633	0	0
pSyn_Nrg1_pSyn_Gfp	DN185	4	10	1	43.776	0.228436	0.0228436	0.1
pSyn_Nrg1_pSyn_Gfp	DN185	5	20	0	40.128	0.498405	0	0
pSyn_Nrg1_pSyn_Gfp	DN185	6	12	1	46.418	0.25852	0.0215434	0.0833333
pSyn_Nrg1_pSyn_Gfp	DN185	7	13	0	53.802	0.241627	0	0
pSyn_Nrg1_pSyn_Gfp	DN185	8	27	2	63.453	0.425512	0.0315194	0.0740741
pSyn_Nrg1_pSyn_Gfp	DN185	9	21	0	56.316	0.372896	0	0
pSyn_Nrg1_pSyn_Gfp	DN185	10	31	0	63.858	0.485452	0	0
pSyn_Nrg1_pSyn_Gfp	DN186	1	14	2	55.622	0.251699	0.035957	0.142857
pSyn_Nrg1_pSyn_Gfp	DN186	2	22	0	54.233	0.405657	0	0
pSyn_Nrg1_pSyn_Gfp	DN186	3	7	0	39.887	0.175496	0	0
pSyn_Nrg1_pSyn_Gfp	DN186	4	11	1	50.724	0.21686	0.0197145	0.0909091
pSyn_Nrg1_pSyn_Gfp	DN186	5	15	2	55.542	0.270066	0.0360088	0.133333
pSyn_Nrg1_pSyn_Gfp	DN186	6	15	0	57.781	0.259601	0	0
pSyn_Nrg1_pSyn_Gfp	DN186	7	24	3	45.995	0.521796	0.0652245	0.125
pSyn_Nrg1_pSyn_Gfp	DN186	8	19	1	62.989	0.30164	0.0158758	0.0526316
pSyn_Nrg1_pSyn_Gfp	DN186	9	21	0	52.772	0.397938	0	0
pSyn_Nrg1_pSyn_Gfp	DN186	10	23	0	48.859	0.470742	0	0
pSyn_Nrg1_pSyn_Gfp	DN190	1	16	0	46.73	0.342392	0	0
pSyn_Nrg1_pSyn_Gfp	DN190	2	12	1	48.615	0.246837	0.0205698	0.0833333
pSyn_Nrg1_pSyn_Gfp	DN190	3	29	0	49.544	0.585338	0	0
pSyn_Nrg1_pSyn_Gfp	DN190	4	17	0	50.188	0.338726	0	0
pSyn_Nrg1_pSyn_Gfp	DN190	5	6	0	46.247	0.129738	0	0
pSyn_Nrg1_pSyn_Gfp	DN190	6	21	2	52.281	0.401676	0.0382548	0.0952381
pSyn_Nrg1_pSyn_Gfp	DN190	7	14	1	45.113	0.310332	0.0221666	0.0714286
pSyn_Nrg1_pSyn_Gfp	DN190	8	15	0	44.933	0.33383	0	0
pSyn_Nrg1_pSyn_Gfp	DN190	9	24	1	57.443	0.417805	0.0174086	0.0416667
pSyn_Nrg1_pSyn_Gfp	DN190	10	12	1	59.862	0.200461	0.0167051	0.0833333
pSyn_Nrg1_pSyn_Gfp	DN190	11	13	1	48.22	0.269598	0.0207383	0.0769231
pSyn_Nrg1_pSyn_Gfp	DN190	12	13	1	53.174	0.24448	0.0188062	0.0769231
pSyn_Nrg3_pSyn_Gfp	DN194	1	12	4	45.206	0.265451	0.0884838	0.333333
pSyn_Nrg3_pSyn_Gfp	DN194	2	23	15	53.817	0.427374	0.278722	0.652174
pSyn_Nrg3_pSyn_Gfp	DN194	3	17	14	72.116	0.235731	0.194132	0.823529
pSyn_Nrg3_pSyn_Gfp	DN194	4	5	3	40.757	0.122678	0.073607	0.6
pSyn_Nrg3_pSyn_Gfp	DN194	5	16	10	48.997	0.326551	0.204094	0.625
pSyn_Nrg3_pSyn_Gfp	DN194	6	18	13	61.51	0.292635	0.211348	0.722222
pSyn_Nrg3_pSyn_Gfp	DN194	7	29	12	53.532	0.541732	0.205485	0.37931
pSyn_Nrg3_pSyn_Gfp	DN194	8	22	8	52.951	0.415478	0.151083	0.363636
pSyn_Nrg3_pSyn_Gfp	DN194	9	31	21	57.195	0.542005	0.367165	0.677419
pSyn_Nrg3_pSyn_Gfp	DN195	1	10	8	48.306	0.207014	0.165611	0.8
pSyn_Nrg3_pSyn_Gfp	DN195	2	19	9	63.414	0.299618	0.141924	0.473684
pSyn_Nrg3_pSyn_Gfp	DN195	3	10	7	69.387	0.144119	0.100883	0.7
pSyn_Nrg3_pSyn_Gfp	DN195	4	16	9	40.954	0.390682	0.219759	0.5625
pSyn_Nrg3_pSyn_Gfp	DN195	5	13	9	53.476	0.2431	0.1683	0.692308
pSyn_Nrg3_pSyn_Gfp	DN195	6	13	4	49.206	0.264195	0.0812909	0.307692
pSyn_Nrg3_pSyn_Gfp	DN195	7	10	6	57.155	0.174963	0.104978	0.6
pSyn_Nrg3_pSyn_Gfp	DN195	8	12	8	54.916	0.218516	0.145677	0.666667
pSyn_Nrg3_pSyn_Gfp	DN196	1	9	5	49.846	0.180556	0.100309	0.555556
pSyn_Nrg3_pSyn_Gfp	DN196	2	16	9	53.297	0.300205	0.168865	0.5625
pSyn_Nrg3_pSyn_Gfp	DN196	3	8	7	53.302	0.150088	0.131327	0.875
pSyn_Nrg3_pSyn_Gfp	DN196	4	22	13	37.42	0.587921	0.347408	0.590909
pSyn_Nrg3_pSyn_Gfp	DN196	5	7	5	43.081	0.162485	0.11606	0.714286
pSyn_Nrg3_pSyn_Gfp	DN196	6	13	6	44.545	0.29184	0.134695	0.461538
pSyn_Nrg3_pSyn_Gfp	DN196	7	15	12	44.919	0.333934	0.267148	0.8
pSyn_Nrg3_pSyn_Gfp	DN196	8	16	3	44.573	0.358962	0.0673053	0.1875
pSyn_Nrg3_pSyn_Gfp	DN196	9	8	1	53.901	0.14842	0.0185525	0.125
pSyn_Nrg3_pSyn_Gfp	DN197	1	13	8	47.419	0.274152	0.168709	0.615385
pSyn_Nrg3_pSyn_Gfp	DN197	2	13	9	53.062	0.244996	0.169613	0.692308
pSyn_Nrg3_pSyn_Gfp	DN197	3	11	7	48.151	0.228448	0.145376	0.636364
pSyn_Nrg3_pSyn_Gfp	DN197	4	5	2	36.328	0.137635	0.055054	0.4
pSyn_Nrg3_pSyn_Gfp	DN197	5	12	9	44.787	0.267935	0.200951	0.75
pSyn_Nrg3_pSyn_Gfp	DN197	6	17	10	47.477	0.358068	0.210628	0.588235
pSyn_Nrg3_pSyn_Gfp	DN197	7	21	20	48.613	0.431983	0.411413	0.952381
pSyn_Nrg3_pSyn_Gfp	DN197	8	25	15	45.557	0.548763	0.329258	0.6
