# Supplementary material for: Subcellular sorting of neuregulins controls the assembly of excitatory-inhibitory cortical circuits
Source: eLife. 2020 Dec 15;9:e57000. doi: 10.7554/eLife.57000 (PMC7755390; doi:10.7554/eLife.57000)
Supplement: Figure 3—figure supplement 6—source data 1. [file elife-57000-fig3-figsupp6-data1.xlsx]

## Sheet: Sheet1
Plasmid	Brain	Cell	Count_erbb4	Count_erbb4_ha_gfp	Perimeter	Density_erbb4	Density_erbb4_ha_gfp	Proprtion_erbb4_ha_gfp
pSyn_Nrg3_pSyn_Gfp	DN194	1	36	26	59.602	0.604007	0.436227	0.722222
pSyn_Nrg3_pSyn_Gfp	DN194	2	13	13	59.997	0.216678	0.216678	1
pSyn_Nrg3_pSyn_Gfp	DN194	3	11	11	54.913	0.200317	0.200317	1
pSyn_Nrg3_pSyn_Gfp	DN194	4	13	11	51.508	0.252388	0.213559	0.846154
pSyn_Nrg3_pSyn_Gfp	DN194	5	14	13	49.662	0.281906	0.26177	0.928571
pSyn_Nrg3_pSyn_Gfp	DN194	6	15	12	41.256	0.363583	0.290867	0.8
pSyn_Nrg3_pSyn_Gfp	DN194	7	23	22	53.659	0.428633	0.409996	0.956522
pSyn_Nrg3_pSyn_Gfp	DN194	8	18	17	57.456	0.313283	0.295879	0.944444
pSyn_Nrg3_pSyn_Gfp	DN195	1	23	19	57.617	0.399188	0.329764	0.826087
pSyn_Nrg3_pSyn_Gfp	DN195	2	10	9	46.888	0.213274	0.191947	0.9
pSyn_Nrg3_pSyn_Gfp	DN195	3	12	9	55.853	0.21485	0.161137	0.75
pSyn_Nrg3_pSyn_Gfp	DN195	4	12	11	48.335	0.248267	0.227578	0.916667
pSyn_Nrg3_pSyn_Gfp	DN195	5	16	10	40.954	0.390682	0.244176	0.625
pSyn_Nrg3_pSyn_Gfp	DN195	6	20	16	50.18	0.398565	0.318852	0.8
pSyn_Nrg3_pSyn_Gfp	DN195	7	28	22	55.222	0.507044	0.398392	0.785714
pSyn_Nrg3_pSyn_Gfp	DN195	8	34	32	59.293	0.573424	0.539693	0.941176
pSyn_Nrg3_pSyn_Gfp	DN195	9	25	25	48.924	0.510997	0.510997	1
pSyn_Nrg3_pSyn_Gfp	DN195	10	27	25	47.518	0.568206	0.526116	0.925926
pSyn_Nrg3_pSyn_Gfp	DN196	1	14	14	56.349	0.248452	0.248452	1
pSyn_Nrg3_pSyn_Gfp	DN196	2	12	11	41.698	0.287784	0.263802	0.916667
pSyn_Nrg3_pSyn_Gfp	DN196	3	28	28	51.95	0.53898	0.53898	1
pSyn_Nrg3_pSyn_Gfp	DN196	4	23	21	54.139	0.424832	0.38789	0.913043
pSyn_Nrg3_pSyn_Gfp	DN196	5	28	26	51.449	0.544228	0.505355	0.928571
pSyn_Nrg3_pSyn_Gfp	DN196	6	24	21	54.486	0.44048	0.38542	0.875
pSyn_Nrg3_pSyn_Gfp	DN196	7	26	25	62.313	0.417248	0.4012	0.961538
pSyn_Nrg3_pSyn_Gfp	DN196	8	29	22	60.203	0.481704	0.36543	0.758621
pSyn_Nrg3_pSyn_Gfp	DN196	9	16	16	55.778	0.286851	0.286851	1
pSyn_Nrg3_pSyn_Gfp	DN196	10	25	24	53.498	0.467307	0.448615	0.96
pSyn_Nrg3_pSyn_Gfp	DN196	11	21	18	52.134	0.402808	0.345264	0.857143
pSyn_Nrg3_pSyn_Gfp	DN197	1	17	13	56.822	0.29918	0.228785	0.764706
pSyn_Nrg3_pSyn_Gfp	DN197	2	16	14	66.127	0.241959	0.211714	0.875
pSyn_Nrg3_pSyn_Gfp	DN197	3	27	25	65.023	0.415238	0.384479	0.925926
pSyn_Nrg3_pSyn_Gfp	DN197	4	19	19	63.877	0.297447	0.297447	1
pSyn_Nrg3_pSyn_Gfp	DN197	5	23	21	70.873	0.324524	0.296305	0.913043
pSyn_Nrg3_pSyn_Gfp	DN197	6	20	16	62.349	0.320775	0.25662	0.8
pSyn_Nrg3_pSyn_Gfp	DN197	7	20	17	53.188	0.376025	0.319621	0.85
pSyn_Nrg3_pSyn_Gfp	DN197	8	25	18	54.241	0.460906	0.331852	0.72
pSyn_Nrg3_pSyn_Gfp	DN197	9	23	23	62.269	0.369365	0.369365	1
pSyn_Nrg3_pSyn_Gfp	DN197	10	24	24	57.857	0.414816	0.414816	1
pSyn_Nrg3_pSyn_Gfp	DN197	11	23	21	56.024	0.410538	0.374839	0.913043
