# Supplementary material for: Subcellular sorting of neuregulins controls the assembly of excitatory-inhibitory cortical circuits
Source: eLife. 2020 Dec 15;9:e57000. doi: 10.7554/eLife.57000 (PMC7755390; doi:10.7554/eLife.57000)
Supplement: Figure 3—source data 1. [file elife-57000-fig3-data1.xlsx]

## Sheet: Colocalization_soma
Plasmid	Brain	ROI	Count_HA_GFP_cells	Proportion_HA_GFP_cells
pSyn_Nrg1_pSyn_Gfp	DN185	1	20	0.909091
pSyn_Nrg1_pSyn_Gfp	DN185	2	14	0.666667
pSyn_Nrg1_pSyn_Gfp	DN185	3	25	0.735294
pSyn_Nrg1_pSyn_Gfp	DN185	4	25	0.925926
pSyn_Nrg1_pSyn_Gfp	DN185	5	15	0.833333
pSyn_Nrg1_pSyn_Gfp	DN185	6	11	0.733333
pSyn_Nrg1_pSyn_Gfp	DN186	1	16	0.761905
pSyn_Nrg1_pSyn_Gfp	DN186	2	11	0.785714
pSyn_Nrg1_pSyn_Gfp	DN186	3	16	0.695652
pSyn_Nrg1_pSyn_Gfp	DN186	4	16	0.941176
pSyn_Nrg1_pSyn_Gfp	DN186	5	16	0.842105
pSyn_Nrg1_pSyn_Gfp	DN186	6	21	0.807692
pSyn_Nrg1_pSyn_Gfp	DN186	7	15	0.652174
pSyn_Nrg1_pSyn_Gfp	DN186	8	18	0.75
pSyn_Nrg1_pSyn_Gfp	DN186	9	13	1
pSyn_Nrg1_pSyn_Gfp	DN186	10	17	0.708333
pSyn_Nrg1_pSyn_Gfp	DN186	11	12	0.666667
pSyn_Nrg1_pSyn_Gfp	DN190	1	21	0.84
pSyn_Nrg1_pSyn_Gfp	DN190	2	15	0.882353
pSyn_Nrg1_pSyn_Gfp	DN190	3	19	0.730769
pSyn_Nrg1_pSyn_Gfp	DN190	4	29	0.90625
pSyn_Nrg1_pSyn_Gfp	DN190	5	17	0.772727
pSyn_Nrg1_pSyn_Gfp	DN190	6	9	0.692308
pSyn_Nrg1_pSyn_Gfp	DN190	7	14	0.933333
pSyn_Nrg1_pSyn_Gfp	DN193	1	26	0.866667
pSyn_Nrg1_pSyn_Gfp	DN193	2	20	0.769231
pSyn_Nrg1_pSyn_Gfp	DN193	3	16	0.8
pSyn_Nrg1_pSyn_Gfp	DN193	4	20	0.909091
pSyn_Nrg1_pSyn_Gfp	DN193	5	14	0.823529
pSyn_Nrg1_pSyn_Gfp	DN193	6	13	0.928571
pSyn_Nrg1_pSyn_Gfp	DN193	7	24	1
pSyn_Nrg1_pSyn_Gfp	DN193	8	22	0.814815
pSyn_Nrg3_pSyn_Gfp	DN194	1	1	0.0285714
pSyn_Nrg3_pSyn_Gfp	DN194	2	1	0.027027
pSyn_Nrg3_pSyn_Gfp	DN194	3	0	0
pSyn_Nrg3_pSyn_Gfp	DN194	4	1	0.0344828
pSyn_Nrg3_pSyn_Gfp	DN194	5	1	0.04
pSyn_Nrg3_pSyn_Gfp	DN194	6	1	0.0416667
pSyn_Nrg3_pSyn_Gfp	DN194	7	2	0.0689655
pSyn_Nrg3_pSyn_Gfp	DN195	1	0	0
pSyn_Nrg3_pSyn_Gfp	DN195	2	1	0.0263158
pSyn_Nrg3_pSyn_Gfp	DN195	3	0	0
pSyn_Nrg3_pSyn_Gfp	DN195	4	1	0.037037
pSyn_Nrg3_pSyn_Gfp	DN195	5	0	0
pSyn_Nrg3_pSyn_Gfp	DN195	6	0	0
pSyn_Nrg3_pSyn_Gfp	DN195	7	0	0
pSyn_Nrg3_pSyn_Gfp	DN195	8	2	0.0869565
pSyn_Nrg3_pSyn_Gfp	DN196	1	0	0
pSyn_Nrg3_pSyn_Gfp	DN196	2	3	0.0882353
pSyn_Nrg3_pSyn_Gfp	DN196	3	0	0
pSyn_Nrg3_pSyn_Gfp	DN196	4	1	0.0333333
pSyn_Nrg3_pSyn_Gfp	DN196	5	1	0.0294118
pSyn_Nrg3_pSyn_Gfp	DN196	6	1	0.0384615
pSyn_Nrg3_pSyn_Gfp	DN196	7	1	0.0526316
pSyn_Nrg3_pSyn_Gfp	DN196	8	0	0
pSyn_Nrg3_pSyn_Gfp	DN197	1	1	0.0344828
pSyn_Nrg3_pSyn_Gfp	DN197	2	2	0.0625
pSyn_Nrg3_pSyn_Gfp	DN197	3	0	0
pSyn_Nrg3_pSyn_Gfp	DN197	4	0	0
pSyn_Nrg3_pSyn_Gfp	DN197	5	0	0
pSyn_Nrg3_pSyn_Gfp	DN197	6	1	0.037037
pSyn_Nrg3_pSyn_Gfp	DN197	7	1	0.0555556
pSyn_Nrg3_pSyn_Gfp	DN197	8	0	0
pSyn_Nrg3_pSyn_Gfp	DN197	9	0	0

## Sheet: Colocalization_neuropil
Plasmid	Brain	ROI	Area_colocalization	Area_GFP	Area_HA	Proportion_colocalization
pSyn_Nrg1_pSyn_Gfp	DN185	1	0.00394976	0.594492	0.00517988	0.00664393
pSyn_Nrg1_pSyn_Gfp	DN185	2	0.00424564	0.424677	0.00697494	0.00999733
pSyn_Nrg1_pSyn_Gfp	DN185	3	0.00326955	0.614346	0.00524271	0.00532201
pSyn_Nrg1_pSyn_Gfp	DN185	4	0.0023576	0.422644	0.00455594	0.00557822
pSyn_Nrg1_pSyn_Gfp	DN185	5	0.00217259	0.594599	0.00420189	0.00365387
pSyn_Nrg1_pSyn_Gfp	DN185	6	0.00206041	0.441954	0.003461	0.00466205
pSyn_Nrg1_pSyn_Gfp	DN185	7	0.00220645	0.507757	0.00444853	0.00434548
pSyn_Nrg1_pSyn_Gfp	DN185	8	0.00154579	0.41749	0.00319636	0.00370257
pSyn_Nrg1_pSyn_Gfp	DN186	1	0.00543117	0.474855	0.00852764	0.0114375
pSyn_Nrg1_pSyn_Gfp	DN186	2	0.00560999	0.507034	0.00806391	0.0110643
pSyn_Nrg1_pSyn_Gfp	DN186	3	0.00459516	0.484876	0.00673926	0.00947698
pSyn_Nrg1_pSyn_Gfp	DN186	4	0.001827	0.475249	0.0039612	0.0038443
pSyn_Nrg1_pSyn_Gfp	DN186	5	0.00243759	0.461251	0.00520921	0.00528474
pSyn_Nrg1_pSyn_Gfp	DN186	6	0.00689209	0.532851	0.0101215	0.0129343
pSyn_Nrg1_pSyn_Gfp	DN186	7	0.00548077	0.523716	0.00832105	0.0104651
pSyn_Nrg1_pSyn_Gfp	DN186	8	0.0102929	0.467287	0.0160635	0.0220269
pSyn_Nrg1_pSyn_Gfp	DN186	9	0.00206983	0.543744	0.00389266	0.00380663
pSyn_Nrg1_pSyn_Gfp	DN190	1	0.00559413	0.537802	0.00853753	0.0104018
pSyn_Nrg1_pSyn_Gfp	DN190	2	0.00353169	0.552808	0.00546861	0.00638864
pSyn_Nrg1_pSyn_Gfp	DN190	3	0.00099504	0.564169	0.00283647	0.00176373
pSyn_Nrg1_pSyn_Gfp	DN190	4	0.00272679	0.433143	0.00462318	0.00629537
pSyn_Nrg1_pSyn_Gfp	DN190	5	0.00428832	0.424608	0.0074712	0.0100995
pSyn_Nrg1_pSyn_Gfp	DN190	6	0.00193012	0.45767	0.00411034	0.00421727
pSyn_Nrg1_pSyn_Gfp	DN190	7	0.00912857	0.542402	0.0125332	0.0168299
pSyn_Nrg1_pSyn_Gfp	DN190	8	0.00617611	0.485598	0.00933957	0.0127186
pSyn_Nrg1_pSyn_Gfp	DN190	9	0.00879133	0.532622	0.0137051	0.0165057
pSyn_Nrg1_pSyn_Gfp	DN193	1	0.004619	0.519461	0.0081954	0.00889191
pSyn_Nrg1_pSyn_Gfp	DN193	2	0.00369263	0.550796	0.00758517	0.00670417
pSyn_Nrg1_pSyn_Gfp	DN193	3	0.00114906	0.471781	0.00489414	0.00243558
pSyn_Nrg1_pSyn_Gfp	DN193	4	0.00182712	0.478164	0.00397873	0.00382112
pSyn_Nrg1_pSyn_Gfp	DN193	5	0.00321948	0.541991	0.0067544	0.00594011
pSyn_Nrg1_pSyn_Gfp	DN193	6	0.0015533	0.590572	0.00389254	0.00263016
pSyn_Nrg3_pSyn_Gfp	DN194	1	0.149976	0.380106	0.198599	0.394562
pSyn_Nrg3_pSyn_Gfp	DN194	2	0.217384	0.525022	0.259616	0.414047
pSyn_Nrg3_pSyn_Gfp	DN194	3	0.212658	0.515607	0.262281	0.412443
pSyn_Nrg3_pSyn_Gfp	DN194	4	0.184698	0.508416	0.236552	0.363281
pSyn_Nrg3_pSyn_Gfp	DN194	5	0.172198	0.535533	0.200488	0.321544
pSyn_Nrg3_pSyn_Gfp	DN194	6	0.15828	0.382727	0.2121	0.413558
pSyn_Nrg3_pSyn_Gfp	DN194	7	0.195392	0.466987	0.248774	0.418411
pSyn_Nrg3_pSyn_Gfp	DN194	8	0.176512	0.409302	0.250312	0.431252
pSyn_Nrg3_pSyn_Gfp	DN195	1	0.175493	0.400516	0.242978	0.438168
pSyn_Nrg3_pSyn_Gfp	DN195	2	0.156244	0.342243	0.22694	0.456529
pSyn_Nrg3_pSyn_Gfp	DN195	3	0.182991	0.447182	0.228094	0.409208
pSyn_Nrg3_pSyn_Gfp	DN195	4	0.170032	0.425789	0.21732	0.399333
pSyn_Nrg3_pSyn_Gfp	DN195	5	0.160105	0.40123	0.219494	0.399036
pSyn_Nrg3_pSyn_Gfp	DN195	6	0.215686	0.515707	0.254975	0.418233
pSyn_Nrg3_pSyn_Gfp	DN195	7	0.205963	0.487795	0.239097	0.422233
pSyn_Nrg3_pSyn_Gfp	DN196	1	0.191015	0.442882	0.256447	0.431299
pSyn_Nrg3_pSyn_Gfp	DN196	2	0.205048	0.479371	0.260923	0.427744
pSyn_Nrg3_pSyn_Gfp	DN196	3	0.192701	0.557167	0.229921	0.345859
pSyn_Nrg3_pSyn_Gfp	DN196	4	0.1371	0.364131	0.196199	0.376512
pSyn_Nrg3_pSyn_Gfp	DN196	5	0.162241	0.477662	0.204909	0.339657
pSyn_Nrg3_pSyn_Gfp	DN196	6	0.205493	0.596783	0.236008	0.344335
pSyn_Nrg3_pSyn_Gfp	DN196	7	0.193836	0.426776	0.261507	0.454187
pSyn_Nrg3_pSyn_Gfp	DN196	8	0.270966	0.58562	0.302676	0.462699
pSyn_Nrg3_pSyn_Gfp	DN197	1	0.222916	0.56418	0.26538	0.395115
pSyn_Nrg3_pSyn_Gfp	DN197	2	0.203227	0.527741	0.254596	0.385088
pSyn_Nrg3_pSyn_Gfp	DN197	3	0.167034	0.462187	0.225969	0.361399
pSyn_Nrg3_pSyn_Gfp	DN197	4	0.201054	0.474144	0.263487	0.424036
pSyn_Nrg3_pSyn_Gfp	DN197	5	0.220483	0.499312	0.287139	0.441573
pSyn_Nrg3_pSyn_Gfp	DN197	6	0.197951	0.518399	0.24523	0.381851
pSyn_Nrg3_pSyn_Gfp	DN197	7	0.228731	0.570729	0.278517	0.40077
pSyn_Nrg3_pSyn_Gfp	DN197	8	0.272176	0.618837	0.310377	0.439818
pSyn_Nrg3_pSyn_Gfp	DN197	9	0.252611	0.52644	0.293316	0.479847
