# Supplementary material for: Subcellular sorting of neuregulins controls the assembly of excitatory-inhibitory cortical circuits
Source: eLife. 2020 Dec 15;9:e57000. doi: 10.7554/eLife.57000 (PMC7755390; doi:10.7554/eLife.57000)
Supplement: Figure 4—figure supplement 1—source data 1. [file elife-57000-fig4-figsupp1-data1.xlsx]

## Sheet: HA_GAD65_GFPsoma
Plasmid	Brain	Cell	Count_gad65	Count_gad65_ha	Perimeter_cell	Density_gad65	Density_gad65_ha	Proportion_ha_gad65
pSyn_Nrg1_pSyn_Gfp	DN185	1	3	2	46.208	0.0649238	0.0432825	0.666667
pSyn_Nrg1_pSyn_Gfp	DN185	2	10	6	47.572	0.210208	0.126125	0.6
pSyn_Nrg1_pSyn_Gfp	DN185	3	10	2	49.884	0.200465	0.040093	0.2
pSyn_Nrg1_pSyn_Gfp	DN185	4	3	2	43.349	0.0692057	0.0461372	0.666667
pSyn_Nrg1_pSyn_Gfp	DN186	1	10	5	44.939	0.222524	0.111262	0.5
pSyn_Nrg1_pSyn_Gfp	DN186	2	16	5	50.303	0.318072	0.0993977	0.3125
pSyn_Nrg1_pSyn_Gfp	DN186	3	12	5	42.806	0.280335	0.116806	0.416667
pSyn_Nrg1_pSyn_Gfp	DN186	4	17	8	36.446	0.466444	0.219503	0.470588
pSyn_Nrg1_pSyn_Gfp	DN186	5	15	14	49.685	0.301902	0.281775	0.933333
pSyn_Nrg1_pSyn_Gfp	DN186	6	16	15	42.359	0.377724	0.354116	0.9375
pSyn_Nrg1_pSyn_Gfp	DN186	7	9	4	35.245	0.255355	0.113491	0.444444
pSyn_Nrg1_pSyn_Gfp	DN186	8	16	10	40.158	0.398426	0.249016	0.625
pSyn_Nrg1_pSyn_Gfp	DN186	9	21	17	51.951	0.404227	0.327231	0.809524
pSyn_Nrg1_pSyn_Gfp	DN186	10	18	11	45.233	0.39794	0.243185	0.611111
pSyn_Nrg1_pSyn_Gfp	DN186	11	10	5	41.836	0.239029	0.119514	0.5
pSyn_Nrg1_pSyn_Gfp	DN186	12	12	2	56.18	0.213599	0.0355999	0.166667
pSyn_Nrg1_pSyn_Gfp	DN190	1	11	8	46.938	0.234352	0.170438	0.727273
pSyn_Nrg1_pSyn_Gfp	DN190	2	12	9	44.222	0.271358	0.203519	0.75
pSyn_Nrg1_pSyn_Gfp	DN190	3	16	16	47.229	0.338775	0.338775	1
pSyn_Nrg1_pSyn_Gfp	DN190	4	16	12	51.952	0.307977	0.230982	0.75
pSyn_Nrg1_pSyn_Gfp	DN190	5	11	7	36.721	0.299556	0.190627	0.636364
pSyn_Nrg1_pSyn_Gfp	DN190	6	18	11	47.805	0.37653	0.230101	0.611111
pSyn_Nrg1_pSyn_Gfp	DN190	7	10	6	44.508	0.224679	0.134807	0.6
pSyn_Nrg1_pSyn_Gfp	DN190	8	13	3	43.171	0.301128	0.0694911	0.230769
pSyn_Nrg1_pSyn_Gfp	DN193	1	16	5	33.746	0.47413	0.148166	0.3125
pSyn_Nrg1_pSyn_Gfp	DN193	2	8	8	32.991	0.24249	0.24249	1
pSyn_Nrg1_pSyn_Gfp	DN193	3	14	9	41.781	0.335081	0.215409	0.642857
pSyn_Nrg1_pSyn_Gfp	DN193	4	12	11	44.109	0.272053	0.249382	0.916667
pSyn_Nrg1_pSyn_Gfp	DN193	5	5	4	31.82	0.157134	0.125707	0.8
pSyn_Nrg1_pSyn_Gfp	DN193	6	12	7	35.899	0.334271	0.194992	0.583333
pSyn_Nrg1_pSyn_Gfp	DN193	7	15	7	45.08	0.332742	0.15528	0.466667
pSyn_Nrg1_pSyn_Gfp	DN193	8	11	3	44.515	0.247108	0.067393	0.272727
pSyn_Nrg1_pSyn_Gfp	DN193	9	8	8	49.85	0.160481	0.160481	1
pSyn_Nrg1_pSyn_Gfp	DN193	10	17	13	49.836	0.341119	0.260856	0.764706
pSyn_Nrg3_pSyn_Gfp	DN194	1	19	0	46.661	0.407192	0	0
pSyn_Nrg3_pSyn_Gfp	DN194	2	19	1	44.822	0.423899	0.0223105	0.0526316
pSyn_Nrg3_pSyn_Gfp	DN194	3	12	1	36.579	0.328057	0.0273381	0.0833333
pSyn_Nrg3_pSyn_Gfp	DN194	4	12	2	45.685	0.262668	0.043778	0.166667
pSyn_Nrg3_pSyn_Gfp	DN194	5	17	0	41.204	0.412581	0	0
pSyn_Nrg3_pSyn_Gfp	DN194	6	23	1	49.578	0.463915	0.0201702	0.0434783
pSyn_Nrg3_pSyn_Gfp	DN194	7	16	0	46.89	0.341224	0	0
pSyn_Nrg3_pSyn_Gfp	DN194	8	12	1	44.659	0.268703	0.0223919	0.0833333
pSyn_Nrg3_pSyn_Gfp	DN195	1	14	0	48.872	0.286463	0	0
pSyn_Nrg3_pSyn_Gfp	DN195	2	23	2	47.348	0.485765	0.0422404	0.0869565
pSyn_Nrg3_pSyn_Gfp	DN195	3	17	0	46.683	0.364158	0	0
pSyn_Nrg3_pSyn_Gfp	DN195	4	23	0	43.263	0.531632	0	0
pSyn_Nrg3_pSyn_Gfp	DN195	5	31	0	55.422	0.559345	0	0
pSyn_Nrg3_pSyn_Gfp	DN195	6	25	1	56.124	0.445442	0.0178177	0.04
pSyn_Nrg3_pSyn_Gfp	DN195	7	16	0	39.808	0.401929	0	0
pSyn_Nrg3_pSyn_Gfp	DN195	8	23	0	42.715	0.538453	0	0
pSyn_Nrg3_pSyn_Gfp	DN196	1	12	0	36.812	0.325981	0	0
pSyn_Nrg3_pSyn_Gfp	DN196	2	21	1	52.086	0.403179	0.019199	0.047619
pSyn_Nrg3_pSyn_Gfp	DN196	3	19	0	45.132	0.420987	0	0
pSyn_Nrg3_pSyn_Gfp	DN196	4	9	0	38.874	0.231517	0	0
pSyn_Nrg3_pSyn_Gfp	DN196	5	14	0	48.401	0.28925	0	0
pSyn_Nrg3_pSyn_Gfp	DN196	6	20	1	53.77	0.371955	0.0185977	0.05
pSyn_Nrg3_pSyn_Gfp	DN196	7	15	0	41.8	0.358852	0	0
pSyn_Nrg3_pSyn_Gfp	DN196	8	21	0	48.317	0.43463	0	0
pSyn_Nrg3_pSyn_Gfp	DN197	1	17	0	42.157	0.403255	0	0
pSyn_Nrg3_pSyn_Gfp	DN197	2	15	0	40.797	0.367674	0	0
pSyn_Nrg3_pSyn_Gfp	DN197	3	27	2	57.44	0.470056	0.0348189	0.0740741
pSyn_Nrg3_pSyn_Gfp	DN197	4	23	0	38.759	0.593411	0	0
pSyn_Nrg3_pSyn_Gfp	DN197	5	20	3	52.477	0.381119	0.0571679	0.15
pSyn_Nrg3_pSyn_Gfp	DN197	6	26	0	51.914	0.500828	0	0
pSyn_Nrg3_pSyn_Gfp	DN197	7	25	1	53.627	0.466183	0.0186473	0.04
pSyn_Nrg3_pSyn_Gfp	DN197	8	18	0	53.405	0.337047	0	0
pSyn_Nrg1EGFNrg3_pSyn_Gfp	DN370	1	18	10	55.716	0.323067	0.179482	0.555556
pSyn_Nrg1EGFNrg3_pSyn_Gfp	DN370	2	17	15	35.816	0.474648	0.418807	0.882353
pSyn_Nrg1EGFNrg3_pSyn_Gfp	DN370	3	12	4	43.195	0.27781	0.0926033	0.333333
pSyn_Nrg1EGFNrg3_pSyn_Gfp	DN370	4	14	12	37.073	0.377633	0.323686	0.857143
pSyn_Nrg1EGFNrg3_pSyn_Gfp	DN370	5	9	7	38.308	0.234938	0.182729	0.777778
pSyn_Nrg1EGFNrg3_pSyn_Gfp	DN370	6	9	5	48.649	0.184999	0.102777	0.555556
pSyn_Nrg1EGFNrg3_pSyn_Gfp	DN370	7	14	2	54.517	0.256801	0.0366858	0.142857
pSyn_Nrg1EGFNrg3_pSyn_Gfp	DN370	8	15	11	52.633	0.284992	0.208994	0.733333
pSyn_Nrg1EGFNrg3_pSyn_Gfp	DN372	1	8	7	32.588	0.245489	0.214803	0.875
pSyn_Nrg1EGFNrg3_pSyn_Gfp	DN372	2	11	4	35.022	0.314088	0.114214	0.363636
pSyn_Nrg1EGFNrg3_pSyn_Gfp	DN372	3	16	16	38.605	0.414454	0.414454	1
pSyn_Nrg1EGFNrg3_pSyn_Gfp	DN372	4	15	12	37.918	0.39559	0.316472	0.8
pSyn_Nrg1EGFNrg3_pSyn_Gfp	DN372	5	10	5	48.813	0.204863	0.102432	0.5
pSyn_Nrg1EGFNrg3_pSyn_Gfp	DN372	6	21	11	48.852	0.42987	0.22517	0.52381
pSyn_Nrg1EGFNrg3_pSyn_Gfp	DN372	7	23	18	50.058	0.459467	0.359583	0.782609
pSyn_Nrg1EGFNrg3_pSyn_Gfp	DN372	8	21	10	49.928	0.420606	0.200288	0.47619
pSyn_Nrg1EGFNrg3_pSyn_Gfp	DN385	1	11	5	44.578	0.246758	0.112163	0.454545
pSyn_Nrg1EGFNrg3_pSyn_Gfp	DN385	2	11	4	31.027	0.35453	0.12892	0.363636
pSyn_Nrg1EGFNrg3_pSyn_Gfp	DN385	3	12	3	41.588	0.288545	0.0721362	0.25
pSyn_Nrg1EGFNrg3_pSyn_Gfp	DN385	4	10	3	38.634	0.258839	0.0776518	0.3
pSyn_Nrg1EGFNrg3_pSyn_Gfp	DN385	5	6	4	40.907	0.146674	0.0977828	0.666667
pSyn_Nrg1EGFNrg3_pSyn_Gfp	DN385	6	13	12	37.838	0.34357	0.317141	0.923077
pSyn_Nrg1EGFNrg3_pSyn_Gfp	DN385	7	11	3	39.838	0.276118	0.075305	0.272727
pSyn_Nrg1EGFNrg3_pSyn_Gfp	DN385	8	5	2	36.479	0.137065	0.0548261	0.4
pSyn_Nrg1EGFNrg3_pSyn_Gfp	DN387	1	10	4	46.015	0.21732	0.0869282	0.4
pSyn_Nrg1EGFNrg3_pSyn_Gfp	DN387	2	12	6	49.224	0.243784	0.121892	0.5
pSyn_Nrg1EGFNrg3_pSyn_Gfp	DN387	3	16	15	52.172	0.306678	0.287511	0.9375
pSyn_Nrg1EGFNrg3_pSyn_Gfp	DN387	4	13	9	44.118	0.294664	0.203998	0.692308
pSyn_Nrg1EGFNrg3_pSyn_Gfp	DN387	5	15	11	55.053	0.272465	0.199807	0.733333
pSyn_Nrg1EGFNrg3_pSyn_Gfp	DN387	6	15	7	45.881	0.326933	0.152569	0.466667
pSyn_Nrg1EGFNrg3_pSyn_Gfp	DN387	7	14	6	46.728	0.299606	0.128403	0.428571
pSyn_Nrg1EGFNrg3_pSyn_Gfp	DN387	8	12	2	44.135	0.271893	0.0453155	0.166667
pSyn_Nrg3EGFNrg1_pSyn_Gfp	DN359	1	10	1	31.969	0.312803	0.0312803	0.1
pSyn_Nrg3EGFNrg1_pSyn_Gfp	DN359	2	14	0	35.4	0.39548	0	0
pSyn_Nrg3EGFNrg1_pSyn_Gfp	DN359	3	13	0	31.758	0.409346	0	0
pSyn_Nrg3EGFNrg1_pSyn_Gfp	DN359	4	20	0	40.08	0.499002	0	0
pSyn_Nrg3EGFNrg1_pSyn_Gfp	DN359	5	25	0	49.932	0.500681	0	0
pSyn_Nrg3EGFNrg1_pSyn_Gfp	DN359	6	18	2	41.646	0.432214	0.0480238	0.111111
pSyn_Nrg3EGFNrg1_pSyn_Gfp	DN359	7	23	2	39.456	0.582928	0.0506894	0.0869565
pSyn_Nrg3EGFNrg1_pSyn_Gfp	DN359	8	15	1	39.137	0.383269	0.0255513	0.0666667
pSyn_Nrg3EGFNrg1_pSyn_Gfp	DN366	1	15	0	41.918	0.357841	0	0
pSyn_Nrg3EGFNrg1_pSyn_Gfp	DN366	2	14	0	32.779	0.427103	0	0
pSyn_Nrg3EGFNrg1_pSyn_Gfp	DN366	3	16	1	38.223	0.418596	0.0261623	0.0625
pSyn_Nrg3EGFNrg1_pSyn_Gfp	DN366	4	15	0	38.291	0.391737	0	0
pSyn_Nrg3EGFNrg1_pSyn_Gfp	DN366	5	24	0	38.817	0.618286	0	0
pSyn_Nrg3EGFNrg1_pSyn_Gfp	DN366	6	17	0	44.062	0.38582	0	0
pSyn_Nrg3EGFNrg1_pSyn_Gfp	DN366	7	19	2	38.068	0.499107	0.0525376	0.105263
pSyn_Nrg3EGFNrg1_pSyn_Gfp	DN366	8	16	2	33.255	0.481131	0.0601413	0.125
pSyn_Nrg3EGFNrg1_pSyn_Gfp	DN380	1	11	0	35.948	0.305998	0	0
pSyn_Nrg3EGFNrg1_pSyn_Gfp	DN380	2	18	0	42.069	0.427869	0	0
pSyn_Nrg3EGFNrg1_pSyn_Gfp	DN380	3	25	0	51.581	0.484675	0	0
pSyn_Nrg3EGFNrg1_pSyn_Gfp	DN380	4	18	1	37.712	0.477302	0.0265168	0.0555556
pSyn_Nrg3EGFNrg1_pSyn_Gfp	DN380	5	18	1	44.025	0.408859	0.0227144	0.0555556
pSyn_Nrg3EGFNrg1_pSyn_Gfp	DN380	6	22	1	39.594	0.55564	0.0252564	0.0454545
pSyn_Nrg3EGFNrg1_pSyn_Gfp	DN380	7	19	0	44.898	0.423181	0	0
pSyn_Nrg3EGFNrg1_pSyn_Gfp	DN380	8	13	0	35.152	0.369822	0	0
pSyn_Nrg3EGFNrg1_pSyn_Gfp	DN384	1	14	1	36.008	0.388802	0.0277716	0.0714286
pSyn_Nrg3EGFNrg1_pSyn_Gfp	DN384	2	14	0	34.271	0.408509	0	0
pSyn_Nrg3EGFNrg1_pSyn_Gfp	DN384	3	17	1	38.668	0.43964	0.0258612	0.0588235
pSyn_Nrg3EGFNrg1_pSyn_Gfp	DN384	4	20	0	38.833	0.515026	0	0
pSyn_Nrg3EGFNrg1_pSyn_Gfp	DN384	5	24	0	45.365	0.529042	0	0
pSyn_Nrg3EGFNrg1_pSyn_Gfp	DN384	6	19	0	39.38	0.482478	0	0
pSyn_Nrg3EGFNrg1_pSyn_Gfp	DN384	7	24	0	44.636	0.537683	0	0
pSyn_Nrg3EGFNrg1_pSyn_Gfp	DN384	8	22	1	43.558	0.505074	0.0229579	0.0454545
