# Supplementary material for: Subcellular sorting of neuregulins controls the assembly of excitatory-inhibitory cortical circuits
Source: eLife. 2020 Dec 15;9:e57000. doi: 10.7554/eLife.57000 (PMC7755390; doi:10.7554/eLife.57000)
Supplement: Figure 4—figure supplement 2—source data 1. [file elife-57000-fig4-figsupp2-data1.xlsx]

## Sheet: HA_VGlut1_GFP_PVsoma
Plasmid	Brain	Cell	Count_vglut1_gfp	Count_ha_vglut_gfp	Perimeter_cell	Density_vglut1_gfp	Density_ha_vglut1_gfp	Proportion_ha_vglut1_gfp
pSyn_Nrg1_pSyn_Gfp	DN184	1	14	0	45.419	0.308241	0	0
pSyn_Nrg1_pSyn_Gfp	DN184	2	12	1	42.981	0.279193	0.0232661	0.0833333
pSyn_Nrg1_pSyn_Gfp	DN184	3	25	1	61.751	0.404852	0.0161941	0.04
pSyn_Nrg1_pSyn_Gfp	DN184	4	13	1	62.131	0.209235	0.016095	0.0769231
pSyn_Nrg1_pSyn_Gfp	DN184	5	16	1	47.616	0.336022	0.0210013	0.0625
pSyn_Nrg1_pSyn_Gfp	DN184	6	21	0	43.257	0.485471	0	0
pSyn_Nrg1_pSyn_Gfp	DN184	7	29	2	61.256	0.473423	0.0326499	0.0689655
pSyn_Nrg1_pSyn_Gfp	DN184	8	15	1	49.551	0.302718	0.0201812	0.0666667
pSyn_Nrg1_pSyn_Gfp	DN184	9	15	0	49.768	0.301398	0	0
pSyn_Nrg1_pSyn_Gfp	DN184	10	11	0	49.153	0.223791	0	0
pSyn_Nrg1_pSyn_Gfp	DN185	1	13	0	52.776	0.246324	0	0
pSyn_Nrg1_pSyn_Gfp	DN185	2	10	0	44.295	0.225759	0	0
pSyn_Nrg1_pSyn_Gfp	DN185	3	25	1	53.676	0.465758	0.0186303	0.04
pSyn_Nrg1_pSyn_Gfp	DN185	4	16	0	36.967	0.432818	0	0
pSyn_Nrg1_pSyn_Gfp	DN185	5	13	2	46.993	0.276637	0.0425595	0.153846
pSyn_Nrg1_pSyn_Gfp	DN185	6	15	0	51.297	0.292415	0	0
pSyn_Nrg1_pSyn_Gfp	DN185	7	9	0	45.281	0.198759	0	0
pSyn_Nrg1_pSyn_Gfp	DN185	8	33	2	65.967	0.50025	0.0303182	0.0606061
pSyn_Nrg1_pSyn_Gfp	DN185	9	16	0	53.142	0.30108	0	0
pSyn_Nrg1_pSyn_Gfp	DN185	10	34	1	54.595	0.622768	0.0183167	0.0294118
pSyn_Nrg1_pSyn_Gfp	DN186	1	30	0	54.171	0.553802	0	0
pSyn_Nrg1_pSyn_Gfp	DN186	2	8	0	58.714	0.136254	0	0
pSyn_Nrg1_pSyn_Gfp	DN186	3	22	2	53.231	0.413293	0.0375721	0.0909091
pSyn_Nrg1_pSyn_Gfp	DN186	4	17	0	50.85	0.334317	0	0
pSyn_Nrg1_pSyn_Gfp	DN186	5	29	1	55.149	0.525848	0.0181327	0.0344828
pSyn_Nrg1_pSyn_Gfp	DN186	6	20	4	56.326	0.355076	0.0710152	0.2
pSyn_Nrg1_pSyn_Gfp	DN186	7	19	2	56.435	0.336671	0.035439	0.105263
pSyn_Nrg1_pSyn_Gfp	DN186	8	18	0	58.256	0.308981	0	0
pSyn_Nrg1_pSyn_Gfp	DN186	9	17	0	56.745	0.299586	0	0
pSyn_Nrg1_pSyn_Gfp	DN186	10	24	3	60.875	0.394251	0.0492813	0.125
pSyn_Nrg1_pSyn_Gfp	DN190	1	15	0	50.707	0.295817	0	0
pSyn_Nrg1_pSyn_Gfp	DN190	2	14	1	55.644	0.251599	0.0179714	0.0714286
pSyn_Nrg1_pSyn_Gfp	DN190	3	16	1	46.362	0.34511	0.0215694	0.0625
pSyn_Nrg1_pSyn_Gfp	DN190	4	13	0	56.729	0.22916	0	0
pSyn_Nrg1_pSyn_Gfp	DN190	5	14	0	60.682	0.230711	0	0
pSyn_Nrg1_pSyn_Gfp	DN190	6	16	0	61.437	0.260429	0	0
pSyn_Nrg1_pSyn_Gfp	DN190	7	18	0	64.758	0.277958	0	0
pSyn_Nrg1_pSyn_Gfp	DN190	8	9	1	53.843	0.167153	0.0185725	0.111111
pSyn_Nrg1_pSyn_Gfp	DN190	9	20	2	51.71	0.386772	0.0386772	0.1
pSyn_Nrg1_pSyn_Gfp	DN190	10	16	0	41.989	0.381052	0	0
pSyn_Nrg3_pSyn_Gfp	DN194	1	23	12	52.972	0.434192	0.226535	0.521739
pSyn_Nrg3_pSyn_Gfp	DN194	2	19	11	56.787	0.334584	0.193706	0.578947
pSyn_Nrg3_pSyn_Gfp	DN194	3	16	13	48.039	0.333063	0.270613	0.8125
pSyn_Nrg3_pSyn_Gfp	DN194	4	19	10	53.792	0.353212	0.185901	0.526316
pSyn_Nrg3_pSyn_Gfp	DN194	5	25	15	45.755	0.546388	0.327833	0.6
pSyn_Nrg3_pSyn_Gfp	DN194	6	28	23	53.289	0.525437	0.431609	0.821429
pSyn_Nrg3_pSyn_Gfp	DN194	7	37	24	51.963	0.712045	0.461867	0.648649
pSyn_Nrg3_pSyn_Gfp	DN194	8	28	21	61.965	0.451868	0.338901	0.75
pSyn_Nrg3_pSyn_Gfp	DN194	9	32	31	63.788	0.501662	0.485985	0.96875
pSyn_Nrg3_pSyn_Gfp	DN194	10	26	21	54.661	0.475659	0.384186	0.807692
pSyn_Nrg3_pSyn_Gfp	DN194	11	10	7	42.983	0.23265	0.162855	0.7
pSyn_Nrg3_pSyn_Gfp	DN194	12	21	15	48.445	0.433481	0.309629	0.714286
pSyn_Nrg3_pSyn_Gfp	DN195	1	18	10	60.193	0.299038	0.166132	0.555556
pSyn_Nrg3_pSyn_Gfp	DN195	2	22	21	67.275	0.327016	0.312152	0.954545
pSyn_Nrg3_pSyn_Gfp	DN195	3	29	24	54.011	0.536928	0.444354	0.827586
pSyn_Nrg3_pSyn_Gfp	DN195	4	28	18	52.48	0.533537	0.342988	0.642857
pSyn_Nrg3_pSyn_Gfp	DN195	5	31	22	67.043	0.46239	0.328148	0.709677
pSyn_Nrg3_pSyn_Gfp	DN195	6	23	17	51.267	0.448632	0.331597	0.73913
pSyn_Nrg3_pSyn_Gfp	DN195	7	20	13	49.655	0.402779	0.261806	0.65
pSyn_Nrg3_pSyn_Gfp	DN195	8	20	11	44.582	0.448612	0.246736	0.55
pSyn_Nrg3_pSyn_Gfp	DN195	9	26	18	75.448	0.344608	0.238575	0.692308
pSyn_Nrg3_pSyn_Gfp	DN195	10	28	21	54.807	0.510884	0.383163	0.75
pSyn_Nrg3_pSyn_Gfp	DN195	11	25	13	62.115	0.402479	0.209289	0.52
pSyn_Nrg3_pSyn_Gfp	DN195	12	12	7	48.216	0.24888	0.14518	0.583333
pSyn_Nrg3_pSyn_Gfp	DN195	13	19	10	59.033	0.321854	0.169397	0.526316
pSyn_Nrg3_pSyn_Gfp	DN195	14	19	11	50.988	0.372637	0.215737	0.578947
pSyn_Nrg3_pSyn_Gfp	DN195	15	26	17	49.923	0.520802	0.340524	0.653846
pSyn_Nrg3_pSyn_Gfp	DN195	16	15	11	60.221	0.249083	0.182661	0.733333
pSyn_Nrg3_pSyn_Gfp	DN196	1	16	13	43.948	0.364067	0.295804	0.8125
pSyn_Nrg3_pSyn_Gfp	DN196	2	24	11	58.998	0.406793	0.186447	0.458333
pSyn_Nrg3_pSyn_Gfp	DN196	3	18	12	55.033	0.327076	0.218051	0.666667
pSyn_Nrg3_pSyn_Gfp	DN196	4	28	25	66.628	0.420244	0.375218	0.892857
pSyn_Nrg3_pSyn_Gfp	DN196	5	17	11	49.533	0.343206	0.222074	0.647059
pSyn_Nrg3_pSyn_Gfp	DN196	6	20	15	50.235	0.398129	0.298597	0.75
pSyn_Nrg3_pSyn_Gfp	DN196	7	18	14	50.797	0.354352	0.275607	0.777778
pSyn_Nrg3_pSyn_Gfp	DN196	8	20	13	55.067	0.363194	0.236076	0.65
pSyn_Nrg3_pSyn_Gfp	DN196	9	18	8	51.424	0.350031	0.155569	0.444444
pSyn_Nrg3_pSyn_Gfp	DN196	10	21	12	53.994	0.388932	0.222247	0.571429
pSyn_Nrg3_pSyn_Gfp	DN196	11	29	14	50.109	0.578738	0.279391	0.482759
pSyn_Nrg3_pSyn_Gfp	DN196	12	19	12	50.133	0.378992	0.239363	0.631579
pSyn_Nrg3_pSyn_Gfp	DN197	1	26	24	59.786	0.434884	0.401432	0.923077
pSyn_Nrg3_pSyn_Gfp	DN197	2	28	25	55.571	0.50386	0.449875	0.892857
pSyn_Nrg3_pSyn_Gfp	DN197	3	30	27	53.961	0.555957	0.500361	0.9
pSyn_Nrg3_pSyn_Gfp	DN197	4	46	22	66.887	0.687727	0.328913	0.478261
pSyn_Nrg3_pSyn_Gfp	DN197	5	23	15	62.517	0.3679	0.239935	0.652174
pSyn_Nrg3_pSyn_Gfp	DN197	6	16	12	51.39	0.311345	0.233508	0.75
pSyn_Nrg3_pSyn_Gfp	DN197	7	14	7	56.928	0.245925	0.122962	0.5
pSyn_Nrg3_pSyn_Gfp	DN197	8	21	20	50.251	0.417902	0.398002	0.952381
pSyn_Nrg3_pSyn_Gfp	DN197	9	15	8	63.911	0.234701	0.125174	0.533333
pSyn_Nrg3_pSyn_Gfp	DN197	10	17	11	46.962	0.361995	0.234232	0.647059
pSyn_Nrg1EGFNrg3_pSyn_Gfp	DN370	1	20	0	54.895	0.364332	0	0
pSyn_Nrg1EGFNrg3_pSyn_Gfp	DN370	2	29	2	56.43	0.513911	0.0354421	0.0689655
pSyn_Nrg1EGFNrg3_pSyn_Gfp	DN370	3	18	0	48.768	0.369094	0	0
pSyn_Nrg1EGFNrg3_pSyn_Gfp	DN370	4	20	0	52.769	0.37901	0	0
pSyn_Nrg1EGFNrg3_pSyn_Gfp	DN370	5	14	0	33.184	0.42189	0	0
pSyn_Nrg1EGFNrg3_pSyn_Gfp	DN370	6	16	2	41.06	0.389674	0.0487092	0.125
pSyn_Nrg1EGFNrg3_pSyn_Gfp	DN370	7	38	5	64.271	0.591246	0.0777956	0.131579
pSyn_Nrg1EGFNrg3_pSyn_Gfp	DN370	8	12	0	52.677	0.227803	0	0
pSyn_Nrg1EGFNrg3_pSyn_Gfp	DN370	9	25	0	59.598	0.419477	0	0
pSyn_Nrg1EGFNrg3_pSyn_Gfp	DN370	10	21	2	47.254	0.444407	0.0423245	0.0952381
pSyn_Nrg1EGFNrg3_pSyn_Gfp	DN370	11	20	2	46.173	0.433154	0.0433154	0.1
pSyn_Nrg1EGFNrg3_pSyn_Gfp	DN372	1	31	1	50.181	0.617764	0.0199279	0.0322581
pSyn_Nrg1EGFNrg3_pSyn_Gfp	DN372	2	21	0	54.216	0.38734	0	0
pSyn_Nrg1EGFNrg3_pSyn_Gfp	DN372	3	18	1	41.116	0.437786	0.0243214	0.0555556
pSyn_Nrg1EGFNrg3_pSyn_Gfp	DN372	4	16	2	43.84	0.364964	0.0456204	0.125
pSyn_Nrg1EGFNrg3_pSyn_Gfp	DN372	5	23	0	65.091	0.353351	0	0
pSyn_Nrg1EGFNrg3_pSyn_Gfp	DN372	6	22	0	49.182	0.447318	0	0
pSyn_Nrg1EGFNrg3_pSyn_Gfp	DN372	7	21	0	50.121	0.418986	0	0
pSyn_Nrg1EGFNrg3_pSyn_Gfp	DN372	8	9	0	37.961	0.237085	0	0
pSyn_Nrg1EGFNrg3_pSyn_Gfp	DN372	9	16	0	49.975	0.32016	0	0
pSyn_Nrg1EGFNrg3_pSyn_Gfp	DN372	10	5	0	40.575	0.123229	0	0
pSyn_Nrg1EGFNrg3_pSyn_Gfp	DN372	11	28	2	48.974	0.571732	0.040838	0.0714286
pSyn_Nrg1EGFNrg3_pSyn_Gfp	DN385	1	23	0	49.234	0.467157	0	0
pSyn_Nrg1EGFNrg3_pSyn_Gfp	DN385	2	19	1	51.383	0.369772	0.0194617	0.0526316
pSyn_Nrg1EGFNrg3_pSyn_Gfp	DN385	3	23	1	59.499	0.386561	0.016807	0.0434783
pSyn_Nrg1EGFNrg3_pSyn_Gfp	DN385	4	22	0	42.493	0.517732	0	0
pSyn_Nrg1EGFNrg3_pSyn_Gfp	DN385	5	19	2	46.637	0.407402	0.0428844	0.105263
pSyn_Nrg1EGFNrg3_pSyn_Gfp	DN385	6	23	0	53.044	0.433602	0	0
pSyn_Nrg1EGFNrg3_pSyn_Gfp	DN385	7	42	3	56.648	0.741421	0.0529586	0.0714286
pSyn_Nrg1EGFNrg3_pSyn_Gfp	DN385	8	31	2	41.809	0.741467	0.0478366	0.0645161
pSyn_Nrg1EGFNrg3_pSyn_Gfp	DN385	9	24	0	51.844	0.462927	0	0
pSyn_Nrg1EGFNrg3_pSyn_Gfp	DN385	10	22	0	42.221	0.521068	0	0
pSyn_Nrg1EGFNrg3_pSyn_Gfp	DN387	1	23	0	59.507	0.386509	0	0
pSyn_Nrg1EGFNrg3_pSyn_Gfp	DN387	2	20	1	51.802	0.386085	0.0193043	0.05
pSyn_Nrg1EGFNrg3_pSyn_Gfp	DN387	3	14	2	45.897	0.305031	0.0435758	0.142857
pSyn_Nrg1EGFNrg3_pSyn_Gfp	DN387	4	13	1	40.376	0.321973	0.0247672	0.0769231
pSyn_Nrg1EGFNrg3_pSyn_Gfp	DN387	5	23	2	56	0.410714	0.0357143	0.0869565
pSyn_Nrg1EGFNrg3_pSyn_Gfp	DN387	6	11	1	52.204	0.210712	0.0191556	0.0909091
pSyn_Nrg1EGFNrg3_pSyn_Gfp	DN387	7	13	0	52.835	0.246049	0	0
pSyn_Nrg1EGFNrg3_pSyn_Gfp	DN387	8	9	0	65.836	0.136703	0	0
pSyn_Nrg1EGFNrg3_pSyn_Gfp	DN387	9	18	2	40.385	0.44571	0.0495233	0.111111
pSyn_Nrg1EGFNrg3_pSyn_Gfp	DN387	10	24	2	57.934	0.414265	0.034522	0.0833333
pSyn_Nrg3EGFNrg1_pSyn_Gfp	DN366	1	19	14	49.177	0.386359	0.284686	0.736842
pSyn_Nrg3EGFNrg1_pSyn_Gfp	DN366	2	21	12	48.762	0.430663	0.246093	0.571429
pSyn_Nrg3EGFNrg1_pSyn_Gfp	DN366	3	10	8	27.183	0.367877	0.294302	0.8
pSyn_Nrg3EGFNrg1_pSyn_Gfp	DN366	4	18	11	44.72	0.402504	0.245975	0.611111
pSyn_Nrg3EGFNrg1_pSyn_Gfp	DN366	5	27	16	50.166	0.538213	0.318941	0.592593
pSyn_Nrg3EGFNrg1_pSyn_Gfp	DN366	6	19	17	51.285	0.370479	0.331481	0.894737
pSyn_Nrg3EGFNrg1_pSyn_Gfp	DN366	7	31	18	57.506	0.539074	0.313011	0.580645
pSyn_Nrg3EGFNrg1_pSyn_Gfp	DN366	8	18	14	59.726	0.301376	0.234404	0.777778
pSyn_Nrg3EGFNrg1_pSyn_Gfp	DN366	9	26	18	57.82	0.449671	0.311311	0.692308
pSyn_Nrg3EGFNrg1_pSyn_Gfp	DN375	1	26	14	55.204	0.47098	0.253605	0.538462
pSyn_Nrg3EGFNrg1_pSyn_Gfp	DN375	2	21	13	50.678	0.414381	0.256522	0.619048
pSyn_Nrg3EGFNrg1_pSyn_Gfp	DN375	3	12	6	46.025	0.260728	0.130364	0.5
pSyn_Nrg3EGFNrg1_pSyn_Gfp	DN375	4	15	10	46.829	0.320314	0.213543	0.666667
pSyn_Nrg3EGFNrg1_pSyn_Gfp	DN375	5	19	11	57.229	0.332	0.19221	0.578947
pSyn_Nrg3EGFNrg1_pSyn_Gfp	DN375	6	17	12	45.836	0.370888	0.261803	0.705882
pSyn_Nrg3EGFNrg1_pSyn_Gfp	DN375	7	30	21	46.75	0.641711	0.449198	0.7
pSyn_Nrg3EGFNrg1_pSyn_Gfp	DN375	8	19	17	45.038	0.421866	0.377459	0.894737
pSyn_Nrg3EGFNrg1_pSyn_Gfp	DN380	1	16	10	61.467	0.260302	0.162689	0.625
pSyn_Nrg3EGFNrg1_pSyn_Gfp	DN380	2	20	11	51.28	0.390016	0.214509	0.55
pSyn_Nrg3EGFNrg1_pSyn_Gfp	DN380	3	21	11	56.142	0.374052	0.195932	0.52381
pSyn_Nrg3EGFNrg1_pSyn_Gfp	DN380	4	35	21	66.95	0.522778	0.313667	0.6
pSyn_Nrg3EGFNrg1_pSyn_Gfp	DN380	5	17	10	56.206	0.302459	0.177917	0.588235
pSyn_Nrg3EGFNrg1_pSyn_Gfp	DN380	6	25	16	53.769	0.464952	0.297569	0.64
pSyn_Nrg3EGFNrg1_pSyn_Gfp	DN380	7	28	17	53.056	0.527744	0.320416	0.607143
pSyn_Nrg3EGFNrg1_pSyn_Gfp	DN380	8	26	19	48.56	0.53542	0.391269	0.730769
pSyn_Nrg3EGFNrg1_pSyn_Gfp	DN380	9	16	11	47.665	0.335676	0.230777	0.6875
pSyn_Nrg3EGFNrg1_pSyn_Gfp	DN380	10	23	16	58.779	0.391296	0.272206	0.695652
pSyn_Nrg3EGFNrg1_pSyn_Gfp	DN380	11	20	11	42.867	0.466559	0.256608	0.55
pSyn_Nrg3EGFNrg1_pSyn_Gfp	DN384	1	29	23	62.204	0.466208	0.369751	0.793103
pSyn_Nrg3EGFNrg1_pSyn_Gfp	DN384	2	25	17	61.602	0.405831	0.275965	0.68
pSyn_Nrg3EGFNrg1_pSyn_Gfp	DN384	3	23	19	42.935	0.535693	0.442529	0.826087
pSyn_Nrg3EGFNrg1_pSyn_Gfp	DN384	4	21	8	48.828	0.430081	0.16384	0.380952
pSyn_Nrg3EGFNrg1_pSyn_Gfp	DN384	5	27	20	60.878	0.44351	0.328526	0.740741
pSyn_Nrg3EGFNrg1_pSyn_Gfp	DN384	6	21	8	45.706	0.459458	0.175032	0.380952
pSyn_Nrg3EGFNrg1_pSyn_Gfp	DN384	7	25	25	48.883	0.511425	0.511425	1
pSyn_Nrg3EGFNrg1_pSyn_Gfp	DN384	8	19	15	40.935	0.46415	0.366435	0.789474
pSyn_Nrg3EGFNrg1_pSyn_Gfp	DN384	9	22	12	54.05	0.407031	0.222017	0.545455
pSyn_Nrg3EGFNrg1_pSyn_Gfp	DN384	10	19	14	45.865	0.414259	0.305244	0.736842
pSyn_Nrg3EGFNrg1_pSyn_Gfp	DN384	11	21	18	65.342	0.321386	0.275474	0.857143
