# Supplementary material for: Subcellular sorting of neuregulins controls the assembly of excitatory-inhibitory cortical circuits
Source: eLife. 2020 Dec 15;9:e57000. doi: 10.7554/eLife.57000 (PMC7755390; doi:10.7554/eLife.57000)
Supplement: Figure 4—source data 1. [file elife-57000-fig4-data1.xlsx]

## Sheet: Colocalization_soma
Plasmid	Brain	ROI	Count_HA_GFP_cells	Proportion_HA_GFP_cells
pSyn_Nrg1EGFNrg3_pSyn_Gfp	DN353	1	14	0.777778
pSyn_Nrg1EGFNrg3_pSyn_Gfp	DN353	2	19	0.730769
pSyn_Nrg1EGFNrg3_pSyn_Gfp	DN353	3	18	0.9
pSyn_Nrg1EGFNrg3_pSyn_Gfp	DN353	4	15	0.833333
pSyn_Nrg1EGFNrg3_pSyn_Gfp	DN353	5	9	0.75
pSyn_Nrg1EGFNrg3_pSyn_Gfp	DN353	6	10	1
pSyn_Nrg1EGFNrg3_pSyn_Gfp	DN353	7	15	0.833333
pSyn_Nrg1EGFNrg3_pSyn_Gfp	DN370	1	21	0.7
pSyn_Nrg1EGFNrg3_pSyn_Gfp	DN370	2	21	0.7
pSyn_Nrg1EGFNrg3_pSyn_Gfp	DN370	3	21	0.75
pSyn_Nrg1EGFNrg3_pSyn_Gfp	DN370	4	20	0.952381
pSyn_Nrg1EGFNrg3_pSyn_Gfp	DN370	5	13	0.722222
pSyn_Nrg1EGFNrg3_pSyn_Gfp	DN370	6	20	0.769231
pSyn_Nrg1EGFNrg3_pSyn_Gfp	DN370	7	19	0.730769
pSyn_Nrg1EGFNrg3_pSyn_Gfp	DN370	8	14	0.666667
pSyn_Nrg1EGFNrg3_pSyn_Gfp	DN370	9	24	0.857143
pSyn_Nrg1EGFNrg3_pSyn_Gfp	DN371	1	22	0.956522
pSyn_Nrg1EGFNrg3_pSyn_Gfp	DN371	2	24	0.857143
pSyn_Nrg1EGFNrg3_pSyn_Gfp	DN371	3	28	0.848485
pSyn_Nrg1EGFNrg3_pSyn_Gfp	DN371	4	23	0.884615
pSyn_Nrg1EGFNrg3_pSyn_Gfp	DN371	5	17	0.772727
pSyn_Nrg1EGFNrg3_pSyn_Gfp	DN371	6	24	0.888889
pSyn_Nrg1EGFNrg3_pSyn_Gfp	DN371	7	24	0.923077
pSyn_Nrg1EGFNrg3_pSyn_Gfp	DN372	1	21	0.777778
pSyn_Nrg1EGFNrg3_pSyn_Gfp	DN372	2	20	0.714286
pSyn_Nrg1EGFNrg3_pSyn_Gfp	DN372	3	21	0.875
pSyn_Nrg1EGFNrg3_pSyn_Gfp	DN372	4	19	0.730769
pSyn_Nrg1EGFNrg3_pSyn_Gfp	DN372	5	20	0.740741
pSyn_Nrg1EGFNrg3_pSyn_Gfp	DN372	6	26	0.928571
pSyn_Nrg1EGFNrg3_pSyn_Gfp	DN372	7	17	0.85
pSyn_Nrg1EGFNrg3_pSyn_Gfp	DN385	1	20	0.714286
pSyn_Nrg1EGFNrg3_pSyn_Gfp	DN385	2	20	0.714286
pSyn_Nrg1EGFNrg3_pSyn_Gfp	DN385	3	22	0.709677
pSyn_Nrg1EGFNrg3_pSyn_Gfp	DN385	4	21	0.807692
pSyn_Nrg1EGFNrg3_pSyn_Gfp	DN385	5	17	0.809524
pSyn_Nrg1EGFNrg3_pSyn_Gfp	DN385	6	24	0.727273
pSyn_Nrg1EGFNrg3_pSyn_Gfp	DN385	7	26	0.896552
pSyn_Nrg1EGFNrg3_pSyn_Gfp	DN385	8	18	0.75
pSyn_Nrg1EGFNrg3_pSyn_Gfp	DN385	9	21	0.75
pSyn_Nrg1EGFNrg3_pSyn_Gfp	DN385	10	20	0.952381
pSyn_Nrg3EGFNrg1_pSyn_Gfp	DN349	1	1	0.04
pSyn_Nrg3EGFNrg1_pSyn_Gfp	DN349	2	1	0.037037
pSyn_Nrg3EGFNrg1_pSyn_Gfp	DN349	3	1	0.0344828
pSyn_Nrg3EGFNrg1_pSyn_Gfp	DN349	4	1	0.0666667
pSyn_Nrg3EGFNrg1_pSyn_Gfp	DN349	5	0	0
pSyn_Nrg3EGFNrg1_pSyn_Gfp	DN349	6	2	0.0689655
pSyn_Nrg3EGFNrg1_pSyn_Gfp	DN349	7	0	0
pSyn_Nrg3EGFNrg1_pSyn_Gfp	DN349	8	1	0.0322581
pSyn_Nrg3EGFNrg1_pSyn_Gfp	DN359	1	2	0.0769231
pSyn_Nrg3EGFNrg1_pSyn_Gfp	DN359	2	0	0
pSyn_Nrg3EGFNrg1_pSyn_Gfp	DN359	3	1	0.037037
pSyn_Nrg3EGFNrg1_pSyn_Gfp	DN359	4	0	0
pSyn_Nrg3EGFNrg1_pSyn_Gfp	DN359	5	0	0
pSyn_Nrg3EGFNrg1_pSyn_Gfp	DN359	6	1	0.04
pSyn_Nrg3EGFNrg1_pSyn_Gfp	DN359	7	0	0
pSyn_Nrg3EGFNrg1_pSyn_Gfp	DN359	8	1	0.0454545
pSyn_Nrg3EGFNrg1_pSyn_Gfp	DN364	1	1	0.0333333
pSyn_Nrg3EGFNrg1_pSyn_Gfp	DN364	2	1	0.04
pSyn_Nrg3EGFNrg1_pSyn_Gfp	DN364	3	2	0.08
pSyn_Nrg3EGFNrg1_pSyn_Gfp	DN364	4	0	0
pSyn_Nrg3EGFNrg1_pSyn_Gfp	DN364	5	1	0.03125
pSyn_Nrg3EGFNrg1_pSyn_Gfp	DN364	6	0	0
pSyn_Nrg3EGFNrg1_pSyn_Gfp	DN364	7	0	0
pSyn_Nrg3EGFNrg1_pSyn_Gfp	DN375	1	2	0.0540541
pSyn_Nrg3EGFNrg1_pSyn_Gfp	DN375	2	1	0.0384615
pSyn_Nrg3EGFNrg1_pSyn_Gfp	DN375	3	1	0.0322581
pSyn_Nrg3EGFNrg1_pSyn_Gfp	DN375	4	1	0.0333333
pSyn_Nrg3EGFNrg1_pSyn_Gfp	DN375	5	0	0
pSyn_Nrg3EGFNrg1_pSyn_Gfp	DN375	6	1	0.0333333
pSyn_Nrg3EGFNrg1_pSyn_Gfp	DN375	7	0	0
pSyn_Nrg3EGFNrg1_pSyn_Gfp	DN375	8	0	0
pSyn_Nrg3EGFNrg1_pSyn_Gfp	DN375	9	0	0
pSyn_Nrg3EGFNrg1_pSyn_Gfp	DN384	1	0	0
pSyn_Nrg3EGFNrg1_pSyn_Gfp	DN384	2	1	0.030303
pSyn_Nrg3EGFNrg1_pSyn_Gfp	DN384	3	2	0.0769231
pSyn_Nrg3EGFNrg1_pSyn_Gfp	DN384	4	0	0
pSyn_Nrg3EGFNrg1_pSyn_Gfp	DN384	5	0	0
pSyn_Nrg3EGFNrg1_pSyn_Gfp	DN384	6	1	0.0344828
pSyn_Nrg3EGFNrg1_pSyn_Gfp	DN384	7	1	0.04
pSyn_Nrg3EGFNrg1_pSyn_Gfp	DN384	8	2	0.0833333

## Sheet: Colocalization_neuropil
Plasmid	Brain	ROI	Area_colocalization	Area_GFP	Area_HA	Proportion_colocalization
pSyn_Nrg1EGFNrg3_pSyn_Gfp	DN353	1	0.000490189	0.485637	0.0018301	0.00100937
pSyn_Nrg1EGFNrg3_pSyn_Gfp	DN353	2	0.000829697	0.536999	0.00255442	0.00154506
pSyn_Nrg1EGFNrg3_pSyn_Gfp	DN353	3	0.000535607	0.445079	0.00146317	0.0012034
pSyn_Nrg1EGFNrg3_pSyn_Gfp	DN353	4	0.00111413	0.435497	0.00317228	0.0025583
pSyn_Nrg1EGFNrg3_pSyn_Gfp	DN353	5	0.00124633	0.636568	0.00301874	0.00195789
pSyn_Nrg1EGFNrg3_pSyn_Gfp	DN353	6	0.00142801	0.537884	0.00302541	0.00265486
pSyn_Nrg1EGFNrg3_pSyn_Gfp	DN353	7	0.000648856	0.403996	0.00168955	0.0016061
pSyn_Nrg1EGFNrg3_pSyn_Gfp	DN353	8	0.00201583	0.380797	0.00340688	0.00529371
pSyn_Nrg1EGFNrg3_pSyn_Gfp	DN370	1	0.00105488	0.471133	0.00287354	0.00223903
pSyn_Nrg1EGFNrg3_pSyn_Gfp	DN370	2	0.00073278	0.516435	0.00209987	0.00141892
pSyn_Nrg1EGFNrg3_pSyn_Gfp	DN370	3	0.000902653	0.460125	0.00218248	0.00196176
pSyn_Nrg1EGFNrg3_pSyn_Gfp	DN370	4	0.00195611	0.457499	0.0037173	0.00427565
pSyn_Nrg1EGFNrg3_pSyn_Gfp	DN370	5	0.000894189	0.492839	0.00230789	0.00181436
pSyn_Nrg1EGFNrg3_pSyn_Gfp	DN370	6	0.00125408	0.533388	0.00261653	0.00235116
pSyn_Nrg1EGFNrg3_pSyn_Gfp	DN370	7	0.000402451	0.399804	0.00119114	0.00100662
pSyn_Nrg1EGFNrg3_pSyn_Gfp	DN370	8	0.000758052	0.468705	0.00174773	0.00161733
pSyn_Nrg1EGFNrg3_pSyn_Gfp	DN370	9	0.000609636	0.455564	0.001598	0.0013382
pSyn_Nrg1EGFNrg3_pSyn_Gfp	DN371	1	0.000997186	0.470723	0.00205636	0.00211841
pSyn_Nrg1EGFNrg3_pSyn_Gfp	DN371	2	0.00144827	0.517114	0.00277042	0.00280068
pSyn_Nrg1EGFNrg3_pSyn_Gfp	DN371	3	0.00126421	0.510842	0.00340104	0.00247477
pSyn_Nrg1EGFNrg3_pSyn_Gfp	DN371	4	0.00140834	0.523858	0.00341165	0.0026884
pSyn_Nrg1EGFNrg3_pSyn_Gfp	DN371	5	0.00076735	0.484962	0.00180948	0.00158229
pSyn_Nrg1EGFNrg3_pSyn_Gfp	DN371	6	0.00073421	0.462651	0.00176001	0.00158696
pSyn_Nrg1EGFNrg3_pSyn_Gfp	DN371	7	0.00110412	0.498716	0.00252676	0.00221392
pSyn_Nrg1EGFNrg3_pSyn_Gfp	DN372	1	0.000577807	0.515762	0.00180924	0.0011203
pSyn_Nrg1EGFNrg3_pSyn_Gfp	DN372	2	0.00128782	0.557441	0.00321579	0.00231023
pSyn_Nrg1EGFNrg3_pSyn_Gfp	DN372	3	0.00070405	0.404561	0.00165498	0.00174028
pSyn_Nrg1EGFNrg3_pSyn_Gfp	DN372	4	0.000441551	0.428848	0.00148153	0.00102962
pSyn_Nrg1EGFNrg3_pSyn_Gfp	DN372	5	0.000740528	0.465525	0.00194108	0.00159074
pSyn_Nrg1EGFNrg3_pSyn_Gfp	DN372	6	0.000491261	0.377218	0.0015353	0.00130233
pSyn_Nrg1EGFNrg3_pSyn_Gfp	DN372	7	0.000989437	0.437195	0.00317073	0.00226315
pSyn_Nrg1EGFNrg3_pSyn_Gfp	DN385	1	0.00186563	0.441871	0.00378025	0.00422211
pSyn_Nrg1EGFNrg3_pSyn_Gfp	DN385	2	0.00271249	0.496985	0.0052042	0.00545788
pSyn_Nrg1EGFNrg3_pSyn_Gfp	DN385	3	0.00370312	0.45983	0.00682092	0.00805323
pSyn_Nrg1EGFNrg3_pSyn_Gfp	DN385	4	0.00637376	0.521801	0.0116812	0.0122149
pSyn_Nrg1EGFNrg3_pSyn_Gfp	DN385	5	0.00209844	0.616758	0.00425136	0.00340237
pSyn_Nrg1EGFNrg3_pSyn_Gfp	DN385	6	0.00147593	0.471446	0.003443	0.00313065
pSyn_Nrg1EGFNrg3_pSyn_Gfp	DN385	7	0.00234616	0.580494	0.00447083	0.00404166
pSyn_Nrg1EGFNrg3_pSyn_Gfp	DN385	8	0.00393569	0.501973	0.00718558	0.00784045
pSyn_Nrg1EGFNrg3_pSyn_Gfp	DN385	9	0.00932908	0.503874	0.0152107	0.0185147
pSyn_Nrg3EGFNrg1_pSyn_Gfp	DN349	1	0.192886	0.610139	0.211219	0.316135
pSyn_Nrg3EGFNrg1_pSyn_Gfp	DN349	2	0.231838	0.554088	0.260507	0.418414
pSyn_Nrg3EGFNrg1_pSyn_Gfp	DN349	3	0.20187	0.482672	0.245015	0.418235
pSyn_Nrg3EGFNrg1_pSyn_Gfp	DN349	4	0.168031	0.473886	0.197376	0.354581
pSyn_Nrg3EGFNrg1_pSyn_Gfp	DN349	5	0.183611	0.474138	0.21261	0.387252
pSyn_Nrg3EGFNrg1_pSyn_Gfp	DN349	6	0.206242	0.481603	0.248499	0.428241
pSyn_Nrg3EGFNrg1_pSyn_Gfp	DN349	7	0.18883	0.41787	0.23495	0.451888
pSyn_Nrg3EGFNrg1_pSyn_Gfp	DN349	8	0.152044	0.333812	0.205521	0.455479
pSyn_Nrg3EGFNrg1_pSyn_Gfp	DN349	9	0.146069	0.367256	0.183657	0.39773
pSyn_Nrg3EGFNrg1_pSyn_Gfp	DN349	10	0.0957471	0.374207	0.135986	0.255867
pSyn_Nrg3EGFNrg1_pSyn_Gfp	DN359	1	0.226442	0.455933	0.269427	0.496657
pSyn_Nrg3EGFNrg1_pSyn_Gfp	DN359	2	0.205465	0.429606	0.273835	0.478263
pSyn_Nrg3EGFNrg1_pSyn_Gfp	DN359	3	0.182249	0.506153	0.211525	0.360068
pSyn_Nrg3EGFNrg1_pSyn_Gfp	DN359	4	0.224783	0.600587	0.244619	0.374272
pSyn_Nrg3EGFNrg1_pSyn_Gfp	DN359	5	0.211538	0.54008	0.236327	0.391679
pSyn_Nrg3EGFNrg1_pSyn_Gfp	DN359	6	0.240666	0.611567	0.259501	0.393524
pSyn_Nrg3EGFNrg1_pSyn_Gfp	DN359	7	0.205104	0.412271	0.261076	0.497499
pSyn_Nrg3EGFNrg1_pSyn_Gfp	DN359	8	0.237237	0.604669	0.257652	0.392342
pSyn_Nrg3EGFNrg1_pSyn_Gfp	DN359	9	0.244915	0.607308	0.268322	0.403279
pSyn_Nrg3EGFNrg1_pSyn_Gfp	DN359	10	0.193078	0.500057	0.224981	0.386112
pSyn_Nrg3EGFNrg1_pSyn_Gfp	DN364	1	0.0642316	0.143115	0.130367	0.448811
pSyn_Nrg3EGFNrg1_pSyn_Gfp	DN364	2	0.0572877	0.15491	0.113963	0.369812
pSyn_Nrg3EGFNrg1_pSyn_Gfp	DN364	3	0.0874312	0.210755	0.120236	0.414847
pSyn_Nrg3EGFNrg1_pSyn_Gfp	DN364	4	0.101933	0.235546	0.144396	0.432754
pSyn_Nrg3EGFNrg1_pSyn_Gfp	DN364	5	0.0940439	0.227762	0.154763	0.412905
pSyn_Nrg3EGFNrg1_pSyn_Gfp	DN364	6	0.0524169	0.150555	0.095929	0.348159
pSyn_Nrg3EGFNrg1_pSyn_Gfp	DN364	7	0.0400257	0.182483	0.0643358	0.21934
pSyn_Nrg3EGFNrg1_pSyn_Gfp	DN364	8	0.0851363	0.194039	0.137093	0.438759
pSyn_Nrg3EGFNrg1_pSyn_Gfp	DN375	1	0.176196	0.674788	0.189096	0.261114
pSyn_Nrg3EGFNrg1_pSyn_Gfp	DN375	2	0.159802	0.373923	0.201063	0.427367
pSyn_Nrg3EGFNrg1_pSyn_Gfp	DN375	3	0.18265	0.474611	0.210632	0.384842
pSyn_Nrg3EGFNrg1_pSyn_Gfp	DN375	4	0.161814	0.41999	0.201586	0.385281
pSyn_Nrg3EGFNrg1_pSyn_Gfp	DN375	5	0.158461	0.389949	0.194062	0.406364
pSyn_Nrg3EGFNrg1_pSyn_Gfp	DN375	6	0.178559	0.439039	0.210325	0.406704
pSyn_Nrg3EGFNrg1_pSyn_Gfp	DN375	7	0.141839	0.395941	0.181851	0.358232
pSyn_Nrg3EGFNrg1_pSyn_Gfp	DN384	1	0.246085	0.594431	0.264492	0.413985
pSyn_Nrg3EGFNrg1_pSyn_Gfp	DN384	2	0.235735	0.611487	0.255429	0.385512
pSyn_Nrg3EGFNrg1_pSyn_Gfp	DN384	3	0.183225	0.484331	0.212607	0.378306
pSyn_Nrg3EGFNrg1_pSyn_Gfp	DN384	4	0.176167	0.387358	0.217236	0.454792
pSyn_Nrg3EGFNrg1_pSyn_Gfp	DN384	5	0.174744	0.424879	0.213455	0.411281
