# Supplementary material for: Subcellular sorting of neuregulins controls the assembly of excitatory-inhibitory cortical circuits
Source: eLife. 2020 Dec 15;9:e57000. doi: 10.7554/eLife.57000 (PMC7755390; doi:10.7554/eLife.57000)
Supplement: Figure 4—source data 2. [file elife-57000-fig4-data2.xlsx]

## Sheet: Inhibitory_synapses
Plasmid	Brain	Cell	Count_gad65_cb1r	Perimeter_cell	Density_gad65_cb1r
pSyn_Gfp	DN274	1	4	43.201	0.0925904
pSyn_Gfp	DN274	2	2	38.009	0.0526191
pSyn_Gfp	DN274	3	3	42.037	0.0713657
pSyn_Gfp	DN274	4	2	52.598	0.0380243
pSyn_Gfp	DN274	5	8	37.856	0.211327
pSyn_Gfp	DN274	6	5	45.816	0.109132
pSyn_Gfp	DN274	7	8	49.4	0.161943
pSyn_Gfp	DN274	8	5	44.9	0.111359
pSyn_Gfp	DN274	9	2	45.144	0.0443027
pSyn_Gfp	DN274	10	3	41.319	0.0726058
pSyn_Gfp	DN274	11	7	45.97	0.152273
pSyn_Gfp	DN274	12	5	43.007	0.11626
pSyn_Gfp	DN274	13	5	45.886	0.108966
pSyn_Gfp	DN277	1	6	49.335	0.121618
pSyn_Gfp	DN277	2	4	32.817	0.121888
pSyn_Gfp	DN277	3	6	31.548	0.190186
pSyn_Gfp	DN277	4	2	44.55	0.0448934
pSyn_Gfp	DN277	5	7	37.111	0.188623
pSyn_Gfp	DN277	6	1	53.249	0.0187797
pSyn_Gfp	DN277	7	3	49.134	0.0610575
pSyn_Gfp	DN277	8	4	39.579	0.101064
pSyn_Gfp	DN277	9	4	46.765	0.0855341
pSyn_Gfp	DN277	10	2	34.301	0.0583073
pSyn_Gfp	DN277	11	4	40.041	0.0998976
pSyn_Gfp	DN277	12	11	43.458	0.253118
pSyn_Gfp	DN277	13	1	49.455	0.0202204
pSyn_Gfp	DN277	14	10	52.347	0.191033
pSyn_Gfp	DN277	15	4	36.86	0.108519
pSyn_Gfp	DN277	16	6	46.813	0.12817
pSyn_Gfp	DN277	17	4	41.129	0.097255
pSyn_Gfp	DN277	18	8	45.388	0.176258
pSyn_Gfp	DN278	1	3	34.18	0.0877706
pSyn_Gfp	DN278	2	1	47.573	0.0210203
pSyn_Gfp	DN278	3	3	34.123	0.0879172
pSyn_Gfp	DN278	4	3	35.389	0.0847721
pSyn_Gfp	DN278	5	3	37.581	0.0798276
pSyn_Gfp	DN278	6	8	50.134	0.159572
pSyn_Gfp	DN278	7	14	51.973	0.269371
pSyn_Gfp	DN278	8	11	48.391	0.227315
pSyn_Gfp	DN278	9	5	53.392	0.093647
pSyn_Gfp	DN278	10	5	37.296	0.134063
pSyn_Gfp	DN278	11	5	38.374	0.130297
pSyn_Gfp	DN278	12	3	45.94	0.0653026
pSyn_Gfp	DN278	13	2	29.503	0.0677897
pSyn_Gfp	DN278	14	7	47.925	0.146062
pSyn_Gfp	DN278	15	4	40.012	0.09997
pSyn_Gfp	DN278	16	2	44.079	0.0453731
pSyn_Gfp	DN278	17	4	46.704	0.0856458
pSyn_Gfp	DN278	18	2	34.667	0.0576918
pSyn_Gfp	DN278	19	4	36.426	0.109812
pSyn_Gfp	DN278	20	1	40.168	0.0248954
pSyn_Gfp	DN278	21	7	45.065	0.155331
pSyn_Gfp	DN280	1	9	42.36	0.212465
pSyn_Gfp	DN280	2	1	40.149	0.0249072
pSyn_Gfp	DN280	3	5	44.799	0.11161
pSyn_Gfp	DN280	4	3	40.091	0.0748298
pSyn_Gfp	DN280	5	2	41.443	0.0482591
pSyn_Gfp	DN280	6	6	39.383	0.15235
pSyn_Gfp	DN280	7	2	40.584	0.0492805
pSyn_Gfp	DN280	8	4	46.79	0.0854884
pSyn_Gfp	DN280	9	5	44.631	0.11203
pSyn_Gfp	DN280	10	3	52.036	0.0576524
pSyn_Gfp	DN280	11	4	43.923	0.0910685
pSyn_Gfp	DN280	12	3	32.626	0.0919512
pSyn_Gfp	DN280	13	4	48.915	0.0817745
pSyn_Gfp	DN280	14	1	42.934	0.0232916
pSyn_Gfp	DN280	15	3	42.21	0.0710732
pSyn_Gfp	DN280	16	5	36.101	0.1385
pSyn_Gfp	DN280	17	5	43.453	0.115067
pSyn_Gfp	DN280	18	3	54.061	0.0554929
pSyn_Gfp	DN280	19	3	44.897	0.0668196
pSyn_Gfp	DN273	1	6	33.73	0.177883
pSyn_Gfp	DN273	2	4	38.578	0.103686
pSyn_Gfp	DN273	3	9	41.138	0.218776
pSyn_Gfp	DN273	4	4	35.497	0.112686
pSyn_Gfp	DN273	5	5	37.476	0.133419
pSyn_Gfp	DN273	6	2	41.229	0.0485095
pSyn_Gfp	DN273	7	4	42.021	0.0951905
pSyn_Gfp	DN273	8	8	46.684	0.171365
pSyn_Gfp	DN273	9	6	35.723	0.167959
pSyn_Gfp	DN273	10	4	55.538	0.0720228
pSyn_Gfp	DN273	11	4	49.137	0.0814051
pSyn_Gfp	DN273	12	2	46.082	0.0434009
pSyn_Gfp	DN273	13	2	35.49	0.0563539
pSyn_Gfp	DN273	14	4	43.164	0.0926698
pSyn_Gfp	DN273	15	5	43.327	0.115401
pSyn_Gfp	DN273	16	3	38.643	0.0776337
pSyn_Gfp	DN273	17	3	40.217	0.0745953
pSyn_Gfp	DN273	18	5	37.158	0.134561
pSyn_Gfp	DN273	19	6	38.015	0.157832
pSyn_Gfp	DN282	1	7	40.555	0.172605
pSyn_Gfp	DN282	2	5	40.183	0.124431
pSyn_Gfp	DN282	3	8	39.791	0.20105
pSyn_Gfp	DN282	4	2	49.687	0.040252
pSyn_Gfp	DN282	5	2	39.843	0.050197
pSyn_Gfp	DN282	6	4	35.642	0.112227
pSyn_Gfp	DN282	7	8	37.05	0.215924
pSyn_Gfp	DN282	8	2	39.916	0.0501052
pSyn_Gfp	DN282	9	2	35.387	0.0565179
pSyn_Gfp	DN282	10	4	45.27	0.0883587
pSyn_Gfp	DN282	11	4	40.655	0.0983889
pSyn_Gfp	DN282	12	5	39.416	0.126852
pSyn_Gfp	DN282	13	2	46.151	0.043336
pSyn_Gfp	DN282	14	3	45.012	0.0666489
pSyn_Gfp	DN282	15	4	38.446	0.104042
pSyn_Gfp	DN282	16	5	54.208	0.0922373
pSyn_Gfp	DN282	17	5	45.932	0.108857
pSyn_Gfp	DN282	18	2	46.608	0.0429111
pSyn_Gfp	DN282	19	7	40.98	0.170815
pSyn_Gfp	DN282	20	2	36.844	0.0542829
pSyn_Gfp	DN282	21	7	48.783	0.143493
pSyn_Gfp	DN282	22	12	50.592	0.237192
pSyn_Gfp	DN282	23	8	37.445	0.213647
pSyn_Gfp	DN282	24	2	41.501	0.0481916
pSyn_Gfp	DN282	25	5	43.368	0.115292
pSyn_Gfp	DN282	26	1	43.401	0.0230409
pSyn_Gfp	DN282	27	4	41.369	0.0966908
pSyn_Gfp	DN282	28	2	61.603	0.032466
pSyn_Gfp	DN282	29	13	46.64	0.278731
pSyn_Gfp	DN282	30	2	46.233	0.0432591
pSyn_Nrg1EGFNrg3_pSyn_Gfp	DN356	1	5	34.577	0.144605
pSyn_Nrg1EGFNrg3_pSyn_Gfp	DN356	2	9	39.26	0.229241
pSyn_Nrg1EGFNrg3_pSyn_Gfp	DN356	3	5	47.606	0.105029
pSyn_Nrg1EGFNrg3_pSyn_Gfp	DN356	4	2	43.27	0.0462214
pSyn_Nrg1EGFNrg3_pSyn_Gfp	DN356	5	7	55.575	0.125956
pSyn_Nrg1EGFNrg3_pSyn_Gfp	DN356	6	4	34.703	0.115264
pSyn_Nrg1EGFNrg3_pSyn_Gfp	DN356	7	7	42.771	0.163662
pSyn_Nrg1EGFNrg3_pSyn_Gfp	DN356	8	4	48.364	0.0827061
pSyn_Nrg1EGFNrg3_pSyn_Gfp	DN356	9	8	44.213	0.180942
pSyn_Nrg1EGFNrg3_pSyn_Gfp	DN356	10	7	36.841	0.190006
pSyn_Nrg1EGFNrg3_pSyn_Gfp	DN356	11	3	34.783	0.086249
pSyn_Nrg1EGFNrg3_pSyn_Gfp	DN356	12	4	41.041	0.0974635
pSyn_Nrg1EGFNrg3_pSyn_Gfp	DN356	13	4	43.972	0.090967
pSyn_Nrg1EGFNrg3_pSyn_Gfp	DN356	14	9	38.908	0.231315
pSyn_Nrg1EGFNrg3_pSyn_Gfp	DN356	15	2	45.998	0.0434802
pSyn_Nrg1EGFNrg3_pSyn_Gfp	DN356	16	7	59.379	0.117887
pSyn_Nrg1EGFNrg3_pSyn_Gfp	DN356	17	6	52.164	0.115022
pSyn_Nrg1EGFNrg3_pSyn_Gfp	DN356	18	6	46.585	0.128797
pSyn_Nrg1EGFNrg3_pSyn_Gfp	DN356	19	6	42.926	0.139775
pSyn_Nrg1EGFNrg3_pSyn_Gfp	DN356	20	6	45.369	0.132249
pSyn_Nrg1EGFNrg3_pSyn_Gfp	DN356	21	7	44.46	0.157445
pSyn_Nrg1EGFNrg3_pSyn_Gfp	DN356	22	3	36.38	0.0824629
pSyn_Nrg1EGFNrg3_pSyn_Gfp	DN356	23	5	41.632	0.1201
pSyn_Nrg1EGFNrg3_pSyn_Gfp	DN370	1	13	41.217	0.315404
pSyn_Nrg1EGFNrg3_pSyn_Gfp	DN370	2	10	42.74	0.233973
pSyn_Nrg1EGFNrg3_pSyn_Gfp	DN370	3	6	47.478	0.126374
pSyn_Nrg1EGFNrg3_pSyn_Gfp	DN370	4	8	49.266	0.162384
pSyn_Nrg1EGFNrg3_pSyn_Gfp	DN370	5	11	45.774	0.240311
pSyn_Nrg1EGFNrg3_pSyn_Gfp	DN370	6	8	41.154	0.194392
pSyn_Nrg1EGFNrg3_pSyn_Gfp	DN370	7	9	46.723	0.192625
pSyn_Nrg1EGFNrg3_pSyn_Gfp	DN370	8	4	44.583	0.0897203
pSyn_Nrg1EGFNrg3_pSyn_Gfp	DN370	9	9	43.641	0.206228
pSyn_Nrg1EGFNrg3_pSyn_Gfp	DN370	10	4	50.627	0.0790092
pSyn_Nrg1EGFNrg3_pSyn_Gfp	DN370	11	5	42.31	0.118175
pSyn_Nrg1EGFNrg3_pSyn_Gfp	DN370	12	3	41.315	0.0726129
pSyn_Nrg1EGFNrg3_pSyn_Gfp	DN370	13	8	47.522	0.168343
pSyn_Nrg1EGFNrg3_pSyn_Gfp	DN370	14	8	49.374	0.162029
pSyn_Nrg1EGFNrg3_pSyn_Gfp	DN370	15	5	45.438	0.11004
pSyn_Nrg1EGFNrg3_pSyn_Gfp	DN370	16	6	44.467	0.134932
pSyn_Nrg1EGFNrg3_pSyn_Gfp	DN370	17	3	55.365	0.0541859
pSyn_Nrg1EGFNrg3_pSyn_Gfp	DN370	18	7	47.313	0.147951
pSyn_Nrg1EGFNrg3_pSyn_Gfp	DN370	19	6	50.042	0.119899
pSyn_Nrg1EGFNrg3_pSyn_Gfp	DN370	20	7	50.927	0.137452
pSyn_Nrg1EGFNrg3_pSyn_Gfp	DN372	1	1	32.598	0.0306767
pSyn_Nrg1EGFNrg3_pSyn_Gfp	DN372	2	6	46.319	0.129536
pSyn_Nrg1EGFNrg3_pSyn_Gfp	DN372	3	2	40.737	0.0490954
pSyn_Nrg1EGFNrg3_pSyn_Gfp	DN372	4	5	47.41	0.105463
pSyn_Nrg1EGFNrg3_pSyn_Gfp	DN372	5	4	37.329	0.107155
pSyn_Nrg1EGFNrg3_pSyn_Gfp	DN372	6	5	44.639	0.11201
pSyn_Nrg1EGFNrg3_pSyn_Gfp	DN372	7	7	41.759	0.167629
pSyn_Nrg1EGFNrg3_pSyn_Gfp	DN372	8	4	42.749	0.0935694
pSyn_Nrg1EGFNrg3_pSyn_Gfp	DN372	9	5	42.855	0.116672
pSyn_Nrg1EGFNrg3_pSyn_Gfp	DN372	10	7	41.18	0.169985
pSyn_Nrg1EGFNrg3_pSyn_Gfp	DN372	11	9	38.376	0.234522
pSyn_Nrg1EGFNrg3_pSyn_Gfp	DN372	12	3	38.63	0.0776599
pSyn_Nrg1EGFNrg3_pSyn_Gfp	DN372	13	4	38.466	0.103988
pSyn_Nrg1EGFNrg3_pSyn_Gfp	DN372	14	9	36.985	0.243342
pSyn_Nrg1EGFNrg3_pSyn_Gfp	DN372	15	7	43.285	0.161719
pSyn_Nrg1EGFNrg3_pSyn_Gfp	DN372	16	7	35.103	0.199413
pSyn_Nrg1EGFNrg3_pSyn_Gfp	DN372	17	8	48.643	0.164464
pSyn_Nrg1EGFNrg3_pSyn_Gfp	DN372	18	3	40.602	0.073888
pSyn_Nrg1EGFNrg3_pSyn_Gfp	DN372	19	8	29.855	0.267962
pSyn_Nrg1EGFNrg3_pSyn_Gfp	DN372	20	9	43.738	0.205771
pSyn_Nrg1EGFNrg3_pSyn_Gfp	DN379	1	7	38.444	0.182083
pSyn_Nrg1EGFNrg3_pSyn_Gfp	DN379	2	6	39.439	0.152134
pSyn_Nrg1EGFNrg3_pSyn_Gfp	DN379	3	3	37.72	0.0795334
pSyn_Nrg1EGFNrg3_pSyn_Gfp	DN379	4	9	37.243	0.241656
pSyn_Nrg1EGFNrg3_pSyn_Gfp	DN379	5	13	43.551	0.298501
pSyn_Nrg1EGFNrg3_pSyn_Gfp	DN379	6	5	47.584	0.105077
pSyn_Nrg1EGFNrg3_pSyn_Gfp	DN379	7	4	36.763	0.108805
pSyn_Nrg1EGFNrg3_pSyn_Gfp	DN379	8	7	39.397	0.177679
pSyn_Nrg1EGFNrg3_pSyn_Gfp	DN379	9	4	35.104	0.113947
pSyn_Nrg1EGFNrg3_pSyn_Gfp	DN379	10	6	43.521	0.137864
pSyn_Nrg1EGFNrg3_pSyn_Gfp	DN379	11	11	49.209	0.223536
pSyn_Nrg1EGFNrg3_pSyn_Gfp	DN379	12	7	36.977	0.189307
pSyn_Nrg1EGFNrg3_pSyn_Gfp	DN379	13	6	32.018	0.187395
pSyn_Nrg1EGFNrg3_pSyn_Gfp	DN385	1	6	45.837	0.130899
pSyn_Nrg1EGFNrg3_pSyn_Gfp	DN385	2	5	46.603	0.107289
pSyn_Nrg1EGFNrg3_pSyn_Gfp	DN385	3	6	42.834	0.140076
pSyn_Nrg1EGFNrg3_pSyn_Gfp	DN385	4	5	42.402	0.117919
pSyn_Nrg1EGFNrg3_pSyn_Gfp	DN385	5	4	43.622	0.0916968
pSyn_Nrg1EGFNrg3_pSyn_Gfp	DN385	6	8	38.166	0.209611
pSyn_Nrg1EGFNrg3_pSyn_Gfp	DN385	7	8	48.4	0.165289
pSyn_Nrg1EGFNrg3_pSyn_Gfp	DN385	8	6	49.827	0.120417
pSyn_Nrg1EGFNrg3_pSyn_Gfp	DN385	9	8	47.401	0.168773
pSyn_Nrg1EGFNrg3_pSyn_Gfp	DN385	10	10	36.572	0.273433
pSyn_Nrg1EGFNrg3_pSyn_Gfp	DN385	11	6	43.754	0.13713
pSyn_Nrg1EGFNrg3_pSyn_Gfp	DN385	12	8	40.581	0.197137
pSyn_Nrg1EGFNrg3_pSyn_Gfp	DN385	13	5	37.414	0.13364
pSyn_Nrg1EGFNrg3_pSyn_Gfp	DN387	1	8	33.953	0.23562
pSyn_Nrg1EGFNrg3_pSyn_Gfp	DN387	2	10	40.542	0.246658
pSyn_Nrg1EGFNrg3_pSyn_Gfp	DN387	3	6	36.786	0.163106
pSyn_Nrg1EGFNrg3_pSyn_Gfp	DN387	4	9	36.419	0.247124
pSyn_Nrg1EGFNrg3_pSyn_Gfp	DN387	5	4	34.616	0.115554
pSyn_Nrg1EGFNrg3_pSyn_Gfp	DN387	6	4	32.577	0.122786
pSyn_Nrg1EGFNrg3_pSyn_Gfp	DN387	7	3	35.741	0.0839372
pSyn_Nrg1EGFNrg3_pSyn_Gfp	DN387	8	13	40.37	0.322021
pSyn_Nrg1EGFNrg3_pSyn_Gfp	DN387	9	3	34.881	0.0860067
pSyn_Nrg1EGFNrg3_pSyn_Gfp	DN387	10	2	31.08	0.0643501
pSyn_Nrg1EGFNrg3_pSyn_Gfp	DN387	11	10	31.435	0.318117
pSyn_Nrg1EGFNrg3_pSyn_Gfp	DN387	12	6	33.38	0.179748
pSyn_Nrg1EGFNrg3_pSyn_Gfp	DN387	13	4	25.053	0.159662
pSyn_Nrg1EGFNrg3_pSyn_Gfp	DN387	14	3	41.697	0.0719476
pSyn_Nrg1EGFNrg3_pSyn_Gfp	DN387	15	5	38.934	0.128422
pSyn_Nrg1EGFNrg3_pSyn_Gfp	DN387	16	6	36.483	0.16446
pSyn_Nrg1EGFNrg3_pSyn_Gfp	DN387	17	3	35.468	0.0845833
pSyn_Nrg1EGFNrg3_pSyn_Gfp	DN387	18	6	34.708	0.172871
pSyn_Nrg1EGFNrg3_pSyn_Gfp	DN387	19	7	34.703	0.201712
pSyn_Nrg1EGFNrg3_pSyn_Gfp	DN387	20	7	35.971	0.194601
pSyn_Nrg1EGFNrg3_pSyn_Gfp	DN387	21	8	41.239	0.193991
pSyn_Nrg3EGFNrg1_pSyn_Gfp	DN349	1	8	50.096	0.159693
pSyn_Nrg3EGFNrg1_pSyn_Gfp	DN349	2	7	60.803	0.115126
pSyn_Nrg3EGFNrg1_pSyn_Gfp	DN349	3	7	54.256	0.129018
pSyn_Nrg3EGFNrg1_pSyn_Gfp	DN349	4	1	50.777	0.019694
pSyn_Nrg3EGFNrg1_pSyn_Gfp	DN349	5	4	42.966	0.0930969
pSyn_Nrg3EGFNrg1_pSyn_Gfp	DN349	6	4	49.553	0.0807217
pSyn_Nrg3EGFNrg1_pSyn_Gfp	DN349	7	3	50.792	0.0590644
pSyn_Nrg3EGFNrg1_pSyn_Gfp	DN349	8	5	48.022	0.104119
pSyn_Nrg3EGFNrg1_pSyn_Gfp	DN349	9	6	55.86	0.107411
pSyn_Nrg3EGFNrg1_pSyn_Gfp	DN349	10	2	36.94	0.0541419
pSyn_Nrg3EGFNrg1_pSyn_Gfp	DN349	11	3	41.692	0.0719563
pSyn_Nrg3EGFNrg1_pSyn_Gfp	DN349	12	5	52.326	0.0955548
pSyn_Nrg3EGFNrg1_pSyn_Gfp	DN349	13	2	41.81	0.0478354
pSyn_Nrg3EGFNrg1_pSyn_Gfp	DN349	14	8	41.173	0.194302
pSyn_Nrg3EGFNrg1_pSyn_Gfp	DN349	15	3	34.891	0.0859821
pSyn_Nrg3EGFNrg1_pSyn_Gfp	DN349	16	3	55.266	0.0542829
pSyn_Nrg3EGFNrg1_pSyn_Gfp	DN349	17	2	43.357	0.0461287
pSyn_Nrg3EGFNrg1_pSyn_Gfp	DN349	18	6	47.41	0.126556
pSyn_Nrg3EGFNrg1_pSyn_Gfp	DN349	19	5	39.785	0.125676
pSyn_Nrg3EGFNrg1_pSyn_Gfp	DN349	20	3	44.968	0.0667141
pSyn_Nrg3EGFNrg1_pSyn_Gfp	DN349	21	2	51.735	0.0386585
pSyn_Nrg3EGFNrg1_pSyn_Gfp	DN349	22	3	46.194	0.0649435
pSyn_Nrg3EGFNrg1_pSyn_Gfp	DN349	23	2	48.128	0.0415559
pSyn_Nrg3EGFNrg1_pSyn_Gfp	DN349	24	5	48.872	0.102308
pSyn_Nrg3EGFNrg1_pSyn_Gfp	DN359	1	3	43.099	0.0696072
pSyn_Nrg3EGFNrg1_pSyn_Gfp	DN359	2	6	43.369	0.138348
pSyn_Nrg3EGFNrg1_pSyn_Gfp	DN359	3	9	48.978	0.183756
pSyn_Nrg3EGFNrg1_pSyn_Gfp	DN359	4	3	43.178	0.0694798
pSyn_Nrg3EGFNrg1_pSyn_Gfp	DN359	5	4	41.996	0.0952472
pSyn_Nrg3EGFNrg1_pSyn_Gfp	DN359	6	1	42.706	0.0234159
pSyn_Nrg3EGFNrg1_pSyn_Gfp	DN359	7	2	50.133	0.0398939
pSyn_Nrg3EGFNrg1_pSyn_Gfp	DN359	8	12	47.614	0.252027
pSyn_Nrg3EGFNrg1_pSyn_Gfp	DN359	9	8	47.87	0.167119
pSyn_Nrg3EGFNrg1_pSyn_Gfp	DN359	10	2	41.591	0.0480873
pSyn_Nrg3EGFNrg1_pSyn_Gfp	DN366	1	3	40.926	0.073303
pSyn_Nrg3EGFNrg1_pSyn_Gfp	DN366	2	3	42.97	0.0698162
pSyn_Nrg3EGFNrg1_pSyn_Gfp	DN366	3	6	47.066	0.127481
pSyn_Nrg3EGFNrg1_pSyn_Gfp	DN366	4	7	36.02	0.194336
pSyn_Nrg3EGFNrg1_pSyn_Gfp	DN366	5	5	35.782	0.139735
pSyn_Nrg3EGFNrg1_pSyn_Gfp	DN366	6	2	46.92	0.0426257
pSyn_Nrg3EGFNrg1_pSyn_Gfp	DN366	7	4	40.482	0.0988093
pSyn_Nrg3EGFNrg1_pSyn_Gfp	DN366	8	5	48.999	0.102043
pSyn_Nrg3EGFNrg1_pSyn_Gfp	DN366	9	5	57.862	0.0864125
pSyn_Nrg3EGFNrg1_pSyn_Gfp	DN366	10	11	51.919	0.211868
pSyn_Nrg3EGFNrg1_pSyn_Gfp	DN366	11	4	47.839	0.0836138
pSyn_Nrg3EGFNrg1_pSyn_Gfp	DN366	12	3	38.921	0.0770792
pSyn_Nrg3EGFNrg1_pSyn_Gfp	DN366	13	4	40.015	0.0999625
pSyn_Nrg3EGFNrg1_pSyn_Gfp	DN366	14	3	41.42	0.0724288
pSyn_Nrg3EGFNrg1_pSyn_Gfp	DN366	15	5	40.191	0.124406
pSyn_Nrg3EGFNrg1_pSyn_Gfp	DN366	16	7	39.956	0.175193
pSyn_Nrg3EGFNrg1_pSyn_Gfp	DN366	17	5	45.314	0.110341
pSyn_Nrg3EGFNrg1_pSyn_Gfp	DN366	18	4	45.502	0.0879082
pSyn_Nrg3EGFNrg1_pSyn_Gfp	DN366	19	7	35.729	0.195919
pSyn_Nrg3EGFNrg1_pSyn_Gfp	DN366	20	2	35.095	0.0569882
pSyn_Nrg3EGFNrg1_pSyn_Gfp	DN366	21	4	43.183	0.092629
pSyn_Nrg3EGFNrg1_pSyn_Gfp	DN366	22	7	39.157	0.178768
pSyn_Nrg3EGFNrg1_pSyn_Gfp	DN366	23	4	43.364	0.0922424
pSyn_Nrg3EGFNrg1_pSyn_Gfp	DN366	24	7	35.036	0.199794
pSyn_Nrg3EGFNrg1_pSyn_Gfp	DN366	25	5	36.934	0.135377
pSyn_Nrg3EGFNrg1_pSyn_Gfp	DN375	1	8	45.97	0.174027
pSyn_Nrg3EGFNrg1_pSyn_Gfp	DN375	2	6	41.206	0.14561
pSyn_Nrg3EGFNrg1_pSyn_Gfp	DN375	3	5	42.276	0.11827
pSyn_Nrg3EGFNrg1_pSyn_Gfp	DN375	4	2	43.417	0.0460649
pSyn_Nrg3EGFNrg1_pSyn_Gfp	DN375	5	4	45.481	0.0879488
pSyn_Nrg3EGFNrg1_pSyn_Gfp	DN375	6	3	37.439	0.0801303
pSyn_Nrg3EGFNrg1_pSyn_Gfp	DN375	7	5	52.445	0.095338
pSyn_Nrg3EGFNrg1_pSyn_Gfp	DN375	8	3	42.607	0.070411
pSyn_Nrg3EGFNrg1_pSyn_Gfp	DN380	1	7	50.929	0.137446
pSyn_Nrg3EGFNrg1_pSyn_Gfp	DN380	2	6	48.42	0.123916
pSyn_Nrg3EGFNrg1_pSyn_Gfp	DN380	3	4	41.932	0.0953925
pSyn_Nrg3EGFNrg1_pSyn_Gfp	DN380	4	3	41.416	0.0724358
pSyn_Nrg3EGFNrg1_pSyn_Gfp	DN380	5	6	34.39	0.174469
pSyn_Nrg3EGFNrg1_pSyn_Gfp	DN380	6	2	50.046	0.0399632
pSyn_Nrg3EGFNrg1_pSyn_Gfp	DN380	7	9	40.045	0.224747
pSyn_Nrg3EGFNrg1_pSyn_Gfp	DN380	8	5	48.763	0.102537
pSyn_Nrg3EGFNrg1_pSyn_Gfp	DN380	9	7	39.496	0.177233
pSyn_Nrg3EGFNrg1_pSyn_Gfp	DN380	10	2	47.706	0.0419234
pSyn_Nrg3EGFNrg1_pSyn_Gfp	DN380	11	2	40.929	0.0488651
pSyn_Nrg3EGFNrg1_pSyn_Gfp	DN380	12	6	42.194	0.1422
pSyn_Nrg3EGFNrg1_pSyn_Gfp	DN380	13	1	46.327	0.0215857
pSyn_Nrg3EGFNrg1_pSyn_Gfp	DN380	14	6	38.548	0.15565
pSyn_Nrg3EGFNrg1_pSyn_Gfp	DN380	15	1	39.521	0.025303
pSyn_Nrg3EGFNrg1_pSyn_Gfp	DN380	16	5	44.16	0.113225
pSyn_Nrg3EGFNrg1_pSyn_Gfp	DN380	17	5	37.656	0.132781
pSyn_Nrg3EGFNrg1_pSyn_Gfp	DN380	18	4	45.188	0.0885191
pSyn_Nrg3EGFNrg1_pSyn_Gfp	DN380	19	4	52.06	0.0768344
pSyn_Nrg3EGFNrg1_pSyn_Gfp	DN380	20	6	47.957	0.125112
pSyn_Nrg3EGFNrg1_pSyn_Gfp	DN380	21	2	48.439	0.041289

## Sheet: Excitatory_synapses
Plasmid	Brain	Cell	Count_vglut1_tdt_psd95	Perimeter_cell	Density_vglut1_tdt_pds95
pSyn_Gfp	DN274	1	11	61.365	0.179255
pSyn_Gfp	DN274	2	9	67.807	0.13273
pSyn_Gfp	DN274	3	7	52.643	0.132971
pSyn_Gfp	DN274	4	2	51.068	0.0391635
pSyn_Gfp	DN274	5	13	62.412	0.208293
pSyn_Gfp	DN274	6	7	63.12	0.1109
pSyn_Gfp	DN274	7	0	56.118	0
pSyn_Gfp	DN274	8	4	55.309	0.072321
pSyn_Gfp	DN274	9	5	63.686	0.0785102
pSyn_Gfp	DN274	10	6	56.034	0.107078
pSyn_Gfp	DN274	11	4	49.5	0.0808081
pSyn_Gfp	DN274	12	3	59.979	0.0500175
pSyn_Gfp	DN274	13	10	61.604	0.162327
pSyn_Gfp	DN274	14	8	59.768	0.133851
pSyn_Gfp	DN274	15	10	54.008	0.185158
pSyn_Gfp	DN274	16	6	66.908	0.0896754
pSyn_Gfp	DN275	1	9	66.535	0.135267
pSyn_Gfp	DN275	2	4	70.719	0.0565619
pSyn_Gfp	DN275	3	19	56.976	0.333474
pSyn_Gfp	DN275	4	1	74.301	0.0134588
pSyn_Gfp	DN275	5	4	59.481	0.0672484
pSyn_Gfp	DN275	6	8	61.054	0.131032
pSyn_Gfp	DN275	7	8	65.673	0.121816
pSyn_Gfp	DN275	8	8	66.963	0.119469
pSyn_Gfp	DN275	9	2	57.557	0.0347482
pSyn_Gfp	DN275	10	5	60.917	0.0820789
pSyn_Gfp	DN275	11	9	63.574	0.141567
pSyn_Gfp	DN275	12	5	57.382	0.0871353
pSyn_Gfp	DN275	13	7	55.339	0.126493
pSyn_Gfp	DN275	14	5	63.201	0.0791127
pSyn_Gfp	DN275	15	5	59.373	0.0842134
pSyn_Gfp	DN275	16	3	48.487	0.0618723
pSyn_Gfp	DN275	17	9	72.116	0.124799
pSyn_Gfp	DN275	18	9	67.724	0.132892
pSyn_Gfp	DN275	19	5	65.331	0.0765333
pSyn_Gfp	DN275	20	6	64.194	0.0934667
pSyn_Gfp	DN275	21	6	62.209	0.0964491
pSyn_Gfp	DN277	1	1	55.324	0.0180753
pSyn_Gfp	DN277	2	3	55.095	0.0544514
pSyn_Gfp	DN277	3	7	61.809	0.113252
pSyn_Gfp	DN277	4	4	49.856	0.0802311
pSyn_Gfp	DN277	5	12	59.719	0.200941
pSyn_Gfp	DN277	6	10	60.429	0.165483
pSyn_Gfp	DN277	7	2	73.872	0.0270739
pSyn_Gfp	DN277	8	7	71.575	0.0977995
pSyn_Gfp	DN277	9	3	65.418	0.0458589
pSyn_Gfp	DN277	10	9	48.111	0.187067
pSyn_Gfp	DN277	11	5	66.545	0.0751371
pSyn_Gfp	DN277	12	7	57.911	0.120875
pSyn_Gfp	DN277	13	2	67.659	0.02956
pSyn_Gfp	DN277	14	6	48.674	0.123269
pSyn_Gfp	DN277	15	7	55.619	0.125856
pSyn_Gfp	DN277	16	7	48.443	0.1445
pSyn_Gfp	DN277	17	6	61.538	0.0975007
pSyn_Gfp	DN277	18	6	56.239	0.106688
pSyn_Gfp	DN277	19	3	62.937	0.0476667
pSyn_Gfp	DN277	20	6	57.702	0.103983
pSyn_Gfp	DN277	21	5	51.19	0.0976753
pSyn_Gfp	DN278	1	7	51.867	0.134961
pSyn_Gfp	DN278	2	3	51.534	0.058214
pSyn_Gfp	DN278	3	4	61.269	0.0652859
pSyn_Gfp	DN278	4	5	51.495	0.0970968
pSyn_Gfp	DN278	5	6	64.349	0.0932415
pSyn_Gfp	DN278	6	4	73.171	0.0546665
pSyn_Gfp	DN278	7	3	48.525	0.0618238
pSyn_Gfp	DN278	8	9	58.31	0.154347
pSyn_Gfp	DN278	9	4	59.662	0.0670444
pSyn_Gfp	DN278	10	6	54.817	0.109455
pSyn_Gfp	DN278	11	4	54.21	0.0737871
pSyn_Gfp	DN278	12	4	53.614	0.0746074
pSyn_Gfp	DN278	13	6	57.496	0.104355
pSyn_Gfp	DN278	14	3	59.786	0.050179
pSyn_Gfp	DN278	15	9	61.915	0.145361
pSyn_Gfp	DN278	16	8	61.677	0.129708
pSyn_Gfp	DN280	1	6	56.382	0.106417
pSyn_Gfp	DN280	2	6	55.175	0.108745
pSyn_Gfp	DN280	3	2	55.12	0.0362845
pSyn_Gfp	DN280	4	8	66.473	0.12035
pSyn_Gfp	DN280	5	8	56.822	0.140791
pSyn_Gfp	DN280	6	7	69.413	0.100846
pSyn_Gfp	DN280	7	5	83.317	0.0600118
pSyn_Gfp	DN280	8	5	61.318	0.0815421
pSyn_Gfp	DN280	9	5	58.508	0.0854584
pSyn_Gfp	DN280	10	12	65.445	0.18336
pSyn_Gfp	DN280	11	12	58.822	0.204005
pSyn_Gfp	DN280	12	8	66.613	0.120097
pSyn_Gfp	DN280	13	6	64.096	0.0936096
pSyn_Gfp	DN280	14	3	55.992	0.0535791
pSyn_Gfp	DN280	15	5	54.612	0.091555
pSyn_Gfp	DN280	16	7	64.738	0.108128
pSyn_Gfp	DN280	17	6	65.884	0.0910692
pSyn_Gfp	DN280	18	3	60.254	0.0497892
pSyn_Gfp	DN280	19	4	49.062	0.0815295
pSyn_Gfp	DN280	20	5	56.499	0.0884971
pSyn_Gfp	DN281	1	5	54.078	0.092459
pSyn_Gfp	DN281	2	2	48.582	0.0411675
pSyn_Gfp	DN281	3	4	44.754	0.0893775
pSyn_Gfp	DN281	4	6	62.794	0.0955505
pSyn_Gfp	DN281	5	3	50.23	0.0597253
pSyn_Gfp	DN281	6	5	54.946	0.0909984
pSyn_Gfp	DN281	7	6	62.053	0.0966915
pSyn_Gfp	DN281	8	6	54.307	0.110483
pSyn_Gfp	DN281	9	4	58.489	0.0683889
pSyn_Gfp	DN281	10	5	51.834	0.0964618
pSyn_Gfp	DN281	11	7	49.665	0.140944
pSyn_Gfp	DN281	12	7	60.958	0.114833
pSyn_Gfp	DN281	13	3	61.369	0.0488846
pSyn_Gfp	DN281	14	6	49.42	0.121408
pSyn_Gfp	DN281	15	7	47.627	0.146975
pSyn_Gfp	DN281	16	6	66.702	0.0899523
pSyn_Gfp	DN281	17	9	63.099	0.142633
pSyn_Gfp	DN281	18	9	52.805	0.170438
pSyn_Gfp	DN281	19	4	53.055	0.0753935
pSyn_Gfp	DN276	1	2	46.97	0.0425804
pSyn_Gfp	DN276	2	6	60.603	0.099005
pSyn_Gfp	DN276	3	6	56.827	0.105584
pSyn_Gfp	DN276	4	3	57.322	0.0523359
pSyn_Gfp	DN276	5	3	56.776	0.0528392
pSyn_Gfp	DN276	6	3	59.184	0.0506894
pSyn_Gfp	DN276	7	3	52.357	0.0572989
pSyn_Gfp	DN276	8	5	49.634	0.100737
pSyn_Gfp	DN276	9	9	61.169	0.147133
pSyn_Gfp	DN276	10	10	66.069	0.151357
pSyn_Gfp	DN276	11	3	56.683	0.0529259
pSyn_Gfp	DN276	12	6	50.713	0.118313
pSyn_Gfp	DN276	13	1	43.416	0.023033
pSyn_Gfp	DN276	14	8	53.838	0.148594
pSyn_Gfp	DN276	15	0	57.424	0
pSyn_Gfp	DN276	16	1	50.95	0.0196271
pSyn_Gfp	DN279	1	6	48.81	0.122926
pSyn_Gfp	DN279	2	5	46.626	0.107236
pSyn_Gfp	DN279	3	5	40.213	0.124338
pSyn_Gfp	DN279	4	2	56.888	0.0351568
pSyn_Gfp	DN279	5	10	70.992	0.140861
pSyn_Gfp	DN279	6	7	62.164	0.112605
pSyn_Gfp	DN279	7	3	51.219	0.058572
pSyn_Gfp	DN279	8	5	53.149	0.0940751
pSyn_Gfp	DN279	9	5	62	0.0806452
pSyn_Gfp	DN279	10	6	52.018	0.115345
pSyn_Gfp	DN279	11	12	50.708	0.236649
pSyn_Gfp	DN279	12	2	58.911	0.0339495
pSyn_Gfp	DN279	13	2	66.666	0.0300003
pSyn_Gfp	DN279	14	4	61.794	0.0647312
pSyn_Gfp	DN282	1	3	47.134	0.0636483
pSyn_Gfp	DN282	2	1	32.711	0.0305708
pSyn_Gfp	DN282	3	5	47.93	0.104319
pSyn_Gfp	DN282	4	4	38.85	0.10296
pSyn_Gfp	DN282	5	6	52.372	0.114565
pSyn_Gfp	DN282	6	11	64.738	0.169916
pSyn_Gfp	DN282	7	5	48.041	0.104078
pSyn_Gfp	DN282	8	6	58.799	0.102043
pSyn_Gfp	DN282	9	5	58.42	0.0855871
pSyn_Gfp	DN282	10	5	55.053	0.0908216
pSyn_Gfp	DN282	11	5	52.918	0.0944858
pSyn_Gfp	DN282	12	5	60.483	0.0826679
pSyn_Gfp	DN282	13	8	54.181	0.147653
pSyn_Gfp	DN282	14	7	63.582	0.110094
pSyn_Gfp	DN282	15	14	50.857	0.275282
pSyn_Gfp	DN282	16	5	43.812	0.114124
pSyn_Gfp	DN282	17	3	56.056	0.0535179
pSyn_Gfp	DN282	18	6	56.535	0.106129
pSyn_Gfp	DN282	19	3	62.456	0.0480338
pSyn_Gfp	DN282	20	11	62.263	0.17667
pSyn_Gfp	DN282	21	2	50.41	0.0396747
pSyn_Gfp	DN282	22	3	51.388	0.0583794
pSyn_Gfp	DN282	23	6	50.382	0.11909
pSyn_Gfp	DN282	24	12	53.894	0.222659
pSyn_Nrg1EGFNrg3_pSyn_Gfp	DN372	1	4	42.456	0.0942152
pSyn_Nrg1EGFNrg3_pSyn_Gfp	DN372	2	3	43.036	0.0697091
pSyn_Nrg1EGFNrg3_pSyn_Gfp	DN372	3	3	52.865	0.0567483
pSyn_Nrg1EGFNrg3_pSyn_Gfp	DN372	4	1	55.469	0.0180281
pSyn_Nrg1EGFNrg3_pSyn_Gfp	DN372	5	9	56.625	0.15894
pSyn_Nrg1EGFNrg3_pSyn_Gfp	DN372	6	4	62.875	0.0636183
pSyn_Nrg1EGFNrg3_pSyn_Gfp	DN372	7	5	61.058	0.0818894
pSyn_Nrg1EGFNrg3_pSyn_Gfp	DN372	8	6	61.588	0.0974216
pSyn_Nrg1EGFNrg3_pSyn_Gfp	DN372	9	4	61.226	0.0653317
pSyn_Nrg1EGFNrg3_pSyn_Gfp	DN372	10	7	59.425	0.117796
pSyn_Nrg1EGFNrg3_pSyn_Gfp	DN372	11	5	58.787	0.0850528
pSyn_Nrg1EGFNrg3_pSyn_Gfp	DN372	12	6	54.6	0.10989
pSyn_Nrg1EGFNrg3_pSyn_Gfp	DN372	13	11	55.796	0.197147
pSyn_Nrg1EGFNrg3_pSyn_Gfp	DN372	14	4	54.017	0.0740508
pSyn_Nrg1EGFNrg3_pSyn_Gfp	DN372	15	3	62.396	0.04808
pSyn_Nrg1EGFNrg3_pSyn_Gfp	DN370	1	5	60.042	0.083275
pSyn_Nrg1EGFNrg3_pSyn_Gfp	DN370	2	7	57.908	0.120881
pSyn_Nrg1EGFNrg3_pSyn_Gfp	DN370	3	3	49.179	0.0610016
pSyn_Nrg1EGFNrg3_pSyn_Gfp	DN370	4	3	48.836	0.0614301
pSyn_Nrg1EGFNrg3_pSyn_Gfp	DN370	5	3	63.452	0.0472798
pSyn_Nrg1EGFNrg3_pSyn_Gfp	DN370	6	3	44.889	0.0668315
pSyn_Nrg1EGFNrg3_pSyn_Gfp	DN370	7	5	62.892	0.0795014
pSyn_Nrg1EGFNrg3_pSyn_Gfp	DN370	8	2	60.704	0.0329468
pSyn_Nrg1EGFNrg3_pSyn_Gfp	DN370	9	3	57.163	0.0524815
pSyn_Nrg1EGFNrg3_pSyn_Gfp	DN370	10	4	43.629	0.0916821
pSyn_Nrg1EGFNrg3_pSyn_Gfp	DN370	11	1	45.769	0.0218488
pSyn_Nrg1EGFNrg3_pSyn_Gfp	DN370	12	6	64.562	0.0929339
pSyn_Nrg1EGFNrg3_pSyn_Gfp	DN370	13	6	52.977	0.113257
pSyn_Nrg1EGFNrg3_pSyn_Gfp	DN370	14	7	60.9	0.114943
pSyn_Nrg1EGFNrg3_pSyn_Gfp	DN370	15	6	60.304	0.0994959
pSyn_Nrg1EGFNrg3_pSyn_Gfp	DN370	16	4	57.106	0.0700452
pSyn_Nrg1EGFNrg3_pSyn_Gfp	DN385	1	4	51.062	0.0783361
pSyn_Nrg1EGFNrg3_pSyn_Gfp	DN385	2	7	55.172	0.126876
pSyn_Nrg1EGFNrg3_pSyn_Gfp	DN385	3	6	56.801	0.105632
pSyn_Nrg1EGFNrg3_pSyn_Gfp	DN385	4	10	54.266	0.184277
pSyn_Nrg1EGFNrg3_pSyn_Gfp	DN385	5	3	54.477	0.0550691
pSyn_Nrg1EGFNrg3_pSyn_Gfp	DN385	6	10	63.059	0.158582
pSyn_Nrg1EGFNrg3_pSyn_Gfp	DN385	7	7	56.362	0.124197
pSyn_Nrg1EGFNrg3_pSyn_Gfp	DN385	8	5	58.543	0.0854073
pSyn_Nrg1EGFNrg3_pSyn_Gfp	DN385	9	2	48.153	0.0415343
pSyn_Nrg1EGFNrg3_pSyn_Gfp	DN385	10	2	62.813	0.0318405
pSyn_Nrg1EGFNrg3_pSyn_Gfp	DN385	11	6	57.573	0.104216
pSyn_Nrg1EGFNrg3_pSyn_Gfp	DN385	12	1	52.875	0.0189125
pSyn_Nrg1EGFNrg3_pSyn_Gfp	DN385	13	8	72.465	0.110398
pSyn_Nrg1EGFNrg3_pSyn_Gfp	DN385	14	7	66.233	0.105687
pSyn_Nrg1EGFNrg3_pSyn_Gfp	DN385	15	9	58.939	0.1527
pSyn_Nrg1EGFNrg3_pSyn_Gfp	DN385	16	5	55.891	0.0894598
pSyn_Nrg1EGFNrg3_pSyn_Gfp	DN356	1	8	42.688	0.187406
pSyn_Nrg1EGFNrg3_pSyn_Gfp	DN356	2	6	53.55	0.112045
pSyn_Nrg1EGFNrg3_pSyn_Gfp	DN356	3	4	50.758	0.0788053
pSyn_Nrg1EGFNrg3_pSyn_Gfp	DN356	4	5	45.071	0.110936
pSyn_Nrg1EGFNrg3_pSyn_Gfp	DN356	5	5	60.299	0.0829201
pSyn_Nrg1EGFNrg3_pSyn_Gfp	DN356	6	5	60.078	0.0832251
pSyn_Nrg1EGFNrg3_pSyn_Gfp	DN356	7	4	67.731	0.0590572
pSyn_Nrg1EGFNrg3_pSyn_Gfp	DN356	8	8	59.663	0.134086
pSyn_Nrg1EGFNrg3_pSyn_Gfp	DN356	9	6	63.088	0.0951053
pSyn_Nrg1EGFNrg3_pSyn_Gfp	DN356	10	8	58.249	0.137341
pSyn_Nrg1EGFNrg3_pSyn_Gfp	DN356	11	5	65.962	0.0758012
pSyn_Nrg1EGFNrg3_pSyn_Gfp	DN379	1	5	51.933	0.0962779
pSyn_Nrg1EGFNrg3_pSyn_Gfp	DN379	2	3	44.308	0.0677079
pSyn_Nrg1EGFNrg3_pSyn_Gfp	DN379	3	6	41.741	0.143744
pSyn_Nrg1EGFNrg3_pSyn_Gfp	DN379	4	5	50.887	0.0982569
pSyn_Nrg1EGFNrg3_pSyn_Gfp	DN379	5	3	52.173	0.057501
pSyn_Nrg1EGFNrg3_pSyn_Gfp	DN379	6	5	58.653	0.0852471
pSyn_Nrg1EGFNrg3_pSyn_Gfp	DN379	7	9	55.54	0.162045
pSyn_Nrg1EGFNrg3_pSyn_Gfp	DN379	8	8	63.801	0.12539
pSyn_Nrg1EGFNrg3_pSyn_Gfp	DN379	9	6	51.987	0.115413
pSyn_Nrg1EGFNrg3_pSyn_Gfp	DN379	10	12	56.559	0.212168
pSyn_Nrg1EGFNrg3_pSyn_Gfp	DN379	11	7	70.735	0.0989609
pSyn_Nrg1EGFNrg3_pSyn_Gfp	DN379	12	2	48.527	0.0412142
pSyn_Nrg1EGFNrg3_pSyn_Gfp	DN379	13	8	66.189	0.120866
pSyn_Nrg1EGFNrg3_pSyn_Gfp	DN379	14	9	55.327	0.162669
pSyn_Nrg1EGFNrg3_pSyn_Gfp	DN379	15	3	59.008	0.0508406
pSyn_Nrg1EGFNrg3_pSyn_Gfp	DN387	1	4	54.116	0.0739153
pSyn_Nrg1EGFNrg3_pSyn_Gfp	DN387	2	4	63.222	0.0632691
pSyn_Nrg1EGFNrg3_pSyn_Gfp	DN387	3	23	61.917	0.371465
pSyn_Nrg1EGFNrg3_pSyn_Gfp	DN387	4	1	54.549	0.0183321
pSyn_Nrg1EGFNrg3_pSyn_Gfp	DN387	5	5	45.91	0.108909
pSyn_Nrg1EGFNrg3_pSyn_Gfp	DN387	6	4	57.619	0.0694215
pSyn_Nrg1EGFNrg3_pSyn_Gfp	DN387	7	1	56.309	0.0177592
pSyn_Nrg1EGFNrg3_pSyn_Gfp	DN387	8	8	54.659	0.146362
pSyn_Nrg1EGFNrg3_pSyn_Gfp	DN387	9	7	55.844	0.125349
pSyn_Nrg1EGFNrg3_pSyn_Gfp	DN387	10	3	51.072	0.0587406
pSyn_Nrg1EGFNrg3_pSyn_Gfp	DN387	11	4	59.72	0.0669792
pSyn_Nrg1EGFNrg3_pSyn_Gfp	DN387	12	6	57.614	0.104141
pSyn_Nrg1EGFNrg3_pSyn_Gfp	DN387	13	14	57.179	0.244845
pSyn_Nrg1EGFNrg3_pSyn_Gfp	DN387	14	11	61.249	0.179595
pSyn_Nrg1EGFNrg3_pSyn_Gfp	DN387	15	3	55.913	0.0536548
pSyn_Nrg1EGFNrg3_pSyn_Gfp	DN387	16	7	64.698	0.108195
pSyn_Nrg1EGFNrg3_pSyn_Gfp	DN387	17	7	59.317	0.11801
pSyn_Nrg1EGFNrg3_pSyn_Gfp	DN387	18	7	61.883	0.113117
pSyn_Nrg1EGFNrg3_pSyn_Gfp	DN387	19	4	61.706	0.0648235
pSyn_Nrg1EGFNrg3_pSyn_Gfp	DN387	20	4	56.413	0.0709056
pSyn_Nrg1EGFNrg3_pSyn_Gfp	DN387	21	3	52.607	0.0570266
pSyn_Nrg3EGFNrg1_pSyn_Gfp	DN366	1	4	49.222	0.0812645
pSyn_Nrg3EGFNrg1_pSyn_Gfp	DN366	2	8	55.717	0.143583
pSyn_Nrg3EGFNrg1_pSyn_Gfp	DN366	3	16	74.551	0.214618
pSyn_Nrg3EGFNrg1_pSyn_Gfp	DN366	4	10	49.12	0.203583
pSyn_Nrg3EGFNrg1_pSyn_Gfp	DN366	5	8	63.191	0.1266
pSyn_Nrg3EGFNrg1_pSyn_Gfp	DN366	6	6	45.736	0.131188
pSyn_Nrg3EGFNrg1_pSyn_Gfp	DN366	7	19	51.017	0.372425
pSyn_Nrg3EGFNrg1_pSyn_Gfp	DN366	8	3	40.513	0.0740503
pSyn_Nrg3EGFNrg1_pSyn_Gfp	DN366	9	11	60.561	0.181635
pSyn_Nrg3EGFNrg1_pSyn_Gfp	DN366	10	4	52.467	0.0762384
pSyn_Nrg3EGFNrg1_pSyn_Gfp	DN366	11	3	37.344	0.0803342
pSyn_Nrg3EGFNrg1_pSyn_Gfp	DN366	12	6	52.777	0.113686
pSyn_Nrg3EGFNrg1_pSyn_Gfp	DN366	13	11	63.903	0.172136
pSyn_Nrg3EGFNrg1_pSyn_Gfp	DN366	14	3	39.841	0.0752993
pSyn_Nrg3EGFNrg1_pSyn_Gfp	DN366	15	10	65.757	0.152075
pSyn_Nrg3EGFNrg1_pSyn_Gfp	DN366	16	10	62.889	0.15901
pSyn_Nrg3EGFNrg1_pSyn_Gfp	DN366	17	12	58.276	0.205917
pSyn_Nrg3EGFNrg1_pSyn_Gfp	DN366	18	7	49.813	0.140526
pSyn_Nrg3EGFNrg1_pSyn_Gfp	DN375	1	10	61.658	0.162185
pSyn_Nrg3EGFNrg1_pSyn_Gfp	DN375	2	5	36.677	0.136325
pSyn_Nrg3EGFNrg1_pSyn_Gfp	DN375	3	4	47.874	0.0835527
pSyn_Nrg3EGFNrg1_pSyn_Gfp	DN375	4	8	49.423	0.161868
pSyn_Nrg3EGFNrg1_pSyn_Gfp	DN375	5	8	52.258	0.153087
pSyn_Nrg3EGFNrg1_pSyn_Gfp	DN375	6	4	51.149	0.0782029
pSyn_Nrg3EGFNrg1_pSyn_Gfp	DN375	7	7	58.833	0.118981
pSyn_Nrg3EGFNrg1_pSyn_Gfp	DN375	8	4	40.676	0.0983381
pSyn_Nrg3EGFNrg1_pSyn_Gfp	DN375	9	6	59.887	0.100189
pSyn_Nrg3EGFNrg1_pSyn_Gfp	DN375	10	4	60.599	0.0660077
pSyn_Nrg3EGFNrg1_pSyn_Gfp	DN375	11	4	57.402	0.069684
pSyn_Nrg3EGFNrg1_pSyn_Gfp	DN375	12	5	47.275	0.105764
pSyn_Nrg3EGFNrg1_pSyn_Gfp	DN375	13	5	51.842	0.0964469
pSyn_Nrg3EGFNrg1_pSyn_Gfp	DN359	1	14	58.423	0.239632
pSyn_Nrg3EGFNrg1_pSyn_Gfp	DN359	2	7	47.372	0.147767
pSyn_Nrg3EGFNrg1_pSyn_Gfp	DN359	3	10	43.312	0.230883
pSyn_Nrg3EGFNrg1_pSyn_Gfp	DN359	4	3	60.247	0.049795
pSyn_Nrg3EGFNrg1_pSyn_Gfp	DN359	5	4	43.195	0.0926033
pSyn_Nrg3EGFNrg1_pSyn_Gfp	DN359	6	14	57.244	0.244567
pSyn_Nrg3EGFNrg1_pSyn_Gfp	DN359	7	7	59.8	0.117057
pSyn_Nrg3EGFNrg1_pSyn_Gfp	DN359	8	7	59.992	0.116682
pSyn_Nrg3EGFNrg1_pSyn_Gfp	DN359	9	9	59.625	0.150943
pSyn_Nrg3EGFNrg1_pSyn_Gfp	DN359	10	8	49.504	0.161603
pSyn_Nrg3EGFNrg1_pSyn_Gfp	DN359	11	8	48.828	0.16384
pSyn_Nrg3EGFNrg1_pSyn_Gfp	DN359	12	7	61.898	0.113089
pSyn_Nrg3EGFNrg1_pSyn_Gfp	DN359	13	11	49.137	0.223864
pSyn_Nrg3EGFNrg1_pSyn_Gfp	DN349	1	4	54.881	0.072885
pSyn_Nrg3EGFNrg1_pSyn_Gfp	DN349	2	12	57.249	0.209611
pSyn_Nrg3EGFNrg1_pSyn_Gfp	DN349	3	3	49.136	0.061055
pSyn_Nrg3EGFNrg1_pSyn_Gfp	DN349	4	5	49.617	0.100772
pSyn_Nrg3EGFNrg1_pSyn_Gfp	DN349	5	13	54.476	0.238637
pSyn_Nrg3EGFNrg1_pSyn_Gfp	DN349	6	5	43.845	0.114038
pSyn_Nrg3EGFNrg1_pSyn_Gfp	DN349	7	14	63.279	0.221242
pSyn_Nrg3EGFNrg1_pSyn_Gfp	DN349	8	8	64.046	0.12491
pSyn_Nrg3EGFNrg1_pSyn_Gfp	DN349	9	7	49.511	0.141383
pSyn_Nrg3EGFNrg1_pSyn_Gfp	DN349	10	9	63.957	0.14072
pSyn_Nrg3EGFNrg1_pSyn_Gfp	DN349	11	6	66.913	0.0896687
pSyn_Nrg3EGFNrg1_pSyn_Gfp	DN349	12	22	55.91	0.39349
pSyn_Nrg3EGFNrg1_pSyn_Gfp	DN349	13	10	68.311	0.146389
pSyn_Nrg3EGFNrg1_pSyn_Gfp	DN349	14	6	52.953	0.113308
pSyn_Nrg3EGFNrg1_pSyn_Gfp	DN349	15	12	59.829	0.200572
pSyn_Nrg3EGFNrg1_pSyn_Gfp	DN349	16	8	63.645	0.125697
pSyn_Nrg3EGFNrg1_pSyn_Gfp	DN349	17	6	55.359	0.108383
pSyn_Nrg3EGFNrg1_pSyn_Gfp	DN349	18	8	58.782	0.136096
pSyn_Nrg3EGFNrg1_pSyn_Gfp	DN349	19	8	47.564	0.168194
pSyn_Nrg3EGFNrg1_pSyn_Gfp	DN349	20	8	59.001	0.135591
pSyn_Nrg3EGFNrg1_pSyn_Gfp	DN374	1	5	57.345	0.0871916
pSyn_Nrg3EGFNrg1_pSyn_Gfp	DN374	2	7	55.152	0.126922
pSyn_Nrg3EGFNrg1_pSyn_Gfp	DN374	3	18	60.331	0.298354
pSyn_Nrg3EGFNrg1_pSyn_Gfp	DN374	4	7	55.834	0.125372
pSyn_Nrg3EGFNrg1_pSyn_Gfp	DN374	5	6	55.188	0.108719
pSyn_Nrg3EGFNrg1_pSyn_Gfp	DN374	6	6	57.135	0.105014
pSyn_Nrg3EGFNrg1_pSyn_Gfp	DN374	7	14	65.111	0.215017
pSyn_Nrg3EGFNrg1_pSyn_Gfp	DN374	8	4	60.785	0.0658057
pSyn_Nrg3EGFNrg1_pSyn_Gfp	DN374	9	10	61.575	0.162404
pSyn_Nrg3EGFNrg1_pSyn_Gfp	DN374	10	7	61.964	0.112969
pSyn_Nrg3EGFNrg1_pSyn_Gfp	DN374	11	6	55.35	0.108401
pSyn_Nrg3EGFNrg1_pSyn_Gfp	DN374	12	7	60.663	0.115392
pSyn_Nrg3EGFNrg1_pSyn_Gfp	DN374	13	6	60.788	0.0987037
pSyn_Nrg3EGFNrg1_pSyn_Gfp	DN374	14	5	63.917	0.0782265
pSyn_Nrg3EGFNrg1_pSyn_Gfp	DN380	1	10	56.44	0.177179
pSyn_Nrg3EGFNrg1_pSyn_Gfp	DN380	2	10	58.125	0.172043
pSyn_Nrg3EGFNrg1_pSyn_Gfp	DN380	3	5	50.122	0.0997566
pSyn_Nrg3EGFNrg1_pSyn_Gfp	DN380	4	4	74.639	0.0535913
pSyn_Nrg3EGFNrg1_pSyn_Gfp	DN380	5	10	53.025	0.18859
pSyn_Nrg3EGFNrg1_pSyn_Gfp	DN380	6	15	55.657	0.269508
pSyn_Nrg3EGFNrg1_pSyn_Gfp	DN380	7	0	57.137	0
pSyn_Nrg3EGFNrg1_pSyn_Gfp	DN380	8	3	51.268	0.058516
pSyn_Nrg3EGFNrg1_pSyn_Gfp	DN380	9	6	50.758	0.118208
pSyn_Nrg3EGFNrg1_pSyn_Gfp	DN380	10	5	50.103	0.0997944
pSyn_Nrg3EGFNrg1_pSyn_Gfp	DN380	11	6	56.589	0.106028
pSyn_Nrg3EGFNrg1_pSyn_Gfp	DN380	12	14	44.59	0.313972
pSyn_Nrg3EGFNrg1_pSyn_Gfp	DN380	13	12	45.887	0.261512
pSyn_Nrg3EGFNrg1_pSyn_Gfp	DN380	14	4	52.699	0.0759028
pSyn_Nrg3EGFNrg1_pSyn_Gfp	DN380	15	14	48.37	0.289436
pSyn_Nrg3EGFNrg1_pSyn_Gfp	DN380	16	6	59.753	0.100413
pSyn_Nrg3EGFNrg1_pSyn_Gfp	DN380	17	8	69.907	0.114438
pSyn_Nrg3EGFNrg1_pSyn_Gfp	DN380	18	8	51.1	0.156556
