# Supplementary material for: Subcellular sorting of neuregulins controls the assembly of excitatory-inhibitory cortical circuits
Source: eLife. 2020 Dec 15;9:e57000. doi: 10.7554/eLife.57000 (PMC7755390; doi:10.7554/eLife.57000)
Supplement: Figure 5—figure supplement 2—source data 1. [file elife-57000-fig5-figsupp2-data1.xlsx]

## Sheet: HA_VGlut1_GFP_PVsoma
Plasmid	Brain	Cell	Count_vglut1_gfp	Count_ha_vglut_gfp	Perimeter_cell	Density_vglut1_gfp	Density_ha_vglut1_gfp	Proportion_ha_vglut1_gfp
pSyn_Nrg1_pSyn_Gfp	DN184	1	14	0	45.419	0.308241	0	0
pSyn_Nrg1_pSyn_Gfp	DN184	2	12	1	42.981	0.279193	0.0232661	0.0833333
pSyn_Nrg1_pSyn_Gfp	DN184	3	25	1	61.751	0.404852	0.0161941	0.04
pSyn_Nrg1_pSyn_Gfp	DN184	4	13	1	62.131	0.209235	0.016095	0.0769231
pSyn_Nrg1_pSyn_Gfp	DN184	5	16	1	47.616	0.336022	0.0210013	0.0625
pSyn_Nrg1_pSyn_Gfp	DN184	6	21	0	43.257	0.485471	0	0
pSyn_Nrg1_pSyn_Gfp	DN184	7	29	2	61.256	0.473423	0.0326499	0.0689655
pSyn_Nrg1_pSyn_Gfp	DN184	8	15	1	49.551	0.302718	0.0201812	0.0666667
pSyn_Nrg1_pSyn_Gfp	DN184	9	15	0	49.768	0.301398	0	0
pSyn_Nrg1_pSyn_Gfp	DN184	10	11	0	49.153	0.223791	0	0
pSyn_Nrg1_pSyn_Gfp	DN185	1	13	0	52.776	0.246324	0	0
pSyn_Nrg1_pSyn_Gfp	DN185	2	10	0	44.295	0.225759	0	0
pSyn_Nrg1_pSyn_Gfp	DN185	3	25	1	53.676	0.465758	0.0186303	0.04
pSyn_Nrg1_pSyn_Gfp	DN185	4	16	0	36.967	0.432818	0	0
pSyn_Nrg1_pSyn_Gfp	DN185	5	13	2	46.993	0.276637	0.0425595	0.153846
pSyn_Nrg1_pSyn_Gfp	DN185	6	15	0	51.297	0.292415	0	0
pSyn_Nrg1_pSyn_Gfp	DN185	7	9	0	45.281	0.198759	0	0
pSyn_Nrg1_pSyn_Gfp	DN185	8	33	2	65.967	0.50025	0.0303182	0.0606061
pSyn_Nrg1_pSyn_Gfp	DN185	9	16	0	53.142	0.30108	0	0
pSyn_Nrg1_pSyn_Gfp	DN185	10	34	1	54.595	0.622768	0.0183167	0.0294118
pSyn_Nrg1_pSyn_Gfp	DN186	1	30	0	54.171	0.553802	0	0
pSyn_Nrg1_pSyn_Gfp	DN186	2	8	0	58.714	0.136254	0	0
pSyn_Nrg1_pSyn_Gfp	DN186	3	22	2	53.231	0.413293	0.0375721	0.0909091
pSyn_Nrg1_pSyn_Gfp	DN186	4	17	0	50.85	0.334317	0	0
pSyn_Nrg1_pSyn_Gfp	DN186	5	29	1	55.149	0.525848	0.0181327	0.0344828
pSyn_Nrg1_pSyn_Gfp	DN186	6	20	4	56.326	0.355076	0.0710152	0.2
pSyn_Nrg1_pSyn_Gfp	DN186	7	19	2	56.435	0.336671	0.035439	0.105263
pSyn_Nrg1_pSyn_Gfp	DN186	8	18	0	58.256	0.308981	0	0
pSyn_Nrg1_pSyn_Gfp	DN186	9	17	0	56.745	0.299586	0	0
pSyn_Nrg1_pSyn_Gfp	DN186	10	24	3	60.875	0.394251	0.0492813	0.125
pSyn_Nrg1_pSyn_Gfp	DN190	1	15	0	50.707	0.295817	0	0
pSyn_Nrg1_pSyn_Gfp	DN190	2	14	1	55.644	0.251599	0.0179714	0.0714286
pSyn_Nrg1_pSyn_Gfp	DN190	3	16	1	46.362	0.34511	0.0215694	0.0625
pSyn_Nrg1_pSyn_Gfp	DN190	4	13	0	56.729	0.22916	0	0
pSyn_Nrg1_pSyn_Gfp	DN190	5	14	0	60.682	0.230711	0	0
pSyn_Nrg1_pSyn_Gfp	DN190	6	16	0	61.437	0.260429	0	0
pSyn_Nrg1_pSyn_Gfp	DN190	7	18	0	64.758	0.277958	0	0
pSyn_Nrg1_pSyn_Gfp	DN190	8	9	1	53.843	0.167153	0.0185725	0.111111
pSyn_Nrg1_pSyn_Gfp	DN190	9	20	2	51.71	0.386772	0.0386772	0.1
pSyn_Nrg1_pSyn_Gfp	DN190	10	16	0	41.989	0.381052	0	0
pSyn_Nrg3_pSyn_Gfp	DN194	1	23	12	52.972	0.434192	0.226535	0.521739
pSyn_Nrg3_pSyn_Gfp	DN194	2	19	11	56.787	0.334584	0.193706	0.578947
pSyn_Nrg3_pSyn_Gfp	DN194	3	16	13	48.039	0.333063	0.270613	0.8125
pSyn_Nrg3_pSyn_Gfp	DN194	4	19	10	53.792	0.353212	0.185901	0.526316
pSyn_Nrg3_pSyn_Gfp	DN194	5	25	15	45.755	0.546388	0.327833	0.6
pSyn_Nrg3_pSyn_Gfp	DN194	6	28	23	53.289	0.525437	0.431609	0.821429
pSyn_Nrg3_pSyn_Gfp	DN194	7	37	24	51.963	0.712045	0.461867	0.648649
pSyn_Nrg3_pSyn_Gfp	DN194	8	28	21	61.965	0.451868	0.338901	0.75
pSyn_Nrg3_pSyn_Gfp	DN194	9	32	31	63.788	0.501662	0.485985	0.96875
pSyn_Nrg3_pSyn_Gfp	DN194	10	26	21	54.661	0.475659	0.384186	0.807692
pSyn_Nrg3_pSyn_Gfp	DN194	11	10	7	42.983	0.23265	0.162855	0.7
pSyn_Nrg3_pSyn_Gfp	DN194	12	21	15	48.445	0.433481	0.309629	0.714286
pSyn_Nrg3_pSyn_Gfp	DN195	1	18	10	60.193	0.299038	0.166132	0.555556
pSyn_Nrg3_pSyn_Gfp	DN195	2	22	21	67.275	0.327016	0.312152	0.954545
pSyn_Nrg3_pSyn_Gfp	DN195	3	29	24	54.011	0.536928	0.444354	0.827586
pSyn_Nrg3_pSyn_Gfp	DN195	4	28	18	52.48	0.533537	0.342988	0.642857
pSyn_Nrg3_pSyn_Gfp	DN195	5	31	22	67.043	0.46239	0.328148	0.709677
pSyn_Nrg3_pSyn_Gfp	DN195	6	23	17	51.267	0.448632	0.331597	0.73913
pSyn_Nrg3_pSyn_Gfp	DN195	7	20	13	49.655	0.402779	0.261806	0.65
pSyn_Nrg3_pSyn_Gfp	DN195	8	20	11	44.582	0.448612	0.246736	0.55
pSyn_Nrg3_pSyn_Gfp	DN195	9	26	18	75.448	0.344608	0.238575	0.692308
pSyn_Nrg3_pSyn_Gfp	DN195	10	28	21	54.807	0.510884	0.383163	0.75
pSyn_Nrg3_pSyn_Gfp	DN195	11	25	13	62.115	0.402479	0.209289	0.52
pSyn_Nrg3_pSyn_Gfp	DN195	12	12	7	48.216	0.24888	0.14518	0.583333
pSyn_Nrg3_pSyn_Gfp	DN195	13	19	10	59.033	0.321854	0.169397	0.526316
pSyn_Nrg3_pSyn_Gfp	DN195	14	19	11	50.988	0.372637	0.215737	0.578947
pSyn_Nrg3_pSyn_Gfp	DN195	15	26	17	49.923	0.520802	0.340524	0.653846
pSyn_Nrg3_pSyn_Gfp	DN195	16	15	11	60.221	0.249083	0.182661	0.733333
pSyn_Nrg3_pSyn_Gfp	DN196	1	16	13	43.948	0.364067	0.295804	0.8125
pSyn_Nrg3_pSyn_Gfp	DN196	2	24	11	58.998	0.406793	0.186447	0.458333
pSyn_Nrg3_pSyn_Gfp	DN196	3	18	12	55.033	0.327076	0.218051	0.666667
pSyn_Nrg3_pSyn_Gfp	DN196	4	28	25	66.628	0.420244	0.375218	0.892857
pSyn_Nrg3_pSyn_Gfp	DN196	5	17	11	49.533	0.343206	0.222074	0.647059
pSyn_Nrg3_pSyn_Gfp	DN196	6	20	15	50.235	0.398129	0.298597	0.75
pSyn_Nrg3_pSyn_Gfp	DN196	7	18	14	50.797	0.354352	0.275607	0.777778
pSyn_Nrg3_pSyn_Gfp	DN196	8	20	13	55.067	0.363194	0.236076	0.65
pSyn_Nrg3_pSyn_Gfp	DN196	9	18	8	51.424	0.350031	0.155569	0.444444
pSyn_Nrg3_pSyn_Gfp	DN196	10	21	12	53.994	0.388932	0.222247	0.571429
pSyn_Nrg3_pSyn_Gfp	DN196	11	29	14	50.109	0.578738	0.279391	0.482759
pSyn_Nrg3_pSyn_Gfp	DN196	12	19	12	50.133	0.378992	0.239363	0.631579
pSyn_Nrg3_pSyn_Gfp	DN197	1	26	24	59.786	0.434884	0.401432	0.923077
pSyn_Nrg3_pSyn_Gfp	DN197	2	28	25	55.571	0.50386	0.449875	0.892857
pSyn_Nrg3_pSyn_Gfp	DN197	3	30	27	53.961	0.555957	0.500361	0.9
pSyn_Nrg3_pSyn_Gfp	DN197	4	46	22	66.887	0.687727	0.328913	0.478261
pSyn_Nrg3_pSyn_Gfp	DN197	5	23	15	62.517	0.3679	0.239935	0.652174
pSyn_Nrg3_pSyn_Gfp	DN197	6	16	12	51.39	0.311345	0.233508	0.75
pSyn_Nrg3_pSyn_Gfp	DN197	7	14	7	56.928	0.245925	0.122962	0.5
pSyn_Nrg3_pSyn_Gfp	DN197	8	21	20	50.251	0.417902	0.398002	0.952381
pSyn_Nrg3_pSyn_Gfp	DN197	9	15	8	63.911	0.234701	0.125174	0.533333
pSyn_Nrg3_pSyn_Gfp	DN197	10	17	11	46.962	0.361995	0.234232	0.647059
pSyn_Nrg1CtNrg3_pSyn_Gfp	DN413	1	19	5	47.635	0.398866	0.104965	0.263158
pSyn_Nrg1CtNrg3_pSyn_Gfp	DN413	2	10	6	34.171	0.292646	0.175587	0.6
pSyn_Nrg1CtNrg3_pSyn_Gfp	DN413	3	9	6	56.396	0.159586	0.106391	0.666667
pSyn_Nrg1CtNrg3_pSyn_Gfp	DN413	4	18	9	43.642	0.412447	0.206223	0.5
pSyn_Nrg1CtNrg3_pSyn_Gfp	DN413	5	16	7	41.614	0.384486	0.168213	0.4375
pSyn_Nrg1CtNrg3_pSyn_Gfp	DN413	6	16	7	38.071	0.420267	0.183867	0.4375
pSyn_Nrg1CtNrg3_pSyn_Gfp	DN413	7	13	6	47.576	0.273247	0.126114	0.461538
pSyn_Nrg1CtNrg3_pSyn_Gfp	DN413	8	22	19	46.735	0.470739	0.406548	0.863636
pSyn_Nrg1CtNrg3_pSyn_Gfp	DN413	9	21	13	45.129	0.465333	0.288063	0.619048
pSyn_Nrg1CtNrg3_pSyn_Gfp	DN413	10	33	13	52.217	0.631978	0.248961	0.393939
pSyn_Nrg1CtNrg3_pSyn_Gfp	DN413	11	22	8	55.616	0.39557	0.143843	0.363636
pSyn_Nrg1CtNrg3_pSyn_Gfp	DN413	12	12	5	50.735	0.236523	0.0985513	0.416667
pSyn_Nrg1CtNrg3_pSyn_Gfp	DN416	1	27	13	57.636	0.468457	0.225553	0.481481
pSyn_Nrg1CtNrg3_pSyn_Gfp	DN416	2	24	9	54.761	0.438268	0.164351	0.375
pSyn_Nrg1CtNrg3_pSyn_Gfp	DN416	3	17	8	50.375	0.337469	0.158809	0.470588
pSyn_Nrg1CtNrg3_pSyn_Gfp	DN416	4	12	5	51.99	0.230814	0.0961723	0.416667
pSyn_Nrg1CtNrg3_pSyn_Gfp	DN416	5	22	10	48.88	0.450082	0.204583	0.454545
pSyn_Nrg1CtNrg3_pSyn_Gfp	DN416	6	24	14	49.192	0.487884	0.284599	0.583333
pSyn_Nrg1CtNrg3_pSyn_Gfp	DN416	7	38	14	86.586	0.43887	0.161689	0.368421
pSyn_Nrg1CtNrg3_pSyn_Gfp	DN416	8	12	5	51.728	0.231983	0.0966594	0.416667
pSyn_Nrg1CtNrg3_pSyn_Gfp	DN416	9	31	13	56.064	0.552939	0.231878	0.419355
pSyn_Nrg1CtNrg3_pSyn_Gfp	DN416	10	24	16	57.979	0.413943	0.275962	0.666667
pSyn_Nrg1CtNrg3_pSyn_Gfp	DN427	1	22	11	46.304	0.475121	0.23756	0.5
pSyn_Nrg1CtNrg3_pSyn_Gfp	DN427	2	24	16	60.434	0.397127	0.264752	0.666667
pSyn_Nrg1CtNrg3_pSyn_Gfp	DN427	3	17	14	42.06	0.404184	0.332858	0.823529
pSyn_Nrg1CtNrg3_pSyn_Gfp	DN427	4	9	5	36.167	0.248846	0.138248	0.555556
pSyn_Nrg1CtNrg3_pSyn_Gfp	DN427	5	17	5	57.821	0.294011	0.0864738	0.294118
pSyn_Nrg1CtNrg3_pSyn_Gfp	DN427	6	21	7	54.624	0.384446	0.128149	0.333333
pSyn_Nrg1CtNrg3_pSyn_Gfp	DN427	7	12	5	46.913	0.255793	0.10658	0.416667
pSyn_Nrg1CtNrg3_pSyn_Gfp	DN427	8	14	5	49.074	0.285283	0.101887	0.357143
pSyn_Nrg1CtNrg3_pSyn_Gfp	DN427	9	12	9	41.313	0.290465	0.217849	0.75
pSyn_Nrg1CtNrg3_pSyn_Gfp	DN427	10	30	12	54.552	0.549934	0.219974	0.4
pSyn_Nrg1CtNrg3_pSyn_Gfp	DN427	11	29	11	66.85	0.433807	0.164547	0.37931
pSyn_Nrg1CtNrg3_pSyn_Gfp	DN427	12	12	6	40.141	0.298946	0.149473	0.5
pSyn_Nrg1CtNrg3_pSyn_Gfp	DN427	13	32	4	59.566	0.537219	0.0671524	0.125
pSyn_Nrg1CtNrg3_pSyn_Gfp	DN427	14	12	4	41.62	0.288323	0.0961076	0.333333
pSyn_Nrg1CtNrg3_pSyn_Gfp	DN431	1	22	8	39.909	0.551254	0.200456	0.363636
pSyn_Nrg1CtNrg3_pSyn_Gfp	DN431	2	22	7	46.998	0.468105	0.148943	0.318182
pSyn_Nrg1CtNrg3_pSyn_Gfp	DN431	3	6	2	44.414	0.135093	0.0450308	0.333333
pSyn_Nrg1CtNrg3_pSyn_Gfp	DN431	4	16	7	39.174	0.408434	0.17869	0.4375
pSyn_Nrg1CtNrg3_pSyn_Gfp	DN431	5	23	6	55.342	0.415598	0.108417	0.26087
pSyn_Nrg1CtNrg3_pSyn_Gfp	DN431	6	17	9	52.158	0.325933	0.172553	0.529412
pSyn_Nrg1CtNrg3_pSyn_Gfp	DN431	7	22	10	50.231	0.437977	0.19908	0.454545
pSyn_Nrg1CtNrg3_pSyn_Gfp	DN431	8	12	5	35.166	0.341239	0.142183	0.416667
pSyn_Nrg1CtNrg3_pSyn_Gfp	DN431	9	18	9	49.692	0.362231	0.181116	0.5
pSyn_Nrg1CtNrg3_pSyn_Gfp	DN431	10	33	15	61.011	0.540886	0.245857	0.454545
pSyn_Nrg1CtNrg3_pSyn_Gfp	DN431	11	25	11	43.166	0.57916	0.25483	0.44
pSyn_Nrg1CtNrg3_pSyn_Gfp	DN431	12	24	9	42.378	0.566332	0.212374	0.375
pSyn_Nrg1CtNrg3_pSyn_Gfp	DN431	13	19	7	42.789	0.444039	0.163593	0.368421
pSyn_Nrg1CtNrg3_pSyn_Gfp	DN431	14	21	8	50.645	0.414651	0.157962	0.380952
pSyn_Nrg3CtNrg1_pSyn_Gfp	DN406	1	22	2	59.605	0.369097	0.0335542	0.0909091
pSyn_Nrg3CtNrg1_pSyn_Gfp	DN406	2	10	1	43.141	0.231798	0.0231798	0.1
pSyn_Nrg3CtNrg1_pSyn_Gfp	DN406	3	22	3	42.098	0.52259	0.0712623	0.136364
pSyn_Nrg3CtNrg1_pSyn_Gfp	DN406	4	23	4	55.055	0.417764	0.0726546	0.173913
pSyn_Nrg3CtNrg1_pSyn_Gfp	DN406	5	24	6	67.141	0.357457	0.0893642	0.25
pSyn_Nrg3CtNrg1_pSyn_Gfp	DN406	6	24	5	55.951	0.428947	0.0893639	0.208333
pSyn_Nrg3CtNrg1_pSyn_Gfp	DN406	7	21	1	49.866	0.421129	0.0200537	0.047619
pSyn_Nrg3CtNrg1_pSyn_Gfp	DN406	8	21	6	56.082	0.374452	0.106986	0.285714
pSyn_Nrg3CtNrg1_pSyn_Gfp	DN406	9	31	7	50.9	0.609037	0.137525	0.225806
pSyn_Nrg3CtNrg1_pSyn_Gfp	DN406	10	22	12	47.971	0.45861	0.250151	0.545455
pSyn_Nrg3CtNrg1_pSyn_Gfp	DN406	11	15	3	52.099	0.287913	0.0575827	0.2
pSyn_Nrg3CtNrg1_pSyn_Gfp	DN406	12	27	2	45.186	0.59753	0.0442615	0.0740741
pSyn_Nrg3CtNrg1_pSyn_Gfp	DN406	13	29	9	56.376	0.514403	0.159642	0.310345
pSyn_Nrg3CtNrg1_pSyn_Gfp	DN419	1	20	1	58.211	0.343578	0.0171789	0.05
pSyn_Nrg3CtNrg1_pSyn_Gfp	DN419	2	21	2	61.238	0.342924	0.0326595	0.0952381
pSyn_Nrg3CtNrg1_pSyn_Gfp	DN419	3	14	1	64.691	0.216413	0.0154581	0.0714286
pSyn_Nrg3CtNrg1_pSyn_Gfp	DN419	4	31	4	59.64	0.519785	0.0670691	0.129032
pSyn_Nrg3CtNrg1_pSyn_Gfp	DN419	5	33	5	68.061	0.484859	0.0734635	0.151515
pSyn_Nrg3CtNrg1_pSyn_Gfp	DN419	6	27	4	67.602	0.399396	0.0591698	0.148148
pSyn_Nrg3CtNrg1_pSyn_Gfp	DN419	7	32	1	60.854	0.525849	0.0164328	0.03125
pSyn_Nrg3CtNrg1_pSyn_Gfp	DN419	8	19	1	57.941	0.32792	0.0172589	0.0526316
pSyn_Nrg3CtNrg1_pSyn_Gfp	DN419	9	26	6	53.218	0.488557	0.112744	0.230769
pSyn_Nrg3CtNrg1_pSyn_Gfp	DN419	10	25	5	49.305	0.507048	0.10141	0.2
pSyn_Nrg3CtNrg1_pSyn_Gfp	DN437	1	17	4	43.903	0.387217	0.0911099	0.235294
pSyn_Nrg3CtNrg1_pSyn_Gfp	DN437	2	22	1	45.403	0.484549	0.022025	0.0454545
pSyn_Nrg3CtNrg1_pSyn_Gfp	DN437	3	17	4	54.487	0.312001	0.073412	0.235294
pSyn_Nrg3CtNrg1_pSyn_Gfp	DN437	4	26	5	43.066	0.603725	0.116101	0.192308
pSyn_Nrg3CtNrg1_pSyn_Gfp	DN437	5	26	1	56.165	0.462922	0.0178047	0.0384615
pSyn_Nrg3CtNrg1_pSyn_Gfp	DN437	6	31	7	75.234	0.412048	0.093043	0.225806
pSyn_Nrg3CtNrg1_pSyn_Gfp	DN437	7	24	5	50.157	0.478498	0.099687	0.208333
pSyn_Nrg3CtNrg1_pSyn_Gfp	DN437	8	23	13	53.238	0.432022	0.244186	0.565217
pSyn_Nrg3CtNrg1_pSyn_Gfp	DN437	9	11	3	50.137	0.219399	0.059836	0.272727
pSyn_Nrg3CtNrg1_pSyn_Gfp	DN449	1	16	1	47.994	0.333375	0.0208359	0.0625
pSyn_Nrg3CtNrg1_pSyn_Gfp	DN449	2	23	0	57.348	0.40106	0	0
pSyn_Nrg3CtNrg1_pSyn_Gfp	DN449	3	26	12	55.602	0.467609	0.21582	0.461538
pSyn_Nrg3CtNrg1_pSyn_Gfp	DN449	4	24	3	54.418	0.441031	0.0551288	0.125
pSyn_Nrg3CtNrg1_pSyn_Gfp	DN449	5	27	2	43.6	0.619266	0.0458716	0.0740741
pSyn_Nrg3CtNrg1_pSyn_Gfp	DN449	6	28	1	47.85	0.585162	0.0208986	0.0357143
pSyn_Nrg3CtNrg1_pSyn_Gfp	DN449	7	12	4	37.888	0.316723	0.105574	0.333333
pSyn_Nrg3CtNrg1_pSyn_Gfp	DN449	8	27	0	54.264	0.497567	0	0
pSyn_Nrg3CtNrg1_pSyn_Gfp	DN449	9	22	6	50.671	0.434173	0.118411	0.272727
pSyn_Nrg3CtNrg1_pSyn_Gfp	DN449	10	28	7	50.517	0.554269	0.138567	0.25

## Sheet: Intensity_HA_VGlut1_GFP
Plasmid	Brain	Cell	Count_vglut_ha_gfp	Perimeter_cell	Intensity_ha
pSyn_Nrg3_pSyn_Gfp	DN194	1	12	52.972	149.176
pSyn_Nrg3_pSyn_Gfp	DN194	2	11	56.787	174.639
pSyn_Nrg3_pSyn_Gfp	DN194	3	13	48.039	168.596
pSyn_Nrg3_pSyn_Gfp	DN194	4	10	53.792	185.162
pSyn_Nrg3_pSyn_Gfp	DN194	5	15	45.755	207.499
pSyn_Nrg3_pSyn_Gfp	DN194	6	23	53.289	178.81
pSyn_Nrg3_pSyn_Gfp	DN194	7	24	51.963	134.583
pSyn_Nrg3_pSyn_Gfp	DN194	8	21	61.965	178.229
pSyn_Nrg3_pSyn_Gfp	DN194	9	31	63.788	151.011
pSyn_Nrg3_pSyn_Gfp	DN194	10	21	54.661	179.376
pSyn_Nrg3_pSyn_Gfp	DN194	11	7	42.983	201.094
pSyn_Nrg3_pSyn_Gfp	DN194	12	15	48.445	169.393
pSyn_Nrg3_pSyn_Gfp	DN195	1	10	60.193	179.23
pSyn_Nrg3_pSyn_Gfp	DN195	2	21	67.275	176.537
pSyn_Nrg3_pSyn_Gfp	DN195	3	24	54.011	190.189
pSyn_Nrg3_pSyn_Gfp	DN195	4	18	52.48	172.673
pSyn_Nrg3_pSyn_Gfp	DN195	5	22	67.043	161.921
pSyn_Nrg3_pSyn_Gfp	DN195	6	17	51.267	177.934
pSyn_Nrg3_pSyn_Gfp	DN195	7	13	49.655	184.044
pSyn_Nrg3_pSyn_Gfp	DN195	8	11	44.582	197.527
pSyn_Nrg3_pSyn_Gfp	DN195	9	18	75.448	160.794
pSyn_Nrg3_pSyn_Gfp	DN195	10	21	54.807	177.357
pSyn_Nrg3_pSyn_Gfp	DN195	11	13	62.115	192.389
pSyn_Nrg3_pSyn_Gfp	DN195	12	7	48.216	156.813
pSyn_Nrg3_pSyn_Gfp	DN195	13	10	59.033	147.834
pSyn_Nrg3_pSyn_Gfp	DN195	14	11	50.988	146.23
pSyn_Nrg3_pSyn_Gfp	DN195	15	17	49.923	196.121
pSyn_Nrg3_pSyn_Gfp	DN195	16	11	60.221	186.596
pSyn_Nrg3_pSyn_Gfp	DN196	1	13	43.948	125.71
pSyn_Nrg3_pSyn_Gfp	DN196	2	11	58.998	164.998
pSyn_Nrg3_pSyn_Gfp	DN196	3	12	55.033	139.499
pSyn_Nrg3_pSyn_Gfp	DN196	4	25	66.628	178.291
pSyn_Nrg3_pSyn_Gfp	DN196	5	11	49.533	160.07
pSyn_Nrg3_pSyn_Gfp	DN196	6	15	50.235	165.354
pSyn_Nrg3_pSyn_Gfp	DN196	7	14	50.797	141.248
pSyn_Nrg3_pSyn_Gfp	DN196	8	13	55.067	145.148
pSyn_Nrg3_pSyn_Gfp	DN196	9	8	51.424	171.473
pSyn_Nrg3_pSyn_Gfp	DN196	10	12	53.994	157.091
pSyn_Nrg3_pSyn_Gfp	DN196	11	14	50.109	162.749
pSyn_Nrg3_pSyn_Gfp	DN196	12	12	50.133	211.412
pSyn_Nrg3_pSyn_Gfp	DN197	1	24	59.786	160.484
pSyn_Nrg3_pSyn_Gfp	DN197	2	25	55.571	166.837
pSyn_Nrg3_pSyn_Gfp	DN197	3	27	53.961	165.202
pSyn_Nrg3_pSyn_Gfp	DN197	4	22	66.887	152.833
pSyn_Nrg3_pSyn_Gfp	DN197	5	15	62.517	149.938
pSyn_Nrg3_pSyn_Gfp	DN197	6	12	51.39	162.545
pSyn_Nrg3_pSyn_Gfp	DN197	7	7	56.928	157.957
pSyn_Nrg3_pSyn_Gfp	DN197	8	20	50.251	154.45
pSyn_Nrg3_pSyn_Gfp	DN197	9	8	63.911	166.222
pSyn_Nrg3_pSyn_Gfp	DN197	10	11	46.962	143.091
pSyn_Nrg1CtNrg3_pSyn_Gfp	DN413	1	5	47.635	75.053
pSyn_Nrg1CtNrg3_pSyn_Gfp	DN413	2	6	34.171	61.924
pSyn_Nrg1CtNrg3_pSyn_Gfp	DN413	3	9	43.642	67.809
pSyn_Nrg1CtNrg3_pSyn_Gfp	DN413	4	5	39.641	68.319
pSyn_Nrg1CtNrg3_pSyn_Gfp	DN413	5	7	41.614	87.537
pSyn_Nrg1CtNrg3_pSyn_Gfp	DN413	6	7	38.071	82.252
pSyn_Nrg1CtNrg3_pSyn_Gfp	DN413	7	6	47.576	54.088
pSyn_Nrg1CtNrg3_pSyn_Gfp	DN413	8	19	46.735	69.921
pSyn_Nrg1CtNrg3_pSyn_Gfp	DN413	9	13	45.129	73.275
pSyn_Nrg1CtNrg3_pSyn_Gfp	DN413	10	13	52.217	69.476
pSyn_Nrg1CtNrg3_pSyn_Gfp	DN413	11	8	55.616	100.649
pSyn_Nrg1CtNrg3_pSyn_Gfp	DN413	12	5	50.735	118.251
pSyn_Nrg1CtNrg3_pSyn_Gfp	DN416	1	13	57.636	74.692
pSyn_Nrg1CtNrg3_pSyn_Gfp	DN416	2	9	54.761	77.738
pSyn_Nrg1CtNrg3_pSyn_Gfp	DN416	3	5	51.99	73.275
pSyn_Nrg1CtNrg3_pSyn_Gfp	DN416	4	10	48.88	71.054
pSyn_Nrg1CtNrg3_pSyn_Gfp	DN416	5	14	49.192	67.775
pSyn_Nrg1CtNrg3_pSyn_Gfp	DN416	6	14	86.586	69.885
pSyn_Nrg1CtNrg3_pSyn_Gfp	DN416	7	5	51.728	64.432
pSyn_Nrg1CtNrg3_pSyn_Gfp	DN416	8	13	56.064	73.278
pSyn_Nrg1CtNrg3_pSyn_Gfp	DN416	9	16	57.979	64.182
pSyn_Nrg1CtNrg3_pSyn_Gfp	DN427	1	11	46.304	109.414
pSyn_Nrg1CtNrg3_pSyn_Gfp	DN427	2	16	60.434	119.789
pSyn_Nrg1CtNrg3_pSyn_Gfp	DN427	3	14	42.06	111.823
pSyn_Nrg1CtNrg3_pSyn_Gfp	DN427	4	5	36.167	99.845
pSyn_Nrg1CtNrg3_pSyn_Gfp	DN427	5	5	57.821	106.183
pSyn_Nrg1CtNrg3_pSyn_Gfp	DN427	6	7	54.624	117.144
pSyn_Nrg1CtNrg3_pSyn_Gfp	DN427	7	5	46.913	86.908
pSyn_Nrg1CtNrg3_pSyn_Gfp	DN427	8	5	49.074	105.683
pSyn_Nrg1CtNrg3_pSyn_Gfp	DN427	9	9	41.313	107.637
pSyn_Nrg1CtNrg3_pSyn_Gfp	DN427	10	12	54.552	114.955
pSyn_Nrg1CtNrg3_pSyn_Gfp	DN427	11	11	66.85	74.046
pSyn_Nrg1CtNrg3_pSyn_Gfp	DN427	12	6	40.141	62.454
pSyn_Nrg1CtNrg3_pSyn_Gfp	DN427	13	4	59.566	63.517
pSyn_Nrg1CtNrg3_pSyn_Gfp	DN427	14	4	41.62	57.265
pSyn_Nrg1CtNrg3_pSyn_Gfp	DN431	1	8	39.909	65.309
pSyn_Nrg1CtNrg3_pSyn_Gfp	DN431	2	7	46.998	107.326
pSyn_Nrg1CtNrg3_pSyn_Gfp	DN431	3	2	44.414	62.21
pSyn_Nrg1CtNrg3_pSyn_Gfp	DN431	4	7	39.174	112.354
pSyn_Nrg1CtNrg3_pSyn_Gfp	DN431	5	9	52.158	70.017
pSyn_Nrg1CtNrg3_pSyn_Gfp	DN431	6	10	50.231	85.81
pSyn_Nrg1CtNrg3_pSyn_Gfp	DN431	7	8	48.788	83.316
pSyn_Nrg1CtNrg3_pSyn_Gfp	DN431	8	5	35.166	65.211
pSyn_Nrg1CtNrg3_pSyn_Gfp	DN431	9	9	49.692	68.684
pSyn_Nrg1CtNrg3_pSyn_Gfp	DN431	10	15	61.011	74.28
pSyn_Nrg1CtNrg3_pSyn_Gfp	DN431	11	11	43.166	94.003
pSyn_Nrg1CtNrg3_pSyn_Gfp	DN431	12	9	42.378	98.599
pSyn_Nrg1CtNrg3_pSyn_Gfp	DN431	13	7	42.789	108.391
pSyn_Nrg1CtNrg3_pSyn_Gfp	DN431	14	8	50.645	100.943
pSyn_Nrg3CtNrg1_pSyn_Gfp	DN406	1	2	59.605	73.318
pSyn_Nrg3CtNrg1_pSyn_Gfp	DN406	2	1	43.141	67.214
pSyn_Nrg3CtNrg1_pSyn_Gfp	DN406	3	3	42.098	43.25
pSyn_Nrg3CtNrg1_pSyn_Gfp	DN406	4	4	55.055	67.868
pSyn_Nrg3CtNrg1_pSyn_Gfp	DN406	5	6	67.141	48.872
pSyn_Nrg3CtNrg1_pSyn_Gfp	DN406	6	5	55.951	70.045
pSyn_Nrg3CtNrg1_pSyn_Gfp	DN406	7	1	49.866	75.615
pSyn_Nrg3CtNrg1_pSyn_Gfp	DN406	8	6	56.082	69.731
pSyn_Nrg3CtNrg1_pSyn_Gfp	DN406	9	7	50.9	67.328
pSyn_Nrg3CtNrg1_pSyn_Gfp	DN406	10	12	47.971	45.471
pSyn_Nrg3CtNrg1_pSyn_Gfp	DN406	11	3	52.099	48.533
pSyn_Nrg3CtNrg1_pSyn_Gfp	DN406	12	2	45.186	66.949
pSyn_Nrg3CtNrg1_pSyn_Gfp	DN406	13	9	56.376	50.008
pSyn_Nrg3CtNrg1_pSyn_Gfp	DN419	1	1	58.211	67.059
pSyn_Nrg3CtNrg1_pSyn_Gfp	DN419	2	2	61.238	80.25
pSyn_Nrg3CtNrg1_pSyn_Gfp	DN419	3	1	64.691	78.756
pSyn_Nrg3CtNrg1_pSyn_Gfp	DN419	4	4	59.64	72.628
pSyn_Nrg3CtNrg1_pSyn_Gfp	DN419	5	5	68.061	68.049
pSyn_Nrg3CtNrg1_pSyn_Gfp	DN419	6	4	67.602	64.141
pSyn_Nrg3CtNrg1_pSyn_Gfp	DN419	7	1	60.854	71.179
pSyn_Nrg3CtNrg1_pSyn_Gfp	DN419	8	1	57.941	54.913
pSyn_Nrg3CtNrg1_pSyn_Gfp	DN419	9	6	53.218	72.718
pSyn_Nrg3CtNrg1_pSyn_Gfp	DN419	10	5	49.305	69.394
pSyn_Nrg3CtNrg1_pSyn_Gfp	DN437	1	4	43.903	38.676
pSyn_Nrg3CtNrg1_pSyn_Gfp	DN437	2	1	45.403	83.333
pSyn_Nrg3CtNrg1_pSyn_Gfp	DN437	3	4	54.487	47.453
pSyn_Nrg3CtNrg1_pSyn_Gfp	DN437	4	5	43.066	46.462
pSyn_Nrg3CtNrg1_pSyn_Gfp	DN437	5	1	56.165	51.435
pSyn_Nrg3CtNrg1_pSyn_Gfp	DN437	6	7	75.234	44.95
pSyn_Nrg3CtNrg1_pSyn_Gfp	DN437	7	5	50.157	40.473
pSyn_Nrg3CtNrg1_pSyn_Gfp	DN437	8	13	53.238	43.174
pSyn_Nrg3CtNrg1_pSyn_Gfp	DN437	9	3	50.137	25.6
pSyn_Nrg3CtNrg1_pSyn_Gfp	DN449	1	1	47.994	59.282
pSyn_Nrg3CtNrg1_pSyn_Gfp	DN449	2	0	57.348	17.673
pSyn_Nrg3CtNrg1_pSyn_Gfp	DN449	3	12	55.602	86.036
pSyn_Nrg3CtNrg1_pSyn_Gfp	DN449	4	3	54.418	57.121
pSyn_Nrg3CtNrg1_pSyn_Gfp	DN449	5	2	43.6	47.044
pSyn_Nrg3CtNrg1_pSyn_Gfp	DN449	6	1	47.85	75.815
pSyn_Nrg3CtNrg1_pSyn_Gfp	DN449	7	4	37.888	81.786
pSyn_Nrg3CtNrg1_pSyn_Gfp	DN449	8	0	54.264	17.359
pSyn_Nrg3CtNrg1_pSyn_Gfp	DN449	9	6	50.671	70.068
pSyn_Nrg3CtNrg1_pSyn_Gfp	DN449	10	7	50.517	77.603
