# Supplementary material for: Subcellular sorting of neuregulins controls the assembly of excitatory-inhibitory cortical circuits
Source: eLife. 2020 Dec 15;9:e57000. doi: 10.7554/eLife.57000 (PMC7755390; doi:10.7554/eLife.57000)
Supplement: Figure 5—figure supplement 3—source data 1. [file elife-57000-fig5-figsupp3-data1.xlsx]

## Sheet: HA_GAD65_GFPsoma
Plasmid	Brain	Cell	Count_gad65	Count_gad65_ha	Perimeter_cell	Density_gad65	Density_gad65_ha	Proportion_ha_gad65
pSyn_Nrg1_pSyn_Gfp	DN185	1	3	2	46.208	0.0649238	0.0432825	0.666667
pSyn_Nrg1_pSyn_Gfp	DN185	2	10	6	47.572	0.210208	0.126125	0.6
pSyn_Nrg1_pSyn_Gfp	DN185	3	10	2	49.884	0.200465	0.040093	0.2
pSyn_Nrg1_pSyn_Gfp	DN185	4	3	2	43.349	0.0692057	0.0461372	0.666667
pSyn_Nrg1_pSyn_Gfp	DN186	1	10	5	44.939	0.222524	0.111262	0.5
pSyn_Nrg1_pSyn_Gfp	DN186	2	16	5	50.303	0.318072	0.0993977	0.3125
pSyn_Nrg1_pSyn_Gfp	DN186	3	12	5	42.806	0.280335	0.116806	0.416667
pSyn_Nrg1_pSyn_Gfp	DN186	4	17	8	36.446	0.466444	0.219503	0.470588
pSyn_Nrg1_pSyn_Gfp	DN186	5	15	14	49.685	0.301902	0.281775	0.933333
pSyn_Nrg1_pSyn_Gfp	DN186	6	16	15	42.359	0.377724	0.354116	0.9375
pSyn_Nrg1_pSyn_Gfp	DN186	7	9	4	35.245	0.255355	0.113491	0.444444
pSyn_Nrg1_pSyn_Gfp	DN186	8	16	10	40.158	0.398426	0.249016	0.625
pSyn_Nrg1_pSyn_Gfp	DN186	9	21	17	51.951	0.404227	0.327231	0.809524
pSyn_Nrg1_pSyn_Gfp	DN186	10	18	11	45.233	0.39794	0.243185	0.611111
pSyn_Nrg1_pSyn_Gfp	DN186	11	10	5	41.836	0.239029	0.119514	0.5
pSyn_Nrg1_pSyn_Gfp	DN186	12	12	2	56.18	0.213599	0.0355999	0.166667
pSyn_Nrg1_pSyn_Gfp	DN190	1	11	8	46.938	0.234352	0.170438	0.727273
pSyn_Nrg1_pSyn_Gfp	DN190	2	12	9	44.222	0.271358	0.203519	0.75
pSyn_Nrg1_pSyn_Gfp	DN190	3	16	16	47.229	0.338775	0.338775	1
pSyn_Nrg1_pSyn_Gfp	DN190	4	16	12	51.952	0.307977	0.230982	0.75
pSyn_Nrg1_pSyn_Gfp	DN190	5	11	7	36.721	0.299556	0.190627	0.636364
pSyn_Nrg1_pSyn_Gfp	DN190	6	18	11	47.805	0.37653	0.230101	0.611111
pSyn_Nrg1_pSyn_Gfp	DN190	7	10	6	44.508	0.224679	0.134807	0.6
pSyn_Nrg1_pSyn_Gfp	DN190	8	13	3	43.171	0.301128	0.0694911	0.230769
pSyn_Nrg1_pSyn_Gfp	DN193	1	16	5	33.746	0.47413	0.148166	0.3125
pSyn_Nrg1_pSyn_Gfp	DN193	2	8	8	32.991	0.24249	0.24249	1
pSyn_Nrg1_pSyn_Gfp	DN193	3	14	9	41.781	0.335081	0.215409	0.642857
pSyn_Nrg1_pSyn_Gfp	DN193	4	12	11	44.109	0.272053	0.249382	0.916667
pSyn_Nrg1_pSyn_Gfp	DN193	5	5	4	31.82	0.157134	0.125707	0.8
pSyn_Nrg1_pSyn_Gfp	DN193	6	12	7	35.899	0.334271	0.194992	0.583333
pSyn_Nrg1_pSyn_Gfp	DN193	7	15	7	45.08	0.332742	0.15528	0.466667
pSyn_Nrg1_pSyn_Gfp	DN193	8	11	3	44.515	0.247108	0.067393	0.272727
pSyn_Nrg1_pSyn_Gfp	DN193	9	8	8	49.85	0.160481	0.160481	1
pSyn_Nrg1_pSyn_Gfp	DN193	10	17	13	49.836	0.341119	0.260856	0.764706
pSyn_Nrg3_pSyn_Gfp	DN194	1	19	0	46.661	0.407192	0	0
pSyn_Nrg3_pSyn_Gfp	DN194	2	19	1	44.822	0.423899	0.0223105	0.0526316
pSyn_Nrg3_pSyn_Gfp	DN194	3	12	1	36.579	0.328057	0.0273381	0.0833333
pSyn_Nrg3_pSyn_Gfp	DN194	4	12	2	45.685	0.262668	0.043778	0.166667
pSyn_Nrg3_pSyn_Gfp	DN194	5	17	0	41.204	0.412581	0	0
pSyn_Nrg3_pSyn_Gfp	DN194	6	23	1	49.578	0.463915	0.0201702	0.0434783
pSyn_Nrg3_pSyn_Gfp	DN194	7	16	0	46.89	0.341224	0	0
pSyn_Nrg3_pSyn_Gfp	DN194	8	12	1	44.659	0.268703	0.0223919	0.0833333
pSyn_Nrg3_pSyn_Gfp	DN195	1	14	0	48.872	0.286463	0	0
pSyn_Nrg3_pSyn_Gfp	DN195	2	23	2	47.348	0.485765	0.0422404	0.0869565
pSyn_Nrg3_pSyn_Gfp	DN195	3	17	0	46.683	0.364158	0	0
pSyn_Nrg3_pSyn_Gfp	DN195	4	23	0	43.263	0.531632	0	0
pSyn_Nrg3_pSyn_Gfp	DN195	5	31	0	55.422	0.559345	0	0
pSyn_Nrg3_pSyn_Gfp	DN195	6	25	1	56.124	0.445442	0.0178177	0.04
pSyn_Nrg3_pSyn_Gfp	DN195	7	16	0	39.808	0.401929	0	0
pSyn_Nrg3_pSyn_Gfp	DN195	8	23	0	42.715	0.538453	0	0
pSyn_Nrg3_pSyn_Gfp	DN196	1	12	0	36.812	0.325981	0	0
pSyn_Nrg3_pSyn_Gfp	DN196	2	21	1	52.086	0.403179	0.019199	0.047619
pSyn_Nrg3_pSyn_Gfp	DN196	3	19	0	45.132	0.420987	0	0
pSyn_Nrg3_pSyn_Gfp	DN196	4	9	0	38.874	0.231517	0	0
pSyn_Nrg3_pSyn_Gfp	DN196	5	14	0	48.401	0.28925	0	0
pSyn_Nrg3_pSyn_Gfp	DN196	6	20	1	53.77	0.371955	0.0185977	0.05
pSyn_Nrg3_pSyn_Gfp	DN196	7	15	0	41.8	0.358852	0	0
pSyn_Nrg3_pSyn_Gfp	DN196	8	21	0	48.317	0.43463	0	0
pSyn_Nrg3_pSyn_Gfp	DN197	1	17	0	42.157	0.403255	0	0
pSyn_Nrg3_pSyn_Gfp	DN197	2	15	0	40.797	0.367674	0	0
pSyn_Nrg3_pSyn_Gfp	DN197	3	27	2	57.44	0.470056	0.0348189	0.0740741
pSyn_Nrg3_pSyn_Gfp	DN197	4	23	0	38.759	0.593411	0	0
pSyn_Nrg3_pSyn_Gfp	DN197	5	20	3	52.477	0.381119	0.0571679	0.15
pSyn_Nrg3_pSyn_Gfp	DN197	6	26	0	51.914	0.500828	0	0
pSyn_Nrg3_pSyn_Gfp	DN197	7	25	1	53.627	0.466183	0.0186473	0.04
pSyn_Nrg3_pSyn_Gfp	DN197	8	18	0	53.405	0.337047	0	0
pSyn_Nrg1CtNrg3_pSyn_Gfp	DN413	1	12	1	31.5	0.380952	0.031746	0.0833333
pSyn_Nrg1CtNrg3_pSyn_Gfp	DN413	2	17	2	41.837	0.406339	0.0478046	0.117647
pSyn_Nrg1CtNrg3_pSyn_Gfp	DN413	3	16	0	36.785	0.43496	0	0
pSyn_Nrg1CtNrg3_pSyn_Gfp	DN413	4	6	0	33.061	0.181483	0	0
pSyn_Nrg1CtNrg3_pSyn_Gfp	DN413	5	15	0	34.999	0.428584	0	0
pSyn_Nrg1CtNrg3_pSyn_Gfp	DN413	6	23	0	48.074	0.478429	0	0
pSyn_Nrg1CtNrg3_pSyn_Gfp	DN413	7	20	0	41.933	0.476951	0	0
pSyn_Nrg1CtNrg3_pSyn_Gfp	DN413	8	21	0	48.907	0.429386	0	0
pSyn_Nrg1CtNrg3_pSyn_Gfp	DN416	1	17	0	47.307	0.359355	0	0
pSyn_Nrg1CtNrg3_pSyn_Gfp	DN416	2	14	2	41.765	0.335209	0.047887	0.142857
pSyn_Nrg1CtNrg3_pSyn_Gfp	DN416	3	9	0	34.884	0.257998	0	0
pSyn_Nrg1CtNrg3_pSyn_Gfp	DN416	4	14	0	38.206	0.366435	0	0
pSyn_Nrg1CtNrg3_pSyn_Gfp	DN416	5	12	0	31.334	0.382971	0	0
pSyn_Nrg1CtNrg3_pSyn_Gfp	DN416	6	11	0	34.415	0.319628	0	0
pSyn_Nrg1CtNrg3_pSyn_Gfp	DN416	7	13	0	36.335	0.357782	0	0
pSyn_Nrg1CtNrg3_pSyn_Gfp	DN416	8	11	0	38.681	0.284377	0	0
pSyn_Nrg1CtNrg3_pSyn_Gfp	DN430	1	10	0	33.78	0.296033	0	0
pSyn_Nrg1CtNrg3_pSyn_Gfp	DN430	2	11	0	35.148	0.312962	0	0
pSyn_Nrg1CtNrg3_pSyn_Gfp	DN430	3	9	0	35.726	0.251917	0	0
pSyn_Nrg1CtNrg3_pSyn_Gfp	DN430	4	19	0	39.089	0.48607	0	0
pSyn_Nrg1CtNrg3_pSyn_Gfp	DN430	5	13	3	34.382	0.378105	0.087255	0.230769
pSyn_Nrg1CtNrg3_pSyn_Gfp	DN430	6	17	0	41.138	0.413243	0	0
pSyn_Nrg1CtNrg3_pSyn_Gfp	DN430	7	13	1	35.462	0.36659	0.0281992	0.0769231
pSyn_Nrg1CtNrg3_pSyn_Gfp	DN430	8	12	0	39.471	0.304021	0	0
pSyn_Nrg1CtNrg3_pSyn_Gfp	DN431	1	13	0	39.939	0.325496	0	0
pSyn_Nrg1CtNrg3_pSyn_Gfp	DN431	2	16	0	36.587	0.437314	0	0
pSyn_Nrg1CtNrg3_pSyn_Gfp	DN431	3	14	1	34.26	0.40864	0.0291886	0.0714286
pSyn_Nrg1CtNrg3_pSyn_Gfp	DN431	4	12	0	31.045	0.386536	0	0
pSyn_Nrg1CtNrg3_pSyn_Gfp	DN431	5	17	1	48.706	0.349033	0.0205314	0.0588235
pSyn_Nrg1CtNrg3_pSyn_Gfp	DN431	6	32	0	48.577	0.658748	0	0
pSyn_Nrg1CtNrg3_pSyn_Gfp	DN431	7	18	1	51.268	0.351096	0.0195053	0.0555556
pSyn_Nrg1CtNrg3_pSyn_Gfp	DN431	8	21	0	46.427	0.452323	0	0
pSyn_Nrg3CtNrg1_pSyn_Gfp	DN406	1	19	12	49.454	0.384195	0.24265	0.631579
pSyn_Nrg3CtNrg1_pSyn_Gfp	DN406	2	20	12	52.269	0.382636	0.229582	0.6
pSyn_Nrg3CtNrg1_pSyn_Gfp	DN406	3	13	6	39.713	0.327349	0.151084	0.461538
pSyn_Nrg3CtNrg1_pSyn_Gfp	DN406	4	13	5	42.354	0.306937	0.118053	0.384615
pSyn_Nrg3CtNrg1_pSyn_Gfp	DN406	5	10	7	35.105	0.28486	0.199402	0.7
pSyn_Nrg3CtNrg1_pSyn_Gfp	DN406	6	19	5	43.375	0.43804	0.115274	0.263158
pSyn_Nrg3CtNrg1_pSyn_Gfp	DN406	7	18	18	40.838	0.440766	0.440766	1
pSyn_Nrg3CtNrg1_pSyn_Gfp	DN406	8	23	14	50.213	0.458049	0.278812	0.608696
pSyn_Nrg3CtNrg1_pSyn_Gfp	DN406	9	11	5	42.653	0.257895	0.117225	0.454545
pSyn_Nrg3CtNrg1_pSyn_Gfp	DN419	1	10	8	42.426	0.235705	0.188564	0.8
pSyn_Nrg3CtNrg1_pSyn_Gfp	DN419	2	16	9	44.387	0.360466	0.202762	0.5625
pSyn_Nrg3CtNrg1_pSyn_Gfp	DN419	3	8	2	37.798	0.211651	0.0529129	0.25
pSyn_Nrg3CtNrg1_pSyn_Gfp	DN419	4	7	3	32.966	0.21234	0.0910029	0.428571
pSyn_Nrg3CtNrg1_pSyn_Gfp	DN419	5	13	0	34.257	0.379484	0	0
pSyn_Nrg3CtNrg1_pSyn_Gfp	DN419	6	13	10	35.767	0.363464	0.279587	0.769231
pSyn_Nrg3CtNrg1_pSyn_Gfp	DN419	7	19	6	38.568	0.492636	0.155569	0.315789
pSyn_Nrg3CtNrg1_pSyn_Gfp	DN419	8	12	8	43.38	0.276625	0.184417	0.666667
pSyn_Nrg3CtNrg1_pSyn_Gfp	DN439	1	7	4	38.781	0.180501	0.103143	0.571429
pSyn_Nrg3CtNrg1_pSyn_Gfp	DN439	2	16	9	44.947	0.355975	0.200236	0.5625
pSyn_Nrg3CtNrg1_pSyn_Gfp	DN439	3	16	13	41.336	0.387072	0.314496	0.8125
pSyn_Nrg3CtNrg1_pSyn_Gfp	DN439	4	12	7	47.414	0.25309	0.147636	0.583333
pSyn_Nrg3CtNrg1_pSyn_Gfp	DN439	5	11	0	39.03	0.281834	0	0
pSyn_Nrg3CtNrg1_pSyn_Gfp	DN439	6	12	4	47.064	0.254972	0.0849907	0.333333
pSyn_Nrg3CtNrg1_pSyn_Gfp	DN439	7	19	15	46.191	0.411336	0.324739	0.789474
pSyn_Nrg3CtNrg1_pSyn_Gfp	DN439	8	11	4	50.43	0.218124	0.0793179	0.363636
pSyn_Nrg3CtNrg1_pSyn_Gfp	DN439	9	14	14	42.366	0.330454	0.330454	1
pSyn_Nrg3CtNrg1_pSyn_Gfp	DN447	1	25	9	52.985	0.471832	0.169859	0.36
pSyn_Nrg3CtNrg1_pSyn_Gfp	DN447	2	7	7	42.507	0.164679	0.164679	1
pSyn_Nrg3CtNrg1_pSyn_Gfp	DN447	3	12	6	37.526	0.319778	0.159889	0.5
pSyn_Nrg3CtNrg1_pSyn_Gfp	DN447	4	10	1	35.719	0.279963	0.0279963	0.1
pSyn_Nrg3CtNrg1_pSyn_Gfp	DN447	5	20	12	49.523	0.403853	0.242312	0.6
pSyn_Nrg3CtNrg1_pSyn_Gfp	DN447	6	19	13	41.163	0.46158	0.315818	0.684211
pSyn_Nrg3CtNrg1_pSyn_Gfp	DN447	7	27	14	43.5	0.62069	0.321839	0.518519
pSyn_Nrg3CtNrg1_pSyn_Gfp	DN447	8	17	4	41.412	0.410509	0.0965904	0.235294
