# Supplementary material for: Subcellular sorting of neuregulins controls the assembly of excitatory-inhibitory cortical circuits
Source: eLife. 2020 Dec 15;9:e57000. doi: 10.7554/eLife.57000 (PMC7755390; doi:10.7554/eLife.57000)
Supplement: Figure 5—source data 1. [file elife-57000-fig5-data1.xlsx]

## Sheet: Colocalization_soma
Plasmid	Brain	ROI	Count_HA_GFP_cells	Proportion_HA_GFP_cells
pSyn_Nrg1CtNrg3_pSyn_Gfp	DN405	1	4	0.190476
pSyn_Nrg1CtNrg3_pSyn_Gfp	DN405	2	1	0.047619
pSyn_Nrg1CtNrg3_pSyn_Gfp	DN405	3	0	0
pSyn_Nrg1CtNrg3_pSyn_Gfp	DN405	4	3	0.166667
pSyn_Nrg1CtNrg3_pSyn_Gfp	DN405	5	4	0.153846
pSyn_Nrg1CtNrg3_pSyn_Gfp	DN405	6	0	0
pSyn_Nrg1CtNrg3_pSyn_Gfp	DN405	7	2	0.133333
pSyn_Nrg1CtNrg3_pSyn_Gfp	DN405	8	2	0.133333
pSyn_Nrg1CtNrg3_pSyn_Gfp	DN405	9	1	0.047619
pSyn_Nrg1CtNrg3_pSyn_Gfp	DN405	10	0	0
pSyn_Nrg1CtNrg3_pSyn_Gfp	DN413	1	0	0
pSyn_Nrg1CtNrg3_pSyn_Gfp	DN413	2	2	0.1
pSyn_Nrg1CtNrg3_pSyn_Gfp	DN413	3	0	0
pSyn_Nrg1CtNrg3_pSyn_Gfp	DN413	4	2	0.0869565
pSyn_Nrg1CtNrg3_pSyn_Gfp	DN413	5	1	0.0833333
pSyn_Nrg1CtNrg3_pSyn_Gfp	DN413	6	2	0.0769231
pSyn_Nrg1CtNrg3_pSyn_Gfp	DN413	7	0	0
pSyn_Nrg1CtNrg3_pSyn_Gfp	DN413	8	1	0.0588235
pSyn_Nrg1CtNrg3_pSyn_Gfp	DN413	9	0	0
pSyn_Nrg1CtNrg3_pSyn_Gfp	DN427	1	0	0
pSyn_Nrg1CtNrg3_pSyn_Gfp	DN427	2	0	0
pSyn_Nrg1CtNrg3_pSyn_Gfp	DN427	3	1	0.0526316
pSyn_Nrg1CtNrg3_pSyn_Gfp	DN427	4	0	0
pSyn_Nrg1CtNrg3_pSyn_Gfp	DN427	5	0	0
pSyn_Nrg1CtNrg3_pSyn_Gfp	DN427	6	1	0.0588235
pSyn_Nrg1CtNrg3_pSyn_Gfp	DN427	7	1	0.111111
pSyn_Nrg1CtNrg3_pSyn_Gfp	DN427	8	0	0
pSyn_Nrg1CtNrg3_pSyn_Gfp	DN427	9	1	0.0769231
pSyn_Nrg1CtNrg3_pSyn_Gfp	DN430	1	1	0.0625
pSyn_Nrg1CtNrg3_pSyn_Gfp	DN430	2	1	0.0714286
pSyn_Nrg1CtNrg3_pSyn_Gfp	DN430	3	2	0.111111
pSyn_Nrg1CtNrg3_pSyn_Gfp	DN430	4	1	0.0588235
pSyn_Nrg1CtNrg3_pSyn_Gfp	DN430	5	1	0.0714286
pSyn_Nrg1CtNrg3_pSyn_Gfp	DN430	6	1	0.111111
pSyn_Nrg1CtNrg3_pSyn_Gfp	DN431	1	0	0
pSyn_Nrg1CtNrg3_pSyn_Gfp	DN431	2	0	0
pSyn_Nrg1CtNrg3_pSyn_Gfp	DN431	3	0	0
pSyn_Nrg1CtNrg3_pSyn_Gfp	DN431	4	2	0.111111
pSyn_Nrg1CtNrg3_pSyn_Gfp	DN431	5	1	0.166667
pSyn_Nrg1CtNrg3_pSyn_Gfp	DN431	6	1	0.1
pSyn_Nrg3CtNrg1_pSyn_Gfp	DN406	1	9	0.409091
pSyn_Nrg3CtNrg1_pSyn_Gfp	DN406	2	11	0.5
pSyn_Nrg3CtNrg1_pSyn_Gfp	DN406	3	11	0.733333
pSyn_Nrg3CtNrg1_pSyn_Gfp	DN406	4	9	0.6
pSyn_Nrg3CtNrg1_pSyn_Gfp	DN406	5	6	0.315789
pSyn_Nrg3CtNrg1_pSyn_Gfp	DN406	6	8	0.421053
pSyn_Nrg3CtNrg1_pSyn_Gfp	DN406	7	9	0.5625
pSyn_Nrg3CtNrg1_pSyn_Gfp	DN406	8	2	0.133333
pSyn_Nrg3CtNrg1_pSyn_Gfp	DN406	9	8	0.363636
pSyn_Nrg3CtNrg1_pSyn_Gfp	DN419	1	7	0.269231
pSyn_Nrg3CtNrg1_pSyn_Gfp	DN419	2	12	0.48
pSyn_Nrg3CtNrg1_pSyn_Gfp	DN419	3	5	0.25
pSyn_Nrg3CtNrg1_pSyn_Gfp	DN419	4	6	0.24
pSyn_Nrg3CtNrg1_pSyn_Gfp	DN419	5	11	0.407407
pSyn_Nrg3CtNrg1_pSyn_Gfp	DN419	6	6	0.26087
pSyn_Nrg3CtNrg1_pSyn_Gfp	DN419	7	8	0.32
pSyn_Nrg3CtNrg1_pSyn_Gfp	DN437	1	11	0.5
pSyn_Nrg3CtNrg1_pSyn_Gfp	DN437	2	5	0.227273
pSyn_Nrg3CtNrg1_pSyn_Gfp	DN437	3	7	0.368421
pSyn_Nrg3CtNrg1_pSyn_Gfp	DN437	4	12	0.6
pSyn_Nrg3CtNrg1_pSyn_Gfp	DN437	5	16	0.592593
pSyn_Nrg3CtNrg1_pSyn_Gfp	DN437	6	7	0.388889
pSyn_Nrg3CtNrg1_pSyn_Gfp	DN437	7	9	0.409091
pSyn_Nrg3CtNrg1_pSyn_Gfp	DN437	8	6	0.375
pSyn_Nrg3CtNrg1_pSyn_Gfp	DN439	1	14	0.583333
pSyn_Nrg3CtNrg1_pSyn_Gfp	DN439	2	11	0.44
pSyn_Nrg3CtNrg1_pSyn_Gfp	DN439	3	16	0.592593
pSyn_Nrg3CtNrg1_pSyn_Gfp	DN439	4	10	0.588235
pSyn_Nrg3CtNrg1_pSyn_Gfp	DN439	5	10	0.47619
pSyn_Nrg3CtNrg1_pSyn_Gfp	DN439	6	6	0.461538
pSyn_Nrg3CtNrg1_pSyn_Gfp	DN439	7	15	0.652174
pSyn_Nrg3CtNrg1_pSyn_Gfp	DN439	8	9	0.473684
pSyn_Nrg3CtNrg1_pSyn_Gfp	DN439	9	5	0.294118
pSyn_Nrg3CtNrg1_pSyn_Gfp	DN449	1	14	0.56
pSyn_Nrg3CtNrg1_pSyn_Gfp	DN449	2	11	0.392857
pSyn_Nrg3CtNrg1_pSyn_Gfp	DN449	3	12	0.5
pSyn_Nrg3CtNrg1_pSyn_Gfp	DN449	4	13	0.65
pSyn_Nrg3CtNrg1_pSyn_Gfp	DN449	5	19	0.678571
pSyn_Nrg3CtNrg1_pSyn_Gfp	DN449	6	19	0.678571
pSyn_Nrg3CtNrg1_pSyn_Gfp	DN449	7	11	0.578947

## Sheet: Colocalization_neuropil
Plasmid	Brain	ROI	Area_colocalization	Area_GFP	Area_HA	Proportion_colocalization
pSyn_Nrg1CtNrg3_pSyn_Gfp	DN405	1	0.0971085	0.559618	0.129897	0.173526
pSyn_Nrg1CtNrg3_pSyn_Gfp	DN405	2	0.112035	0.443497	0.155139	0.252617
pSyn_Nrg1CtNrg3_pSyn_Gfp	DN405	3	0.0494275	0.487386	0.0817616	0.101413
pSyn_Nrg1CtNrg3_pSyn_Gfp	DN405	4	0.0799624	0.571209	0.102341	0.139988
pSyn_Nrg1CtNrg3_pSyn_Gfp	DN405	5	0.0836005	0.459266	0.111748	0.182031
pSyn_Nrg1CtNrg3_pSyn_Gfp	DN405	6	0.0436684	0.50459	0.0665011	0.0865423
pSyn_Nrg1CtNrg3_pSyn_Gfp	DN405	7	0.0305452	0.433116	0.0665011	0.0705244
pSyn_Nrg1CtNrg3_pSyn_Gfp	DN405	8	0.0904459	0.436854	0.130553	0.207039
pSyn_Nrg1CtNrg3_pSyn_Gfp	DN413	1	0.0396017	0.561229	0.0678368	0.0705625
pSyn_Nrg1CtNrg3_pSyn_Gfp	DN413	2	0.0644298	0.610473	0.094745	0.105541
pSyn_Nrg1CtNrg3_pSyn_Gfp	DN413	3	0.0540104	0.585593	0.0847824	0.0922319
pSyn_Nrg1CtNrg3_pSyn_Gfp	DN413	4	0.0821855	0.530586	0.120658	0.154896
pSyn_Nrg1CtNrg3_pSyn_Gfp	DN413	5	0.0351518	0.516544	0.0636956	0.0680519
pSyn_Nrg1CtNrg3_pSyn_Gfp	DN413	6	0.0611593	0.426724	0.110994	0.143323
pSyn_Nrg1CtNrg3_pSyn_Gfp	DN413	7	0.0716465	0.572407	0.104914	0.125167
pSyn_Nrg1CtNrg3_pSyn_Gfp	DN413	8	0.0783933	0.586094	0.115305	0.133755
pSyn_Nrg1CtNrg3_pSyn_Gfp	DN427	1	0.0403334	0.467587	0.0759752	0.0862586
pSyn_Nrg1CtNrg3_pSyn_Gfp	DN427	2	0.0803976	0.536915	0.117586	0.14974
pSyn_Nrg1CtNrg3_pSyn_Gfp	DN427	3	0.0824163	0.513904	0.119266	0.160373
pSyn_Nrg1CtNrg3_pSyn_Gfp	DN427	4	0.0511446	0.521707	0.0857865	0.0980333
pSyn_Nrg1CtNrg3_pSyn_Gfp	DN427	5	0.0667746	0.662508	0.0829747	0.100791
pSyn_Nrg1CtNrg3_pSyn_Gfp	DN427	6	0.0642754	0.44391	0.10531	0.144794
pSyn_Nrg1CtNrg3_pSyn_Gfp	DN427	7	0.0357209	0.661929	0.0513835	0.053965
pSyn_Nrg1CtNrg3_pSyn_Gfp	DN427	8	0.0650988	0.446177	0.101254	0.145903
pSyn_Nrg1CtNrg3_pSyn_Gfp	DN430	1	0.105518	0.574804	0.144676	0.183573
pSyn_Nrg1CtNrg3_pSyn_Gfp	DN430	2	0.102431	0.569972	0.145334	0.179713
pSyn_Nrg1CtNrg3_pSyn_Gfp	DN430	3	0.0774988	0.484997	0.116871	0.159792
pSyn_Nrg1CtNrg3_pSyn_Gfp	DN430	4	0.0817264	0.513652	0.114684	0.159108
pSyn_Nrg1CtNrg3_pSyn_Gfp	DN430	5	0.0904657	0.528177	0.122185	0.171279
pSyn_Nrg1CtNrg3_pSyn_Gfp	DN430	6	0.0935848	0.546138	0.128952	0.171357
pSyn_Nrg1CtNrg3_pSyn_Gfp	DN430	7	0.0291781	0.495353	0.0510676	0.0589037
pSyn_Nrg1CtNrg3_pSyn_Gfp	DN430	8	0.0224012	0.438461	0.0423388	0.0510905
pSyn_Nrg1CtNrg3_pSyn_Gfp	DN431	1	0.120173	0.506005	0.139366	0.237494
pSyn_Nrg1CtNrg3_pSyn_Gfp	DN431	2	0.135313	0.495718	0.17162	0.272964
pSyn_Nrg1CtNrg3_pSyn_Gfp	DN431	3	0.0675751	0.447817	0.0904076	0.150899
pSyn_Nrg1CtNrg3_pSyn_Gfp	DN431	4	0.0319583	0.499795	0.0497146	0.0639429
pSyn_Nrg1CtNrg3_pSyn_Gfp	DN431	5	0.0453712	0.426939	0.0752953	0.106271
pSyn_Nrg1CtNrg3_pSyn_Gfp	DN431	6	0.0398892	0.612256	0.0528544	0.0651512
pSyn_Nrg1CtNrg3_pSyn_Gfp	DN431	7	0.0634454	0.610237	0.0914526	0.103968
pSyn_Nrg1CtNrg3_pSyn_Gfp	DN431	8	0.0519787	0.417621	0.0936202	0.124464
pSyn_Nrg3CtNrg1_pSyn_Gfp	DN406	1	0.06271	0.451248	0.0911053	0.13897
pSyn_Nrg3CtNrg1_pSyn_Gfp	DN406	2	0.0330427	0.59236	0.0461904	0.0557814
pSyn_Nrg3CtNrg1_pSyn_Gfp	DN406	3	0.0520562	0.534539	0.0723799	0.0973852
pSyn_Nrg3CtNrg1_pSyn_Gfp	DN406	4	0.0726407	0.575664	0.0996023	0.126186
pSyn_Nrg3CtNrg1_pSyn_Gfp	DN406	5	0.0693828	0.538768	0.0945346	0.12878
pSyn_Nrg3CtNrg1_pSyn_Gfp	DN406	6	0.0570693	0.481766	0.079662	0.118458
pSyn_Nrg3CtNrg1_pSyn_Gfp	DN406	7	0.0523223	0.47302	0.0735822	0.110613
pSyn_Nrg3CtNrg1_pSyn_Gfp	DN406	8	0.0163857	0.415655	0.0290067	0.0394213
pSyn_Nrg3CtNrg1_pSyn_Gfp	DN419	1	0.0492569	0.599141	0.0716789	0.0822126
pSyn_Nrg3CtNrg1_pSyn_Gfp	DN419	2	0.0390235	0.654984	0.0554171	0.0595794
pSyn_Nrg3CtNrg1_pSyn_Gfp	DN419	3	0.0219102	0.653271	0.0339612	0.0335392
pSyn_Nrg3CtNrg1_pSyn_Gfp	DN419	4	0.0554687	0.32805	0.11822	0.169086
pSyn_Nrg3CtNrg1_pSyn_Gfp	DN419	5	0.0324763	0.357469	0.0614012	0.0908508
pSyn_Nrg3CtNrg1_pSyn_Gfp	DN419	6	0.0426456	0.576332	0.0667475	0.0739948
pSyn_Nrg3CtNrg1_pSyn_Gfp	DN419	7	0.0448716	0.572114	0.070492	0.0784312
pSyn_Nrg3CtNrg1_pSyn_Gfp	DN437	1	0.0335815	0.52755	0.0448263	0.0636555
pSyn_Nrg3CtNrg1_pSyn_Gfp	DN437	2	0.0882361	0.600582	0.107077	0.146918
pSyn_Nrg3CtNrg1_pSyn_Gfp	DN437	3	0.0875942	0.606058	0.102597	0.144531
pSyn_Nrg3CtNrg1_pSyn_Gfp	DN437	4	0.0245428	0.373879	0.0357914	0.0656436
pSyn_Nrg3CtNrg1_pSyn_Gfp	DN437	5	0.0422837	0.467281	0.0563598	0.0904886
pSyn_Nrg3CtNrg1_pSyn_Gfp	DN437	6	0.0649511	0.440726	0.092118	0.147373
pSyn_Nrg3CtNrg1_pSyn_Gfp	DN437	7	0.0260552	0.359694	0.038867	0.0724371
pSyn_Nrg3CtNrg1_pSyn_Gfp	DN437	8	0.0430921	0.441134	0.0574495	0.0976848
pSyn_Nrg3CtNrg1_pSyn_Gfp	DN439	1	0.0196675	0.386873	0.0331415	0.050837
pSyn_Nrg3CtNrg1_pSyn_Gfp	DN439	2	0.0946672	0.496314	0.124332	0.19074
pSyn_Nrg3CtNrg1_pSyn_Gfp	DN439	3	0.101463	0.527702	0.130548	0.192274
pSyn_Nrg3CtNrg1_pSyn_Gfp	DN439	4	0.0204643	0.693672	0.0315925	0.0295014
pSyn_Nrg3CtNrg1_pSyn_Gfp	DN439	5	0.0425123	0.341844	0.0692725	0.124362
pSyn_Nrg3CtNrg1_pSyn_Gfp	DN439	6	0.076417	0.429468	0.11272	0.177934
pSyn_Nrg3CtNrg1_pSyn_Gfp	DN439	7	0.0700436	0.481265	0.0968801	0.145541
pSyn_Nrg3CtNrg1_pSyn_Gfp	DN439	8	0.0516467	0.708756	0.0675646	0.0728695
pSyn_Nrg3CtNrg1_pSyn_Gfp	DN449	1	0.0741588	0.42675	0.103297	0.173776
pSyn_Nrg3CtNrg1_pSyn_Gfp	DN449	2	0.0936868	0.487343	0.121241	0.19224
pSyn_Nrg3CtNrg1_pSyn_Gfp	DN449	3	0.0454034	0.572517	0.0594819	0.0793048
pSyn_Nrg3CtNrg1_pSyn_Gfp	DN449	4	0.0480224	0.503806	0.0720191	0.0953192
pSyn_Nrg3CtNrg1_pSyn_Gfp	DN449	5	0.0381973	0.542781	0.054711	0.0703733
pSyn_Nrg3CtNrg1_pSyn_Gfp	DN449	6	0.0647796	0.596112	0.0845513	0.10867
pSyn_Nrg3CtNrg1_pSyn_Gfp	DN449	7	0.0586157	0.421812	0.0830035	0.138962
pSyn_Nrg3CtNrg1_pSyn_Gfp	DN449	8	0.0239977	0.5301	0.0362734	0.04527
pSyn_Nrg3CtNrg1_pSyn_Gfp	DN449	9	0.0528308	0.581143	0.0698117	0.0909085
