# Supplementary material for: Subcellular sorting of neuregulins controls the assembly of excitatory-inhibitory cortical circuits
Source: eLife. 2020 Dec 15;9:e57000. doi: 10.7554/eLife.57000 (PMC7755390; doi:10.7554/eLife.57000)
Supplement: Figure 5—source data 2. [file elife-57000-fig5-data2.xlsx]

## Sheet: Inhibitory_synapses
Plasmid	Brain	Cell	Count_gad65_cb1r	Perimeter_cell	Density_gad65_cb1r
pSyn_Gfp	DN274	1	4	43.201	0.0925904
pSyn_Gfp	DN274	2	2	38.009	0.0526191
pSyn_Gfp	DN274	3	3	42.037	0.0713657
pSyn_Gfp	DN274	4	2	52.598	0.0380243
pSyn_Gfp	DN274	5	8	37.856	0.211327
pSyn_Gfp	DN274	6	5	45.816	0.109132
pSyn_Gfp	DN274	7	8	49.4	0.161943
pSyn_Gfp	DN274	8	5	44.9	0.111359
pSyn_Gfp	DN274	9	2	45.144	0.0443027
pSyn_Gfp	DN274	10	3	41.319	0.0726058
pSyn_Gfp	DN274	11	7	45.97	0.152273
pSyn_Gfp	DN274	12	5	43.007	0.11626
pSyn_Gfp	DN274	13	5	45.886	0.108966
pSyn_Gfp	DN277	1	6	49.335	0.121618
pSyn_Gfp	DN277	2	4	32.817	0.121888
pSyn_Gfp	DN277	3	6	31.548	0.190186
pSyn_Gfp	DN277	4	2	44.55	0.0448934
pSyn_Gfp	DN277	5	7	37.111	0.188623
pSyn_Gfp	DN277	6	1	53.249	0.0187797
pSyn_Gfp	DN277	7	3	49.134	0.0610575
pSyn_Gfp	DN277	8	4	39.579	0.101064
pSyn_Gfp	DN277	9	4	46.765	0.0855341
pSyn_Gfp	DN277	10	2	34.301	0.0583073
pSyn_Gfp	DN277	11	4	40.041	0.0998976
pSyn_Gfp	DN277	12	11	43.458	0.253118
pSyn_Gfp	DN277	13	1	49.455	0.0202204
pSyn_Gfp	DN277	14	10	52.347	0.191033
pSyn_Gfp	DN277	15	4	36.86	0.108519
pSyn_Gfp	DN277	16	6	46.813	0.12817
pSyn_Gfp	DN277	17	4	41.129	0.097255
pSyn_Gfp	DN277	18	8	45.388	0.176258
pSyn_Gfp	DN278	1	3	34.18	0.0877706
pSyn_Gfp	DN278	2	1	47.573	0.0210203
pSyn_Gfp	DN278	3	3	34.123	0.0879172
pSyn_Gfp	DN278	4	3	35.389	0.0847721
pSyn_Gfp	DN278	5	3	37.581	0.0798276
pSyn_Gfp	DN278	6	8	50.134	0.159572
pSyn_Gfp	DN278	7	14	51.973	0.269371
pSyn_Gfp	DN278	8	11	48.391	0.227315
pSyn_Gfp	DN278	9	5	53.392	0.093647
pSyn_Gfp	DN278	10	5	37.296	0.134063
pSyn_Gfp	DN278	11	5	38.374	0.130297
pSyn_Gfp	DN278	12	3	45.94	0.0653026
pSyn_Gfp	DN278	13	2	29.503	0.0677897
pSyn_Gfp	DN278	14	7	47.925	0.146062
pSyn_Gfp	DN278	15	4	40.012	0.09997
pSyn_Gfp	DN278	16	2	44.079	0.0453731
pSyn_Gfp	DN278	17	4	46.704	0.0856458
pSyn_Gfp	DN278	18	2	34.667	0.0576918
pSyn_Gfp	DN278	19	4	36.426	0.109812
pSyn_Gfp	DN278	20	1	40.168	0.0248954
pSyn_Gfp	DN278	21	7	45.065	0.155331
pSyn_Gfp	DN280	1	9	42.36	0.212465
pSyn_Gfp	DN280	2	1	40.149	0.0249072
pSyn_Gfp	DN280	3	5	44.799	0.11161
pSyn_Gfp	DN280	4	3	40.091	0.0748298
pSyn_Gfp	DN280	5	2	41.443	0.0482591
pSyn_Gfp	DN280	6	6	39.383	0.15235
pSyn_Gfp	DN280	7	2	40.584	0.0492805
pSyn_Gfp	DN280	8	4	46.79	0.0854884
pSyn_Gfp	DN280	9	5	44.631	0.11203
pSyn_Gfp	DN280	10	3	52.036	0.0576524
pSyn_Gfp	DN280	11	4	43.923	0.0910685
pSyn_Gfp	DN280	12	3	32.626	0.0919512
pSyn_Gfp	DN280	13	4	48.915	0.0817745
pSyn_Gfp	DN280	14	1	42.934	0.0232916
pSyn_Gfp	DN280	15	3	42.21	0.0710732
pSyn_Gfp	DN280	16	5	36.101	0.1385
pSyn_Gfp	DN280	17	5	43.453	0.115067
pSyn_Gfp	DN280	18	3	54.061	0.0554929
pSyn_Gfp	DN280	19	3	44.897	0.0668196
pSyn_Gfp	DN273	1	6	33.73	0.177883
pSyn_Gfp	DN273	2	4	38.578	0.103686
pSyn_Gfp	DN273	3	9	41.138	0.218776
pSyn_Gfp	DN273	4	4	35.497	0.112686
pSyn_Gfp	DN273	5	5	37.476	0.133419
pSyn_Gfp	DN273	6	2	41.229	0.0485095
pSyn_Gfp	DN273	7	4	42.021	0.0951905
pSyn_Gfp	DN273	8	8	46.684	0.171365
pSyn_Gfp	DN273	9	6	35.723	0.167959
pSyn_Gfp	DN273	10	4	55.538	0.0720228
pSyn_Gfp	DN273	11	4	49.137	0.0814051
pSyn_Gfp	DN273	12	2	46.082	0.0434009
pSyn_Gfp	DN273	13	2	35.49	0.0563539
pSyn_Gfp	DN273	14	4	43.164	0.0926698
pSyn_Gfp	DN273	15	5	43.327	0.115401
pSyn_Gfp	DN273	16	3	38.643	0.0776337
pSyn_Gfp	DN273	17	3	40.217	0.0745953
pSyn_Gfp	DN273	18	5	37.158	0.134561
pSyn_Gfp	DN273	19	6	38.015	0.157832
pSyn_Gfp	DN282	1	7	40.555	0.172605
pSyn_Gfp	DN282	2	5	40.183	0.124431
pSyn_Gfp	DN282	3	8	39.791	0.20105
pSyn_Gfp	DN282	4	2	49.687	0.040252
pSyn_Gfp	DN282	5	2	39.843	0.050197
pSyn_Gfp	DN282	6	4	35.642	0.112227
pSyn_Gfp	DN282	7	8	37.05	0.215924
pSyn_Gfp	DN282	8	2	39.916	0.0501052
pSyn_Gfp	DN282	9	2	35.387	0.0565179
pSyn_Gfp	DN282	10	4	45.27	0.0883587
pSyn_Gfp	DN282	11	4	40.655	0.0983889
pSyn_Gfp	DN282	12	5	39.416	0.126852
pSyn_Gfp	DN282	13	2	46.151	0.043336
pSyn_Gfp	DN282	14	3	45.012	0.0666489
pSyn_Gfp	DN282	15	4	38.446	0.104042
pSyn_Gfp	DN282	16	5	54.208	0.0922373
pSyn_Gfp	DN282	17	5	45.932	0.108857
pSyn_Gfp	DN282	18	2	46.608	0.0429111
pSyn_Gfp	DN282	19	7	40.98	0.170815
pSyn_Gfp	DN282	20	2	36.844	0.0542829
pSyn_Gfp	DN282	21	7	48.783	0.143493
pSyn_Gfp	DN282	22	12	50.592	0.237192
pSyn_Gfp	DN282	23	8	37.445	0.213647
pSyn_Gfp	DN282	24	2	41.501	0.0481916
pSyn_Gfp	DN282	25	5	43.368	0.115292
pSyn_Gfp	DN282	26	1	43.401	0.0230409
pSyn_Gfp	DN282	27	4	41.369	0.0966908
pSyn_Gfp	DN282	28	2	61.603	0.032466
pSyn_Gfp	DN282	29	13	46.64	0.278731
pSyn_Gfp	DN282	30	2	46.233	0.0432591
pSyn_Nrg1CtNrg3_pSyn_Gfp	DN427	1	5	46.623	0.107243
pSyn_Nrg1CtNrg3_pSyn_Gfp	DN427	2	3	38.955	0.0770119
pSyn_Nrg1CtNrg3_pSyn_Gfp	DN427	3	6	48.244	0.124368
pSyn_Nrg1CtNrg3_pSyn_Gfp	DN427	4	7	37.692	0.185716
pSyn_Nrg1CtNrg3_pSyn_Gfp	DN427	5	3	50.072	0.0599137
pSyn_Nrg1CtNrg3_pSyn_Gfp	DN427	6	6	41.461	0.144714
pSyn_Nrg1CtNrg3_pSyn_Gfp	DN427	7	8	43.548	0.183705
pSyn_Nrg1CtNrg3_pSyn_Gfp	DN427	8	4	43.657	0.0916233
pSyn_Nrg1CtNrg3_pSyn_Gfp	DN427	9	4	38.289	0.104469
pSyn_Nrg1CtNrg3_pSyn_Gfp	DN427	10	2	39.059	0.0512046
pSyn_Nrg1CtNrg3_pSyn_Gfp	DN427	11	2	42.623	0.046923
pSyn_Nrg1CtNrg3_pSyn_Gfp	DN427	12	2	40.091	0.0498865
pSyn_Nrg1CtNrg3_pSyn_Gfp	DN427	13	3	45.847	0.065435
pSyn_Nrg1CtNrg3_pSyn_Gfp	DN431	1	9	50.935	0.176696
pSyn_Nrg1CtNrg3_pSyn_Gfp	DN431	2	6	45.76	0.131119
pSyn_Nrg1CtNrg3_pSyn_Gfp	DN431	3	7	38.517	0.181738
pSyn_Nrg1CtNrg3_pSyn_Gfp	DN431	4	5	46.048	0.108582
pSyn_Nrg1CtNrg3_pSyn_Gfp	DN431	5	4	40.38	0.0990589
pSyn_Nrg1CtNrg3_pSyn_Gfp	DN431	6	14	54.951	0.254772
pSyn_Nrg1CtNrg3_pSyn_Gfp	DN431	7	5	34.032	0.146921
pSyn_Nrg1CtNrg3_pSyn_Gfp	DN431	8	9	47.239	0.190521
pSyn_Nrg1CtNrg3_pSyn_Gfp	DN431	9	4	53.273	0.0750849
pSyn_Nrg1CtNrg3_pSyn_Gfp	DN431	10	5	49.348	0.101321
pSyn_Nrg1CtNrg3_pSyn_Gfp	DN431	11	12	45.241	0.265246
pSyn_Nrg1CtNrg3_pSyn_Gfp	DN431	12	11	53.281	0.206453
pSyn_Nrg1CtNrg3_pSyn_Gfp	DN431	13	3	40.848	0.073443
pSyn_Nrg1CtNrg3_pSyn_Gfp	DN431	14	1	49.973	0.0200108
pSyn_Nrg1CtNrg3_pSyn_Gfp	DN431	15	4	59.483	0.0672461
pSyn_Nrg1CtNrg3_pSyn_Gfp	DN431	16	4	43.818	0.0912867
pSyn_Nrg1CtNrg3_pSyn_Gfp	DN431	17	3	55.319	0.0542309
pSyn_Nrg1CtNrg3_pSyn_Gfp	DN431	18	8	48.158	0.16612
pSyn_Nrg1CtNrg3_pSyn_Gfp	DN431	19	5	52.292	0.0956169
pSyn_Nrg1CtNrg3_pSyn_Gfp	DN431	20	6	51.079	0.117465
pSyn_Nrg1CtNrg3_pSyn_Gfp	DN431	21	4	41.765	0.095774
pSyn_Nrg1CtNrg3_pSyn_Gfp	DN431	22	4	38.764	0.103189
pSyn_Nrg1CtNrg3_pSyn_Gfp	DN431	23	3	40.494	0.074085
pSyn_Nrg1CtNrg3_pSyn_Gfp	DN431	24	4	48.56	0.0823723
pSyn_Nrg1CtNrg3_pSyn_Gfp	DN431	25	6	48.288	0.124254
pSyn_Nrg1CtNrg3_pSyn_Gfp	DN431	26	5	47.342	0.105614
pSyn_Nrg1CtNrg3_pSyn_Gfp	DN431	27	5	57.558	0.0868689
pSyn_Nrg1CtNrg3_pSyn_Gfp	DN431	28	1	40.851	0.0244792
pSyn_Nrg1CtNrg3_pSyn_Gfp	DN417	1	8	38.82	0.206079
pSyn_Nrg1CtNrg3_pSyn_Gfp	DN417	2	2	35.624	0.0561419
pSyn_Nrg1CtNrg3_pSyn_Gfp	DN417	3	2	41.863	0.0477749
pSyn_Nrg1CtNrg3_pSyn_Gfp	DN417	4	2	42.622	0.0469241
pSyn_Nrg1CtNrg3_pSyn_Gfp	DN417	5	8	37.964	0.210726
pSyn_Nrg1CtNrg3_pSyn_Gfp	DN417	6	3	39.977	0.0750432
pSyn_Nrg1CtNrg3_pSyn_Gfp	DN417	7	5	37.652	0.132795
pSyn_Nrg1CtNrg3_pSyn_Gfp	DN417	8	7	55.085	0.127076
pSyn_Nrg1CtNrg3_pSyn_Gfp	DN417	9	6	37.496	0.160017
pSyn_Nrg1CtNrg3_pSyn_Gfp	DN417	10	4	43.686	0.0915625
pSyn_Nrg1CtNrg3_pSyn_Gfp	DN417	11	9	41.19	0.2185
pSyn_Nrg1CtNrg3_pSyn_Gfp	DN417	12	6	48.057	0.124852
pSyn_Nrg1CtNrg3_pSyn_Gfp	DN417	13	8	51.121	0.156491
pSyn_Nrg1CtNrg3_pSyn_Gfp	DN417	14	5	40.324	0.123996
pSyn_Nrg1CtNrg3_pSyn_Gfp	DN417	15	1	45.484	0.0219858
pSyn_Nrg1CtNrg3_pSyn_Gfp	DN417	16	2	39.535	0.0505881
pSyn_Nrg1CtNrg3_pSyn_Gfp	DN417	17	3	40.791	0.0735456
pSyn_Nrg1CtNrg3_pSyn_Gfp	DN417	18	1	52.542	0.0190324
pSyn_Nrg1CtNrg3_pSyn_Gfp	DN417	19	4	41.706	0.0959095
pSyn_Nrg1CtNrg3_pSyn_Gfp	DN430	1	3	51.077	0.0587349
pSyn_Nrg1CtNrg3_pSyn_Gfp	DN430	2	11	42.073	0.26145
pSyn_Nrg1CtNrg3_pSyn_Gfp	DN430	3	3	47.004	0.0638244
pSyn_Nrg1CtNrg3_pSyn_Gfp	DN430	4	9	44.896	0.200463
pSyn_Nrg1CtNrg3_pSyn_Gfp	DN430	5	8	49.856	0.160462
pSyn_Nrg1CtNrg3_pSyn_Gfp	DN430	6	7	47.345	0.147851
pSyn_Nrg1CtNrg3_pSyn_Gfp	DN430	7	8	46.35	0.1726
pSyn_Nrg1CtNrg3_pSyn_Gfp	DN430	8	2	41.646	0.0480238
pSyn_Nrg1CtNrg3_pSyn_Gfp	DN430	9	6	34.728	0.172771
pSyn_Nrg1CtNrg3_pSyn_Gfp	DN430	10	7	39.612	0.176714
pSyn_Nrg1CtNrg3_pSyn_Gfp	DN430	11	4	45.774	0.0873859
pSyn_Nrg1CtNrg3_pSyn_Gfp	DN430	12	12	62.01	0.193517
pSyn_Nrg1CtNrg3_pSyn_Gfp	DN430	13	3	48.749	0.0615397
pSyn_Nrg1CtNrg3_pSyn_Gfp	DN430	14	6	46.825	0.128137
pSyn_Nrg1CtNrg3_pSyn_Gfp	DN430	15	5	48.226	0.103679
pSyn_Nrg1CtNrg3_pSyn_Gfp	DN430	16	4	50.918	0.0785577
pSyn_Nrg1CtNrg3_pSyn_Gfp	DN430	17	11	54.401	0.202202
pSyn_Nrg1CtNrg3_pSyn_Gfp	DN430	18	6	51.474	0.116564
pSyn_Nrg1CtNrg3_pSyn_Gfp	DN430	19	7	44.407	0.157633
pSyn_Nrg1CtNrg3_pSyn_Gfp	DN430	20	4	41.924	0.0954107
pSyn_Nrg1CtNrg3_pSyn_Gfp	DN430	21	2	51.524	0.0388169
pSyn_Nrg1CtNrg3_pSyn_Gfp	DN430	22	8	44.344	0.180408
pSyn_Nrg1CtNrg3_pSyn_Gfp	DN430	23	2	53.661	0.037271
pSyn_Nrg1CtNrg3_pSyn_Gfp	DN430	24	5	50.193	0.0996155
pSyn_Nrg1CtNrg3_pSyn_Gfp	DN430	25	7	48.993	0.142878
pSyn_Nrg1CtNrg3_pSyn_Gfp	DN430	26	5	47.589	0.105066
pSyn_Nrg1CtNrg3_pSyn_Gfp	DN430	27	5	41.834	0.11952
pSyn_Nrg1CtNrg3_pSyn_Gfp	DN430	28	4	47.055	0.0850069
pSyn_Nrg1CtNrg3_pSyn_Gfp	DN416	1	4	38.538	0.103794
pSyn_Nrg1CtNrg3_pSyn_Gfp	DN416	2	5	32.144	0.15555
pSyn_Nrg1CtNrg3_pSyn_Gfp	DN416	3	10	49.953	0.200188
pSyn_Nrg1CtNrg3_pSyn_Gfp	DN416	4	3	32.248	0.093029
pSyn_Nrg1CtNrg3_pSyn_Gfp	DN416	5	5	40.497	0.123466
pSyn_Nrg1CtNrg3_pSyn_Gfp	DN416	6	9	41.991	0.214332
pSyn_Nrg1CtNrg3_pSyn_Gfp	DN416	7	5	36.011	0.138846
pSyn_Nrg1CtNrg3_pSyn_Gfp	DN416	8	5	34.512	0.144877
pSyn_Nrg1CtNrg3_pSyn_Gfp	DN416	9	7	37.229	0.188025
pSyn_Nrg1CtNrg3_pSyn_Gfp	DN416	10	10	47.538	0.210358
pSyn_Nrg1CtNrg3_pSyn_Gfp	DN416	11	4	31.929	0.125278
pSyn_Nrg1CtNrg3_pSyn_Gfp	DN416	12	2	42.958	0.0465571
pSyn_Nrg1CtNrg3_pSyn_Gfp	DN416	13	6	38.37	0.156372
pSyn_Nrg1CtNrg3_pSyn_Gfp	DN416	14	6	40.842	0.146908
pSyn_Nrg1CtNrg3_pSyn_Gfp	DN416	15	4	36.501	0.109586
pSyn_Nrg1CtNrg3_pSyn_Gfp	DN416	16	1	38.971	0.0256601
pSyn_Nrg1CtNrg3_pSyn_Gfp	DN416	17	5	43.822	0.114098
pSyn_Nrg1CtNrg3_pSyn_Gfp	DN416	18	5	45.655	0.109517
pSyn_Nrg1CtNrg3_pSyn_Gfp	DN416	19	5	52.259	0.0956773
pSyn_Nrg1CtNrg3_pSyn_Gfp	DN416	20	2	43.843	0.0456173
pSyn_Nrg1CtNrg3_pSyn_Gfp	DN416	21	1	40.638	0.0246075
pSyn_Nrg1CtNrg3_pSyn_Gfp	DN416	22	3	45.013	0.0666474
pSyn_Nrg1CtNrg3_pSyn_Gfp	DN416	23	2	38.504	0.0519427
pSyn_Nrg1CtNrg3_pSyn_Gfp	DN416	24	5	46.426	0.107698
pSyn_Nrg1CtNrg3_pSyn_Gfp	DN416	25	3	42.281	0.0709539
pSyn_Nrg1CtNrg3_pSyn_Gfp	DN416	26	1	42.012	0.0238027
pSyn_Nrg1CtNrg3_pSyn_Gfp	DN413	1	2	42.474	0.0470876
pSyn_Nrg1CtNrg3_pSyn_Gfp	DN413	2	6	51.069	0.117488
pSyn_Nrg1CtNrg3_pSyn_Gfp	DN413	3	5	35.407	0.141215
pSyn_Nrg1CtNrg3_pSyn_Gfp	DN413	4	4	53.494	0.0747747
pSyn_Nrg1CtNrg3_pSyn_Gfp	DN413	5	8	47.701	0.167711
pSyn_Nrg1CtNrg3_pSyn_Gfp	DN413	6	5	51.286	0.0974925
pSyn_Nrg1CtNrg3_pSyn_Gfp	DN413	7	5	47.189	0.105957
pSyn_Nrg1CtNrg3_pSyn_Gfp	DN413	8	10	44.424	0.225104
pSyn_Nrg1CtNrg3_pSyn_Gfp	DN413	9	7	50.756	0.137915
pSyn_Nrg1CtNrg3_pSyn_Gfp	DN413	10	6	48.475	0.123775
pSyn_Nrg1CtNrg3_pSyn_Gfp	DN413	11	2	42.967	0.0465474
pSyn_Nrg1CtNrg3_pSyn_Gfp	DN413	12	7	40.3	0.173697
pSyn_Nrg1CtNrg3_pSyn_Gfp	DN413	13	5	45.19	0.110644
pSyn_Nrg1CtNrg3_pSyn_Gfp	DN413	14	7	39.809	0.17584
pSyn_Nrg1CtNrg3_pSyn_Gfp	DN413	15	5	38.757	0.129009
pSyn_Nrg1CtNrg3_pSyn_Gfp	DN413	16	4	51.768	0.0772678
pSyn_Nrg1CtNrg3_pSyn_Gfp	DN413	17	4	45.103	0.0886859
pSyn_Nrg1CtNrg3_pSyn_Gfp	DN413	18	1	35.934	0.0278288
pSyn_Nrg1CtNrg3_pSyn_Gfp	DN413	19	4	38.437	0.104066
pSyn_Nrg1CtNrg3_pSyn_Gfp	DN413	20	4	39.322	0.101724
pSyn_Nrg1CtNrg3_pSyn_Gfp	DN413	21	3	52.169	0.0575054
pSyn_Nrg1CtNrg3_pSyn_Gfp	DN413	22	3	40.952	0.0732565
pSyn_Nrg3CtNrg1_pSyn_Gfp	DN437	1	4	39.533	0.101181
pSyn_Nrg3CtNrg1_pSyn_Gfp	DN437	2	7	43.546	0.16075
pSyn_Nrg3CtNrg1_pSyn_Gfp	DN437	3	7	38.449	0.182059
pSyn_Nrg3CtNrg1_pSyn_Gfp	DN437	4	11	44.198	0.24888
pSyn_Nrg3CtNrg1_pSyn_Gfp	DN437	5	6	50.424	0.118991
pSyn_Nrg3CtNrg1_pSyn_Gfp	DN437	6	5	49.479	0.101053
pSyn_Nrg3CtNrg1_pSyn_Gfp	DN437	7	5	28.83	0.17343
pSyn_Nrg3CtNrg1_pSyn_Gfp	DN437	8	6	49.205	0.121939
pSyn_Nrg3CtNrg1_pSyn_Gfp	DN437	9	5	40.624	0.12308
pSyn_Nrg3CtNrg1_pSyn_Gfp	DN437	10	6	42.569	0.140948
pSyn_Nrg3CtNrg1_pSyn_Gfp	DN437	11	7	45.665	0.15329
pSyn_Nrg3CtNrg1_pSyn_Gfp	DN437	12	2	46.34	0.0431593
pSyn_Nrg3CtNrg1_pSyn_Gfp	DN437	13	9	44.241	0.203431
pSyn_Nrg3CtNrg1_pSyn_Gfp	DN437	14	10	45.127	0.221597
pSyn_Nrg3CtNrg1_pSyn_Gfp	DN437	15	8	40.178	0.199114
pSyn_Nrg3CtNrg1_pSyn_Gfp	DN437	16	3	50.019	0.0599772
pSyn_Nrg3CtNrg1_pSyn_Gfp	DN437	17	4	46.832	0.0854117
pSyn_Nrg3CtNrg1_pSyn_Gfp	DN437	18	11	53.132	0.207032
pSyn_Nrg3CtNrg1_pSyn_Gfp	DN437	19	3	45.571	0.0658313
pSyn_Nrg3CtNrg1_pSyn_Gfp	DN437	20	5	42.768	0.11691
pSyn_Nrg3CtNrg1_pSyn_Gfp	DN436	1	6	41.437	0.144798
pSyn_Nrg3CtNrg1_pSyn_Gfp	DN436	2	13	45.356	0.286621
pSyn_Nrg3CtNrg1_pSyn_Gfp	DN436	3	8	39.658	0.201725
pSyn_Nrg3CtNrg1_pSyn_Gfp	DN436	4	4	46.673	0.0857027
pSyn_Nrg3CtNrg1_pSyn_Gfp	DN436	5	2	44.954	0.0444899
pSyn_Nrg3CtNrg1_pSyn_Gfp	DN436	6	8	44.48	0.179856
pSyn_Nrg3CtNrg1_pSyn_Gfp	DN436	7	6	49.569	0.121043
pSyn_Nrg3CtNrg1_pSyn_Gfp	DN436	8	14	46.243	0.302749
pSyn_Nrg3CtNrg1_pSyn_Gfp	DN436	9	7	52.326	0.133777
pSyn_Nrg3CtNrg1_pSyn_Gfp	DN436	10	6	45.884	0.130765
pSyn_Nrg3CtNrg1_pSyn_Gfp	DN436	11	9	54.018	0.166611
pSyn_Nrg3CtNrg1_pSyn_Gfp	DN436	12	11	44.542	0.246958
pSyn_Nrg3CtNrg1_pSyn_Gfp	DN436	13	4	52.346	0.0764146
pSyn_Nrg3CtNrg1_pSyn_Gfp	DN436	14	3	54.278	0.055271
pSyn_Nrg3CtNrg1_pSyn_Gfp	DN436	15	6	43.981	0.136423
pSyn_Nrg3CtNrg1_pSyn_Gfp	DN419	1	5	41.652	0.120042
pSyn_Nrg3CtNrg1_pSyn_Gfp	DN419	2	7	45.347	0.154365
pSyn_Nrg3CtNrg1_pSyn_Gfp	DN419	3	8	56.878	0.140652
pSyn_Nrg3CtNrg1_pSyn_Gfp	DN419	4	5	30.159	0.165788
pSyn_Nrg3CtNrg1_pSyn_Gfp	DN419	5	6	35.961	0.166847
pSyn_Nrg3CtNrg1_pSyn_Gfp	DN419	6	12	45.498	0.263748
pSyn_Nrg3CtNrg1_pSyn_Gfp	DN419	7	10	47.346	0.211211
pSyn_Nrg3CtNrg1_pSyn_Gfp	DN419	8	11	53.661	0.204991
pSyn_Nrg3CtNrg1_pSyn_Gfp	DN419	9	4	37.493	0.106687
pSyn_Nrg3CtNrg1_pSyn_Gfp	DN419	10	9	47.886	0.187946
pSyn_Nrg3CtNrg1_pSyn_Gfp	DN419	11	7	47.559	0.147186
pSyn_Nrg3CtNrg1_pSyn_Gfp	DN419	12	7	45.907	0.152482
pSyn_Nrg3CtNrg1_pSyn_Gfp	DN419	13	7	43.128	0.162308
pSyn_Nrg3CtNrg1_pSyn_Gfp	DN419	14	8	46.922	0.170496
pSyn_Nrg3CtNrg1_pSyn_Gfp	DN419	15	5	39.695	0.12596
pSyn_Nrg3CtNrg1_pSyn_Gfp	DN419	16	9	41.577	0.216466
pSyn_Nrg3CtNrg1_pSyn_Gfp	DN419	17	6	44.179	0.135811
pSyn_Nrg3CtNrg1_pSyn_Gfp	DN419	18	2	46.428	0.0430775
pSyn_Nrg3CtNrg1_pSyn_Gfp	DN419	19	3	38.241	0.0784498
pSyn_Nrg3CtNrg1_pSyn_Gfp	DN419	20	3	39.79	0.0753958
pSyn_Nrg3CtNrg1_pSyn_Gfp	DN419	21	3	38.557	0.0778069
pSyn_Nrg3CtNrg1_pSyn_Gfp	DN439	1	11	52.779	0.208416
pSyn_Nrg3CtNrg1_pSyn_Gfp	DN439	2	7	40.011	0.174952
pSyn_Nrg3CtNrg1_pSyn_Gfp	DN439	3	3	42.288	0.0709421
pSyn_Nrg3CtNrg1_pSyn_Gfp	DN439	4	6	55.09	0.108913
pSyn_Nrg3CtNrg1_pSyn_Gfp	DN439	5	5	42.992	0.116301
pSyn_Nrg3CtNrg1_pSyn_Gfp	DN439	6	11	40.108	0.274259
pSyn_Nrg3CtNrg1_pSyn_Gfp	DN439	7	8	45.096	0.177399
pSyn_Nrg3CtNrg1_pSyn_Gfp	DN439	8	6	43.458	0.138064
pSyn_Nrg3CtNrg1_pSyn_Gfp	DN439	9	7	41.202	0.169895
pSyn_Nrg3CtNrg1_pSyn_Gfp	DN439	10	9	47.413	0.189821
pSyn_Nrg3CtNrg1_pSyn_Gfp	DN439	11	10	38.608	0.259014
pSyn_Nrg3CtNrg1_pSyn_Gfp	DN439	12	4	41.633	0.0960776
pSyn_Nrg3CtNrg1_pSyn_Gfp	DN439	13	3	32.925	0.0911162
pSyn_Nrg3CtNrg1_pSyn_Gfp	DN439	14	6	41.194	0.145652
pSyn_Nrg3CtNrg1_pSyn_Gfp	DN439	15	11	42.388	0.259507
pSyn_Nrg3CtNrg1_pSyn_Gfp	DN439	16	10	43.229	0.231326
pSyn_Nrg3CtNrg1_pSyn_Gfp	DN439	17	2	33.895	0.0590058
pSyn_Nrg3CtNrg1_pSyn_Gfp	DN439	18	5	41.645	0.120062
pSyn_Nrg3CtNrg1_pSyn_Gfp	DN439	19	7	40.314	0.173637
pSyn_Nrg3CtNrg1_pSyn_Gfp	DN439	20	4	51.431	0.0777741
pSyn_Nrg3CtNrg1_pSyn_Gfp	DN439	21	6	38.265	0.156801
pSyn_Nrg3CtNrg1_pSyn_Gfp	DN439	22	7	49.332	0.141896
pSyn_Nrg3CtNrg1_pSyn_Gfp	DN439	23	6	38.298	0.156666
pSyn_Nrg3CtNrg1_pSyn_Gfp	DN449	1	9	39.38	0.228542
pSyn_Nrg3CtNrg1_pSyn_Gfp	DN449	2	3	36.991	0.0811008
pSyn_Nrg3CtNrg1_pSyn_Gfp	DN449	3	11	41.442	0.265431
pSyn_Nrg3CtNrg1_pSyn_Gfp	DN449	4	5	41.012	0.121916
pSyn_Nrg3CtNrg1_pSyn_Gfp	DN449	5	13	44.599	0.291486
pSyn_Nrg3CtNrg1_pSyn_Gfp	DN449	6	4	40.438	0.0989169
pSyn_Nrg3CtNrg1_pSyn_Gfp	DN449	7	6	42.293	0.141867
pSyn_Nrg3CtNrg1_pSyn_Gfp	DN449	8	2	43.797	0.0456652
pSyn_Nrg3CtNrg1_pSyn_Gfp	DN449	9	8	45.059	0.177545
pSyn_Nrg3CtNrg1_pSyn_Gfp	DN449	10	7	47.004	0.148923
pSyn_Nrg3CtNrg1_pSyn_Gfp	DN449	11	6	45.289	0.132483
pSyn_Nrg3CtNrg1_pSyn_Gfp	DN449	12	1	45.117	0.0221646
pSyn_Nrg3CtNrg1_pSyn_Gfp	DN449	13	2	39.566	0.0505485
pSyn_Nrg3CtNrg1_pSyn_Gfp	DN449	14	6	47.493	0.126334
pSyn_Nrg3CtNrg1_pSyn_Gfp	DN449	15	7	36.396	0.192329
pSyn_Nrg3CtNrg1_pSyn_Gfp	DN449	16	1	38.752	0.0258051
pSyn_Nrg3CtNrg1_pSyn_Gfp	DN449	17	8	45.364	0.176351
pSyn_Nrg3CtNrg1_pSyn_Gfp	DN449	18	4	50.451	0.0792849
pSyn_Nrg3CtNrg1_pSyn_Gfp	DN449	19	10	41.22	0.242601
pSyn_Nrg3CtNrg1_pSyn_Gfp	DN449	20	4	45.628	0.0876655
pSyn_Nrg3CtNrg1_pSyn_Gfp	DN449	21	5	44.745	0.111744
pSyn_Nrg3CtNrg1_pSyn_Gfp	DN449	22	7	44.94	0.155763
pSyn_Nrg3CtNrg1_pSyn_Gfp	DN449	23	2	46.767	0.0427652
pSyn_Nrg3CtNrg1_pSyn_Gfp	DN406	1	6	44.747	0.134087
pSyn_Nrg3CtNrg1_pSyn_Gfp	DN406	2	2	35.427	0.0564541
pSyn_Nrg3CtNrg1_pSyn_Gfp	DN406	3	6	47.096	0.127399
pSyn_Nrg3CtNrg1_pSyn_Gfp	DN406	4	4	47.366	0.0844488
pSyn_Nrg3CtNrg1_pSyn_Gfp	DN406	5	5	42.945	0.116428
pSyn_Nrg3CtNrg1_pSyn_Gfp	DN406	6	5	50.681	0.0986563
pSyn_Nrg3CtNrg1_pSyn_Gfp	DN406	7	2	45.485	0.0439705
pSyn_Nrg3CtNrg1_pSyn_Gfp	DN406	8	9	41.742	0.21561
pSyn_Nrg3CtNrg1_pSyn_Gfp	DN406	9	4	40.424	0.0989511
pSyn_Nrg3CtNrg1_pSyn_Gfp	DN406	10	4	45.927	0.0870947
pSyn_Nrg3CtNrg1_pSyn_Gfp	DN406	11	5	40.566	0.123256
pSyn_Nrg3CtNrg1_pSyn_Gfp	DN406	12	5	52.008	0.0961391
pSyn_Nrg3CtNrg1_pSyn_Gfp	DN406	13	8	45.502	0.175816
pSyn_Nrg3CtNrg1_pSyn_Gfp	DN406	14	3	50.06	0.0599281
pSyn_Nrg3CtNrg1_pSyn_Gfp	DN406	15	5	43.715	0.114377
pSyn_Nrg3CtNrg1_pSyn_Gfp	DN406	16	2	44.315	0.0451314
pSyn_Nrg3CtNrg1_pSyn_Gfp	DN406	17	3	44.141	0.067964
pSyn_Nrg3CtNrg1_pSyn_Gfp	DN406	18	3	49.99	0.060012
pSyn_Nrg3CtNrg1_pSyn_Gfp	DN406	19	16	51.056	0.313381
pSyn_Nrg3CtNrg1_pSyn_Gfp	DN406	20	6	39.691	0.151168
pSyn_Nrg3CtNrg1_pSyn_Gfp	DN406	21	7	40.654	0.172185
pSyn_Nrg3CtNrg1_pSyn_Gfp	DN406	22	6	38.661	0.155195
pSyn_Nrg3CtNrg1_pSyn_Gfp	DN406	23	1	43.827	0.022817
pSyn_Nrg3CtNrg1_pSyn_Gfp	DN406	24	6	43.004	0.139522
pSyn_Nrg3CtNrg1_pSyn_Gfp	DN406	25	5	46.675	0.107124

## Sheet: Excitatory_synapses
Plasmid	Brain	Cell	Count_vglut1_tdt_psd95	Perimeter_cell	Density_vglut1_tdt_pds95
pSyn_Gfp	DN274	1	11	61.365	0.179255
pSyn_Gfp	DN274	2	9	67.807	0.13273
pSyn_Gfp	DN274	3	7	52.643	0.132971
pSyn_Gfp	DN274	4	2	51.068	0.0391635
pSyn_Gfp	DN274	5	13	62.412	0.208293
pSyn_Gfp	DN274	6	7	63.12	0.1109
pSyn_Gfp	DN274	7	0	56.118	0
pSyn_Gfp	DN274	8	4	55.309	0.072321
pSyn_Gfp	DN274	9	5	63.686	0.0785102
pSyn_Gfp	DN274	10	6	56.034	0.107078
pSyn_Gfp	DN274	11	4	49.5	0.0808081
pSyn_Gfp	DN274	12	3	59.979	0.0500175
pSyn_Gfp	DN274	13	10	61.604	0.162327
pSyn_Gfp	DN274	14	8	59.768	0.133851
pSyn_Gfp	DN274	15	10	54.008	0.185158
pSyn_Gfp	DN274	16	6	66.908	0.0896754
pSyn_Gfp	DN275	1	9	66.535	0.135267
pSyn_Gfp	DN275	2	4	70.719	0.0565619
pSyn_Gfp	DN275	3	19	56.976	0.333474
pSyn_Gfp	DN275	4	1	74.301	0.0134588
pSyn_Gfp	DN275	5	4	59.481	0.0672484
pSyn_Gfp	DN275	6	8	61.054	0.131032
pSyn_Gfp	DN275	7	8	65.673	0.121816
pSyn_Gfp	DN275	8	8	66.963	0.119469
pSyn_Gfp	DN275	9	2	57.557	0.0347482
pSyn_Gfp	DN275	10	5	60.917	0.0820789
pSyn_Gfp	DN275	11	9	63.574	0.141567
pSyn_Gfp	DN275	12	5	57.382	0.0871353
pSyn_Gfp	DN275	13	7	55.339	0.126493
pSyn_Gfp	DN275	14	5	63.201	0.0791127
pSyn_Gfp	DN275	15	5	59.373	0.0842134
pSyn_Gfp	DN275	16	3	48.487	0.0618723
pSyn_Gfp	DN275	17	9	72.116	0.124799
pSyn_Gfp	DN275	18	9	67.724	0.132892
pSyn_Gfp	DN275	19	5	65.331	0.0765333
pSyn_Gfp	DN275	20	6	64.194	0.0934667
pSyn_Gfp	DN275	21	6	62.209	0.0964491
pSyn_Gfp	DN277	1	1	55.324	0.0180753
pSyn_Gfp	DN277	2	3	55.095	0.0544514
pSyn_Gfp	DN277	3	7	61.809	0.113252
pSyn_Gfp	DN277	4	4	49.856	0.0802311
pSyn_Gfp	DN277	5	12	59.719	0.200941
pSyn_Gfp	DN277	6	10	60.429	0.165483
pSyn_Gfp	DN277	7	2	73.872	0.0270739
pSyn_Gfp	DN277	8	7	71.575	0.0977995
pSyn_Gfp	DN277	9	3	65.418	0.0458589
pSyn_Gfp	DN277	10	9	48.111	0.187067
pSyn_Gfp	DN277	11	5	66.545	0.0751371
pSyn_Gfp	DN277	12	7	57.911	0.120875
pSyn_Gfp	DN277	13	2	67.659	0.02956
pSyn_Gfp	DN277	14	6	48.674	0.123269
pSyn_Gfp	DN277	15	7	55.619	0.125856
pSyn_Gfp	DN277	16	7	48.443	0.1445
pSyn_Gfp	DN277	17	6	61.538	0.0975007
pSyn_Gfp	DN277	18	6	56.239	0.106688
pSyn_Gfp	DN277	19	3	62.937	0.0476667
pSyn_Gfp	DN277	20	6	57.702	0.103983
pSyn_Gfp	DN277	21	5	51.19	0.0976753
pSyn_Gfp	DN278	1	7	51.867	0.134961
pSyn_Gfp	DN278	2	3	51.534	0.058214
pSyn_Gfp	DN278	3	4	61.269	0.0652859
pSyn_Gfp	DN278	4	5	51.495	0.0970968
pSyn_Gfp	DN278	5	6	64.349	0.0932415
pSyn_Gfp	DN278	6	4	73.171	0.0546665
pSyn_Gfp	DN278	7	3	48.525	0.0618238
pSyn_Gfp	DN278	8	9	58.31	0.154347
pSyn_Gfp	DN278	9	4	59.662	0.0670444
pSyn_Gfp	DN278	10	6	54.817	0.109455
pSyn_Gfp	DN278	11	4	54.21	0.0737871
pSyn_Gfp	DN278	12	4	53.614	0.0746074
pSyn_Gfp	DN278	13	6	57.496	0.104355
pSyn_Gfp	DN278	14	3	59.786	0.050179
pSyn_Gfp	DN278	15	9	61.915	0.145361
pSyn_Gfp	DN278	16	8	61.677	0.129708
pSyn_Gfp	DN280	1	6	56.382	0.106417
pSyn_Gfp	DN280	2	6	55.175	0.108745
pSyn_Gfp	DN280	3	2	55.12	0.0362845
pSyn_Gfp	DN280	4	8	66.473	0.12035
pSyn_Gfp	DN280	5	8	56.822	0.140791
pSyn_Gfp	DN280	6	7	69.413	0.100846
pSyn_Gfp	DN280	7	5	83.317	0.0600118
pSyn_Gfp	DN280	8	5	61.318	0.0815421
pSyn_Gfp	DN280	9	5	58.508	0.0854584
pSyn_Gfp	DN280	10	12	65.445	0.18336
pSyn_Gfp	DN280	11	12	58.822	0.204005
pSyn_Gfp	DN280	12	8	66.613	0.120097
pSyn_Gfp	DN280	13	6	64.096	0.0936096
pSyn_Gfp	DN280	14	3	55.992	0.0535791
pSyn_Gfp	DN280	15	5	54.612	0.091555
pSyn_Gfp	DN280	16	7	64.738	0.108128
pSyn_Gfp	DN280	17	6	65.884	0.0910692
pSyn_Gfp	DN280	18	3	60.254	0.0497892
pSyn_Gfp	DN280	19	4	49.062	0.0815295
pSyn_Gfp	DN280	20	5	56.499	0.0884971
pSyn_Gfp	DN281	1	5	54.078	0.092459
pSyn_Gfp	DN281	2	2	48.582	0.0411675
pSyn_Gfp	DN281	3	4	44.754	0.0893775
pSyn_Gfp	DN281	4	6	62.794	0.0955505
pSyn_Gfp	DN281	5	3	50.23	0.0597253
pSyn_Gfp	DN281	6	5	54.946	0.0909984
pSyn_Gfp	DN281	7	6	62.053	0.0966915
pSyn_Gfp	DN281	8	6	54.307	0.110483
pSyn_Gfp	DN281	9	4	58.489	0.0683889
pSyn_Gfp	DN281	10	5	51.834	0.0964618
pSyn_Gfp	DN281	11	7	49.665	0.140944
pSyn_Gfp	DN281	12	7	60.958	0.114833
pSyn_Gfp	DN281	13	3	61.369	0.0488846
pSyn_Gfp	DN281	14	6	49.42	0.121408
pSyn_Gfp	DN281	15	7	47.627	0.146975
pSyn_Gfp	DN281	16	6	66.702	0.0899523
pSyn_Gfp	DN281	17	9	63.099	0.142633
pSyn_Gfp	DN281	18	9	52.805	0.170438
pSyn_Gfp	DN281	19	4	53.055	0.0753935
pSyn_Gfp	DN276	1	2	46.97	0.0425804
pSyn_Gfp	DN276	2	6	60.603	0.099005
pSyn_Gfp	DN276	3	6	56.827	0.105584
pSyn_Gfp	DN276	4	3	57.322	0.0523359
pSyn_Gfp	DN276	5	3	56.776	0.0528392
pSyn_Gfp	DN276	6	3	59.184	0.0506894
pSyn_Gfp	DN276	7	3	52.357	0.0572989
pSyn_Gfp	DN276	8	5	49.634	0.100737
pSyn_Gfp	DN276	9	9	61.169	0.147133
pSyn_Gfp	DN276	10	10	66.069	0.151357
pSyn_Gfp	DN276	11	3	56.683	0.0529259
pSyn_Gfp	DN276	12	6	50.713	0.118313
pSyn_Gfp	DN276	13	1	43.416	0.023033
pSyn_Gfp	DN276	14	8	53.838	0.148594
pSyn_Gfp	DN276	15	0	57.424	0
pSyn_Gfp	DN276	16	1	50.95	0.0196271
pSyn_Gfp	DN279	1	6	48.81	0.122926
pSyn_Gfp	DN279	2	5	46.626	0.107236
pSyn_Gfp	DN279	3	5	40.213	0.124338
pSyn_Gfp	DN279	4	2	56.888	0.0351568
pSyn_Gfp	DN279	5	10	70.992	0.140861
pSyn_Gfp	DN279	6	7	62.164	0.112605
pSyn_Gfp	DN279	7	3	51.219	0.058572
pSyn_Gfp	DN279	8	5	53.149	0.0940751
pSyn_Gfp	DN279	9	5	62	0.0806452
pSyn_Gfp	DN279	10	6	52.018	0.115345
pSyn_Gfp	DN279	11	12	50.708	0.236649
pSyn_Gfp	DN279	12	2	58.911	0.0339495
pSyn_Gfp	DN279	13	2	66.666	0.0300003
pSyn_Gfp	DN279	14	4	61.794	0.0647312
pSyn_Gfp	DN282	1	3	47.134	0.0636483
pSyn_Gfp	DN282	2	1	32.711	0.0305708
pSyn_Gfp	DN282	3	5	47.93	0.104319
pSyn_Gfp	DN282	4	4	38.85	0.10296
pSyn_Gfp	DN282	5	6	52.372	0.114565
pSyn_Gfp	DN282	6	11	64.738	0.169916
pSyn_Gfp	DN282	7	5	48.041	0.104078
pSyn_Gfp	DN282	8	6	58.799	0.102043
pSyn_Gfp	DN282	9	5	58.42	0.0855871
pSyn_Gfp	DN282	10	5	55.053	0.0908216
pSyn_Gfp	DN282	11	5	52.918	0.0944858
pSyn_Gfp	DN282	12	5	60.483	0.0826679
pSyn_Gfp	DN282	13	8	54.181	0.147653
pSyn_Gfp	DN282	14	7	63.582	0.110094
pSyn_Gfp	DN282	15	14	50.857	0.275282
pSyn_Gfp	DN282	16	5	43.812	0.114124
pSyn_Gfp	DN282	17	3	56.056	0.0535179
pSyn_Gfp	DN282	18	6	56.535	0.106129
pSyn_Gfp	DN282	19	3	62.456	0.0480338
pSyn_Gfp	DN282	20	11	62.263	0.17667
pSyn_Gfp	DN282	21	2	50.41	0.0396747
pSyn_Gfp	DN282	22	3	51.388	0.0583794
pSyn_Gfp	DN282	23	6	50.382	0.11909
pSyn_Gfp	DN282	24	12	53.894	0.222659
pSyn_Nrg1CtNrg3_pSyn_Gfp	DN427	1	9	55.049	0.163491
pSyn_Nrg1CtNrg3_pSyn_Gfp	DN427	2	5	52.801	0.0946952
pSyn_Nrg1CtNrg3_pSyn_Gfp	DN427	3	5	68.244	0.0732665
pSyn_Nrg1CtNrg3_pSyn_Gfp	DN427	4	3	56.323	0.0532642
pSyn_Nrg1CtNrg3_pSyn_Gfp	DN427	5	9	57.462	0.156625
pSyn_Nrg1CtNrg3_pSyn_Gfp	DN427	6	6	64.998	0.0923105
pSyn_Nrg1CtNrg3_pSyn_Gfp	DN427	7	7	59.223	0.118197
pSyn_Nrg1CtNrg3_pSyn_Gfp	DN427	8	1	56.268	0.0177721
pSyn_Nrg1CtNrg3_pSyn_Gfp	DN427	9	9	64.032	0.140555
pSyn_Nrg1CtNrg3_pSyn_Gfp	DN427	10	2	64.868	0.0308318
pSyn_Nrg1CtNrg3_pSyn_Gfp	DN427	11	2	52.679	0.0379658
pSyn_Nrg1CtNrg3_pSyn_Gfp	DN427	12	7	62.927	0.11124
pSyn_Nrg1CtNrg3_pSyn_Gfp	DN427	13	7	48.89	0.143179
pSyn_Nrg1CtNrg3_pSyn_Gfp	DN427	14	0	59.584	0
pSyn_Nrg1CtNrg3_pSyn_Gfp	DN427	15	10	69.022	0.144881
pSyn_Nrg1CtNrg3_pSyn_Gfp	DN427	16	14	56.411	0.248179
pSyn_Nrg1CtNrg3_pSyn_Gfp	DN427	17	7	69.301	0.101009
pSyn_Nrg1CtNrg3_pSyn_Gfp	DN427	18	2	55.42	0.0360881
pSyn_Nrg1CtNrg3_pSyn_Gfp	DN431	1	13	54.962	0.236527
pSyn_Nrg1CtNrg3_pSyn_Gfp	DN431	2	6	45.166	0.132843
pSyn_Nrg1CtNrg3_pSyn_Gfp	DN431	3	7	40.064	0.17472
pSyn_Nrg1CtNrg3_pSyn_Gfp	DN431	4	4	50.124	0.0798021
pSyn_Nrg1CtNrg3_pSyn_Gfp	DN431	5	8	59.375	0.134737
pSyn_Nrg1CtNrg3_pSyn_Gfp	DN431	6	3	60.65	0.0494641
pSyn_Nrg1CtNrg3_pSyn_Gfp	DN431	7	6	63.402	0.0946342
pSyn_Nrg1CtNrg3_pSyn_Gfp	DN431	8	3	45.373	0.0661186
pSyn_Nrg1CtNrg3_pSyn_Gfp	DN431	9	2	49.452	0.0404433
pSyn_Nrg1CtNrg3_pSyn_Gfp	DN431	10	2	70.14	0.0285144
pSyn_Nrg1CtNrg3_pSyn_Gfp	DN431	11	6	48.631	0.123378
pSyn_Nrg1CtNrg3_pSyn_Gfp	DN431	12	8	55.258	0.144775
pSyn_Nrg1CtNrg3_pSyn_Gfp	DN431	13	3	53.362	0.0562198
pSyn_Nrg1CtNrg3_pSyn_Gfp	DN431	14	6	65.447	0.0916772
pSyn_Nrg1CtNrg3_pSyn_Gfp	DN431	15	5	53.505	0.0934492
pSyn_Nrg1CtNrg3_pSyn_Gfp	DN431	16	13	53.837	0.24147
pSyn_Nrg1CtNrg3_pSyn_Gfp	DN431	17	6	44.681	0.134285
pSyn_Nrg1CtNrg3_pSyn_Gfp	DN432	1	16	60.216	0.26571
pSyn_Nrg1CtNrg3_pSyn_Gfp	DN432	2	5	61.255	0.081626
pSyn_Nrg1CtNrg3_pSyn_Gfp	DN432	3	12	49.406	0.242885
pSyn_Nrg1CtNrg3_pSyn_Gfp	DN432	4	6	44.998	0.133339
pSyn_Nrg1CtNrg3_pSyn_Gfp	DN432	5	11	64.465	0.170635
pSyn_Nrg1CtNrg3_pSyn_Gfp	DN432	6	4	63.472	0.0630199
pSyn_Nrg1CtNrg3_pSyn_Gfp	DN432	7	5	50.753	0.0985163
pSyn_Nrg1CtNrg3_pSyn_Gfp	DN432	8	6	56.936	0.105381
pSyn_Nrg1CtNrg3_pSyn_Gfp	DN432	9	5	49.306	0.101408
pSyn_Nrg1CtNrg3_pSyn_Gfp	DN432	10	2	47.855	0.0417929
pSyn_Nrg1CtNrg3_pSyn_Gfp	DN432	11	2	47.331	0.0422556
pSyn_Nrg1CtNrg3_pSyn_Gfp	DN432	12	1	51.05	0.0195886
pSyn_Nrg1CtNrg3_pSyn_Gfp	DN432	13	1	45.116	0.0221651
pSyn_Nrg1CtNrg3_pSyn_Gfp	DN413	1	5	54.97	0.0909587
pSyn_Nrg1CtNrg3_pSyn_Gfp	DN413	2	7	49.383	0.141749
pSyn_Nrg1CtNrg3_pSyn_Gfp	DN413	3	4	61.134	0.06543
pSyn_Nrg1CtNrg3_pSyn_Gfp	DN413	4	6	53.009	0.113188
pSyn_Nrg1CtNrg3_pSyn_Gfp	DN413	5	4	58.352	0.0685495
pSyn_Nrg1CtNrg3_pSyn_Gfp	DN413	6	7	54.189	0.129178
pSyn_Nrg1CtNrg3_pSyn_Gfp	DN413	7	15	58.715	0.255471
pSyn_Nrg1CtNrg3_pSyn_Gfp	DN413	8	7	49	0.142857
pSyn_Nrg1CtNrg3_pSyn_Gfp	DN413	9	8	53.457	0.149653
pSyn_Nrg1CtNrg3_pSyn_Gfp	DN413	10	1	51.775	0.0193143
pSyn_Nrg1CtNrg3_pSyn_Gfp	DN413	11	3	56.676	0.0529325
pSyn_Nrg1CtNrg3_pSyn_Gfp	DN416	1	4	52.902	0.0756115
pSyn_Nrg1CtNrg3_pSyn_Gfp	DN416	2	8	69.041	0.115873
pSyn_Nrg1CtNrg3_pSyn_Gfp	DN416	3	2	58.159	0.0343885
pSyn_Nrg1CtNrg3_pSyn_Gfp	DN416	4	7	64.987	0.107714
pSyn_Nrg1CtNrg3_pSyn_Gfp	DN416	5	14	58.255	0.240323
pSyn_Nrg1CtNrg3_pSyn_Gfp	DN416	6	9	55.188	0.163079
pSyn_Nrg1CtNrg3_pSyn_Gfp	DN416	7	5	55.076	0.0907836
pSyn_Nrg1CtNrg3_pSyn_Gfp	DN416	8	18	69.383	0.25943
pSyn_Nrg1CtNrg3_pSyn_Gfp	DN416	9	4	57.661	0.069371
pSyn_Nrg1CtNrg3_pSyn_Gfp	DN416	10	3	58.098	0.0516369
pSyn_Nrg1CtNrg3_pSyn_Gfp	DN416	11	5	47.645	0.104943
pSyn_Nrg1CtNrg3_pSyn_Gfp	DN416	12	10	68.511	0.145962
pSyn_Nrg1CtNrg3_pSyn_Gfp	DN416	13	3	45.753	0.0655695
pSyn_Nrg1CtNrg3_pSyn_Gfp	DN416	14	4	48.373	0.0826908
pSyn_Nrg1CtNrg3_pSyn_Gfp	DN416	15	9	54.152	0.166199
pSyn_Nrg1CtNrg3_pSyn_Gfp	DN416	16	11	54.208	0.202922
pSyn_Nrg1CtNrg3_pSyn_Gfp	DN416	17	8	52.795	0.15153
pSyn_Nrg1CtNrg3_pSyn_Gfp	DN416	18	10	55.86	0.179019
pSyn_Nrg1CtNrg3_pSyn_Gfp	DN416	19	1	51.771	0.0193158
pSyn_Nrg1CtNrg3_pSyn_Gfp	DN416	20	5	49.244	0.101535
pSyn_Nrg1CtNrg3_pSyn_Gfp	DN416	21	6	44.524	0.134759
pSyn_Nrg1CtNrg3_pSyn_Gfp	DN416	22	1	35.766	0.0279595
pSyn_Nrg1CtNrg3_pSyn_Gfp	DN417	1	3	53.76	0.0558036
pSyn_Nrg1CtNrg3_pSyn_Gfp	DN417	2	5	51.393	0.0972895
pSyn_Nrg1CtNrg3_pSyn_Gfp	DN417	3	6	49.289	0.121731
pSyn_Nrg1CtNrg3_pSyn_Gfp	DN417	4	4	45.724	0.0874814
pSyn_Nrg1CtNrg3_pSyn_Gfp	DN417	5	12	63.301	0.18957
pSyn_Nrg1CtNrg3_pSyn_Gfp	DN417	6	0	43.861	0
pSyn_Nrg1CtNrg3_pSyn_Gfp	DN417	7	1	44.507	0.0224684
pSyn_Nrg1CtNrg3_pSyn_Gfp	DN417	8	2	41.869	0.047768
pSyn_Nrg1CtNrg3_pSyn_Gfp	DN417	9	4	42.387	0.0943686
pSyn_Nrg1CtNrg3_pSyn_Gfp	DN417	10	5	54.37	0.0919625
pSyn_Nrg1CtNrg3_pSyn_Gfp	DN417	11	9	62.749	0.143429
pSyn_Nrg1CtNrg3_pSyn_Gfp	DN417	12	3	58.425	0.0513479
pSyn_Nrg1CtNrg3_pSyn_Gfp	DN417	13	5	48.975	0.102093
pSyn_Nrg1CtNrg3_pSyn_Gfp	DN417	14	8	60.485	0.132264
pSyn_Nrg1CtNrg3_pSyn_Gfp	DN417	15	9	57.469	0.156606
pSyn_Nrg1CtNrg3_pSyn_Gfp	DN417	16	3	64.454	0.0465448
pSyn_Nrg1CtNrg3_pSyn_Gfp	DN417	17	7	53.333	0.131251
pSyn_Nrg1CtNrg3_pSyn_Gfp	DN417	18	6	54.569	0.109953
pSyn_Nrg1CtNrg3_pSyn_Gfp	DN430	1	6	42.972	0.139626
pSyn_Nrg1CtNrg3_pSyn_Gfp	DN430	2	5	48.805	0.102449
pSyn_Nrg1CtNrg3_pSyn_Gfp	DN430	3	4	48.812	0.0819471
pSyn_Nrg1CtNrg3_pSyn_Gfp	DN430	4	6	45.796	0.131016
pSyn_Nrg1CtNrg3_pSyn_Gfp	DN430	5	5	68.033	0.0734937
pSyn_Nrg1CtNrg3_pSyn_Gfp	DN430	6	7	62.666	0.111703
pSyn_Nrg1CtNrg3_pSyn_Gfp	DN430	7	4	58.682	0.068164
pSyn_Nrg1CtNrg3_pSyn_Gfp	DN430	8	4	57.104	0.0700476
pSyn_Nrg1CtNrg3_pSyn_Gfp	DN430	9	3	52.395	0.0572574
pSyn_Nrg1CtNrg3_pSyn_Gfp	DN430	10	8	59.612	0.134201
pSyn_Nrg1CtNrg3_pSyn_Gfp	DN430	11	4	55.017	0.0727048
pSyn_Nrg1CtNrg3_pSyn_Gfp	DN430	12	8	62.564	0.127869
pSyn_Nrg1CtNrg3_pSyn_Gfp	DN430	13	5	53.032	0.0942827
pSyn_Nrg1CtNrg3_pSyn_Gfp	DN430	14	11	55.352	0.198728
pSyn_Nrg1CtNrg3_pSyn_Gfp	DN430	15	2	52.997	0.037738
pSyn_Nrg1CtNrg3_pSyn_Gfp	DN430	16	3	54.026	0.0555288
pSyn_Nrg1CtNrg3_pSyn_Gfp	DN430	17	7	55.648	0.125791
pSyn_Nrg1CtNrg3_pSyn_Gfp	DN430	18	3	55.946	0.0536231
pSyn_Nrg1CtNrg3_pSyn_Gfp	DN430	19	1	57.95	0.0172563
pSyn_Nrg1CtNrg3_pSyn_Gfp	DN430	20	4	50.094	0.0798499
pSyn_Nrg1CtNrg3_pSyn_Gfp	DN430	21	8	56.829	0.140773
pSyn_Nrg1CtNrg3_pSyn_Gfp	DN430	22	6	63.451	0.0945612
pSyn_Nrg3CtNrg1_pSyn_Gfp	DN437	1	5	63.551	0.078677
pSyn_Nrg3CtNrg1_pSyn_Gfp	DN437	2	7	64.97	0.107742
pSyn_Nrg3CtNrg1_pSyn_Gfp	DN437	3	7	60.716	0.115291
pSyn_Nrg3CtNrg1_pSyn_Gfp	DN437	4	11	58.317	0.188624
pSyn_Nrg3CtNrg1_pSyn_Gfp	DN437	5	5	54.707	0.091396
pSyn_Nrg3CtNrg1_pSyn_Gfp	DN437	6	4	54.585	0.0732802
pSyn_Nrg3CtNrg1_pSyn_Gfp	DN437	7	12	62.913	0.19074
pSyn_Nrg3CtNrg1_pSyn_Gfp	DN437	8	9	59.019	0.152493
pSyn_Nrg3CtNrg1_pSyn_Gfp	DN437	9	2	67.959	0.0294295
pSyn_Nrg3CtNrg1_pSyn_Gfp	DN437	10	2	55.244	0.036203
pSyn_Nrg3CtNrg1_pSyn_Gfp	DN437	11	10	56.911	0.175713
pSyn_Nrg3CtNrg1_pSyn_Gfp	DN437	12	8	59.753	0.133884
pSyn_Nrg3CtNrg1_pSyn_Gfp	DN437	13	4	47.097	0.0849311
pSyn_Nrg3CtNrg1_pSyn_Gfp	DN437	14	9	56.08	0.160485
pSyn_Nrg3CtNrg1_pSyn_Gfp	DN437	15	7	58.101	0.12048
pSyn_Nrg3CtNrg1_pSyn_Gfp	DN437	16	13	66.91	0.194291
pSyn_Nrg3CtNrg1_pSyn_Gfp	DN437	17	5	56.524	0.088458
pSyn_Nrg3CtNrg1_pSyn_Gfp	DN437	18	6	57.832	0.103749
pSyn_Nrg3CtNrg1_pSyn_Gfp	DN437	19	7	60.935	0.114877
pSyn_Nrg3CtNrg1_pSyn_Gfp	DN437	20	5	59.441	0.084117
pSyn_Nrg3CtNrg1_pSyn_Gfp	DN436	1	9	48.108	0.187079
pSyn_Nrg3CtNrg1_pSyn_Gfp	DN436	2	8	57.122	0.140051
pSyn_Nrg3CtNrg1_pSyn_Gfp	DN436	3	7	55.416	0.126317
pSyn_Nrg3CtNrg1_pSyn_Gfp	DN436	4	2	58.553	0.0341571
pSyn_Nrg3CtNrg1_pSyn_Gfp	DN436	5	4	52.503	0.0761861
pSyn_Nrg3CtNrg1_pSyn_Gfp	DN436	6	10	47.733	0.209499
pSyn_Nrg3CtNrg1_pSyn_Gfp	DN436	7	0	49.357	0
pSyn_Nrg3CtNrg1_pSyn_Gfp	DN436	8	6	56.212	0.106739
pSyn_Nrg3CtNrg1_pSyn_Gfp	DN436	9	1	50.43	0.0198295
pSyn_Nrg3CtNrg1_pSyn_Gfp	DN436	10	2	46.101	0.043383
pSyn_Nrg3CtNrg1_pSyn_Gfp	DN436	11	4	62.505	0.0639949
pSyn_Nrg3CtNrg1_pSyn_Gfp	DN436	12	2	58.78	0.0340252
pSyn_Nrg3CtNrg1_pSyn_Gfp	DN436	13	4	51.591	0.0775329
pSyn_Nrg3CtNrg1_pSyn_Gfp	DN436	14	8	64.874	0.123316
pSyn_Nrg3CtNrg1_pSyn_Gfp	DN436	15	2	65.363	0.0305984
pSyn_Nrg3CtNrg1_pSyn_Gfp	DN436	16	3	51.892	0.0578124
pSyn_Nrg3CtNrg1_pSyn_Gfp	DN438	1	1	48.818	0.0204842
pSyn_Nrg3CtNrg1_pSyn_Gfp	DN438	2	9	53.58	0.167973
pSyn_Nrg3CtNrg1_pSyn_Gfp	DN438	3	6	59.601	0.100669
pSyn_Nrg3CtNrg1_pSyn_Gfp	DN438	4	10	62.117	0.160987
pSyn_Nrg3CtNrg1_pSyn_Gfp	DN438	5	1	60.363	0.0165664
pSyn_Nrg3CtNrg1_pSyn_Gfp	DN438	6	1	51.492	0.0194205
pSyn_Nrg3CtNrg1_pSyn_Gfp	DN438	7	1	50.575	0.0197726
pSyn_Nrg3CtNrg1_pSyn_Gfp	DN438	8	13	63.648	0.204248
pSyn_Nrg3CtNrg1_pSyn_Gfp	DN438	9	5	50.497	0.0990158
pSyn_Nrg3CtNrg1_pSyn_Gfp	DN438	10	4	60.143	0.0665082
pSyn_Nrg3CtNrg1_pSyn_Gfp	DN438	11	14	61.221	0.22868
pSyn_Nrg3CtNrg1_pSyn_Gfp	DN438	12	4	52.293	0.0764921
pSyn_Nrg3CtNrg1_pSyn_Gfp	DN438	13	6	56.286	0.106598
pSyn_Nrg3CtNrg1_pSyn_Gfp	DN438	14	3	49.384	0.0607484
pSyn_Nrg3CtNrg1_pSyn_Gfp	DN438	15	4	50.047	0.0799249
pSyn_Nrg3CtNrg1_pSyn_Gfp	DN406	1	13	65.219	0.199328
pSyn_Nrg3CtNrg1_pSyn_Gfp	DN406	2	3	57.317	0.0523405
pSyn_Nrg3CtNrg1_pSyn_Gfp	DN406	3	3	56.502	0.0530955
pSyn_Nrg3CtNrg1_pSyn_Gfp	DN406	4	3	42.659	0.0703251
pSyn_Nrg3CtNrg1_pSyn_Gfp	DN406	5	5	66.636	0.0750345
pSyn_Nrg3CtNrg1_pSyn_Gfp	DN406	6	5	50.861	0.0983072
pSyn_Nrg3CtNrg1_pSyn_Gfp	DN406	7	2	62.105	0.0322035
pSyn_Nrg3CtNrg1_pSyn_Gfp	DN406	8	7	54.504	0.128431
pSyn_Nrg3CtNrg1_pSyn_Gfp	DN406	9	12	65.714	0.182609
pSyn_Nrg3CtNrg1_pSyn_Gfp	DN406	10	4	52.23	0.0765843
pSyn_Nrg3CtNrg1_pSyn_Gfp	DN406	11	4	66.029	0.0605794
pSyn_Nrg3CtNrg1_pSyn_Gfp	DN406	12	4	48.614	0.0822808
pSyn_Nrg3CtNrg1_pSyn_Gfp	DN406	13	8	58.162	0.137547
pSyn_Nrg3CtNrg1_pSyn_Gfp	DN406	14	1	52.199	0.0191575
pSyn_Nrg3CtNrg1_pSyn_Gfp	DN406	15	7	58.319	0.120029
pSyn_Nrg3CtNrg1_pSyn_Gfp	DN406	16	5	67.49	0.074085
pSyn_Nrg3CtNrg1_pSyn_Gfp	DN406	17	9	65.953	0.136461
pSyn_Nrg3CtNrg1_pSyn_Gfp	DN406	18	5	57.312	0.0872418
pSyn_Nrg3CtNrg1_pSyn_Gfp	DN406	19	4	59.699	0.0670028
pSyn_Nrg3CtNrg1_pSyn_Gfp	DN406	20	11	63.693	0.172703
pSyn_Nrg3CtNrg1_pSyn_Gfp	DN406	21	6	56.67	0.105876
pSyn_Nrg3CtNrg1_pSyn_Gfp	DN406	22	3	49.395	0.0607349
pSyn_Nrg3CtNrg1_pSyn_Gfp	DN406	23	5	56.371	0.0886981
pSyn_Nrg3CtNrg1_pSyn_Gfp	DN406	24	3	55.414	0.0541379
pSyn_Nrg3CtNrg1_pSyn_Gfp	DN449	1	2	51.347	0.0389507
pSyn_Nrg3CtNrg1_pSyn_Gfp	DN449	2	8	50.186	0.159407
pSyn_Nrg3CtNrg1_pSyn_Gfp	DN449	3	12	51.892	0.23125
pSyn_Nrg3CtNrg1_pSyn_Gfp	DN449	4	7	56.524	0.123841
pSyn_Nrg3CtNrg1_pSyn_Gfp	DN449	5	12	61.052	0.196554
pSyn_Nrg3CtNrg1_pSyn_Gfp	DN449	6	3	52.002	0.0576901
pSyn_Nrg3CtNrg1_pSyn_Gfp	DN449	7	3	61.628	0.0486792
pSyn_Nrg3CtNrg1_pSyn_Gfp	DN449	8	13	51.128	0.254264
pSyn_Nrg3CtNrg1_pSyn_Gfp	DN449	9	3	55.624	0.0539336
pSyn_Nrg3CtNrg1_pSyn_Gfp	DN449	10	8	51.946	0.154006
pSyn_Nrg3CtNrg1_pSyn_Gfp	DN449	11	9	53.203	0.169163
pSyn_Nrg3CtNrg1_pSyn_Gfp	DN449	12	4	46.74	0.0855798
pSyn_Nrg3CtNrg1_pSyn_Gfp	DN449	13	6	46.016	0.130389
pSyn_Nrg3CtNrg1_pSyn_Gfp	DN449	14	4	62.571	0.0639274
pSyn_Nrg3CtNrg1_pSyn_Gfp	DN449	15	5	54.972	0.0909554
pSyn_Nrg3CtNrg1_pSyn_Gfp	DN449	16	4	51.95	0.0769971
pSyn_Nrg3CtNrg1_pSyn_Gfp	DN449	17	5	67.24	0.0743605
pSyn_Nrg3CtNrg1_pSyn_Gfp	DN449	18	8	60.119	0.133069
pSyn_Nrg3CtNrg1_pSyn_Gfp	DN449	19	5	60.34	0.0828638
pSyn_Nrg3CtNrg1_pSyn_Gfp	DN449	20	6	55.629	0.107857
pSyn_Nrg3CtNrg1_pSyn_Gfp	DN449	21	7	42.914	0.163117
pSyn_Nrg3CtNrg1_pSyn_Gfp	DN449	22	5	50.479	0.0990511
pSyn_Nrg3CtNrg1_pSyn_Gfp	DN449	23	9	65.436	0.137539
pSyn_Nrg3CtNrg1_pSyn_Gfp	DN449	24	5	59.477	0.0840661
pSyn_Nrg3CtNrg1_pSyn_Gfp	DN449	25	10	59.75	0.167364
pSyn_Nrg3CtNrg1_pSyn_Gfp	DN449	26	5	57.023	0.0876839
pSyn_Nrg3CtNrg1_pSyn_Gfp	DN419	1	4	49.466	0.0808636
pSyn_Nrg3CtNrg1_pSyn_Gfp	DN419	2	5	57.655	0.0867227
pSyn_Nrg3CtNrg1_pSyn_Gfp	DN419	3	12	56.3	0.213144
pSyn_Nrg3CtNrg1_pSyn_Gfp	DN419	4	12	52.869	0.226976
pSyn_Nrg3CtNrg1_pSyn_Gfp	DN419	5	5	54.7	0.0914077
pSyn_Nrg3CtNrg1_pSyn_Gfp	DN419	6	7	66.638	0.105045
pSyn_Nrg3CtNrg1_pSyn_Gfp	DN419	7	7	51.46	0.136028
pSyn_Nrg3CtNrg1_pSyn_Gfp	DN419	8	2	47.36	0.0422297
pSyn_Nrg3CtNrg1_pSyn_Gfp	DN419	9	3	81.188	0.0369513
pSyn_Nrg3CtNrg1_pSyn_Gfp	DN419	10	7	60.647	0.115422
pSyn_Nrg3CtNrg1_pSyn_Gfp	DN419	11	8	68.274	0.117175
pSyn_Nrg3CtNrg1_pSyn_Gfp	DN419	12	5	55.875	0.0894855
pSyn_Nrg3CtNrg1_pSyn_Gfp	DN419	13	4	49.529	0.0807608
pSyn_Nrg3CtNrg1_pSyn_Gfp	DN419	14	11	54.692	0.201126
pSyn_Nrg3CtNrg1_pSyn_Gfp	DN419	15	4	44.933	0.0890214
pSyn_Nrg3CtNrg1_pSyn_Gfp	DN419	16	5	44.381	0.112661
pSyn_Nrg3CtNrg1_pSyn_Gfp	DN419	17	2	50.189	0.0398494
pSyn_Nrg3CtNrg1_pSyn_Gfp	DN419	18	1	45.672	0.0218953
pSyn_Nrg3CtNrg1_pSyn_Gfp	DN419	19	4	51.343	0.0779074
pSyn_Nrg3CtNrg1_pSyn_Gfp	DN419	20	6	55.93	0.107277
pSyn_Nrg3CtNrg1_pSyn_Gfp	DN419	21	6	61.044	0.0982898
pSyn_Nrg3CtNrg1_pSyn_Gfp	DN439	1	3	42.828	0.0700476
pSyn_Nrg3CtNrg1_pSyn_Gfp	DN439	2	11	63.298	0.173781
pSyn_Nrg3CtNrg1_pSyn_Gfp	DN439	3	9	55.059	0.163461
pSyn_Nrg3CtNrg1_pSyn_Gfp	DN439	4	5	54.333	0.0920251
pSyn_Nrg3CtNrg1_pSyn_Gfp	DN439	5	7	67.672	0.10344
pSyn_Nrg3CtNrg1_pSyn_Gfp	DN439	6	1	58.669	0.0170448
pSyn_Nrg3CtNrg1_pSyn_Gfp	DN439	7	6	51.86	0.115696
pSyn_Nrg3CtNrg1_pSyn_Gfp	DN439	8	11	45.748	0.240448
pSyn_Nrg3CtNrg1_pSyn_Gfp	DN439	9	4	43.335	0.0923041
pSyn_Nrg3CtNrg1_pSyn_Gfp	DN439	10	3	55.695	0.0538648
pSyn_Nrg3CtNrg1_pSyn_Gfp	DN439	11	1	49.65	0.020141
pSyn_Nrg3CtNrg1_pSyn_Gfp	DN439	12	2	51.944	0.038503
pSyn_Nrg3CtNrg1_pSyn_Gfp	DN439	13	5	61.37	0.081473
