# Supplementary material for: Subcellular sorting of neuregulins controls the assembly of excitatory-inhibitory cortical circuits
Source: eLife. 2020 Dec 15;9:e57000. doi: 10.7554/eLife.57000 (PMC7755390; doi:10.7554/eLife.57000)
Supplement: Figure 6—figure supplement 1—source data 1. [file elife-57000-fig6-figsupp1-data1.xlsx]

## Sheet: HA_GAD65_GFPsoma
Plasmid	Brain	Cell	Count_gad65	Count_gad65_ha	Perimeter_cell	Density_gad65	Density_gad65_ha	Proportion_ha_gad65
pSyn_Nrg1_pSyn_Gfp	DN185	1	3	2	46.208	0.0649238	0.0432825	0.666667
pSyn_Nrg1_pSyn_Gfp	DN185	2	10	6	47.572	0.210208	0.126125	0.6
pSyn_Nrg1_pSyn_Gfp	DN185	3	10	2	49.884	0.200465	0.040093	0.2
pSyn_Nrg1_pSyn_Gfp	DN185	4	3	2	43.349	0.0692057	0.0461372	0.666667
pSyn_Nrg1_pSyn_Gfp	DN186	1	10	5	44.939	0.222524	0.111262	0.5
pSyn_Nrg1_pSyn_Gfp	DN186	2	16	5	50.303	0.318072	0.0993977	0.3125
pSyn_Nrg1_pSyn_Gfp	DN186	3	12	5	42.806	0.280335	0.116806	0.416667
pSyn_Nrg1_pSyn_Gfp	DN186	4	17	8	36.446	0.466444	0.219503	0.470588
pSyn_Nrg1_pSyn_Gfp	DN186	5	15	14	49.685	0.301902	0.281775	0.933333
pSyn_Nrg1_pSyn_Gfp	DN186	6	16	15	42.359	0.377724	0.354116	0.9375
pSyn_Nrg1_pSyn_Gfp	DN186	7	9	4	35.245	0.255355	0.113491	0.444444
pSyn_Nrg1_pSyn_Gfp	DN186	8	16	10	40.158	0.398426	0.249016	0.625
pSyn_Nrg1_pSyn_Gfp	DN186	9	21	17	51.951	0.404227	0.327231	0.809524
pSyn_Nrg1_pSyn_Gfp	DN186	10	18	11	45.233	0.39794	0.243185	0.611111
pSyn_Nrg1_pSyn_Gfp	DN186	11	10	5	41.836	0.239029	0.119514	0.5
pSyn_Nrg1_pSyn_Gfp	DN186	12	12	2	56.18	0.213599	0.0355999	0.166667
pSyn_Nrg1_pSyn_Gfp	DN190	1	11	8	46.938	0.234352	0.170438	0.727273
pSyn_Nrg1_pSyn_Gfp	DN190	2	12	9	44.222	0.271358	0.203519	0.75
pSyn_Nrg1_pSyn_Gfp	DN190	3	16	16	47.229	0.338775	0.338775	1
pSyn_Nrg1_pSyn_Gfp	DN190	4	16	12	51.952	0.307977	0.230982	0.75
pSyn_Nrg1_pSyn_Gfp	DN190	5	11	7	36.721	0.299556	0.190627	0.636364
pSyn_Nrg1_pSyn_Gfp	DN190	6	18	11	47.805	0.37653	0.230101	0.611111
pSyn_Nrg1_pSyn_Gfp	DN190	7	10	6	44.508	0.224679	0.134807	0.6
pSyn_Nrg1_pSyn_Gfp	DN190	8	13	3	43.171	0.301128	0.0694911	0.230769
pSyn_Nrg1_pSyn_Gfp	DN193	1	16	5	33.746	0.47413	0.148166	0.3125
pSyn_Nrg1_pSyn_Gfp	DN193	2	8	8	32.991	0.24249	0.24249	1
pSyn_Nrg1_pSyn_Gfp	DN193	3	14	9	41.781	0.335081	0.215409	0.642857
pSyn_Nrg1_pSyn_Gfp	DN193	4	12	11	44.109	0.272053	0.249382	0.916667
pSyn_Nrg1_pSyn_Gfp	DN193	5	5	4	31.82	0.157134	0.125707	0.8
pSyn_Nrg1_pSyn_Gfp	DN193	6	12	7	35.899	0.334271	0.194992	0.583333
pSyn_Nrg1_pSyn_Gfp	DN193	7	15	7	45.08	0.332742	0.15528	0.466667
pSyn_Nrg1_pSyn_Gfp	DN193	8	11	3	44.515	0.247108	0.067393	0.272727
pSyn_Nrg1_pSyn_Gfp	DN193	9	8	8	49.85	0.160481	0.160481	1
pSyn_Nrg1_pSyn_Gfp	DN193	10	17	13	49.836	0.341119	0.260856	0.764706
pSyn_Nrg3_pSyn_Gfp	DN194	1	19	0	46.661	0.407192	0	0
pSyn_Nrg3_pSyn_Gfp	DN194	2	19	1	44.822	0.423899	0.0223105	0.0526316
pSyn_Nrg3_pSyn_Gfp	DN194	3	12	1	36.579	0.328057	0.0273381	0.0833333
pSyn_Nrg3_pSyn_Gfp	DN194	4	12	2	45.685	0.262668	0.043778	0.166667
pSyn_Nrg3_pSyn_Gfp	DN194	5	17	0	41.204	0.412581	0	0
pSyn_Nrg3_pSyn_Gfp	DN194	6	23	1	49.578	0.463915	0.0201702	0.0434783
pSyn_Nrg3_pSyn_Gfp	DN194	7	16	0	46.89	0.341224	0	0
pSyn_Nrg3_pSyn_Gfp	DN194	8	12	1	44.659	0.268703	0.0223919	0.0833333
pSyn_Nrg3_pSyn_Gfp	DN195	1	14	0	48.872	0.286463	0	0
pSyn_Nrg3_pSyn_Gfp	DN195	2	23	2	47.348	0.485765	0.0422404	0.0869565
pSyn_Nrg3_pSyn_Gfp	DN195	3	17	0	46.683	0.364158	0	0
pSyn_Nrg3_pSyn_Gfp	DN195	4	23	0	43.263	0.531632	0	0
pSyn_Nrg3_pSyn_Gfp	DN195	5	31	0	55.422	0.559345	0	0
pSyn_Nrg3_pSyn_Gfp	DN195	6	25	1	56.124	0.445442	0.0178177	0.04
pSyn_Nrg3_pSyn_Gfp	DN195	7	16	0	39.808	0.401929	0	0
pSyn_Nrg3_pSyn_Gfp	DN195	8	23	0	42.715	0.538453	0	0
pSyn_Nrg3_pSyn_Gfp	DN196	1	12	0	36.812	0.325981	0	0
pSyn_Nrg3_pSyn_Gfp	DN196	2	21	1	52.086	0.403179	0.019199	0.047619
pSyn_Nrg3_pSyn_Gfp	DN196	3	19	0	45.132	0.420987	0	0
pSyn_Nrg3_pSyn_Gfp	DN196	4	9	0	38.874	0.231517	0	0
pSyn_Nrg3_pSyn_Gfp	DN196	5	14	0	48.401	0.28925	0	0
pSyn_Nrg3_pSyn_Gfp	DN196	6	20	1	53.77	0.371955	0.0185977	0.05
pSyn_Nrg3_pSyn_Gfp	DN196	7	15	0	41.8	0.358852	0	0
pSyn_Nrg3_pSyn_Gfp	DN196	8	21	0	48.317	0.43463	0	0
pSyn_Nrg3_pSyn_Gfp	DN197	1	17	0	42.157	0.403255	0	0
pSyn_Nrg3_pSyn_Gfp	DN197	2	15	0	40.797	0.367674	0	0
pSyn_Nrg3_pSyn_Gfp	DN197	3	27	2	57.44	0.470056	0.0348189	0.0740741
pSyn_Nrg3_pSyn_Gfp	DN197	4	23	0	38.759	0.593411	0	0
pSyn_Nrg3_pSyn_Gfp	DN197	5	20	3	52.477	0.381119	0.0571679	0.15
pSyn_Nrg3_pSyn_Gfp	DN197	6	26	0	51.914	0.500828	0	0
pSyn_Nrg3_pSyn_Gfp	DN197	7	25	1	53.627	0.466183	0.0186473	0.04
pSyn_Nrg3_pSyn_Gfp	DN197	8	18	0	53.405	0.337047	0	0
pSyn_Nrg1deltaCt_pSyn_Gfp	DN530	1	12	8	33.929	0.35368	0.235786	0.666667
pSyn_Nrg1deltaCt_pSyn_Gfp	DN530	2	12	5	30.018	0.39976	0.166567	0.416667
pSyn_Nrg1deltaCt_pSyn_Gfp	DN530	3	8	5	29.811	0.268357	0.167723	0.625
pSyn_Nrg1deltaCt_pSyn_Gfp	DN530	4	12	4	36.896	0.325239	0.108413	0.333333
pSyn_Nrg1deltaCt_pSyn_Gfp	DN530	5	15	4	29.432	0.509649	0.135906	0.266667
pSyn_Nrg1deltaCt_pSyn_Gfp	DN530	6	14	3	34.75	0.402878	0.0863309	0.214286
pSyn_Nrg1deltaCt_pSyn_Gfp	DN530	7	6	0	35.269	0.170121	0	0
pSyn_Nrg1deltaCt_pSyn_Gfp	DN530	8	26	3	46.198	0.562795	0.0649379	0.115385
pSyn_Nrg1deltaCt_pSyn_Gfp	DN542	1	8	8	28.996	0.2759	0.2759	1
pSyn_Nrg1deltaCt_pSyn_Gfp	DN542	2	18	12	38.729	0.464768	0.309845	0.666667
pSyn_Nrg1deltaCt_pSyn_Gfp	DN542	3	18	3	43.44	0.414365	0.0690608	0.166667
pSyn_Nrg1deltaCt_pSyn_Gfp	DN542	4	14	1	41.552	0.336927	0.0240662	0.0714286
pSyn_Nrg1deltaCt_pSyn_Gfp	DN542	5	15	5	27.727	0.540989	0.18033	0.333333
pSyn_Nrg1deltaCt_pSyn_Gfp	DN542	6	13	8	36.716	0.354069	0.217889	0.615385
pSyn_Nrg1deltaCt_pSyn_Gfp	DN542	7	11	2	29.353	0.374749	0.0681361	0.181818
pSyn_Nrg1deltaCt_pSyn_Gfp	DN542	8	9	0	30.177	0.29824	0	0
pSyn_Nrg1deltaCt_pSyn_Gfp	DN543	1	15	2	34.684	0.432476	0.0576635	0.133333
pSyn_Nrg1deltaCt_pSyn_Gfp	DN543	2	8	7	31.745	0.252008	0.220507	0.875
pSyn_Nrg1deltaCt_pSyn_Gfp	DN543	3	13	13	32.52	0.399754	0.399754	1
pSyn_Nrg1deltaCt_pSyn_Gfp	DN543	4	12	12	30.268	0.396458	0.396458	1
pSyn_Nrg1deltaCt_pSyn_Gfp	DN543	5	12	0	35.128	0.341608	0	0
pSyn_Nrg1deltaCt_pSyn_Gfp	DN543	6	10	4	29.676	0.336973	0.134789	0.4
pSyn_Nrg1deltaCt_pSyn_Gfp	DN543	7	16	5	37.518	0.426462	0.133269	0.3125
pSyn_Nrg1deltaCt_pSyn_Gfp	DN543	8	13	1	36.449	0.356663	0.0274356	0.0769231
pSyn_Nrg1deltaCt_pSyn_Gfp	DN544	1	6	6	25.045	0.239569	0.239569	1
pSyn_Nrg1deltaCt_pSyn_Gfp	DN544	2	11	10	33.116	0.332166	0.301969	0.909091
pSyn_Nrg1deltaCt_pSyn_Gfp	DN544	3	9	3	35.435	0.253986	0.0846621	0.333333
pSyn_Nrg1deltaCt_pSyn_Gfp	DN544	4	12	3	37.634	0.318861	0.0797152	0.25
pSyn_Nrg1deltaCt_pSyn_Gfp	DN544	5	11	8	31.591	0.3482	0.253237	0.727273
pSyn_Nrg1deltaCt_pSyn_Gfp	DN544	6	14	2	28.377	0.493357	0.0704796	0.142857
pSyn_Nrg1deltaCt_pSyn_Gfp	DN544	7	13	0	34.994	0.371492	0	0
pSyn_Nrg1deltaCt_pSyn_Gfp	DN544	8	13	1	27.487	0.472951	0.0363808	0.0769231
pSyn_Nrg1deltaCt_pSyn_Gfp	DN544	9	20	15	36.006	0.555463	0.416597	0.75
pSyn_Nrg1deltaCt_pSyn_Gfp	DN544	10	17	0	39.292	0.432658	0	0
pSyn_Nrg3deltaCt_pSyn_Gfp	DN536	1	7	5	34.621	0.202189	0.144421	0.714286
pSyn_Nrg3deltaCt_pSyn_Gfp	DN536	2	13	8	38.595	0.336831	0.207281	0.615385
pSyn_Nrg3deltaCt_pSyn_Gfp	DN536	3	15	5	35.731	0.419804	0.139935	0.333333
pSyn_Nrg3deltaCt_pSyn_Gfp	DN536	4	12	1	39.746	0.301917	0.0251598	0.0833333
pSyn_Nrg3deltaCt_pSyn_Gfp	DN536	5	13	9	41.408	0.313949	0.217349	0.692308
pSyn_Nrg3deltaCt_pSyn_Gfp	DN536	6	12	2	35.818	0.335027	0.0558378	0.166667
pSyn_Nrg3deltaCt_pSyn_Gfp	DN536	7	13	1	34.853	0.372995	0.0286919	0.0769231
pSyn_Nrg3deltaCt_pSyn_Gfp	DN536	8	19	1	38.138	0.498191	0.0262206	0.0526316
pSyn_Nrg3deltaCt_pSyn_Gfp	DN536	9	21	1	41.052	0.511546	0.0243593	0.047619
pSyn_Nrg3deltaCt_pSyn_Gfp	DN545	1	14	11	37.971	0.368702	0.289695	0.785714
pSyn_Nrg3deltaCt_pSyn_Gfp	DN545	2	20	2	40.291	0.496389	0.0496389	0.1
pSyn_Nrg3deltaCt_pSyn_Gfp	DN545	3	16	1	38.775	0.412637	0.0257898	0.0625
pSyn_Nrg3deltaCt_pSyn_Gfp	DN545	4	8	1	36.517	0.219076	0.0273845	0.125
pSyn_Nrg3deltaCt_pSyn_Gfp	DN545	5	12	2	47.652	0.251826	0.041971	0.166667
pSyn_Nrg3deltaCt_pSyn_Gfp	DN545	6	14	12	43.494	0.321883	0.2759	0.857143
pSyn_Nrg3deltaCt_pSyn_Gfp	DN545	7	14	2	34.295	0.408223	0.0583175	0.142857
pSyn_Nrg3deltaCt_pSyn_Gfp	DN545	8	13	2	37.896	0.343044	0.052776	0.153846
pSyn_Nrg3deltaCt_pSyn_Gfp	DN545	9	17	3	52.326	0.324886	0.0573329	0.176471
pSyn_Nrg3deltaCt_pSyn_Gfp	DN545	10	20	5	53.318	0.375108	0.093777	0.25
pSyn_Nrg3deltaCt_pSyn_Gfp	DN548	1	9	5	36.152	0.248949	0.138305	0.555556
pSyn_Nrg3deltaCt_pSyn_Gfp	DN548	2	16	15	40.526	0.394808	0.370133	0.9375
pSyn_Nrg3deltaCt_pSyn_Gfp	DN548	3	18	2	48.459	0.371448	0.041272	0.111111
pSyn_Nrg3deltaCt_pSyn_Gfp	DN548	4	21	4	48.206	0.43563	0.0829772	0.190476
pSyn_Nrg3deltaCt_pSyn_Gfp	DN548	5	14	5	50.008	0.279955	0.099984	0.357143
pSyn_Nrg3deltaCt_pSyn_Gfp	DN548	6	18	3	44.234	0.406927	0.0678211	0.166667
pSyn_Nrg3deltaCt_pSyn_Gfp	DN548	7	20	7	48.387	0.413334	0.144667	0.35
pSyn_Nrg3deltaCt_pSyn_Gfp	DN548	8	23	4	49.838	0.461495	0.08026	0.173913
pSyn_Nrg3deltaCt_pSyn_Gfp	DN549	1	13	7	38.96	0.333676	0.179671	0.538462
pSyn_Nrg3deltaCt_pSyn_Gfp	DN549	2	18	3	44.156	0.407646	0.0679409	0.166667
pSyn_Nrg3deltaCt_pSyn_Gfp	DN549	3	17	1	44.631	0.380901	0.022406	0.0588235
pSyn_Nrg3deltaCt_pSyn_Gfp	DN549	4	30	8	55.458	0.54095	0.144253	0.266667
pSyn_Nrg3deltaCt_pSyn_Gfp	DN549	5	19	3	42.809	0.443832	0.0700787	0.157895
pSyn_Nrg3deltaCt_pSyn_Gfp	DN549	6	17	3	44.162	0.384946	0.0679317	0.176471
pSyn_Nrg3deltaCt_pSyn_Gfp	DN549	7	14	9	57.662	0.242794	0.156082	0.642857
pSyn_Nrg3deltaCt_pSyn_Gfp	DN549	8	12	9	47.012	0.255254	0.19144	0.75
pSyn_Nrg3deltaCt_pSyn_Gfp	DN550	1	17	7	38.21	0.44491	0.183198	0.411765
pSyn_Nrg3deltaCt_pSyn_Gfp	DN550	2	18	9	49.006	0.367302	0.183651	0.5
pSyn_Nrg3deltaCt_pSyn_Gfp	DN550	3	19	5	46	0.413043	0.108696	0.263158
pSyn_Nrg3deltaCt_pSyn_Gfp	DN550	4	25	17	45.408	0.550564	0.374383	0.68
pSyn_Nrg3deltaCt_pSyn_Gfp	DN550	5	10	9	33.628	0.297371	0.267634	0.9
pSyn_Nrg3deltaCt_pSyn_Gfp	DN550	6	19	7	44.427	0.427668	0.157562	0.368421
pSyn_Nrg3deltaCt_pSyn_Gfp	DN550	7	26	4	39.013	0.666445	0.10253	0.153846
pSyn_Nrg3deltaCt_pSyn_Gfp	DN550	8	23	15	49.007	0.469321	0.306079	0.652174
