# Supplementary material for: Subcellular sorting of neuregulins controls the assembly of excitatory-inhibitory cortical circuits
Source: eLife. 2020 Dec 15;9:e57000. doi: 10.7554/eLife.57000 (PMC7755390; doi:10.7554/eLife.57000)
Supplement: Figure 6—figure supplement 2—source data 1. [file elife-57000-fig6-figsupp2-data1.xlsx]

## Sheet: Sheet1
Plasmid	Brain	Cell	Count_vglut1_gfp	Count_ha_vglut_gfp	Perimeter_cell	Density_vglut1_gfp	Density_ha_vglut1_gfp	Proportion_ha_vglut1_gfp
pSyn_Nrg1_pSyn_Gfp	DN184	1	14	0	45.419	0.308241	0	0
pSyn_Nrg1_pSyn_Gfp	DN184	2	12	1	42.981	0.279193	0.0232661	0.0833333
pSyn_Nrg1_pSyn_Gfp	DN184	3	25	1	61.751	0.404852	0.0161941	0.04
pSyn_Nrg1_pSyn_Gfp	DN184	4	13	1	62.131	0.209235	0.016095	0.0769231
pSyn_Nrg1_pSyn_Gfp	DN184	5	16	1	47.616	0.336022	0.0210013	0.0625
pSyn_Nrg1_pSyn_Gfp	DN184	6	21	0	43.257	0.485471	0	0
pSyn_Nrg1_pSyn_Gfp	DN184	7	29	2	61.256	0.473423	0.0326499	0.0689655
pSyn_Nrg1_pSyn_Gfp	DN184	8	15	1	49.551	0.302718	0.0201812	0.0666667
pSyn_Nrg1_pSyn_Gfp	DN184	9	15	0	49.768	0.301398	0	0
pSyn_Nrg1_pSyn_Gfp	DN184	10	11	0	49.153	0.223791	0	0
pSyn_Nrg1_pSyn_Gfp	DN185	1	13	0	52.776	0.246324	0	0
pSyn_Nrg1_pSyn_Gfp	DN185	2	10	0	44.295	0.225759	0	0
pSyn_Nrg1_pSyn_Gfp	DN185	3	25	1	53.676	0.465758	0.0186303	0.04
pSyn_Nrg1_pSyn_Gfp	DN185	4	16	0	36.967	0.432818	0	0
pSyn_Nrg1_pSyn_Gfp	DN185	5	13	2	46.993	0.276637	0.0425595	0.153846
pSyn_Nrg1_pSyn_Gfp	DN185	6	15	0	51.297	0.292415	0	0
pSyn_Nrg1_pSyn_Gfp	DN185	7	9	0	45.281	0.198759	0	0
pSyn_Nrg1_pSyn_Gfp	DN185	8	33	2	65.967	0.50025	0.0303182	0.0606061
pSyn_Nrg1_pSyn_Gfp	DN185	9	16	0	53.142	0.30108	0	0
pSyn_Nrg1_pSyn_Gfp	DN185	10	34	1	54.595	0.622768	0.0183167	0.0294118
pSyn_Nrg1_pSyn_Gfp	DN186	1	30	0	54.171	0.553802	0	0
pSyn_Nrg1_pSyn_Gfp	DN186	2	8	0	58.714	0.136254	0	0
pSyn_Nrg1_pSyn_Gfp	DN186	3	22	2	53.231	0.413293	0.0375721	0.0909091
pSyn_Nrg1_pSyn_Gfp	DN186	4	17	0	50.85	0.334317	0	0
pSyn_Nrg1_pSyn_Gfp	DN186	5	29	1	55.149	0.525848	0.0181327	0.0344828
pSyn_Nrg1_pSyn_Gfp	DN186	6	20	4	56.326	0.355076	0.0710152	0.2
pSyn_Nrg1_pSyn_Gfp	DN186	7	19	2	56.435	0.336671	0.035439	0.105263
pSyn_Nrg1_pSyn_Gfp	DN186	8	18	0	58.256	0.308981	0	0
pSyn_Nrg1_pSyn_Gfp	DN186	9	17	0	56.745	0.299586	0	0
pSyn_Nrg1_pSyn_Gfp	DN186	10	24	3	60.875	0.394251	0.0492813	0.125
pSyn_Nrg1_pSyn_Gfp	DN190	1	15	0	50.707	0.295817	0	0
pSyn_Nrg1_pSyn_Gfp	DN190	2	14	1	55.644	0.251599	0.0179714	0.0714286
pSyn_Nrg1_pSyn_Gfp	DN190	3	16	1	46.362	0.34511	0.0215694	0.0625
pSyn_Nrg1_pSyn_Gfp	DN190	4	13	0	56.729	0.22916	0	0
pSyn_Nrg1_pSyn_Gfp	DN190	5	14	0	60.682	0.230711	0	0
pSyn_Nrg1_pSyn_Gfp	DN190	6	16	0	61.437	0.260429	0	0
pSyn_Nrg1_pSyn_Gfp	DN190	7	18	0	64.758	0.277958	0	0
pSyn_Nrg1_pSyn_Gfp	DN190	8	9	1	53.843	0.167153	0.0185725	0.111111
pSyn_Nrg1_pSyn_Gfp	DN190	9	20	2	51.71	0.386772	0.0386772	0.1
pSyn_Nrg1_pSyn_Gfp	DN190	10	16	0	41.989	0.381052	0	0
pSyn_Nrg3_pSyn_Gfp	DN194	1	23	12	52.972	0.434192	0.226535	0.521739
pSyn_Nrg3_pSyn_Gfp	DN194	2	19	11	56.787	0.334584	0.193706	0.578947
pSyn_Nrg3_pSyn_Gfp	DN194	3	16	13	48.039	0.333063	0.270613	0.8125
pSyn_Nrg3_pSyn_Gfp	DN194	4	19	10	53.792	0.353212	0.185901	0.526316
pSyn_Nrg3_pSyn_Gfp	DN194	5	25	15	45.755	0.546388	0.327833	0.6
pSyn_Nrg3_pSyn_Gfp	DN194	6	28	23	53.289	0.525437	0.431609	0.821429
pSyn_Nrg3_pSyn_Gfp	DN194	7	37	24	51.963	0.712045	0.461867	0.648649
pSyn_Nrg3_pSyn_Gfp	DN194	8	28	21	61.965	0.451868	0.338901	0.75
pSyn_Nrg3_pSyn_Gfp	DN194	9	32	31	63.788	0.501662	0.485985	0.96875
pSyn_Nrg3_pSyn_Gfp	DN194	10	26	21	54.661	0.475659	0.384186	0.807692
pSyn_Nrg3_pSyn_Gfp	DN194	11	10	7	42.983	0.23265	0.162855	0.7
pSyn_Nrg3_pSyn_Gfp	DN194	12	21	15	48.445	0.433481	0.309629	0.714286
pSyn_Nrg3_pSyn_Gfp	DN195	1	18	10	60.193	0.299038	0.166132	0.555556
pSyn_Nrg3_pSyn_Gfp	DN195	2	22	21	67.275	0.327016	0.312152	0.954545
pSyn_Nrg3_pSyn_Gfp	DN195	3	29	24	54.011	0.536928	0.444354	0.827586
pSyn_Nrg3_pSyn_Gfp	DN195	4	28	18	52.48	0.533537	0.342988	0.642857
pSyn_Nrg3_pSyn_Gfp	DN195	5	31	22	67.043	0.46239	0.328148	0.709677
pSyn_Nrg3_pSyn_Gfp	DN195	6	23	17	51.267	0.448632	0.331597	0.73913
pSyn_Nrg3_pSyn_Gfp	DN195	7	20	13	49.655	0.402779	0.261806	0.65
pSyn_Nrg3_pSyn_Gfp	DN195	8	20	11	44.582	0.448612	0.246736	0.55
pSyn_Nrg3_pSyn_Gfp	DN195	9	26	18	75.448	0.344608	0.238575	0.692308
pSyn_Nrg3_pSyn_Gfp	DN195	10	28	21	54.807	0.510884	0.383163	0.75
pSyn_Nrg3_pSyn_Gfp	DN195	11	25	13	62.115	0.402479	0.209289	0.52
pSyn_Nrg3_pSyn_Gfp	DN195	12	12	7	48.216	0.24888	0.14518	0.583333
pSyn_Nrg3_pSyn_Gfp	DN195	13	19	10	59.033	0.321854	0.169397	0.526316
pSyn_Nrg3_pSyn_Gfp	DN195	14	19	11	50.988	0.372637	0.215737	0.578947
pSyn_Nrg3_pSyn_Gfp	DN195	15	26	17	49.923	0.520802	0.340524	0.653846
pSyn_Nrg3_pSyn_Gfp	DN195	16	15	11	60.221	0.249083	0.182661	0.733333
pSyn_Nrg3_pSyn_Gfp	DN196	1	16	13	43.948	0.364067	0.295804	0.8125
pSyn_Nrg3_pSyn_Gfp	DN196	2	24	11	58.998	0.406793	0.186447	0.458333
pSyn_Nrg3_pSyn_Gfp	DN196	3	18	12	55.033	0.327076	0.218051	0.666667
pSyn_Nrg3_pSyn_Gfp	DN196	4	28	25	66.628	0.420244	0.375218	0.892857
pSyn_Nrg3_pSyn_Gfp	DN196	5	17	11	49.533	0.343206	0.222074	0.647059
pSyn_Nrg3_pSyn_Gfp	DN196	6	20	15	50.235	0.398129	0.298597	0.75
pSyn_Nrg3_pSyn_Gfp	DN196	7	18	14	50.797	0.354352	0.275607	0.777778
pSyn_Nrg3_pSyn_Gfp	DN196	8	20	13	55.067	0.363194	0.236076	0.65
pSyn_Nrg3_pSyn_Gfp	DN196	9	18	8	51.424	0.350031	0.155569	0.444444
pSyn_Nrg3_pSyn_Gfp	DN196	10	21	12	53.994	0.388932	0.222247	0.571429
pSyn_Nrg3_pSyn_Gfp	DN196	11	29	14	50.109	0.578738	0.279391	0.482759
pSyn_Nrg3_pSyn_Gfp	DN196	12	19	12	50.133	0.378992	0.239363	0.631579
pSyn_Nrg3_pSyn_Gfp	DN197	1	26	24	59.786	0.434884	0.401432	0.923077
pSyn_Nrg3_pSyn_Gfp	DN197	2	28	25	55.571	0.50386	0.449875	0.892857
pSyn_Nrg3_pSyn_Gfp	DN197	3	30	27	53.961	0.555957	0.500361	0.9
pSyn_Nrg3_pSyn_Gfp	DN197	4	46	22	66.887	0.687727	0.328913	0.478261
pSyn_Nrg3_pSyn_Gfp	DN197	5	23	15	62.517	0.3679	0.239935	0.652174
pSyn_Nrg3_pSyn_Gfp	DN197	6	16	12	51.39	0.311345	0.233508	0.75
pSyn_Nrg3_pSyn_Gfp	DN197	7	14	7	56.928	0.245925	0.122962	0.5
pSyn_Nrg3_pSyn_Gfp	DN197	8	21	20	50.251	0.417902	0.398002	0.952381
pSyn_Nrg3_pSyn_Gfp	DN197	9	15	8	63.911	0.234701	0.125174	0.533333
pSyn_Nrg3_pSyn_Gfp	DN197	10	17	11	46.962	0.361995	0.234232	0.647059
pSyn_Nrg1deltaCt_pSyn_Gfp	DN530	1	7	1	38.938	0.179773	0.0256819	0.142857
pSyn_Nrg1deltaCt_pSyn_Gfp	DN530	2	10	6	34.536	0.289553	0.173732	0.6
pSyn_Nrg1deltaCt_pSyn_Gfp	DN530	3	13	11	53.723	0.241982	0.204754	0.846154
pSyn_Nrg1deltaCt_pSyn_Gfp	DN530	4	15	12	52.444	0.286019	0.228815	0.8
pSyn_Nrg1deltaCt_pSyn_Gfp	DN530	5	13	5	56.903	0.228459	0.0878688	0.384615
pSyn_Nrg1deltaCt_pSyn_Gfp	DN530	6	39	29	58.002	0.672391	0.499983	0.74359
pSyn_Nrg1deltaCt_pSyn_Gfp	DN530	7	25	23	40.337	0.619778	0.570196	0.92
pSyn_Nrg1deltaCt_pSyn_Gfp	DN530	8	28	16	51.982	0.538648	0.307799	0.571429
pSyn_Nrg1deltaCt_pSyn_Gfp	DN530	9	21	16	57.069	0.367976	0.280362	0.761905
pSyn_Nrg1deltaCt_pSyn_Gfp	DN530	10	18	7	39.586	0.454706	0.17683	0.388889
pSyn_Nrg1deltaCt_pSyn_Gfp	DN531	1	26	26	51.116	0.508647	0.508647	1
pSyn_Nrg1deltaCt_pSyn_Gfp	DN531	2	17	10	48.101	0.353423	0.207896	0.588235
pSyn_Nrg1deltaCt_pSyn_Gfp	DN531	3	22	12	53.122	0.414141	0.225895	0.545455
pSyn_Nrg1deltaCt_pSyn_Gfp	DN531	4	24	20	57.25	0.419214	0.349345	0.833333
pSyn_Nrg1deltaCt_pSyn_Gfp	DN531	5	18	16	49.853	0.361062	0.320944	0.888889
pSyn_Nrg1deltaCt_pSyn_Gfp	DN531	6	14	4	44.356	0.315628	0.0901795	0.285714
pSyn_Nrg1deltaCt_pSyn_Gfp	DN531	7	22	12	57.258	0.384226	0.209578	0.545455
pSyn_Nrg1deltaCt_pSyn_Gfp	DN531	8	12	6	53.99	0.222263	0.111132	0.5
pSyn_Nrg1deltaCt_pSyn_Gfp	DN542	1	20	13	43.279	0.462118	0.300377	0.65
pSyn_Nrg1deltaCt_pSyn_Gfp	DN542	2	20	15	52.883	0.378193	0.283645	0.75
pSyn_Nrg1deltaCt_pSyn_Gfp	DN542	3	16	11	41.945	0.381452	0.262248	0.6875
pSyn_Nrg1deltaCt_pSyn_Gfp	DN542	4	23	9	61.46	0.374227	0.146437	0.391304
pSyn_Nrg1deltaCt_pSyn_Gfp	DN542	5	23	19	47.368	0.48556	0.401115	0.826087
pSyn_Nrg1deltaCt_pSyn_Gfp	DN542	6	13	7	43.248	0.300592	0.161857	0.538462
pSyn_Nrg1deltaCt_pSyn_Gfp	DN542	7	15	14	52.541	0.285491	0.266459	0.933333
pSyn_Nrg1deltaCt_pSyn_Gfp	DN542	8	17	8	49.931	0.34047	0.160221	0.470588
pSyn_Nrg1deltaCt_pSyn_Gfp	DN543	1	20	16	54.954	0.363941	0.291153	0.8
pSyn_Nrg1deltaCt_pSyn_Gfp	DN543	2	17	14	51.19	0.332096	0.273491	0.823529
pSyn_Nrg1deltaCt_pSyn_Gfp	DN543	3	14	9	52.855	0.264876	0.170277	0.642857
pSyn_Nrg1deltaCt_pSyn_Gfp	DN543	4	33	22	54.338	0.60731	0.404873	0.666667
pSyn_Nrg1deltaCt_pSyn_Gfp	DN543	5	26	19	46.958	0.553686	0.404617	0.730769
pSyn_Nrg1deltaCt_pSyn_Gfp	DN543	6	19	13	48.153	0.394576	0.269973	0.684211
pSyn_Nrg1deltaCt_pSyn_Gfp	DN543	7	16	10	53.228	0.300594	0.187871	0.625
pSyn_Nrg1deltaCt_pSyn_Gfp	DN543	8	29	20	63.478	0.456851	0.31507	0.689655
pSyn_Nrg1deltaCt_pSyn_Gfp	DN544	1	21	14	64.083	0.3277	0.218467	0.666667
pSyn_Nrg1deltaCt_pSyn_Gfp	DN544	2	18	11	53.365	0.3373	0.206128	0.611111
pSyn_Nrg1deltaCt_pSyn_Gfp	DN544	3	26	17	51.834	0.501601	0.32797	0.653846
pSyn_Nrg1deltaCt_pSyn_Gfp	DN544	4	18	12	50.119	0.359145	0.23943	0.666667
pSyn_Nrg3deltaCt_pSyn_Gfp	DN536	1	13	8	53.805	0.241613	0.148685	0.615385
pSyn_Nrg3deltaCt_pSyn_Gfp	DN536	2	21	14	48.693	0.431273	0.287516	0.666667
pSyn_Nrg3deltaCt_pSyn_Gfp	DN536	3	28	18	66.186	0.42305	0.271961	0.642857
pSyn_Nrg3deltaCt_pSyn_Gfp	DN536	4	34	28	63.536	0.53513	0.440695	0.823529
pSyn_Nrg3deltaCt_pSyn_Gfp	DN536	5	25	18	44.885	0.556979	0.401025	0.72
pSyn_Nrg3deltaCt_pSyn_Gfp	DN536	6	18	13	58.625	0.307036	0.221748	0.722222
pSyn_Nrg3deltaCt_pSyn_Gfp	DN536	7	14	12	36.338	0.385272	0.330233	0.857143
pSyn_Nrg3deltaCt_pSyn_Gfp	DN536	8	9	3	55.953	0.160849	0.0536164	0.333333
pSyn_Nrg3deltaCt_pSyn_Gfp	DN545	1	24	23	55.182	0.434924	0.416803	0.958333
pSyn_Nrg3deltaCt_pSyn_Gfp	DN545	2	29	21	62.516	0.463881	0.335914	0.724138
pSyn_Nrg3deltaCt_pSyn_Gfp	DN545	3	17	12	48.869	0.347869	0.245554	0.705882
pSyn_Nrg3deltaCt_pSyn_Gfp	DN545	4	29	18	67.097	0.43221	0.268268	0.62069
pSyn_Nrg3deltaCt_pSyn_Gfp	DN545	5	27	21	61.902	0.436173	0.339246	0.777778
pSyn_Nrg3deltaCt_pSyn_Gfp	DN545	6	18	15	49.454	0.363975	0.303312	0.833333
pSyn_Nrg3deltaCt_pSyn_Gfp	DN545	7	20	15	54.315	0.368222	0.276167	0.75
pSyn_Nrg3deltaCt_pSyn_Gfp	DN545	8	31	22	53.519	0.579234	0.411069	0.709677
pSyn_Nrg3deltaCt_pSyn_Gfp	DN545	9	31	18	66.549	0.465822	0.270477	0.580645
pSyn_Nrg3deltaCt_pSyn_Gfp	DN545	10	13	9	66.113	0.196633	0.136131	0.692308
pSyn_Nrg3deltaCt_pSyn_Gfp	DN548	1	28	17	55.353	0.505844	0.30712	0.607143
pSyn_Nrg3deltaCt_pSyn_Gfp	DN548	2	19	9	53.4	0.355805	0.168539	0.473684
pSyn_Nrg3deltaCt_pSyn_Gfp	DN548	3	18	15	43.368	0.415053	0.345877	0.833333
pSyn_Nrg3deltaCt_pSyn_Gfp	DN548	4	11	5	32.384	0.339674	0.154397	0.454545
pSyn_Nrg3deltaCt_pSyn_Gfp	DN548	5	7	4	38.177	0.183356	0.104775	0.571429
pSyn_Nrg3deltaCt_pSyn_Gfp	DN548	6	25	14	49.982	0.50018	0.280101	0.56
pSyn_Nrg3deltaCt_pSyn_Gfp	DN548	7	22	16	53.832	0.408679	0.297221	0.727273
pSyn_Nrg3deltaCt_pSyn_Gfp	DN548	8	21	16	52.469	0.400236	0.304942	0.761905
pSyn_Nrg3deltaCt_pSyn_Gfp	DN549	1	19	18	45.077	0.421501	0.399317	0.947368
pSyn_Nrg3deltaCt_pSyn_Gfp	DN549	2	34	31	47.544	0.715127	0.652028	0.911765
pSyn_Nrg3deltaCt_pSyn_Gfp	DN549	3	26	16	67.971	0.382516	0.235395	0.615385
pSyn_Nrg3deltaCt_pSyn_Gfp	DN549	4	20	18	52.395	0.381716	0.343544	0.9
pSyn_Nrg3deltaCt_pSyn_Gfp	DN549	5	27	20	61.766	0.437134	0.323803	0.740741
pSyn_Nrg3deltaCt_pSyn_Gfp	DN549	6	19	11	43.969	0.432123	0.250176	0.578947
pSyn_Nrg3deltaCt_pSyn_Gfp	DN550	1	21	13	46.866	0.448086	0.277387	0.619048
pSyn_Nrg3deltaCt_pSyn_Gfp	DN550	2	14	11	54.63	0.256269	0.201355	0.785714
pSyn_Nrg3deltaCt_pSyn_Gfp	DN550	3	21	15	57.926	0.362532	0.258951	0.714286
pSyn_Nrg3deltaCt_pSyn_Gfp	DN550	4	18	12	47.592	0.378215	0.252143	0.666667
