# Supplementary material for: Subcellular sorting of neuregulins controls the assembly of excitatory-inhibitory cortical circuits
Source: eLife. 2020 Dec 15;9:e57000. doi: 10.7554/eLife.57000 (PMC7755390; doi:10.7554/eLife.57000)
Supplement: Figure 6—source data 1. [file elife-57000-fig6-data1.xlsx]

## Sheet: Colocalization_soma
Plasmid	Brain	ROI	Count_HA_GFP_cells	Proportion_HA_GFP_cells
pSyn_Nrg1deltaCt_pSyn_Gfp	DN529	1	6	0.162162
pSyn_Nrg1deltaCt_pSyn_Gfp	DN529	2	5	0.142857
pSyn_Nrg1deltaCt_pSyn_Gfp	DN529	3	3	0.1
pSyn_Nrg1deltaCt_pSyn_Gfp	DN529	4	2	0.0833333
pSyn_Nrg1deltaCt_pSyn_Gfp	DN529	5	3	0.0909091
pSyn_Nrg1deltaCt_pSyn_Gfp	DN529	6	5	0.151515
pSyn_Nrg1deltaCt_pSyn_Gfp	DN529	7	1	0.037037
pSyn_Nrg1deltaCt_pSyn_Gfp	DN529	8	6	0.25
pSyn_Nrg1deltaCt_pSyn_Gfp	DN529	9	5	0.172414
pSyn_Nrg1deltaCt_pSyn_Gfp	DN529	10	1	0.030303
pSyn_Nrg1deltaCt_pSyn_Gfp	DN529	11	2	0.0689655
pSyn_Nrg1deltaCt_pSyn_Gfp	DN530	1	2	0.0740741
pSyn_Nrg1deltaCt_pSyn_Gfp	DN530	2	3	0.103448
pSyn_Nrg1deltaCt_pSyn_Gfp	DN530	3	3	0.115385
pSyn_Nrg1deltaCt_pSyn_Gfp	DN530	4	0	0
pSyn_Nrg1deltaCt_pSyn_Gfp	DN530	5	7	0.291667
pSyn_Nrg1deltaCt_pSyn_Gfp	DN530	6	6	0.171429
pSyn_Nrg1deltaCt_pSyn_Gfp	DN530	7	2	0.0540541
pSyn_Nrg1deltaCt_pSyn_Gfp	DN530	8	5	0.147059
pSyn_Nrg1deltaCt_pSyn_Gfp	DN530	9	6	0.171429
pSyn_Nrg1deltaCt_pSyn_Gfp	DN530	10	3	0.111111
pSyn_Nrg1deltaCt_pSyn_Gfp	DN530	11	4	0.173913
pSyn_Nrg1deltaCt_pSyn_Gfp	DN540	1	9	0.333333
pSyn_Nrg1deltaCt_pSyn_Gfp	DN540	2	3	0.111111
pSyn_Nrg1deltaCt_pSyn_Gfp	DN540	3	5	0.166667
pSyn_Nrg1deltaCt_pSyn_Gfp	DN540	4	10	0.344828
pSyn_Nrg1deltaCt_pSyn_Gfp	DN540	5	5	0.178571
pSyn_Nrg1deltaCt_pSyn_Gfp	DN540	6	5	0.16129
pSyn_Nrg1deltaCt_pSyn_Gfp	DN540	7	2	0.0909091
pSyn_Nrg1deltaCt_pSyn_Gfp	DN540	8	5	0.217391
pSyn_Nrg1deltaCt_pSyn_Gfp	DN540	9	4	0.133333
pSyn_Nrg1deltaCt_pSyn_Gfp	DN540	10	4	0.129032
pSyn_Nrg1deltaCt_pSyn_Gfp	DN540	11	4	0.129032
pSyn_Nrg1deltaCt_pSyn_Gfp	DN542	1	2	0.0645161
pSyn_Nrg1deltaCt_pSyn_Gfp	DN542	2	5	0.185185
pSyn_Nrg1deltaCt_pSyn_Gfp	DN542	3	4	0.142857
pSyn_Nrg1deltaCt_pSyn_Gfp	DN542	4	4	0.137931
pSyn_Nrg1deltaCt_pSyn_Gfp	DN542	5	7	0.259259
pSyn_Nrg1deltaCt_pSyn_Gfp	DN542	6	5	0.185185
pSyn_Nrg1deltaCt_pSyn_Gfp	DN542	7	4	0.166667
pSyn_Nrg1deltaCt_pSyn_Gfp	DN542	8	5	0.151515
pSyn_Nrg1deltaCt_pSyn_Gfp	DN542	9	5	0.178571
pSyn_Nrg1deltaCt_pSyn_Gfp	DN542	10	1	0.0344828
pSyn_Nrg1deltaCt_pSyn_Gfp	DN542	11	0	0
pSyn_Nrg1deltaCt_pSyn_Gfp	DN543	1	2	0.0645161
pSyn_Nrg1deltaCt_pSyn_Gfp	DN543	2	1	0.04
pSyn_Nrg1deltaCt_pSyn_Gfp	DN543	3	3	0.15
pSyn_Nrg1deltaCt_pSyn_Gfp	DN543	4	4	0.166667
pSyn_Nrg1deltaCt_pSyn_Gfp	DN543	5	6	0.214286
pSyn_Nrg1deltaCt_pSyn_Gfp	DN543	6	3	0.125
pSyn_Nrg1deltaCt_pSyn_Gfp	DN543	7	5	0.208333
pSyn_Nrg1deltaCt_pSyn_Gfp	DN543	8	3	0.111111
pSyn_Nrg1deltaCt_pSyn_Gfp	DN543	9	2	0.125
pSyn_Nrg1deltaCt_pSyn_Gfp	DN543	10	5	0.263158
pSyn_Nrg1deltaCt_pSyn_Gfp	DN543	11	6	0.4
pSyn_Nrg1deltaCt_pSyn_Gfp	DN544	1	2	0.0769231
pSyn_Nrg1deltaCt_pSyn_Gfp	DN544	2	3	0.111111
pSyn_Nrg1deltaCt_pSyn_Gfp	DN544	3	1	0.0454545
pSyn_Nrg1deltaCt_pSyn_Gfp	DN544	4	4	0.307692
pSyn_Nrg1deltaCt_pSyn_Gfp	DN544	5	9	0.428571
pSyn_Nrg1deltaCt_pSyn_Gfp	DN544	6	3	0.125
pSyn_Nrg1deltaCt_pSyn_Gfp	DN544	7	1	0.030303
pSyn_Nrg1deltaCt_pSyn_Gfp	DN544	8	1	0.037037
pSyn_Nrg1deltaCt_pSyn_Gfp	DN544	9	5	0.208333
pSyn_Nrg1deltaCt_pSyn_Gfp	DN544	10	2	0.0869565
pSyn_Nrg1deltaCt_pSyn_Gfp	DN544	11	4	0.148148
pSyn_Nrg3deltaCt_pSyn_Gfp	DN535	1	2	0.0740741
pSyn_Nrg3deltaCt_pSyn_Gfp	DN535	2	5	0.147059
pSyn_Nrg3deltaCt_pSyn_Gfp	DN535	3	4	0.16
pSyn_Nrg3deltaCt_pSyn_Gfp	DN535	4	3	0.142857
pSyn_Nrg3deltaCt_pSyn_Gfp	DN535	5	0	0
pSyn_Nrg3deltaCt_pSyn_Gfp	DN535	6	3	0.1
pSyn_Nrg3deltaCt_pSyn_Gfp	DN535	7	5	0.2
pSyn_Nrg3deltaCt_pSyn_Gfp	DN535	8	3	0.166667
pSyn_Nrg3deltaCt_pSyn_Gfp	DN535	9	5	0.185185
pSyn_Nrg3deltaCt_pSyn_Gfp	DN535	10	1	0.037037
pSyn_Nrg3deltaCt_pSyn_Gfp	DN535	11	2	0.117647
pSyn_Nrg3deltaCt_pSyn_Gfp	DN536	1	0	0
pSyn_Nrg3deltaCt_pSyn_Gfp	DN536	2	7	0.233333
pSyn_Nrg3deltaCt_pSyn_Gfp	DN536	3	4	0.181818
pSyn_Nrg3deltaCt_pSyn_Gfp	DN536	4	6	0.176471
pSyn_Nrg3deltaCt_pSyn_Gfp	DN536	5	3	0.125
pSyn_Nrg3deltaCt_pSyn_Gfp	DN536	6	6	0.1875
pSyn_Nrg3deltaCt_pSyn_Gfp	DN536	7	4	0.125
pSyn_Nrg3deltaCt_pSyn_Gfp	DN536	8	2	0.0952381
pSyn_Nrg3deltaCt_pSyn_Gfp	DN536	9	2	0.0645161
pSyn_Nrg3deltaCt_pSyn_Gfp	DN536	10	3	0.103448
pSyn_Nrg3deltaCt_pSyn_Gfp	DN536	11	3	0.115385
pSyn_Nrg3deltaCt_pSyn_Gfp	DN545	1	5	0.142857
pSyn_Nrg3deltaCt_pSyn_Gfp	DN545	2	3	0.09375
pSyn_Nrg3deltaCt_pSyn_Gfp	DN545	3	3	0.1
pSyn_Nrg3deltaCt_pSyn_Gfp	DN545	4	0	0
pSyn_Nrg3deltaCt_pSyn_Gfp	DN545	5	0	0
pSyn_Nrg3deltaCt_pSyn_Gfp	DN545	6	1	0.04
pSyn_Nrg3deltaCt_pSyn_Gfp	DN545	7	2	0.0666667
pSyn_Nrg3deltaCt_pSyn_Gfp	DN545	8	4	0.181818
pSyn_Nrg3deltaCt_pSyn_Gfp	DN545	9	0	0
pSyn_Nrg3deltaCt_pSyn_Gfp	DN545	10	3	0.103448
pSyn_Nrg3deltaCt_pSyn_Gfp	DN545	11	4	0.153846
pSyn_Nrg3deltaCt_pSyn_Gfp	DN546	1	6	0.25
pSyn_Nrg3deltaCt_pSyn_Gfp	DN546	2	2	0.0606061
pSyn_Nrg3deltaCt_pSyn_Gfp	DN546	3	3	0.0857143
pSyn_Nrg3deltaCt_pSyn_Gfp	DN546	4	4	0.125
pSyn_Nrg3deltaCt_pSyn_Gfp	DN546	5	0	0
pSyn_Nrg3deltaCt_pSyn_Gfp	DN546	6	3	0.0789474
pSyn_Nrg3deltaCt_pSyn_Gfp	DN546	7	2	0.0689655
pSyn_Nrg3deltaCt_pSyn_Gfp	DN546	8	3	0.1
pSyn_Nrg3deltaCt_pSyn_Gfp	DN546	9	5	0.217391
pSyn_Nrg3deltaCt_pSyn_Gfp	DN546	10	5	0.178571
pSyn_Nrg3deltaCt_pSyn_Gfp	DN546	11	8	0.275862
pSyn_Nrg3deltaCt_pSyn_Gfp	DN548	1	9	0.272727
pSyn_Nrg3deltaCt_pSyn_Gfp	DN548	2	3	0.15
pSyn_Nrg3deltaCt_pSyn_Gfp	DN548	3	4	0.137931
pSyn_Nrg3deltaCt_pSyn_Gfp	DN548	4	4	0.129032
pSyn_Nrg3deltaCt_pSyn_Gfp	DN548	5	5	0.166667
pSyn_Nrg3deltaCt_pSyn_Gfp	DN548	6	2	0.0588235
pSyn_Nrg3deltaCt_pSyn_Gfp	DN548	7	1	0.0357143
pSyn_Nrg3deltaCt_pSyn_Gfp	DN548	8	3	0.111111
pSyn_Nrg3deltaCt_pSyn_Gfp	DN548	9	5	0.16129
pSyn_Nrg3deltaCt_pSyn_Gfp	DN548	10	4	0.153846
pSyn_Nrg3deltaCt_pSyn_Gfp	DN548	11	1	0.0357143
pSyn_Nrg3deltaCt_pSyn_Gfp	DN549	1	4	0.173913
pSyn_Nrg3deltaCt_pSyn_Gfp	DN549	2	1	0.04
pSyn_Nrg3deltaCt_pSyn_Gfp	DN549	3	2	0.0869565
pSyn_Nrg3deltaCt_pSyn_Gfp	DN549	4	5	0.2
pSyn_Nrg3deltaCt_pSyn_Gfp	DN549	5	0	0
pSyn_Nrg3deltaCt_pSyn_Gfp	DN549	6	1	0.05
pSyn_Nrg3deltaCt_pSyn_Gfp	DN549	7	4	0.210526
pSyn_Nrg3deltaCt_pSyn_Gfp	DN549	8	2	0.117647
pSyn_Nrg3deltaCt_pSyn_Gfp	DN549	9	1	0.0454545
pSyn_Nrg3deltaCt_pSyn_Gfp	DN549	10	6	0.272727
pSyn_Nrg3deltaCt_pSyn_Gfp	DN549	11	5	0.277778

## Sheet: Colocalization_neuropil
Plasmid	Brain	ROI	Area_colocalization	Area_GFP	Area_HA	Proportion_colocalization
pSyn_Nrg1deltaCt_pSyn_Gfp	DN529	1	0.187971	0.437886	0.224927	0.42927
pSyn_Nrg1deltaCt_pSyn_Gfp	DN529	2	0.205887	0.452458	0.249395	0.45504
pSyn_Nrg1deltaCt_pSyn_Gfp	DN529	3	0.207757	0.453729	0.249258	0.457889
pSyn_Nrg1deltaCt_pSyn_Gfp	DN529	4	0.202827	0.427108	0.261023	0.474885
pSyn_Nrg1deltaCt_pSyn_Gfp	DN529	5	0.185232	0.503023	0.209773	0.368237
pSyn_Nrg1deltaCt_pSyn_Gfp	DN529	6	0.211274	0.578291	0.231283	0.365342
pSyn_Nrg1deltaCt_pSyn_Gfp	DN529	7	0.213164	0.559282	0.238878	0.381139
pSyn_Nrg1deltaCt_pSyn_Gfp	DN529	8	0.18465	0.493353	0.211086	0.374276
pSyn_Nrg1deltaCt_pSyn_Gfp	DN529	9	0.229161	0.600403	0.252092	0.381678
pSyn_Nrg1deltaCt_pSyn_Gfp	DN530	1	0.221179	0.470685	0.263287	0.469908
pSyn_Nrg1deltaCt_pSyn_Gfp	DN530	2	0.252501	0.620093	0.272411	0.407199
pSyn_Nrg1deltaCt_pSyn_Gfp	DN530	3	0.202082	0.413653	0.272557	0.488531
pSyn_Nrg1deltaCt_pSyn_Gfp	DN530	4	0.212993	0.452117	0.27651	0.471101
pSyn_Nrg1deltaCt_pSyn_Gfp	DN530	5	0.194256	0.504975	0.228518	0.384685
pSyn_Nrg1deltaCt_pSyn_Gfp	DN530	6	0.176351	0.425025	0.227747	0.414919
pSyn_Nrg1deltaCt_pSyn_Gfp	DN530	7	0.18597	0.428483	0.235022	0.434019
pSyn_Nrg1deltaCt_pSyn_Gfp	DN530	8	0.178581	0.431084	0.226952	0.41426
pSyn_Nrg1deltaCt_pSyn_Gfp	DN530	9	0.194168	0.467033	0.231614	0.415748
pSyn_Nrg1deltaCt_pSyn_Gfp	DN540	1	0.1953	0.557174	0.215046	0.35052
pSyn_Nrg1deltaCt_pSyn_Gfp	DN540	2	0.189248	0.413284	0.237499	0.457914
pSyn_Nrg1deltaCt_pSyn_Gfp	DN540	3	0.206014	0.467899	0.242332	0.440295
pSyn_Nrg1deltaCt_pSyn_Gfp	DN540	4	0.156456	0.439893	0.190577	0.355669
pSyn_Nrg1deltaCt_pSyn_Gfp	DN540	5	0.190241	0.558702	0.207621	0.340504
pSyn_Nrg1deltaCt_pSyn_Gfp	DN540	6	0.191475	0.467068	0.226911	0.409951
pSyn_Nrg1deltaCt_pSyn_Gfp	DN540	7	0.182884	0.433733	0.213703	0.42165
pSyn_Nrg1deltaCt_pSyn_Gfp	DN540	8	0.204336	0.531659	0.231592	0.384336
pSyn_Nrg1deltaCt_pSyn_Gfp	DN542	1	0.240147	0.41253	0.314471	0.582133
pSyn_Nrg1deltaCt_pSyn_Gfp	DN542	2	0.29309	0.59314	0.321406	0.494133
pSyn_Nrg1deltaCt_pSyn_Gfp	DN542	3	0.252099	0.555389	0.286319	0.453914
pSyn_Nrg1deltaCt_pSyn_Gfp	DN542	4	0.228437	0.531224	0.262026	0.43002
pSyn_Nrg1deltaCt_pSyn_Gfp	DN542	5	0.218391	0.527894	0.242699	0.413702
pSyn_Nrg1deltaCt_pSyn_Gfp	DN542	6	0.195446	0.438067	0.241209	0.446155
pSyn_Nrg1deltaCt_pSyn_Gfp	DN542	7	0.211897	0.498179	0.24474	0.425343
pSyn_Nrg1deltaCt_pSyn_Gfp	DN542	8	0.200302	0.449997	0.23423	0.445118
pSyn_Nrg1deltaCt_pSyn_Gfp	DN542	9	0.231942	0.524112	0.266168	0.442542
pSyn_Nrg1deltaCt_pSyn_Gfp	DN542	10	0.253902	0.572085	0.279162	0.443818
pSyn_Nrg1deltaCt_pSyn_Gfp	DN543	1	0.214594	0.440621	0.239038	0.487027
pSyn_Nrg1deltaCt_pSyn_Gfp	DN543	2	0.235753	0.471442	0.273507	0.500068
pSyn_Nrg1deltaCt_pSyn_Gfp	DN543	3	0.21735	0.482131	0.265082	0.450811
pSyn_Nrg1deltaCt_pSyn_Gfp	DN543	4	0.206349	0.48027	0.22967	0.429652
pSyn_Nrg1deltaCt_pSyn_Gfp	DN543	5	0.208866	0.457844	0.24723	0.456194
pSyn_Nrg1deltaCt_pSyn_Gfp	DN543	6	0.184167	0.445677	0.249017	0.41323
pSyn_Nrg1deltaCt_pSyn_Gfp	DN543	7	0.214342	0.499997	0.252783	0.428687
pSyn_Nrg1deltaCt_pSyn_Gfp	DN543	8	0.237007	0.554211	0.258083	0.427647
pSyn_Nrg1deltaCt_pSyn_Gfp	DN543	9	0.196735	0.496264	0.219791	0.396432
pSyn_Nrg1deltaCt_pSyn_Gfp	DN543	10	0.227643	0.520292	0.266804	0.437529
pSyn_Nrg1deltaCt_pSyn_Gfp	DN543	11	0.191195	0.462449	0.221587	0.41344
pSyn_Nrg1deltaCt_pSyn_Gfp	DN544	1	0.212763	0.48228	0.244916	0.441161
pSyn_Nrg1deltaCt_pSyn_Gfp	DN544	2	0.258089	0.528631	0.301663	0.488222
pSyn_Nrg1deltaCt_pSyn_Gfp	DN544	3	0.256356	0.52991	0.299529	0.483773
pSyn_Nrg1deltaCt_pSyn_Gfp	DN544	4	0.25102	0.483166	0.31395	0.519532
pSyn_Nrg1deltaCt_pSyn_Gfp	DN544	5	0.233155	0.452728	0.290868	0.514999
pSyn_Nrg1deltaCt_pSyn_Gfp	DN544	6	0.226583	0.56391	0.257247	0.401806
pSyn_Nrg1deltaCt_pSyn_Gfp	DN544	7	0.251135	0.532894	0.301064	0.471266
pSyn_Nrg1deltaCt_pSyn_Gfp	DN544	8	0.242934	0.558804	0.268592	0.43474
pSyn_Nrg1deltaCt_pSyn_Gfp	DN544	9	0.238058	0.579606	0.263005	0.410724
pSyn_Nrg1deltaCt_pSyn_Gfp	DN544	10	0.22913	0.483174	0.276057	0.474219
pSyn_Nrg1deltaCt_pSyn_Gfp	DN544	11	0.238058	0.579606	0.263005	0.410724
pSyn_Nrg3deltaCt_pSyn_Gfp	DN535	1	0.140268	0.299895	0.219225	0.467723
pSyn_Nrg3deltaCt_pSyn_Gfp	DN535	2	0.143205	0.288825	0.219561	0.495819
pSyn_Nrg3deltaCt_pSyn_Gfp	DN535	3	0.161349	0.360327	0.214167	0.447784
pSyn_Nrg3deltaCt_pSyn_Gfp	DN535	4	0.149133	0.427097	0.176512	0.349178
pSyn_Nrg3deltaCt_pSyn_Gfp	DN535	5	0.0906523	0.261244	0.144565	0.347003
pSyn_Nrg3deltaCt_pSyn_Gfp	DN535	6	0.120139	0.285619	0.175356	0.420624
pSyn_Nrg3deltaCt_pSyn_Gfp	DN535	7	0.123524	0.276831	0.189101	0.446206
pSyn_Nrg3deltaCt_pSyn_Gfp	DN535	8	0.107367	0.263307	0.164037	0.407765
pSyn_Nrg3deltaCt_pSyn_Gfp	DN535	9	0.120139	0.347493	0.160572	0.345732
pSyn_Nrg3deltaCt_pSyn_Gfp	DN536	1	0.204889	0.512754	0.2387	0.399585
pSyn_Nrg3deltaCt_pSyn_Gfp	DN536	2	0.181149	0.372993	0.251399	0.485665
pSyn_Nrg3deltaCt_pSyn_Gfp	DN536	3	0.195367	0.393804	0.271475	0.496103
pSyn_Nrg3deltaCt_pSyn_Gfp	DN536	4	0.175619	0.330347	0.27132	0.53162
pSyn_Nrg3deltaCt_pSyn_Gfp	DN536	5	0.161816	0.397071	0.212271	0.407524
pSyn_Nrg3deltaCt_pSyn_Gfp	DN536	6	0.154945	0.331063	0.227608	0.468021
pSyn_Nrg3deltaCt_pSyn_Gfp	DN536	7	0.143833	0.30417	0.210013	0.47287
pSyn_Nrg3deltaCt_pSyn_Gfp	DN536	8	0.173153	0.357388	0.236283	0.484497
pSyn_Nrg3deltaCt_pSyn_Gfp	DN536	9	0.174917	0.366941	0.24495	0.476689
pSyn_Nrg3deltaCt_pSyn_Gfp	DN536	10	0.163556	0.345375	0.237232	0.473561
pSyn_Nrg3deltaCt_pSyn_Gfp	DN545	1	0.165969	0.346218	0.231314	0.479377
pSyn_Nrg3deltaCt_pSyn_Gfp	DN545	2	0.181165	0.382327	0.259935	0.473849
pSyn_Nrg3deltaCt_pSyn_Gfp	DN545	3	0.172142	0.39187	0.2594	0.439282
pSyn_Nrg3deltaCt_pSyn_Gfp	DN545	4	0.166554	0.361219	0.256174	0.461088
pSyn_Nrg3deltaCt_pSyn_Gfp	DN545	5	0.158511	0.339758	0.2391	0.466542
pSyn_Nrg3deltaCt_pSyn_Gfp	DN545	6	0.152865	0.340083	0.224391	0.449492
pSyn_Nrg3deltaCt_pSyn_Gfp	DN545	7	0.157056	0.334974	0.213597	0.468861
pSyn_Nrg3deltaCt_pSyn_Gfp	DN545	8	0.185892	0.498046	0.214102	0.373242
pSyn_Nrg3deltaCt_pSyn_Gfp	DN545	9	0.170294	0.400272	0.222134	0.425445
pSyn_Nrg3deltaCt_pSyn_Gfp	DN546	1	0.128476	0.30453	0.208211	0.421882
pSyn_Nrg3deltaCt_pSyn_Gfp	DN546	2	0.168325	0.384911	0.226052	0.43731
pSyn_Nrg3deltaCt_pSyn_Gfp	DN546	3	0.163687	0.382159	0.218621	0.428321
pSyn_Nrg3deltaCt_pSyn_Gfp	DN546	4	0.162768	0.370607	0.220022	0.439193
pSyn_Nrg3deltaCt_pSyn_Gfp	DN546	5	0.133989	0.364116	0.167533	0.367985
pSyn_Nrg3deltaCt_pSyn_Gfp	DN546	6	0.135258	0.322796	0.204614	0.41902
pSyn_Nrg3deltaCt_pSyn_Gfp	DN546	7	0.172739	0.45364	0.207051	0.380785
pSyn_Nrg3deltaCt_pSyn_Gfp	DN546	8	0.128118	0.352703	0.171439	0.363245
pSyn_Nrg3deltaCt_pSyn_Gfp	DN548	1	0.141073	0.319361	0.196478	0.441736
pSyn_Nrg3deltaCt_pSyn_Gfp	DN548	2	0.154062	0.356505	0.207637	0.432144
pSyn_Nrg3deltaCt_pSyn_Gfp	DN548	3	0.175851	0.397827	0.220178	0.442027
pSyn_Nrg3deltaCt_pSyn_Gfp	DN548	4	0.201782	0.432588	0.260697	0.466452
pSyn_Nrg3deltaCt_pSyn_Gfp	DN548	5	0.205523	0.419378	0.264902	0.490067
pSyn_Nrg3deltaCt_pSyn_Gfp	DN548	6	0.217982	0.447594	0.25601	0.487008
pSyn_Nrg3deltaCt_pSyn_Gfp	DN548	7	0.134813	0.306843	0.189919	0.439354
pSyn_Nrg3deltaCt_pSyn_Gfp	DN548	8	0.165166	0.374886	0.225541	0.440578
pSyn_Nrg3deltaCt_pSyn_Gfp	DN548	9	0.187288	0.364492	0.252776	0.513832
pSyn_Nrg3deltaCt_pSyn_Gfp	DN548	10	0.171743	0.319978	0.227432	0.536733
pSyn_Nrg3deltaCt_pSyn_Gfp	DN548	11	0.197621	0.425107	0.235612	0.464874
pSyn_Nrg3deltaCt_pSyn_Gfp	DN548	12	0.176941	0.348315	0.217703	0.507991
pSyn_Nrg3deltaCt_pSyn_Gfp	DN549	1	0.175225	0.396689	0.234518	0.441718
pSyn_Nrg3deltaCt_pSyn_Gfp	DN549	2	0.173428	0.341301	0.248519	0.508137
pSyn_Nrg3deltaCt_pSyn_Gfp	DN549	3	0.182631	0.365118	0.243771	0.500196
pSyn_Nrg3deltaCt_pSyn_Gfp	DN549	4	0.183196	0.401464	0.212982	0.45632
pSyn_Nrg3deltaCt_pSyn_Gfp	DN549	5	0.136434	0.328832	0.199814	0.414905
pSyn_Nrg3deltaCt_pSyn_Gfp	DN549	6	0.18135	0.4389	0.21998	0.413193
pSyn_Nrg3deltaCt_pSyn_Gfp	DN549	7	0.180927	0.430281	0.214059	0.420485
pSyn_Nrg3deltaCt_pSyn_Gfp	DN549	8	0.161809	0.375682	0.191383	0.430708
pSyn_Nrg3deltaCt_pSyn_Gfp	DN549	9	0.157197	0.445392	0.182768	0.352941
pSyn_Nrg3deltaCt_pSyn_Gfp	DN549	10	0.161421	0.391858	0.190716	0.411937
