# Supplementary material for: Subcellular sorting of neuregulins controls the assembly of excitatory-inhibitory cortical circuits
Source: eLife. 2020 Dec 15;9:e57000. doi: 10.7554/eLife.57000 (PMC7755390; doi:10.7554/eLife.57000)
Supplement: Figure 6—source data 2. [file elife-57000-fig6-data2.xlsx]

## Sheet: Inhibitory_synapses
Plasmid	Brain	Cell	Count_gad65_cb1r	Perimeter_cell	Density_gad65_cb1r
pSyn_Gfp	DN274	1	4	43.201	0.0925904
pSyn_Gfp	DN274	2	2	38.009	0.0526191
pSyn_Gfp	DN274	3	3	42.037	0.0713657
pSyn_Gfp	DN274	4	2	52.598	0.0380243
pSyn_Gfp	DN274	5	8	37.856	0.211327
pSyn_Gfp	DN274	6	5	45.816	0.109132
pSyn_Gfp	DN274	7	8	49.4	0.161943
pSyn_Gfp	DN274	8	5	44.9	0.111359
pSyn_Gfp	DN274	9	2	45.144	0.0443027
pSyn_Gfp	DN274	10	3	41.319	0.0726058
pSyn_Gfp	DN274	11	7	45.97	0.152273
pSyn_Gfp	DN274	12	5	43.007	0.11626
pSyn_Gfp	DN274	13	5	45.886	0.108966
pSyn_Gfp	DN277	1	6	49.335	0.121618
pSyn_Gfp	DN277	2	4	32.817	0.121888
pSyn_Gfp	DN277	3	6	31.548	0.190186
pSyn_Gfp	DN277	4	2	44.55	0.0448934
pSyn_Gfp	DN277	5	7	37.111	0.188623
pSyn_Gfp	DN277	6	1	53.249	0.0187797
pSyn_Gfp	DN277	7	3	49.134	0.0610575
pSyn_Gfp	DN277	8	4	39.579	0.101064
pSyn_Gfp	DN277	9	4	46.765	0.0855341
pSyn_Gfp	DN277	10	2	34.301	0.0583073
pSyn_Gfp	DN277	11	4	40.041	0.0998976
pSyn_Gfp	DN277	12	11	43.458	0.253118
pSyn_Gfp	DN277	13	1	49.455	0.0202204
pSyn_Gfp	DN277	14	10	52.347	0.191033
pSyn_Gfp	DN277	15	4	36.86	0.108519
pSyn_Gfp	DN277	16	6	46.813	0.12817
pSyn_Gfp	DN277	17	4	41.129	0.097255
pSyn_Gfp	DN277	18	8	45.388	0.176258
pSyn_Gfp	DN278	1	3	34.18	0.0877706
pSyn_Gfp	DN278	2	1	47.573	0.0210203
pSyn_Gfp	DN278	3	3	34.123	0.0879172
pSyn_Gfp	DN278	4	3	35.389	0.0847721
pSyn_Gfp	DN278	5	3	37.581	0.0798276
pSyn_Gfp	DN278	6	8	50.134	0.159572
pSyn_Gfp	DN278	7	14	51.973	0.269371
pSyn_Gfp	DN278	8	11	48.391	0.227315
pSyn_Gfp	DN278	9	5	53.392	0.093647
pSyn_Gfp	DN278	10	5	37.296	0.134063
pSyn_Gfp	DN278	11	5	38.374	0.130297
pSyn_Gfp	DN278	12	3	45.94	0.0653026
pSyn_Gfp	DN278	13	2	29.503	0.0677897
pSyn_Gfp	DN278	14	7	47.925	0.146062
pSyn_Gfp	DN278	15	4	40.012	0.09997
pSyn_Gfp	DN278	16	2	44.079	0.0453731
pSyn_Gfp	DN278	17	4	46.704	0.0856458
pSyn_Gfp	DN278	18	2	34.667	0.0576918
pSyn_Gfp	DN278	19	4	36.426	0.109812
pSyn_Gfp	DN278	20	1	40.168	0.0248954
pSyn_Gfp	DN278	21	7	45.065	0.155331
pSyn_Gfp	DN280	1	9	42.36	0.212465
pSyn_Gfp	DN280	2	1	40.149	0.0249072
pSyn_Gfp	DN280	3	5	44.799	0.11161
pSyn_Gfp	DN280	4	3	40.091	0.0748298
pSyn_Gfp	DN280	5	2	41.443	0.0482591
pSyn_Gfp	DN280	6	6	39.383	0.15235
pSyn_Gfp	DN280	7	2	40.584	0.0492805
pSyn_Gfp	DN280	8	4	46.79	0.0854884
pSyn_Gfp	DN280	9	5	44.631	0.11203
pSyn_Gfp	DN280	10	3	52.036	0.0576524
pSyn_Gfp	DN280	11	4	43.923	0.0910685
pSyn_Gfp	DN280	12	3	32.626	0.0919512
pSyn_Gfp	DN280	13	4	48.915	0.0817745
pSyn_Gfp	DN280	14	1	42.934	0.0232916
pSyn_Gfp	DN280	15	3	42.21	0.0710732
pSyn_Gfp	DN280	16	5	36.101	0.1385
pSyn_Gfp	DN280	17	5	43.453	0.115067
pSyn_Gfp	DN280	18	3	54.061	0.0554929
pSyn_Gfp	DN280	19	3	44.897	0.0668196
pSyn_Gfp	DN273	1	6	33.73	0.177883
pSyn_Gfp	DN273	2	4	38.578	0.103686
pSyn_Gfp	DN273	3	9	41.138	0.218776
pSyn_Gfp	DN273	4	4	35.497	0.112686
pSyn_Gfp	DN273	5	5	37.476	0.133419
pSyn_Gfp	DN273	6	2	41.229	0.0485095
pSyn_Gfp	DN273	7	4	42.021	0.0951905
pSyn_Gfp	DN273	8	8	46.684	0.171365
pSyn_Gfp	DN273	9	6	35.723	0.167959
pSyn_Gfp	DN273	10	4	55.538	0.0720228
pSyn_Gfp	DN273	11	4	49.137	0.0814051
pSyn_Gfp	DN273	12	2	46.082	0.0434009
pSyn_Gfp	DN273	13	2	35.49	0.0563539
pSyn_Gfp	DN273	14	4	43.164	0.0926698
pSyn_Gfp	DN273	15	5	43.327	0.115401
pSyn_Gfp	DN273	16	3	38.643	0.0776337
pSyn_Gfp	DN273	17	3	40.217	0.0745953
pSyn_Gfp	DN273	18	5	37.158	0.134561
pSyn_Gfp	DN273	19	6	38.015	0.157832
pSyn_Gfp	DN282	1	7	40.555	0.172605
pSyn_Gfp	DN282	2	5	40.183	0.124431
pSyn_Gfp	DN282	3	8	39.791	0.20105
pSyn_Gfp	DN282	4	2	49.687	0.040252
pSyn_Gfp	DN282	5	2	39.843	0.050197
pSyn_Gfp	DN282	6	4	35.642	0.112227
pSyn_Gfp	DN282	7	8	37.05	0.215924
pSyn_Gfp	DN282	8	2	39.916	0.0501052
pSyn_Gfp	DN282	9	2	35.387	0.0565179
pSyn_Gfp	DN282	10	4	45.27	0.0883587
pSyn_Gfp	DN282	11	4	40.655	0.0983889
pSyn_Gfp	DN282	12	5	39.416	0.126852
pSyn_Gfp	DN282	13	2	46.151	0.043336
pSyn_Gfp	DN282	14	3	45.012	0.0666489
pSyn_Gfp	DN282	15	4	38.446	0.104042
pSyn_Gfp	DN282	16	5	54.208	0.0922373
pSyn_Gfp	DN282	17	5	45.932	0.108857
pSyn_Gfp	DN282	18	2	46.608	0.0429111
pSyn_Gfp	DN282	19	7	40.98	0.170815
pSyn_Gfp	DN282	20	2	36.844	0.0542829
pSyn_Gfp	DN282	21	7	48.783	0.143493
pSyn_Gfp	DN282	22	12	50.592	0.237192
pSyn_Gfp	DN282	23	8	37.445	0.213647
pSyn_Gfp	DN282	24	2	41.501	0.0481916
pSyn_Gfp	DN282	25	5	43.368	0.115292
pSyn_Gfp	DN282	26	1	43.401	0.0230409
pSyn_Gfp	DN282	27	4	41.369	0.0966908
pSyn_Gfp	DN282	28	2	61.603	0.032466
pSyn_Gfp	DN282	29	13	46.64	0.278731
pSyn_Gfp	DN282	30	2	46.233	0.0432591
pSyn_Nrg1deltaCt_pSyn_Gfp	DN529	1	11	36.399	0.302206
pSyn_Nrg1deltaCt_pSyn_Gfp	DN529	2	7	39.263	0.178285
pSyn_Nrg1deltaCt_pSyn_Gfp	DN529	3	6	33.186	0.180799
pSyn_Nrg1deltaCt_pSyn_Gfp	DN529	4	6	33.172	0.180875
pSyn_Nrg1deltaCt_pSyn_Gfp	DN529	5	8	37.717	0.212106
pSyn_Nrg1deltaCt_pSyn_Gfp	DN529	6	8	39.135	0.204421
pSyn_Nrg1deltaCt_pSyn_Gfp	DN529	7	5	38.901	0.128531
pSyn_Nrg1deltaCt_pSyn_Gfp	DN529	8	5	34.42	0.145264
pSyn_Nrg1deltaCt_pSyn_Gfp	DN529	9	3	41.158	0.0728898
pSyn_Nrg1deltaCt_pSyn_Gfp	DN529	10	7	38.064	0.183901
pSyn_Nrg1deltaCt_pSyn_Gfp	DN529	11	4	42.509	0.0940977
pSyn_Nrg1deltaCt_pSyn_Gfp	DN529	12	7	44.864	0.156027
pSyn_Nrg1deltaCt_pSyn_Gfp	DN529	13	3	37.894	0.0791682
pSyn_Nrg1deltaCt_pSyn_Gfp	DN529	14	0	42.416	0
pSyn_Nrg1deltaCt_pSyn_Gfp	DN529	15	2	49.507	0.0403983
pSyn_Nrg1deltaCt_pSyn_Gfp	DN529	16	4	46.762	0.0855395
pSyn_Nrg1deltaCt_pSyn_Gfp	DN529	17	2	43.958	0.045498
pSyn_Nrg1deltaCt_pSyn_Gfp	DN529	18	2	36.866	0.0542505
pSyn_Nrg1deltaCt_pSyn_Gfp	DN529	19	9	49.019	0.183602
pSyn_Nrg1deltaCt_pSyn_Gfp	DN529	20	5	42.932	0.116463
pSyn_Nrg1deltaCt_pSyn_Gfp	DN529	21	7	44.443	0.157505
pSyn_Nrg1deltaCt_pSyn_Gfp	DN529	22	6	43.277	0.138642
pSyn_Nrg1deltaCt_pSyn_Gfp	DN529	23	12	48.744	0.246184
pSyn_Nrg1deltaCt_pSyn_Gfp	DN529	24	4	38.36	0.104275
pSyn_Nrg1deltaCt_pSyn_Gfp	DN529	25	4	50.589	0.0790686
pSyn_Nrg1deltaCt_pSyn_Gfp	DN529	26	6	46.917	0.127885
pSyn_Nrg1deltaCt_pSyn_Gfp	DN529	27	4	48.946	0.0817227
pSyn_Nrg1deltaCt_pSyn_Gfp	DN530	1	7	43.912	0.15941
pSyn_Nrg1deltaCt_pSyn_Gfp	DN530	2	7	54.339	0.128821
pSyn_Nrg1deltaCt_pSyn_Gfp	DN530	3	3	32.005	0.0937354
pSyn_Nrg1deltaCt_pSyn_Gfp	DN530	4	9	45.29	0.198719
pSyn_Nrg1deltaCt_pSyn_Gfp	DN530	5	5	42.816	0.116779
pSyn_Nrg1deltaCt_pSyn_Gfp	DN530	6	5	52.892	0.0945323
pSyn_Nrg1deltaCt_pSyn_Gfp	DN530	7	3	43.674	0.0686908
pSyn_Nrg1deltaCt_pSyn_Gfp	DN530	8	7	63.734	0.109831
pSyn_Nrg1deltaCt_pSyn_Gfp	DN530	9	4	46.322	0.0863521
pSyn_Nrg1deltaCt_pSyn_Gfp	DN530	10	3	46.427	0.0646176
pSyn_Nrg1deltaCt_pSyn_Gfp	DN530	11	3	48.276	0.0621427
pSyn_Nrg1deltaCt_pSyn_Gfp	DN530	12	6	53.058	0.113084
pSyn_Nrg1deltaCt_pSyn_Gfp	DN530	13	5	52.574	0.095104
pSyn_Nrg1deltaCt_pSyn_Gfp	DN530	14	5	48.473	0.10315
pSyn_Nrg1deltaCt_pSyn_Gfp	DN530	15	4	40.25	0.0993789
pSyn_Nrg1deltaCt_pSyn_Gfp	DN530	16	7	46.772	0.149662
pSyn_Nrg1deltaCt_pSyn_Gfp	DN530	17	6	52.357	0.114598
pSyn_Nrg1deltaCt_pSyn_Gfp	DN530	18	10	49.034	0.20394
pSyn_Nrg1deltaCt_pSyn_Gfp	DN530	19	4	44.656	0.0895736
pSyn_Nrg1deltaCt_pSyn_Gfp	DN531	1	6	38.734	0.154903
pSyn_Nrg1deltaCt_pSyn_Gfp	DN531	2	5	41.825	0.119546
pSyn_Nrg1deltaCt_pSyn_Gfp	DN531	3	7	40.707	0.171961
pSyn_Nrg1deltaCt_pSyn_Gfp	DN531	4	6	46.873	0.128005
pSyn_Nrg1deltaCt_pSyn_Gfp	DN531	5	5	48.569	0.102946
pSyn_Nrg1deltaCt_pSyn_Gfp	DN531	6	5	44.231	0.113043
pSyn_Nrg1deltaCt_pSyn_Gfp	DN531	7	2	44.261	0.0451865
pSyn_Nrg1deltaCt_pSyn_Gfp	DN531	8	10	50.085	0.199661
pSyn_Nrg1deltaCt_pSyn_Gfp	DN531	9	4	38.38	0.104221
pSyn_Nrg1deltaCt_pSyn_Gfp	DN531	10	5	36.58	0.136687
pSyn_Nrg1deltaCt_pSyn_Gfp	DN531	11	6	41.598	0.144238
pSyn_Nrg1deltaCt_pSyn_Gfp	DN531	12	6	41.674	0.143975
pSyn_Nrg1deltaCt_pSyn_Gfp	DN531	13	2	42.502	0.0470566
pSyn_Nrg1deltaCt_pSyn_Gfp	DN531	14	8	48.281	0.165697
pSyn_Nrg1deltaCt_pSyn_Gfp	DN531	15	2	33.101	0.0604211
pSyn_Nrg1deltaCt_pSyn_Gfp	DN531	16	4	48.72	0.0821018
pSyn_Nrg1deltaCt_pSyn_Gfp	DN531	17	3	41.561	0.0721831
pSyn_Nrg1deltaCt_pSyn_Gfp	DN531	18	4	39.077	0.102362
pSyn_Nrg1deltaCt_pSyn_Gfp	DN531	19	10	49.657	0.201381
pSyn_Nrg1deltaCt_pSyn_Gfp	DN531	20	1	36.184	0.0276365
pSyn_Nrg1deltaCt_pSyn_Gfp	DN531	21	7	48.178	0.145295
pSyn_Nrg1deltaCt_pSyn_Gfp	DN542	1	10	43.867	0.227962
pSyn_Nrg1deltaCt_pSyn_Gfp	DN542	2	9	44.263	0.20333
pSyn_Nrg1deltaCt_pSyn_Gfp	DN542	3	6	37.053	0.16193
pSyn_Nrg1deltaCt_pSyn_Gfp	DN542	4	9	41.335	0.217733
pSyn_Nrg1deltaCt_pSyn_Gfp	DN542	5	4	36.646	0.109152
pSyn_Nrg1deltaCt_pSyn_Gfp	DN542	6	7	41.311	0.169446
pSyn_Nrg1deltaCt_pSyn_Gfp	DN542	7	6	41.205	0.145613
pSyn_Nrg1deltaCt_pSyn_Gfp	DN542	8	1	38.276	0.026126
pSyn_Nrg1deltaCt_pSyn_Gfp	DN542	9	5	38.097	0.131244
pSyn_Nrg1deltaCt_pSyn_Gfp	DN542	10	5	38.182	0.130952
pSyn_Nrg1deltaCt_pSyn_Gfp	DN542	11	7	50.237	0.13934
pSyn_Nrg1deltaCt_pSyn_Gfp	DN542	12	4	45.45	0.0880088
pSyn_Nrg1deltaCt_pSyn_Gfp	DN542	13	7	36.911	0.189645
pSyn_Nrg1deltaCt_pSyn_Gfp	DN542	14	5	41.481	0.120537
pSyn_Nrg1deltaCt_pSyn_Gfp	DN542	15	5	41.531	0.120392
pSyn_Nrg1deltaCt_pSyn_Gfp	DN542	16	11	43.629	0.252126
pSyn_Nrg1deltaCt_pSyn_Gfp	DN542	17	5	50.426	0.0991552
pSyn_Nrg1deltaCt_pSyn_Gfp	DN542	18	2	51.316	0.0389742
pSyn_Nrg1deltaCt_pSyn_Gfp	DN542	19	3	49.345	0.0607964
pSyn_Nrg1deltaCt_pSyn_Gfp	DN542	20	6	39.302	0.152664
pSyn_Nrg1deltaCt_pSyn_Gfp	DN542	21	3	36.419	0.0823746
pSyn_Nrg1deltaCt_pSyn_Gfp	DN542	22	4	45.544	0.0878272
pSyn_Nrg1deltaCt_pSyn_Gfp	DN542	23	9	42.739	0.210581
pSyn_Nrg1deltaCt_pSyn_Gfp	DN542	24	6	41.148	0.145815
pSyn_Nrg1deltaCt_pSyn_Gfp	DN542	25	7	49.923	0.140216
pSyn_Nrg1deltaCt_pSyn_Gfp	DN543	1	6	40.48	0.148221
pSyn_Nrg1deltaCt_pSyn_Gfp	DN543	2	6	34.559	0.173616
pSyn_Nrg1deltaCt_pSyn_Gfp	DN543	3	6	46.927	0.127858
pSyn_Nrg1deltaCt_pSyn_Gfp	DN543	4	3	37.755	0.0794597
pSyn_Nrg1deltaCt_pSyn_Gfp	DN543	5	1	28.373	0.0352448
pSyn_Nrg1deltaCt_pSyn_Gfp	DN543	6	8	36.957	0.216468
pSyn_Nrg1deltaCt_pSyn_Gfp	DN543	7	6	47.141	0.127278
pSyn_Nrg1deltaCt_pSyn_Gfp	DN543	8	5	41.562	0.120302
pSyn_Nrg1deltaCt_pSyn_Gfp	DN543	9	2	36.849	0.0542756
pSyn_Nrg1deltaCt_pSyn_Gfp	DN543	10	2	36.63	0.0546001
pSyn_Nrg1deltaCt_pSyn_Gfp	DN543	11	3	39.973	0.0750507
pSyn_Nrg1deltaCt_pSyn_Gfp	DN543	12	10	38.989	0.256483
pSyn_Nrg1deltaCt_pSyn_Gfp	DN543	13	4	40.096	0.0997606
pSyn_Nrg1deltaCt_pSyn_Gfp	DN543	14	5	41.352	0.120913
pSyn_Nrg1deltaCt_pSyn_Gfp	DN543	15	6	46.086	0.130191
pSyn_Nrg1deltaCt_pSyn_Gfp	DN543	16	6	53.465	0.112223
pSyn_Nrg1deltaCt_pSyn_Gfp	DN543	17	3	46.794	0.0641108
pSyn_Nrg1deltaCt_pSyn_Gfp	DN543	18	10	53.623	0.186487
pSyn_Nrg1deltaCt_pSyn_Gfp	DN543	19	12	49.69	0.241497
pSyn_Nrg1deltaCt_pSyn_Gfp	DN543	20	3	47.088	0.0637105
pSyn_Nrg1deltaCt_pSyn_Gfp	DN543	21	2	43.075	0.0464306
pSyn_Nrg1deltaCt_pSyn_Gfp	DN543	22	9	44.323	0.203055
pSyn_Nrg1deltaCt_pSyn_Gfp	DN543	23	5	41.037	0.121841
pSyn_Nrg1deltaCt_pSyn_Gfp	DN543	24	4	38.498	0.103902
pSyn_Nrg1deltaCt_pSyn_Gfp	DN543	25	9	53.84	0.167162
pSyn_Nrg1deltaCt_pSyn_Gfp	DN543	26	3	48.061	0.0624207
pSyn_Nrg1deltaCt_pSyn_Gfp	DN543	27	4	49.167	0.0813554
pSyn_Nrg1deltaCt_pSyn_Gfp	DN543	28	5	58.614	0.0853039
pSyn_Nrg1deltaCt_pSyn_Gfp	DN544	1	7	42.991	0.162825
pSyn_Nrg1deltaCt_pSyn_Gfp	DN544	2	6	45.181	0.132799
pSyn_Nrg1deltaCt_pSyn_Gfp	DN544	3	6	47.427	0.12651
pSyn_Nrg1deltaCt_pSyn_Gfp	DN544	4	14	47.891	0.292331
pSyn_Nrg1deltaCt_pSyn_Gfp	DN544	5	4	51.242	0.078061
pSyn_Nrg1deltaCt_pSyn_Gfp	DN544	6	2	46.21	0.0432807
pSyn_Nrg1deltaCt_pSyn_Gfp	DN544	7	14	44.12	0.317316
pSyn_Nrg1deltaCt_pSyn_Gfp	DN544	8	14	43.377	0.322752
pSyn_Nrg1deltaCt_pSyn_Gfp	DN544	9	4	46.677	0.0856953
pSyn_Nrg1deltaCt_pSyn_Gfp	DN544	10	5	45.863	0.10902
pSyn_Nrg1deltaCt_pSyn_Gfp	DN544	11	7	49.757	0.140684
pSyn_Nrg1deltaCt_pSyn_Gfp	DN544	12	2	44.238	0.04521
pSyn_Nrg1deltaCt_pSyn_Gfp	DN544	13	2	46.372	0.0431295
pSyn_Nrg1deltaCt_pSyn_Gfp	DN544	14	5	48.277	0.103569
pSyn_Nrg1deltaCt_pSyn_Gfp	DN544	15	6	49.956	0.120106
pSyn_Nrg1deltaCt_pSyn_Gfp	DN544	16	2	38.689	0.0516943
pSyn_Nrg1deltaCt_pSyn_Gfp	DN544	17	3	54.358	0.0551897
pSyn_Nrg1deltaCt_pSyn_Gfp	DN544	18	2	35.745	0.0559519
pSyn_Nrg1deltaCt_pSyn_Gfp	DN544	19	6	38.671	0.155155
pSyn_Nrg1deltaCt_pSyn_Gfp	DN544	20	4	40.405	0.0989976
pSyn_Nrg1deltaCt_pSyn_Gfp	DN544	21	7	38.563	0.181521
pSyn_Nrg1deltaCt_pSyn_Gfp	DN544	22	11	50.604	0.217374
pSyn_Nrg1deltaCt_pSyn_Gfp	DN544	23	8	45.655	0.175227
pSyn_Nrg1deltaCt_pSyn_Gfp	DN544	24	8	46.002	0.173905
pSyn_Nrg1deltaCt_pSyn_Gfp	DN544	25	1	47.321	0.0211323
pSyn_Nrg3deltaCt_pSyn_Gfp	DN535	1	9	53.396	0.168552
pSyn_Nrg3deltaCt_pSyn_Gfp	DN535	2	10	46.896	0.213238
pSyn_Nrg3deltaCt_pSyn_Gfp	DN535	3	9	49.72	0.181014
pSyn_Nrg3deltaCt_pSyn_Gfp	DN535	4	12	41.994	0.285755
pSyn_Nrg3deltaCt_pSyn_Gfp	DN535	5	5	48.463	0.103171
pSyn_Nrg3deltaCt_pSyn_Gfp	DN535	6	5	50.514	0.0989825
pSyn_Nrg3deltaCt_pSyn_Gfp	DN535	7	3	49.156	0.0610302
pSyn_Nrg3deltaCt_pSyn_Gfp	DN535	8	10	52.559	0.190262
pSyn_Nrg3deltaCt_pSyn_Gfp	DN535	9	5	62.498	0.0800026
pSyn_Nrg3deltaCt_pSyn_Gfp	DN535	10	11	51.411	0.213962
pSyn_Nrg3deltaCt_pSyn_Gfp	DN535	11	15	59.973	0.250113
pSyn_Nrg3deltaCt_pSyn_Gfp	DN535	12	2	55.229	0.0362129
pSyn_Nrg3deltaCt_pSyn_Gfp	DN535	13	4	54.001	0.0740727
pSyn_Nrg3deltaCt_pSyn_Gfp	DN535	14	1	49.919	0.0200325
pSyn_Nrg3deltaCt_pSyn_Gfp	DN535	15	6	54.842	0.109405
pSyn_Nrg3deltaCt_pSyn_Gfp	DN535	16	10	46.683	0.214211
pSyn_Nrg3deltaCt_pSyn_Gfp	DN535	17	9	57.183	0.157389
pSyn_Nrg3deltaCt_pSyn_Gfp	DN535	18	8	50.635	0.157993
pSyn_Nrg3deltaCt_pSyn_Gfp	DN535	19	2	51.561	0.038789
pSyn_Nrg3deltaCt_pSyn_Gfp	DN535	20	6	58.844	0.101965
pSyn_Nrg3deltaCt_pSyn_Gfp	DN535	21	4	47.652	0.0839419
pSyn_Nrg3deltaCt_pSyn_Gfp	DN535	22	9	55.393	0.162475
pSyn_Nrg3deltaCt_pSyn_Gfp	DN536	1	8	37.322	0.214351
pSyn_Nrg3deltaCt_pSyn_Gfp	DN536	2	3	38.029	0.0788872
pSyn_Nrg3deltaCt_pSyn_Gfp	DN536	3	6	55.094	0.108905
pSyn_Nrg3deltaCt_pSyn_Gfp	DN536	4	4	44.073	0.0907585
pSyn_Nrg3deltaCt_pSyn_Gfp	DN536	5	4	42.647	0.0937932
pSyn_Nrg3deltaCt_pSyn_Gfp	DN536	6	6	53.745	0.111638
pSyn_Nrg3deltaCt_pSyn_Gfp	DN536	7	6	44.918	0.133577
pSyn_Nrg3deltaCt_pSyn_Gfp	DN536	8	10	45.313	0.220687
pSyn_Nrg3deltaCt_pSyn_Gfp	DN536	9	2	46.168	0.04332
pSyn_Nrg3deltaCt_pSyn_Gfp	DN536	10	5	42.23	0.118399
pSyn_Nrg3deltaCt_pSyn_Gfp	DN536	11	6	45.423	0.132092
pSyn_Nrg3deltaCt_pSyn_Gfp	DN536	12	6	63.03	0.0951928
pSyn_Nrg3deltaCt_pSyn_Gfp	DN536	13	6	36.378	0.164935
pSyn_Nrg3deltaCt_pSyn_Gfp	DN536	14	7	34.159	0.204924
pSyn_Nrg3deltaCt_pSyn_Gfp	DN536	15	1	42.532	0.0235117
pSyn_Nrg3deltaCt_pSyn_Gfp	DN536	16	3	46.485	0.0645369
pSyn_Nrg3deltaCt_pSyn_Gfp	DN536	17	2	53.884	0.0371168
pSyn_Nrg3deltaCt_pSyn_Gfp	DN536	18	7	48.95	0.143003
pSyn_Nrg3deltaCt_pSyn_Gfp	DN536	19	5	41.515	0.120438
pSyn_Nrg3deltaCt_pSyn_Gfp	DN536	20	5	43.815	0.114116
pSyn_Nrg3deltaCt_pSyn_Gfp	DN545	1	8	42.973	0.186163
pSyn_Nrg3deltaCt_pSyn_Gfp	DN545	2	7	42.544	0.164536
pSyn_Nrg3deltaCt_pSyn_Gfp	DN545	3	5	47.467	0.105336
pSyn_Nrg3deltaCt_pSyn_Gfp	DN545	4	6	48.329	0.124149
pSyn_Nrg3deltaCt_pSyn_Gfp	DN545	5	7	35.442	0.197506
pSyn_Nrg3deltaCt_pSyn_Gfp	DN545	6	7	46.509	0.150509
pSyn_Nrg3deltaCt_pSyn_Gfp	DN545	7	4	50.077	0.079877
pSyn_Nrg3deltaCt_pSyn_Gfp	DN545	8	3	45.629	0.0657477
pSyn_Nrg3deltaCt_pSyn_Gfp	DN545	9	1	55.241	0.0181025
pSyn_Nrg3deltaCt_pSyn_Gfp	DN545	10	13	37.926	0.342773
pSyn_Nrg3deltaCt_pSyn_Gfp	DN545	11	6	44.058	0.136184
pSyn_Nrg3deltaCt_pSyn_Gfp	DN545	12	6	53.475	0.112202
pSyn_Nrg3deltaCt_pSyn_Gfp	DN545	13	7	43.145	0.162244
pSyn_Nrg3deltaCt_pSyn_Gfp	DN545	14	6	58.381	0.102773
pSyn_Nrg3deltaCt_pSyn_Gfp	DN545	15	3	39.665	0.0756334
pSyn_Nrg3deltaCt_pSyn_Gfp	DN545	16	3	41.719	0.0719097
pSyn_Nrg3deltaCt_pSyn_Gfp	DN545	17	5	44.409	0.11259
pSyn_Nrg3deltaCt_pSyn_Gfp	DN545	18	5	49.678	0.100648
pSyn_Nrg3deltaCt_pSyn_Gfp	DN545	19	10	41.99	0.238152
pSyn_Nrg3deltaCt_pSyn_Gfp	DN545	20	1	43.983	0.0227361
pSyn_Nrg3deltaCt_pSyn_Gfp	DN548	1	8	40.961	0.195308
pSyn_Nrg3deltaCt_pSyn_Gfp	DN548	2	4	37.241	0.107409
pSyn_Nrg3deltaCt_pSyn_Gfp	DN548	3	3	42.121	0.0712234
pSyn_Nrg3deltaCt_pSyn_Gfp	DN548	4	7	40.037	0.174838
pSyn_Nrg3deltaCt_pSyn_Gfp	DN548	5	4	33.922	0.117918
pSyn_Nrg3deltaCt_pSyn_Gfp	DN548	6	6	37.806	0.158705
pSyn_Nrg3deltaCt_pSyn_Gfp	DN548	7	7	47.813	0.146404
pSyn_Nrg3deltaCt_pSyn_Gfp	DN548	8	5	34.459	0.1451
pSyn_Nrg3deltaCt_pSyn_Gfp	DN548	9	3	39.366	0.0762079
pSyn_Nrg3deltaCt_pSyn_Gfp	DN548	10	1	43.644	0.0229127
pSyn_Nrg3deltaCt_pSyn_Gfp	DN548	11	6	45.858	0.130839
pSyn_Nrg3deltaCt_pSyn_Gfp	DN548	12	7	46.205	0.151499
pSyn_Nrg3deltaCt_pSyn_Gfp	DN548	13	8	40.605	0.19702
pSyn_Nrg3deltaCt_pSyn_Gfp	DN548	14	2	43.231	0.0462631
pSyn_Nrg3deltaCt_pSyn_Gfp	DN548	15	0	43.971	0
pSyn_Nrg3deltaCt_pSyn_Gfp	DN548	16	6	38.087	0.157534
pSyn_Nrg3deltaCt_pSyn_Gfp	DN548	17	6	45.431	0.132068
pSyn_Nrg3deltaCt_pSyn_Gfp	DN548	18	5	40.357	0.123894
pSyn_Nrg3deltaCt_pSyn_Gfp	DN548	19	3	42.639	0.0703581
pSyn_Nrg3deltaCt_pSyn_Gfp	DN548	20	12	44.865	0.267469
pSyn_Nrg3deltaCt_pSyn_Gfp	DN548	21	3	47.506	0.0631499
pSyn_Nrg3deltaCt_pSyn_Gfp	DN548	22	3	50.701	0.0591704
pSyn_Nrg3deltaCt_pSyn_Gfp	DN548	23	5	42.12	0.118708
pSyn_Nrg3deltaCt_pSyn_Gfp	DN548	24	4	44.051	0.0908038
pSyn_Nrg3deltaCt_pSyn_Gfp	DN548	25	1	35.893	0.0278606
pSyn_Nrg3deltaCt_pSyn_Gfp	DN549	1	3	39.853	0.0752766
pSyn_Nrg3deltaCt_pSyn_Gfp	DN549	2	7	48.678	0.143802
pSyn_Nrg3deltaCt_pSyn_Gfp	DN549	3	3	45.799	0.0655036
pSyn_Nrg3deltaCt_pSyn_Gfp	DN549	4	7	43.417	0.161227
pSyn_Nrg3deltaCt_pSyn_Gfp	DN549	5	4	48.255	0.082893
pSyn_Nrg3deltaCt_pSyn_Gfp	DN549	6	6	41.963	0.142983
pSyn_Nrg3deltaCt_pSyn_Gfp	DN549	7	4	46.423	0.0861642
pSyn_Nrg3deltaCt_pSyn_Gfp	DN549	8	7	40.959	0.170903
pSyn_Nrg3deltaCt_pSyn_Gfp	DN549	9	1	46.21	0.0216403
pSyn_Nrg3deltaCt_pSyn_Gfp	DN549	10	2	50.041	0.0399672
pSyn_Nrg3deltaCt_pSyn_Gfp	DN549	11	2	40.815	0.0490016
pSyn_Nrg3deltaCt_pSyn_Gfp	DN549	12	6	47.476	0.12638
pSyn_Nrg3deltaCt_pSyn_Gfp	DN549	13	1	43.166	0.0231664
pSyn_Nrg3deltaCt_pSyn_Gfp	DN549	14	5	47.291	0.105728
pSyn_Nrg3deltaCt_pSyn_Gfp	DN549	15	7	50.459	0.138726
pSyn_Nrg3deltaCt_pSyn_Gfp	DN549	16	7	51.808	0.135114
pSyn_Nrg3deltaCt_pSyn_Gfp	DN549	17	5	55.073	0.0907886
pSyn_Nrg3deltaCt_pSyn_Gfp	DN549	18	3	49.819	0.060218
pSyn_Nrg3deltaCt_pSyn_Gfp	DN549	19	9	49.688	0.18113
pSyn_Nrg3deltaCt_pSyn_Gfp	DN549	20	16	50.511	0.316763
pSyn_Nrg3deltaCt_pSyn_Gfp	DN549	21	3	56.353	0.0532359
pSyn_Nrg3deltaCt_pSyn_Gfp	DN549	22	8	49.839	0.160517
pSyn_Nrg3deltaCt_pSyn_Gfp	DN549	23	4	45.087	0.0887174
pSyn_Nrg3deltaCt_pSyn_Gfp	DN549	24	1	44.039	0.0227071
pSyn_Nrg3deltaCt_pSyn_Gfp	DN549	25	2	43.733	0.0457321
pSyn_Nrg3deltaCt_pSyn_Gfp	DN549	26	2	43.231	0.0462631
pSyn_Nrg3deltaCt_pSyn_Gfp	DN549	27	6	43.883	0.136727
pSyn_Nrg3deltaCt_pSyn_Gfp	DN550	1	11	43.294	0.254077
pSyn_Nrg3deltaCt_pSyn_Gfp	DN550	2	5	43.204	0.11573
pSyn_Nrg3deltaCt_pSyn_Gfp	DN550	3	8	41.389	0.193288
pSyn_Nrg3deltaCt_pSyn_Gfp	DN550	4	2	39.053	0.0512125
pSyn_Nrg3deltaCt_pSyn_Gfp	DN550	5	11	43.089	0.255286
pSyn_Nrg3deltaCt_pSyn_Gfp	DN550	6	7	49.449	0.14156
pSyn_Nrg3deltaCt_pSyn_Gfp	DN550	7	8	45.638	0.175293
pSyn_Nrg3deltaCt_pSyn_Gfp	DN550	8	8	43.792	0.182682
pSyn_Nrg3deltaCt_pSyn_Gfp	DN550	9	6	43.703	0.13729
pSyn_Nrg3deltaCt_pSyn_Gfp	DN550	10	6	39.977	0.150086
pSyn_Nrg3deltaCt_pSyn_Gfp	DN550	11	7	43.353	0.161465
pSyn_Nrg3deltaCt_pSyn_Gfp	DN550	12	10	44.447	0.224987
pSyn_Nrg3deltaCt_pSyn_Gfp	DN550	13	3	37.78	0.0794071
pSyn_Nrg3deltaCt_pSyn_Gfp	DN550	14	3	49.83	0.0602047
pSyn_Nrg3deltaCt_pSyn_Gfp	DN550	15	5	41.509	0.120456
pSyn_Nrg3deltaCt_pSyn_Gfp	DN550	16	6	44.578	0.134596
pSyn_Nrg3deltaCt_pSyn_Gfp	DN550	17	5	51.171	0.0977116
pSyn_Nrg3deltaCt_pSyn_Gfp	DN550	18	5	46.599	0.107298
pSyn_Nrg3deltaCt_pSyn_Gfp	DN550	19	1	43.852	0.022804
pSyn_Nrg3deltaCt_pSyn_Gfp	DN550	20	4	45.147	0.0885995
pSyn_Nrg3deltaCt_pSyn_Gfp	DN550	21	9	52.113	0.172702
pSyn_Nrg3deltaCt_pSyn_Gfp	DN550	22	12	49.092	0.244439
pSyn_Nrg3deltaCt_pSyn_Gfp	DN550	23	3	43.607	0.0687963
pSyn_Nrg3deltaCt_pSyn_Gfp	DN550	24	6	46.586	0.128794

## Sheet: Excitatory_synapses
Plasmid	Brain	Cell	Count_vglut1_tdt_psd95	Perimeter_cell	Density_vglut1_tdt_pds95
pSyn_Gfp	DN274	1	11	61.365	0.179255
pSyn_Gfp	DN274	2	9	67.807	0.13273
pSyn_Gfp	DN274	3	7	52.643	0.132971
pSyn_Gfp	DN274	4	2	51.068	0.0391635
pSyn_Gfp	DN274	5	13	62.412	0.208293
pSyn_Gfp	DN274	6	7	63.12	0.1109
pSyn_Gfp	DN274	7	0	56.118	0
pSyn_Gfp	DN274	8	4	55.309	0.072321
pSyn_Gfp	DN274	9	5	63.686	0.0785102
pSyn_Gfp	DN274	10	6	56.034	0.107078
pSyn_Gfp	DN274	11	4	49.5	0.0808081
pSyn_Gfp	DN274	12	3	59.979	0.0500175
pSyn_Gfp	DN274	13	10	61.604	0.162327
pSyn_Gfp	DN274	14	8	59.768	0.133851
pSyn_Gfp	DN274	15	10	54.008	0.185158
pSyn_Gfp	DN274	16	6	66.908	0.0896754
pSyn_Gfp	DN275	1	9	66.535	0.135267
pSyn_Gfp	DN275	2	4	70.719	0.0565619
pSyn_Gfp	DN275	3	19	56.976	0.333474
pSyn_Gfp	DN275	4	1	74.301	0.0134588
pSyn_Gfp	DN275	5	4	59.481	0.0672484
pSyn_Gfp	DN275	6	8	61.054	0.131032
pSyn_Gfp	DN275	7	8	65.673	0.121816
pSyn_Gfp	DN275	8	8	66.963	0.119469
pSyn_Gfp	DN275	9	2	57.557	0.0347482
pSyn_Gfp	DN275	10	5	60.917	0.0820789
pSyn_Gfp	DN275	11	9	63.574	0.141567
pSyn_Gfp	DN275	12	5	57.382	0.0871353
pSyn_Gfp	DN275	13	7	55.339	0.126493
pSyn_Gfp	DN275	14	5	63.201	0.0791127
pSyn_Gfp	DN275	15	5	59.373	0.0842134
pSyn_Gfp	DN275	16	3	48.487	0.0618723
pSyn_Gfp	DN275	17	9	72.116	0.124799
pSyn_Gfp	DN275	18	9	67.724	0.132892
pSyn_Gfp	DN275	19	5	65.331	0.0765333
pSyn_Gfp	DN275	20	6	64.194	0.0934667
pSyn_Gfp	DN275	21	6	62.209	0.0964491
pSyn_Gfp	DN277	1	1	55.324	0.0180753
pSyn_Gfp	DN277	2	3	55.095	0.0544514
pSyn_Gfp	DN277	3	7	61.809	0.113252
pSyn_Gfp	DN277	4	4	49.856	0.0802311
pSyn_Gfp	DN277	5	12	59.719	0.200941
pSyn_Gfp	DN277	6	10	60.429	0.165483
pSyn_Gfp	DN277	7	2	73.872	0.0270739
pSyn_Gfp	DN277	8	7	71.575	0.0977995
pSyn_Gfp	DN277	9	3	65.418	0.0458589
pSyn_Gfp	DN277	10	9	48.111	0.187067
pSyn_Gfp	DN277	11	5	66.545	0.0751371
pSyn_Gfp	DN277	12	7	57.911	0.120875
pSyn_Gfp	DN277	13	2	67.659	0.02956
pSyn_Gfp	DN277	14	6	48.674	0.123269
pSyn_Gfp	DN277	15	7	55.619	0.125856
pSyn_Gfp	DN277	16	7	48.443	0.1445
pSyn_Gfp	DN277	17	6	61.538	0.0975007
pSyn_Gfp	DN277	18	6	56.239	0.106688
pSyn_Gfp	DN277	19	3	62.937	0.0476667
pSyn_Gfp	DN277	20	6	57.702	0.103983
pSyn_Gfp	DN277	21	5	51.19	0.0976753
pSyn_Gfp	DN278	1	7	51.867	0.134961
pSyn_Gfp	DN278	2	3	51.534	0.058214
pSyn_Gfp	DN278	3	4	61.269	0.0652859
pSyn_Gfp	DN278	4	5	51.495	0.0970968
pSyn_Gfp	DN278	5	6	64.349	0.0932415
pSyn_Gfp	DN278	6	4	73.171	0.0546665
pSyn_Gfp	DN278	7	3	48.525	0.0618238
pSyn_Gfp	DN278	8	9	58.31	0.154347
pSyn_Gfp	DN278	9	4	59.662	0.0670444
pSyn_Gfp	DN278	10	6	54.817	0.109455
pSyn_Gfp	DN278	11	4	54.21	0.0737871
pSyn_Gfp	DN278	12	4	53.614	0.0746074
pSyn_Gfp	DN278	13	6	57.496	0.104355
pSyn_Gfp	DN278	14	3	59.786	0.050179
pSyn_Gfp	DN278	15	9	61.915	0.145361
pSyn_Gfp	DN278	16	8	61.677	0.129708
pSyn_Gfp	DN280	1	6	56.382	0.106417
pSyn_Gfp	DN280	2	6	55.175	0.108745
pSyn_Gfp	DN280	3	2	55.12	0.0362845
pSyn_Gfp	DN280	4	8	66.473	0.12035
pSyn_Gfp	DN280	5	8	56.822	0.140791
pSyn_Gfp	DN280	6	7	69.413	0.100846
pSyn_Gfp	DN280	7	5	83.317	0.0600118
pSyn_Gfp	DN280	8	5	61.318	0.0815421
pSyn_Gfp	DN280	9	5	58.508	0.0854584
pSyn_Gfp	DN280	10	12	65.445	0.18336
pSyn_Gfp	DN280	11	12	58.822	0.204005
pSyn_Gfp	DN280	12	8	66.613	0.120097
pSyn_Gfp	DN280	13	6	64.096	0.0936096
pSyn_Gfp	DN280	14	3	55.992	0.0535791
pSyn_Gfp	DN280	15	5	54.612	0.091555
pSyn_Gfp	DN280	16	7	64.738	0.108128
pSyn_Gfp	DN280	17	6	65.884	0.0910692
pSyn_Gfp	DN280	18	3	60.254	0.0497892
pSyn_Gfp	DN280	19	4	49.062	0.0815295
pSyn_Gfp	DN280	20	5	56.499	0.0884971
pSyn_Gfp	DN281	1	5	54.078	0.092459
pSyn_Gfp	DN281	2	2	48.582	0.0411675
pSyn_Gfp	DN281	3	4	44.754	0.0893775
pSyn_Gfp	DN281	4	6	62.794	0.0955505
pSyn_Gfp	DN281	5	3	50.23	0.0597253
pSyn_Gfp	DN281	6	5	54.946	0.0909984
pSyn_Gfp	DN281	7	6	62.053	0.0966915
pSyn_Gfp	DN281	8	6	54.307	0.110483
pSyn_Gfp	DN281	9	4	58.489	0.0683889
pSyn_Gfp	DN281	10	5	51.834	0.0964618
pSyn_Gfp	DN281	11	7	49.665	0.140944
pSyn_Gfp	DN281	12	7	60.958	0.114833
pSyn_Gfp	DN281	13	3	61.369	0.0488846
pSyn_Gfp	DN281	14	6	49.42	0.121408
pSyn_Gfp	DN281	15	7	47.627	0.146975
pSyn_Gfp	DN281	16	6	66.702	0.0899523
pSyn_Gfp	DN281	17	9	63.099	0.142633
pSyn_Gfp	DN281	18	9	52.805	0.170438
pSyn_Gfp	DN281	19	4	53.055	0.0753935
pSyn_Gfp	DN276	1	2	46.97	0.0425804
pSyn_Gfp	DN276	2	6	60.603	0.099005
pSyn_Gfp	DN276	3	6	56.827	0.105584
pSyn_Gfp	DN276	4	3	57.322	0.0523359
pSyn_Gfp	DN276	5	3	56.776	0.0528392
pSyn_Gfp	DN276	6	3	59.184	0.0506894
pSyn_Gfp	DN276	7	3	52.357	0.0572989
pSyn_Gfp	DN276	8	5	49.634	0.100737
pSyn_Gfp	DN276	9	9	61.169	0.147133
pSyn_Gfp	DN276	10	10	66.069	0.151357
pSyn_Gfp	DN276	11	3	56.683	0.0529259
pSyn_Gfp	DN276	12	6	50.713	0.118313
pSyn_Gfp	DN276	13	1	43.416	0.023033
pSyn_Gfp	DN276	14	8	53.838	0.148594
pSyn_Gfp	DN276	15	0	57.424	0
pSyn_Gfp	DN276	16	1	50.95	0.0196271
pSyn_Gfp	DN279	1	6	48.81	0.122926
pSyn_Gfp	DN279	2	5	46.626	0.107236
pSyn_Gfp	DN279	3	5	40.213	0.124338
pSyn_Gfp	DN279	4	2	56.888	0.0351568
pSyn_Gfp	DN279	5	10	70.992	0.140861
pSyn_Gfp	DN279	6	7	62.164	0.112605
pSyn_Gfp	DN279	7	3	51.219	0.058572
pSyn_Gfp	DN279	8	5	53.149	0.0940751
pSyn_Gfp	DN279	9	5	62	0.0806452
pSyn_Gfp	DN279	10	6	52.018	0.115345
pSyn_Gfp	DN279	11	12	50.708	0.236649
pSyn_Gfp	DN279	12	2	58.911	0.0339495
pSyn_Gfp	DN279	13	2	66.666	0.0300003
pSyn_Gfp	DN279	14	4	61.794	0.0647312
pSyn_Gfp	DN282	1	3	47.134	0.0636483
pSyn_Gfp	DN282	2	1	32.711	0.0305708
pSyn_Gfp	DN282	3	5	47.93	0.104319
pSyn_Gfp	DN282	4	4	38.85	0.10296
pSyn_Gfp	DN282	5	6	52.372	0.114565
pSyn_Gfp	DN282	6	11	64.738	0.169916
pSyn_Gfp	DN282	7	5	48.041	0.104078
pSyn_Gfp	DN282	8	6	58.799	0.102043
pSyn_Gfp	DN282	9	5	58.42	0.0855871
pSyn_Gfp	DN282	10	5	55.053	0.0908216
pSyn_Gfp	DN282	11	5	52.918	0.0944858
pSyn_Gfp	DN282	12	5	60.483	0.0826679
pSyn_Gfp	DN282	13	8	54.181	0.147653
pSyn_Gfp	DN282	14	7	63.582	0.110094
pSyn_Gfp	DN282	15	14	50.857	0.275282
pSyn_Gfp	DN282	16	5	43.812	0.114124
pSyn_Gfp	DN282	17	3	56.056	0.0535179
pSyn_Gfp	DN282	18	6	56.535	0.106129
pSyn_Gfp	DN282	19	3	62.456	0.0480338
pSyn_Gfp	DN282	20	11	62.263	0.17667
pSyn_Gfp	DN282	21	2	50.41	0.0396747
pSyn_Gfp	DN282	22	3	51.388	0.0583794
pSyn_Gfp	DN282	23	6	50.382	0.11909
pSyn_Gfp	DN282	24	12	53.894	0.222659
pSyn_Nrg1deltaCt_pSyn_Gfp	DN530	1	2	45.805	0.0436634
pSyn_Nrg1deltaCt_pSyn_Gfp	DN530	2	6	54.335	0.110426
pSyn_Nrg1deltaCt_pSyn_Gfp	DN530	3	13	52.755	0.246422
pSyn_Nrg1deltaCt_pSyn_Gfp	DN530	4	8	52.809	0.151489
pSyn_Nrg1deltaCt_pSyn_Gfp	DN530	5	3	54.807	0.0547375
pSyn_Nrg1deltaCt_pSyn_Gfp	DN530	6	5	64.767	0.0771998
pSyn_Nrg1deltaCt_pSyn_Gfp	DN530	7	3	50.056	0.0599329
pSyn_Nrg1deltaCt_pSyn_Gfp	DN530	8	2	58.815	0.0340049
pSyn_Nrg1deltaCt_pSyn_Gfp	DN530	9	7	62.038	0.112834
pSyn_Nrg1deltaCt_pSyn_Gfp	DN530	10	4	48.152	0.0830703
pSyn_Nrg1deltaCt_pSyn_Gfp	DN530	11	7	40.968	0.170865
pSyn_Nrg1deltaCt_pSyn_Gfp	DN530	12	3	42.463	0.0706497
pSyn_Nrg1deltaCt_pSyn_Gfp	DN530	13	5	57.453	0.0870277
pSyn_Nrg1deltaCt_pSyn_Gfp	DN530	14	14	58.747	0.23831
pSyn_Nrg1deltaCt_pSyn_Gfp	DN530	15	8	60.522	0.132183
pSyn_Nrg1deltaCt_pSyn_Gfp	DN530	16	4	65.785	0.0608041
pSyn_Nrg1deltaCt_pSyn_Gfp	DN530	17	7	45.626	0.153421
pSyn_Nrg1deltaCt_pSyn_Gfp	DN530	18	16	67.14	0.238308
pSyn_Nrg1deltaCt_pSyn_Gfp	DN530	19	8	48.641	0.16447
pSyn_Nrg1deltaCt_pSyn_Gfp	DN530	20	6	47.63	0.125971
pSyn_Nrg1deltaCt_pSyn_Gfp	DN531	1	5	49.741	0.100521
pSyn_Nrg1deltaCt_pSyn_Gfp	DN531	2	4	45.474	0.0879624
pSyn_Nrg1deltaCt_pSyn_Gfp	DN531	3	4	55.499	0.0720734
pSyn_Nrg1deltaCt_pSyn_Gfp	DN531	4	7	50.948	0.137395
pSyn_Nrg1deltaCt_pSyn_Gfp	DN531	5	6	52.718	0.113813
pSyn_Nrg1deltaCt_pSyn_Gfp	DN531	6	10	53.2	0.18797
pSyn_Nrg1deltaCt_pSyn_Gfp	DN531	7	5	53.099	0.0941637
pSyn_Nrg1deltaCt_pSyn_Gfp	DN531	8	2	49.927	0.0400585
pSyn_Nrg1deltaCt_pSyn_Gfp	DN531	9	6	57.498	0.104351
pSyn_Nrg1deltaCt_pSyn_Gfp	DN531	10	8	52.572	0.152172
pSyn_Nrg1deltaCt_pSyn_Gfp	DN531	11	11	52.56	0.209285
pSyn_Nrg1deltaCt_pSyn_Gfp	DN531	12	9	53.523	0.168152
pSyn_Nrg1deltaCt_pSyn_Gfp	DN531	13	9	41.46	0.217077
pSyn_Nrg1deltaCt_pSyn_Gfp	DN531	14	6	46.177	0.129935
pSyn_Nrg1deltaCt_pSyn_Gfp	DN531	15	11	49.103	0.224019
pSyn_Nrg1deltaCt_pSyn_Gfp	DN531	16	4	49.879	0.0801941
pSyn_Nrg1deltaCt_pSyn_Gfp	DN531	17	16	52.943	0.302212
pSyn_Nrg1deltaCt_pSyn_Gfp	DN531	18	5	47.24	0.105843
pSyn_Nrg1deltaCt_pSyn_Gfp	DN531	19	4	42.486	0.0941487
pSyn_Nrg1deltaCt_pSyn_Gfp	DN531	20	19	45.988	0.413151
pSyn_Nrg1deltaCt_pSyn_Gfp	DN531	21	2	49.508	0.0403975
pSyn_Nrg1deltaCt_pSyn_Gfp	DN531	22	13	53.896	0.241205
pSyn_Nrg1deltaCt_pSyn_Gfp	DN531	23	8	65.698	0.121769
pSyn_Nrg1deltaCt_pSyn_Gfp	DN542	1	4	40.511	0.0987386
pSyn_Nrg1deltaCt_pSyn_Gfp	DN542	2	5	38.932	0.128429
pSyn_Nrg1deltaCt_pSyn_Gfp	DN542	3	4	49.128	0.08142
pSyn_Nrg1deltaCt_pSyn_Gfp	DN542	4	12	42.61	0.281624
pSyn_Nrg1deltaCt_pSyn_Gfp	DN542	5	6	51.892	0.115625
pSyn_Nrg1deltaCt_pSyn_Gfp	DN542	6	12	47.3	0.2537
pSyn_Nrg1deltaCt_pSyn_Gfp	DN542	7	8	40.671	0.1967
pSyn_Nrg1deltaCt_pSyn_Gfp	DN542	8	8	50.283	0.159099
pSyn_Nrg1deltaCt_pSyn_Gfp	DN542	9	7	53.336	0.131243
pSyn_Nrg1deltaCt_pSyn_Gfp	DN542	10	8	51.747	0.154598
pSyn_Nrg1deltaCt_pSyn_Gfp	DN542	11	9	57.181	0.157395
pSyn_Nrg1deltaCt_pSyn_Gfp	DN542	12	4	55.039	0.0726757
pSyn_Nrg1deltaCt_pSyn_Gfp	DN542	13	16	45.332	0.352952
pSyn_Nrg1deltaCt_pSyn_Gfp	DN542	14	6	51.212	0.11716
pSyn_Nrg1deltaCt_pSyn_Gfp	DN542	15	6	51.638	0.116194
pSyn_Nrg1deltaCt_pSyn_Gfp	DN542	16	7	47.515	0.147322
pSyn_Nrg1deltaCt_pSyn_Gfp	DN542	17	15	58.515	0.256345
pSyn_Nrg1deltaCt_pSyn_Gfp	DN542	18	7	44.358	0.157807
pSyn_Nrg1deltaCt_pSyn_Gfp	DN542	19	4	49.641	0.0805786
pSyn_Nrg1deltaCt_pSyn_Gfp	DN542	20	7	44.409	0.157626
pSyn_Nrg1deltaCt_pSyn_Gfp	DN542	21	4	46.88	0.0853242
pSyn_Nrg1deltaCt_pSyn_Gfp	DN542	22	6	47.383	0.126628
pSyn_Nrg1deltaCt_pSyn_Gfp	DN542	23	9	48.152	0.186908
pSyn_Nrg1deltaCt_pSyn_Gfp	DN543	1	2	43.314	0.0461744
pSyn_Nrg1deltaCt_pSyn_Gfp	DN543	2	11	59.938	0.183523
pSyn_Nrg1deltaCt_pSyn_Gfp	DN543	3	8	54.531	0.146706
pSyn_Nrg1deltaCt_pSyn_Gfp	DN543	4	4	59.732	0.0669658
pSyn_Nrg1deltaCt_pSyn_Gfp	DN543	5	6	56.873	0.105498
pSyn_Nrg1deltaCt_pSyn_Gfp	DN543	6	12	63.301	0.18957
pSyn_Nrg1deltaCt_pSyn_Gfp	DN543	7	11	45.98	0.239234
pSyn_Nrg1deltaCt_pSyn_Gfp	DN543	8	5	65.622	0.076194
pSyn_Nrg1deltaCt_pSyn_Gfp	DN543	9	6	61.203	0.0980344
pSyn_Nrg1deltaCt_pSyn_Gfp	DN543	10	1	55.306	0.0180812
pSyn_Nrg1deltaCt_pSyn_Gfp	DN543	11	5	49.368	0.10128
pSyn_Nrg1deltaCt_pSyn_Gfp	DN543	12	9	61.985	0.145196
pSyn_Nrg1deltaCt_pSyn_Gfp	DN543	13	4	53.705	0.074481
pSyn_Nrg1deltaCt_pSyn_Gfp	DN543	14	11	53.274	0.20648
pSyn_Nrg1deltaCt_pSyn_Gfp	DN543	15	5	46.335	0.10791
pSyn_Nrg1deltaCt_pSyn_Gfp	DN543	16	8	60.115	0.133078
pSyn_Nrg1deltaCt_pSyn_Gfp	DN543	17	10	65.439	0.152814
pSyn_Nrg1deltaCt_pSyn_Gfp	DN543	18	6	47.595	0.126064
pSyn_Nrg1deltaCt_pSyn_Gfp	DN543	19	3	58.088	0.0516458
pSyn_Nrg1deltaCt_pSyn_Gfp	DN543	20	22	65.335	0.336726
pSyn_Nrg1deltaCt_pSyn_Gfp	DN543	21	7	59.497	0.117653
pSyn_Nrg1deltaCt_pSyn_Gfp	DN544	1	11	47.689	0.230661
pSyn_Nrg1deltaCt_pSyn_Gfp	DN544	2	7	65.807	0.106372
pSyn_Nrg1deltaCt_pSyn_Gfp	DN544	3	6	54.543	0.110005
pSyn_Nrg1deltaCt_pSyn_Gfp	DN544	4	3	48.978	0.061252
pSyn_Nrg1deltaCt_pSyn_Gfp	DN544	5	6	52.088	0.11519
pSyn_Nrg1deltaCt_pSyn_Gfp	DN544	6	4	61.171	0.0653905
pSyn_Nrg1deltaCt_pSyn_Gfp	DN544	7	3	66.23	0.0452967
pSyn_Nrg1deltaCt_pSyn_Gfp	DN544	8	2	59.798	0.0334459
pSyn_Nrg1deltaCt_pSyn_Gfp	DN544	9	10	63.793	0.156757
pSyn_Nrg1deltaCt_pSyn_Gfp	DN544	10	8	63.355	0.126273
pSyn_Nrg1deltaCt_pSyn_Gfp	DN544	11	6	30.838	0.194565
pSyn_Nrg1deltaCt_pSyn_Gfp	DN544	12	6	44.133	0.135953
pSyn_Nrg1deltaCt_pSyn_Gfp	DN544	13	8	43.643	0.183305
pSyn_Nrg1deltaCt_pSyn_Gfp	DN544	14	4	62.306	0.0641993
pSyn_Nrg1deltaCt_pSyn_Gfp	DN544	15	7	56.396	0.124122
pSyn_Nrg1deltaCt_pSyn_Gfp	DN544	16	6	68.564	0.0875095
pSyn_Nrg1deltaCt_pSyn_Gfp	DN544	17	11	72.074	0.152621
pSyn_Nrg1deltaCt_pSyn_Gfp	DN544	18	8	64.896	0.123274
pSyn_Nrg1deltaCt_pSyn_Gfp	DN544	19	4	47.847	0.0835998
pSyn_Nrg1deltaCt_pSyn_Gfp	DN544	20	4	54.749	0.0730607
pSyn_Nrg3deltaCt_pSyn_Gfp	DN536	1	7	57.892	0.120915
pSyn_Nrg3deltaCt_pSyn_Gfp	DN536	2	5	54.144	0.0923463
pSyn_Nrg3deltaCt_pSyn_Gfp	DN536	3	2	49.418	0.0404711
pSyn_Nrg3deltaCt_pSyn_Gfp	DN536	4	6	60.963	0.0984204
pSyn_Nrg3deltaCt_pSyn_Gfp	DN536	5	8	57.316	0.139577
pSyn_Nrg3deltaCt_pSyn_Gfp	DN536	6	8	43.578	0.183579
pSyn_Nrg3deltaCt_pSyn_Gfp	DN536	7	4	64.153	0.0623509
pSyn_Nrg3deltaCt_pSyn_Gfp	DN536	8	9	44.78	0.200983
pSyn_Nrg3deltaCt_pSyn_Gfp	DN536	9	10	49.606	0.201589
pSyn_Nrg3deltaCt_pSyn_Gfp	DN536	10	5	56.797	0.0880328
pSyn_Nrg3deltaCt_pSyn_Gfp	DN536	11	7	47.65	0.146905
pSyn_Nrg3deltaCt_pSyn_Gfp	DN536	12	12	47.106	0.254745
pSyn_Nrg3deltaCt_pSyn_Gfp	DN536	13	11	53.303	0.206367
pSyn_Nrg3deltaCt_pSyn_Gfp	DN536	14	4	49.431	0.0809209
pSyn_Nrg3deltaCt_pSyn_Gfp	DN536	15	9	70.081	0.128423
pSyn_Nrg3deltaCt_pSyn_Gfp	DN536	16	8	42.645	0.187595
pSyn_Nrg3deltaCt_pSyn_Gfp	DN536	17	8	54.356	0.147178
pSyn_Nrg3deltaCt_pSyn_Gfp	DN536	18	8	70.366	0.113691
pSyn_Nrg3deltaCt_pSyn_Gfp	DN536	19	9	45.384	0.198308
pSyn_Nrg3deltaCt_pSyn_Gfp	DN536	20	8	55.397	0.144412
pSyn_Nrg3deltaCt_pSyn_Gfp	DN536	21	7	52.547	0.133214
pSyn_Nrg3deltaCt_pSyn_Gfp	DN536	22	4	38.097	0.104995
pSyn_Nrg3deltaCt_pSyn_Gfp	DN536	23	5	42.148	0.11863
pSyn_Nrg3deltaCt_pSyn_Gfp	DN536	24	8	60.137	0.13303
pSyn_Nrg3deltaCt_pSyn_Gfp	DN545	1	3	45.65	0.0657174
pSyn_Nrg3deltaCt_pSyn_Gfp	DN545	2	15	56.547	0.265266
pSyn_Nrg3deltaCt_pSyn_Gfp	DN545	3	5	49.102	0.101829
pSyn_Nrg3deltaCt_pSyn_Gfp	DN545	4	8	36.57	0.218759
pSyn_Nrg3deltaCt_pSyn_Gfp	DN545	5	10	51.524	0.194084
pSyn_Nrg3deltaCt_pSyn_Gfp	DN545	6	8	53.064	0.150761
pSyn_Nrg3deltaCt_pSyn_Gfp	DN545	7	6	67.901	0.0883639
pSyn_Nrg3deltaCt_pSyn_Gfp	DN545	8	10	58.922	0.169716
pSyn_Nrg3deltaCt_pSyn_Gfp	DN545	9	12	53.123	0.225891
pSyn_Nrg3deltaCt_pSyn_Gfp	DN545	10	8	60.939	0.131279
pSyn_Nrg3deltaCt_pSyn_Gfp	DN545	11	10	58.955	0.169621
pSyn_Nrg3deltaCt_pSyn_Gfp	DN545	12	3	47.542	0.0631021
pSyn_Nrg3deltaCt_pSyn_Gfp	DN545	13	7	76.177	0.0918913
pSyn_Nrg3deltaCt_pSyn_Gfp	DN545	14	10	60.979	0.163991
pSyn_Nrg3deltaCt_pSyn_Gfp	DN545	15	7	59.813	0.117031
pSyn_Nrg3deltaCt_pSyn_Gfp	DN545	16	7	57.705	0.121307
pSyn_Nrg3deltaCt_pSyn_Gfp	DN545	17	8	52.207	0.153236
pSyn_Nrg3deltaCt_pSyn_Gfp	DN548	1	8	60.244	0.132793
pSyn_Nrg3deltaCt_pSyn_Gfp	DN548	2	6	48.361	0.124067
pSyn_Nrg3deltaCt_pSyn_Gfp	DN548	3	6	55.535	0.10804
pSyn_Nrg3deltaCt_pSyn_Gfp	DN548	4	1	48.534	0.0206041
pSyn_Nrg3deltaCt_pSyn_Gfp	DN548	5	6	47.487	0.12635
pSyn_Nrg3deltaCt_pSyn_Gfp	DN548	6	8	62.797	0.127395
pSyn_Nrg3deltaCt_pSyn_Gfp	DN548	7	3	60.565	0.0495336
pSyn_Nrg3deltaCt_pSyn_Gfp	DN548	8	4	41.97	0.0953062
pSyn_Nrg3deltaCt_pSyn_Gfp	DN548	9	10	48.772	0.205036
pSyn_Nrg3deltaCt_pSyn_Gfp	DN548	10	5	39.305	0.12721
pSyn_Nrg3deltaCt_pSyn_Gfp	DN548	11	7	44.314	0.157964
pSyn_Nrg3deltaCt_pSyn_Gfp	DN548	12	7	53.733	0.130274
pSyn_Nrg3deltaCt_pSyn_Gfp	DN548	13	9	52.988	0.16985
pSyn_Nrg3deltaCt_pSyn_Gfp	DN548	14	4	47.55	0.084122
pSyn_Nrg3deltaCt_pSyn_Gfp	DN548	15	11	51.571	0.213298
pSyn_Nrg3deltaCt_pSyn_Gfp	DN548	16	6	49.244	0.121842
pSyn_Nrg3deltaCt_pSyn_Gfp	DN548	17	6	42.539	0.141047
pSyn_Nrg3deltaCt_pSyn_Gfp	DN548	18	9	60.69	0.148295
pSyn_Nrg3deltaCt_pSyn_Gfp	DN548	19	11	55.33	0.198807
pSyn_Nrg3deltaCt_pSyn_Gfp	DN548	20	2	44.323	0.0451233
pSyn_Nrg3deltaCt_pSyn_Gfp	DN548	21	4	59.26	0.0674992
pSyn_Nrg3deltaCt_pSyn_Gfp	DN548	22	15	63.459	0.236373
pSyn_Nrg3deltaCt_pSyn_Gfp	DN548	23	8	60.351	0.132558
pSyn_Nrg3deltaCt_pSyn_Gfp	DN548	24	7	57.604	0.121519
pSyn_Nrg3deltaCt_pSyn_Gfp	DN549	1	4	49.906	0.0801507
pSyn_Nrg3deltaCt_pSyn_Gfp	DN549	2	5	48.114	0.10392
pSyn_Nrg3deltaCt_pSyn_Gfp	DN549	3	14	58.558	0.239079
pSyn_Nrg3deltaCt_pSyn_Gfp	DN549	4	11	62.063	0.177239
pSyn_Nrg3deltaCt_pSyn_Gfp	DN549	5	4	49.783	0.0803487
pSyn_Nrg3deltaCt_pSyn_Gfp	DN549	6	9	63.691	0.141307
pSyn_Nrg3deltaCt_pSyn_Gfp	DN549	7	9	54.151	0.166202
pSyn_Nrg3deltaCt_pSyn_Gfp	DN549	8	6	47.503	0.126308
pSyn_Nrg3deltaCt_pSyn_Gfp	DN549	9	6	57.256	0.104793
pSyn_Nrg3deltaCt_pSyn_Gfp	DN549	10	5	66.829	0.0748178
pSyn_Nrg3deltaCt_pSyn_Gfp	DN549	11	8	44.844	0.178396
pSyn_Nrg3deltaCt_pSyn_Gfp	DN549	12	10	63.721	0.156934
pSyn_Nrg3deltaCt_pSyn_Gfp	DN549	13	12	67.738	0.177153
pSyn_Nrg3deltaCt_pSyn_Gfp	DN549	14	4	67.241	0.0594875
pSyn_Nrg3deltaCt_pSyn_Gfp	DN549	15	6	50.445	0.118941
pSyn_Nrg3deltaCt_pSyn_Gfp	DN549	16	8	56.284	0.142136
pSyn_Nrg3deltaCt_pSyn_Gfp	DN549	17	8	47.381	0.168844
pSyn_Nrg3deltaCt_pSyn_Gfp	DN549	18	3	45.892	0.0653709
pSyn_Nrg3deltaCt_pSyn_Gfp	DN549	19	11	53.496	0.205623
pSyn_Nrg3deltaCt_pSyn_Gfp	DN549	20	4	46.235	0.0865145
pSyn_Nrg3deltaCt_pSyn_Gfp	DN549	21	12	59.41	0.201986
pSyn_Nrg3deltaCt_pSyn_Gfp	DN549	22	3	52.633	0.0569985
pSyn_Nrg3deltaCt_pSyn_Gfp	DN549	23	6	50.261	0.119377
pSyn_Nrg3deltaCt_pSyn_Gfp	DN550	1	5	49.234	0.101556
pSyn_Nrg3deltaCt_pSyn_Gfp	DN550	2	13	49.77	0.261202
pSyn_Nrg3deltaCt_pSyn_Gfp	DN550	3	6	35.96	0.166852
pSyn_Nrg3deltaCt_pSyn_Gfp	DN550	4	5	55.102	0.0907408
pSyn_Nrg3deltaCt_pSyn_Gfp	DN550	5	4	61.324	0.0652273
pSyn_Nrg3deltaCt_pSyn_Gfp	DN550	6	5	50.787	0.0984504
pSyn_Nrg3deltaCt_pSyn_Gfp	DN550	7	15	47.509	0.31573
pSyn_Nrg3deltaCt_pSyn_Gfp	DN550	8	6	39.246	0.152882
pSyn_Nrg3deltaCt_pSyn_Gfp	DN550	9	6	52.912	0.113396
pSyn_Nrg3deltaCt_pSyn_Gfp	DN550	10	3	54.776	0.0547685
pSyn_Nrg3deltaCt_pSyn_Gfp	DN550	11	7	48.021	0.14577
pSyn_Nrg3deltaCt_pSyn_Gfp	DN550	12	9	54.887	0.163973
pSyn_Nrg3deltaCt_pSyn_Gfp	DN550	13	11	52.66	0.208887
pSyn_Nrg3deltaCt_pSyn_Gfp	DN550	14	7	51.958	0.134724
pSyn_Nrg3deltaCt_pSyn_Gfp	DN550	15	9	50.484	0.178274
pSyn_Nrg3deltaCt_pSyn_Gfp	DN550	16	3	50.784	0.0590737
pSyn_Nrg3deltaCt_pSyn_Gfp	DN550	17	4	57.018	0.0701533
pSyn_Nrg3deltaCt_pSyn_Gfp	DN550	18	8	47.041	0.170064
pSyn_Nrg3deltaCt_pSyn_Gfp	DN550	19	3	53.902	0.0556566
pSyn_Nrg3deltaCt_pSyn_Gfp	DN550	20	4	60.727	0.0658686
pSyn_Nrg3deltaCt_pSyn_Gfp	DN550	21	5	49.677	0.10065
pSyn_Nrg3deltaCt_pSyn_Gfp	DN550	22	5	61.868	0.0808172
pSyn_Nrg3deltaCt_pSyn_Gfp	DN550	23	3	50.214	0.0597443
